# Supplementary material for: Phylogenomics analysis of velvet regulators in the fungal kingdom
Source: PubMed Central journal article supplement (PMC10845976; doi:10.1128/spectrum.03717-23), 2024-01-05
Supplement: spectrum.03717-23-s0001.pdf [file spectrum.03717-23-s0001.pdf]

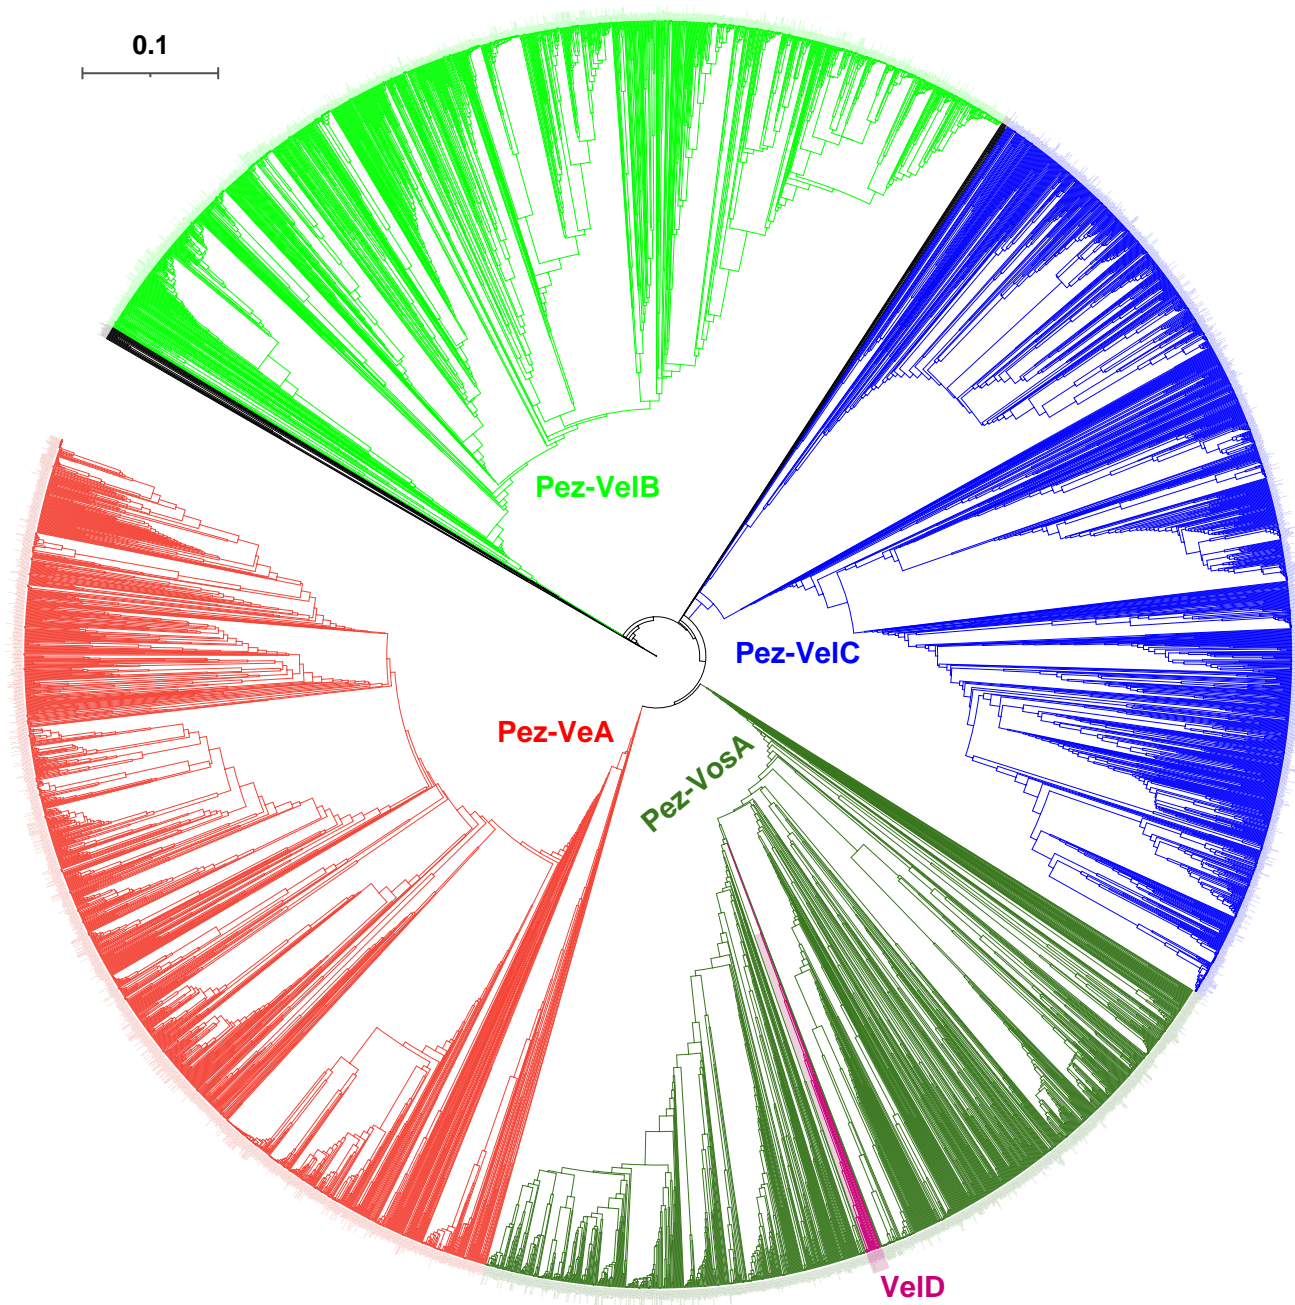

**Fig. S1. Phylogenetic relationship of the Pezizomycotina velvet proteins.** The figure is a high definition version of **Fig. 6** in the maintext.

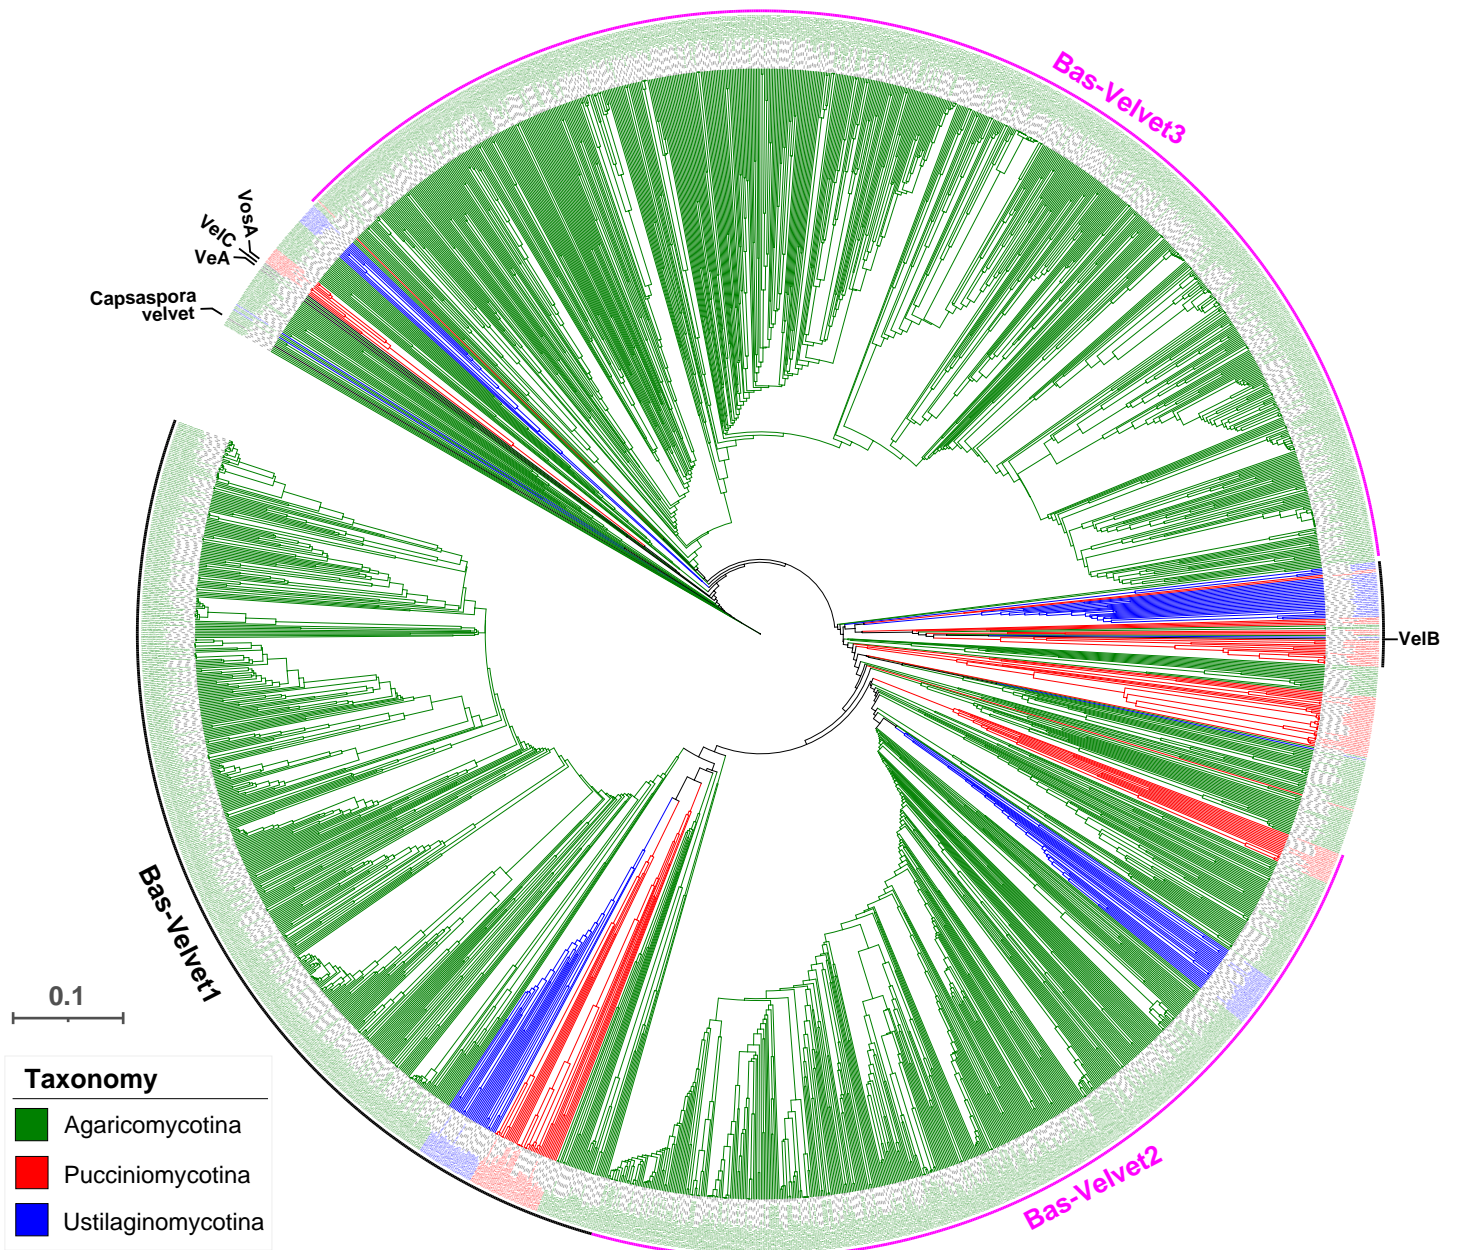

**Fig. S2. Phylogenetic relationship of the Basidiomycota velvet proteins.** The figure is a high definition version of **Fig. 9** in the maintext.

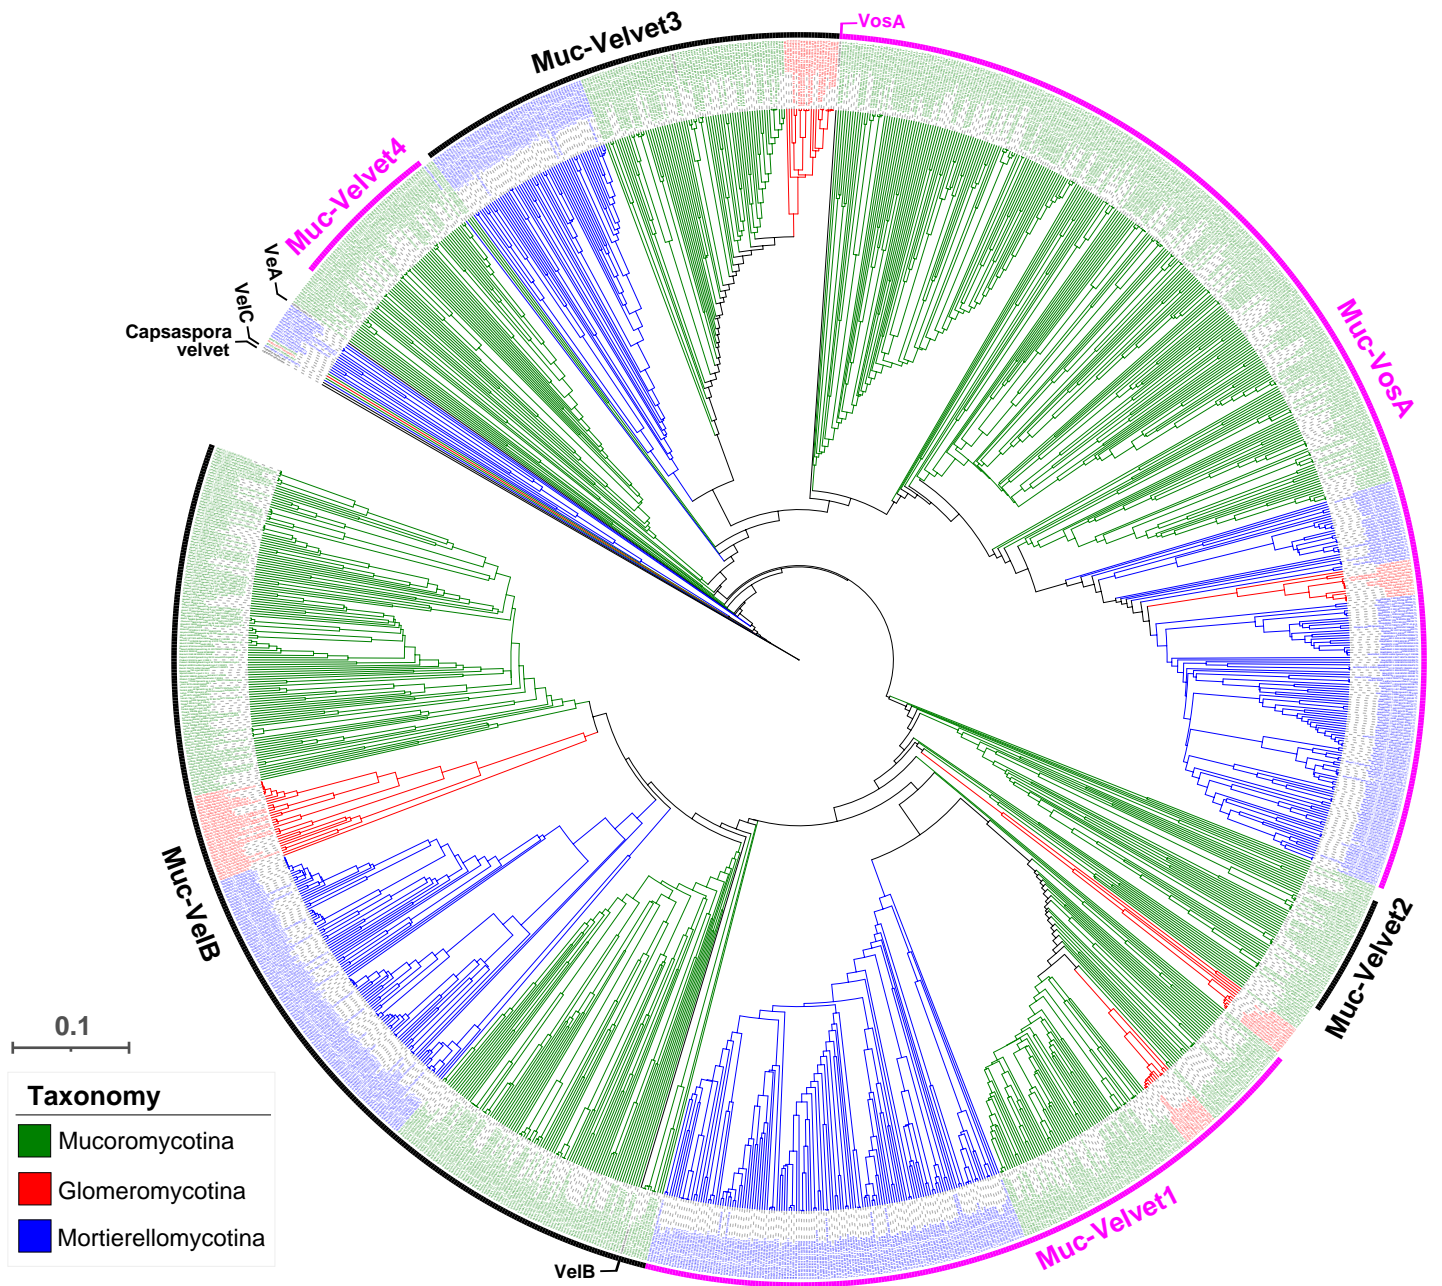

**Fig. S3. Phylogenetic relationship of the Mucoromycota velvet proteins.** The figure is a high definition version of Fig. 11 in the maintext.

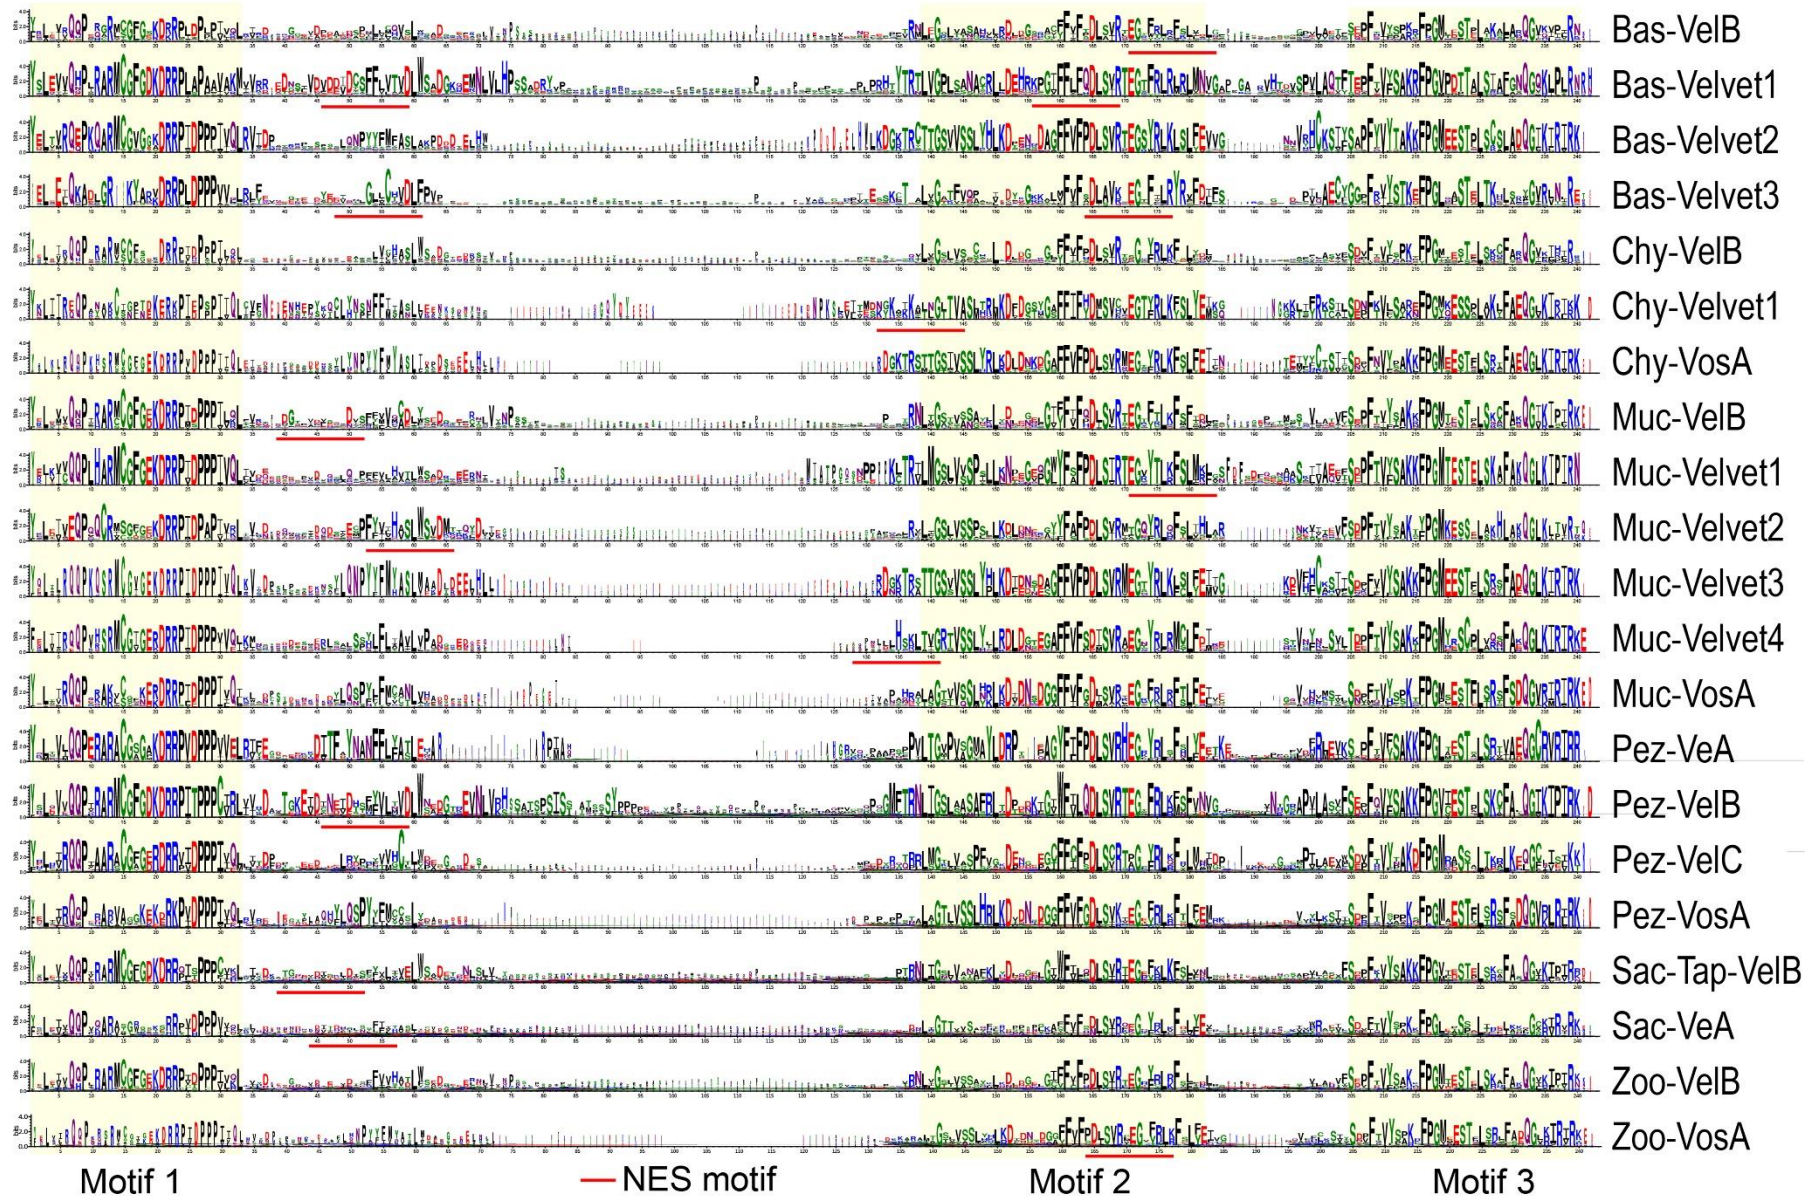

**Fig. S4. Sequence logo of velvet domains of the 21 major clades.** The alignment of velvet domains was performed by against the profile hidden Markov model of velvet domain PF11754 with 243 residues (<https://www.ebi.ac.uk/interpro/entry/pfam/PF11754/>). The three characteristic motifs are highlight in yellow and also present in Fig. 17. The predicted NES motifs are underlined by red lines

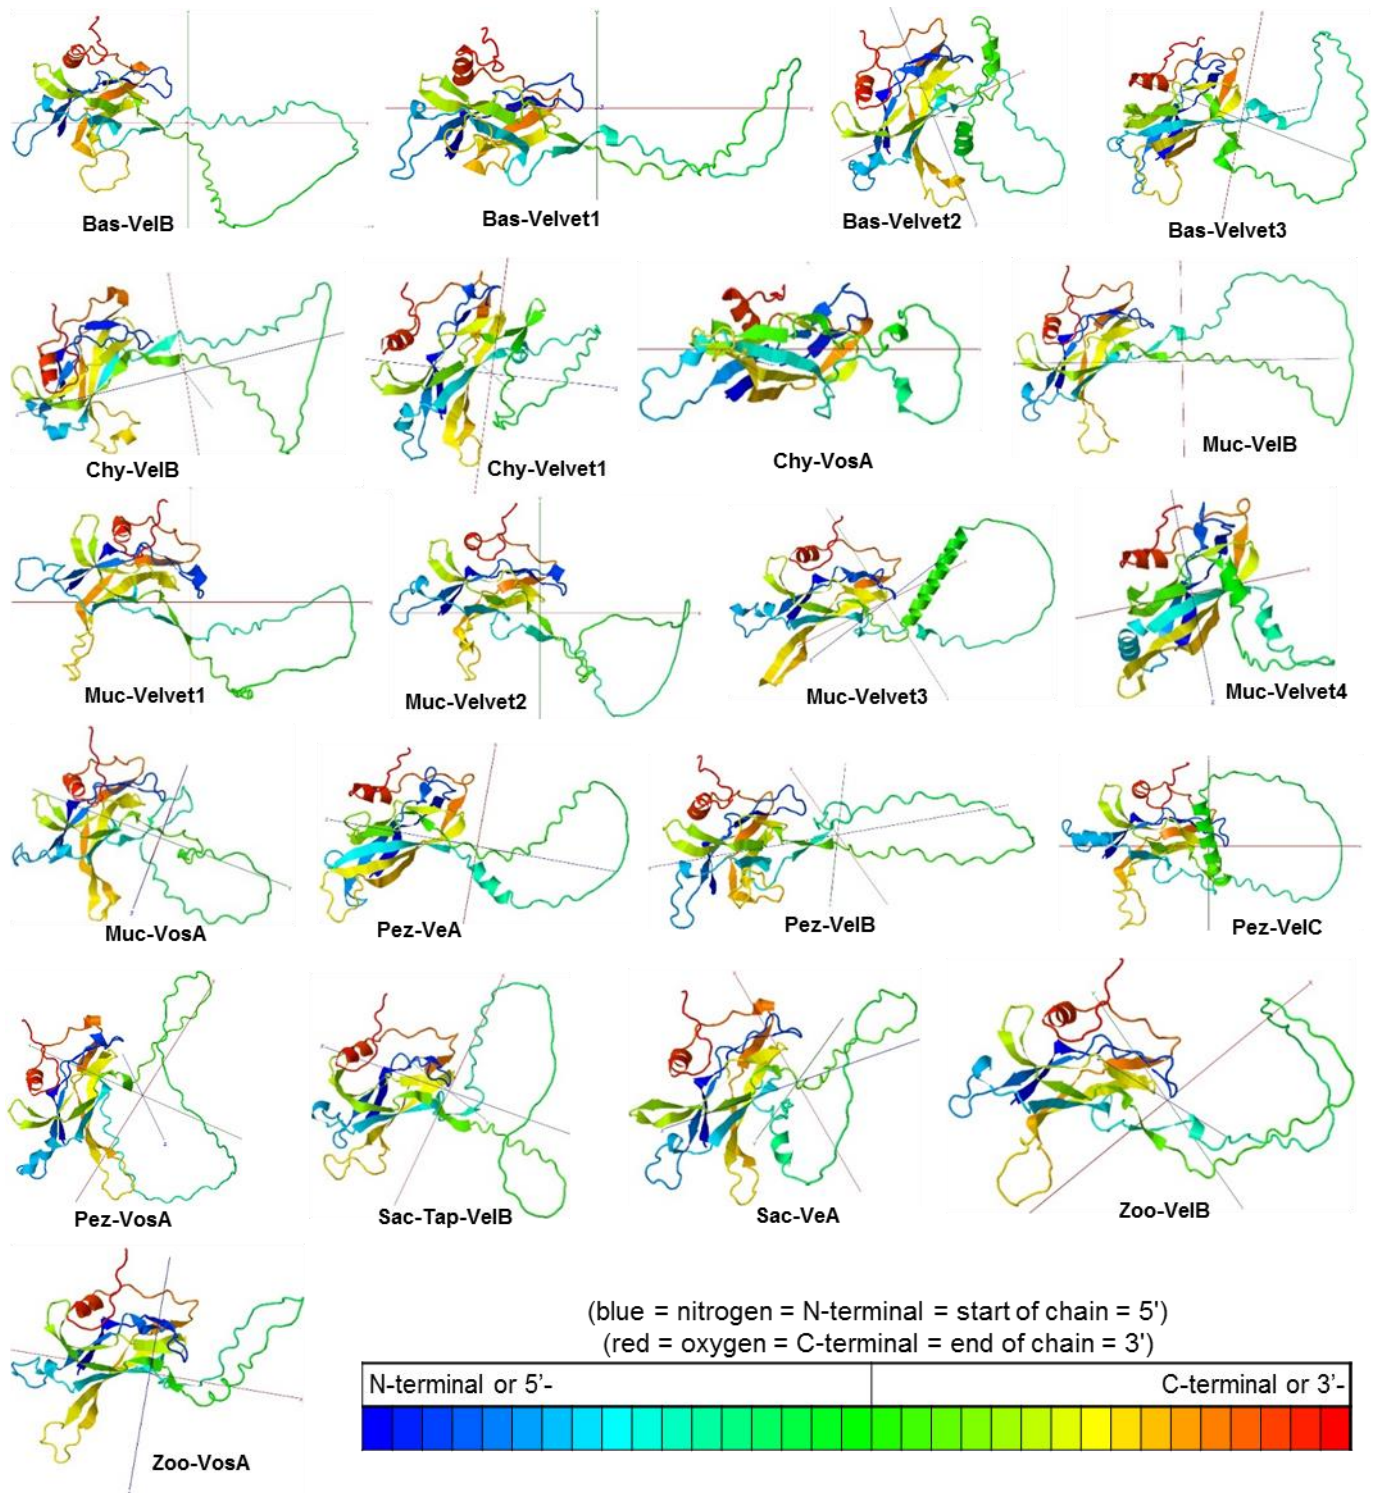

**Fig. S5. 3D structures of the 21 velvet domains modelled by AlphaFold 2.** Consensus sequences of velvet domains of the 21 clades revealed in Fig. S4 were used for AlphaFold modelling and the top-ranked 3D structure figures were outputted by Jmol. A reverse rainbow gradient (bgyor) as below is used to color according to position of the corresponding residues along a chain.

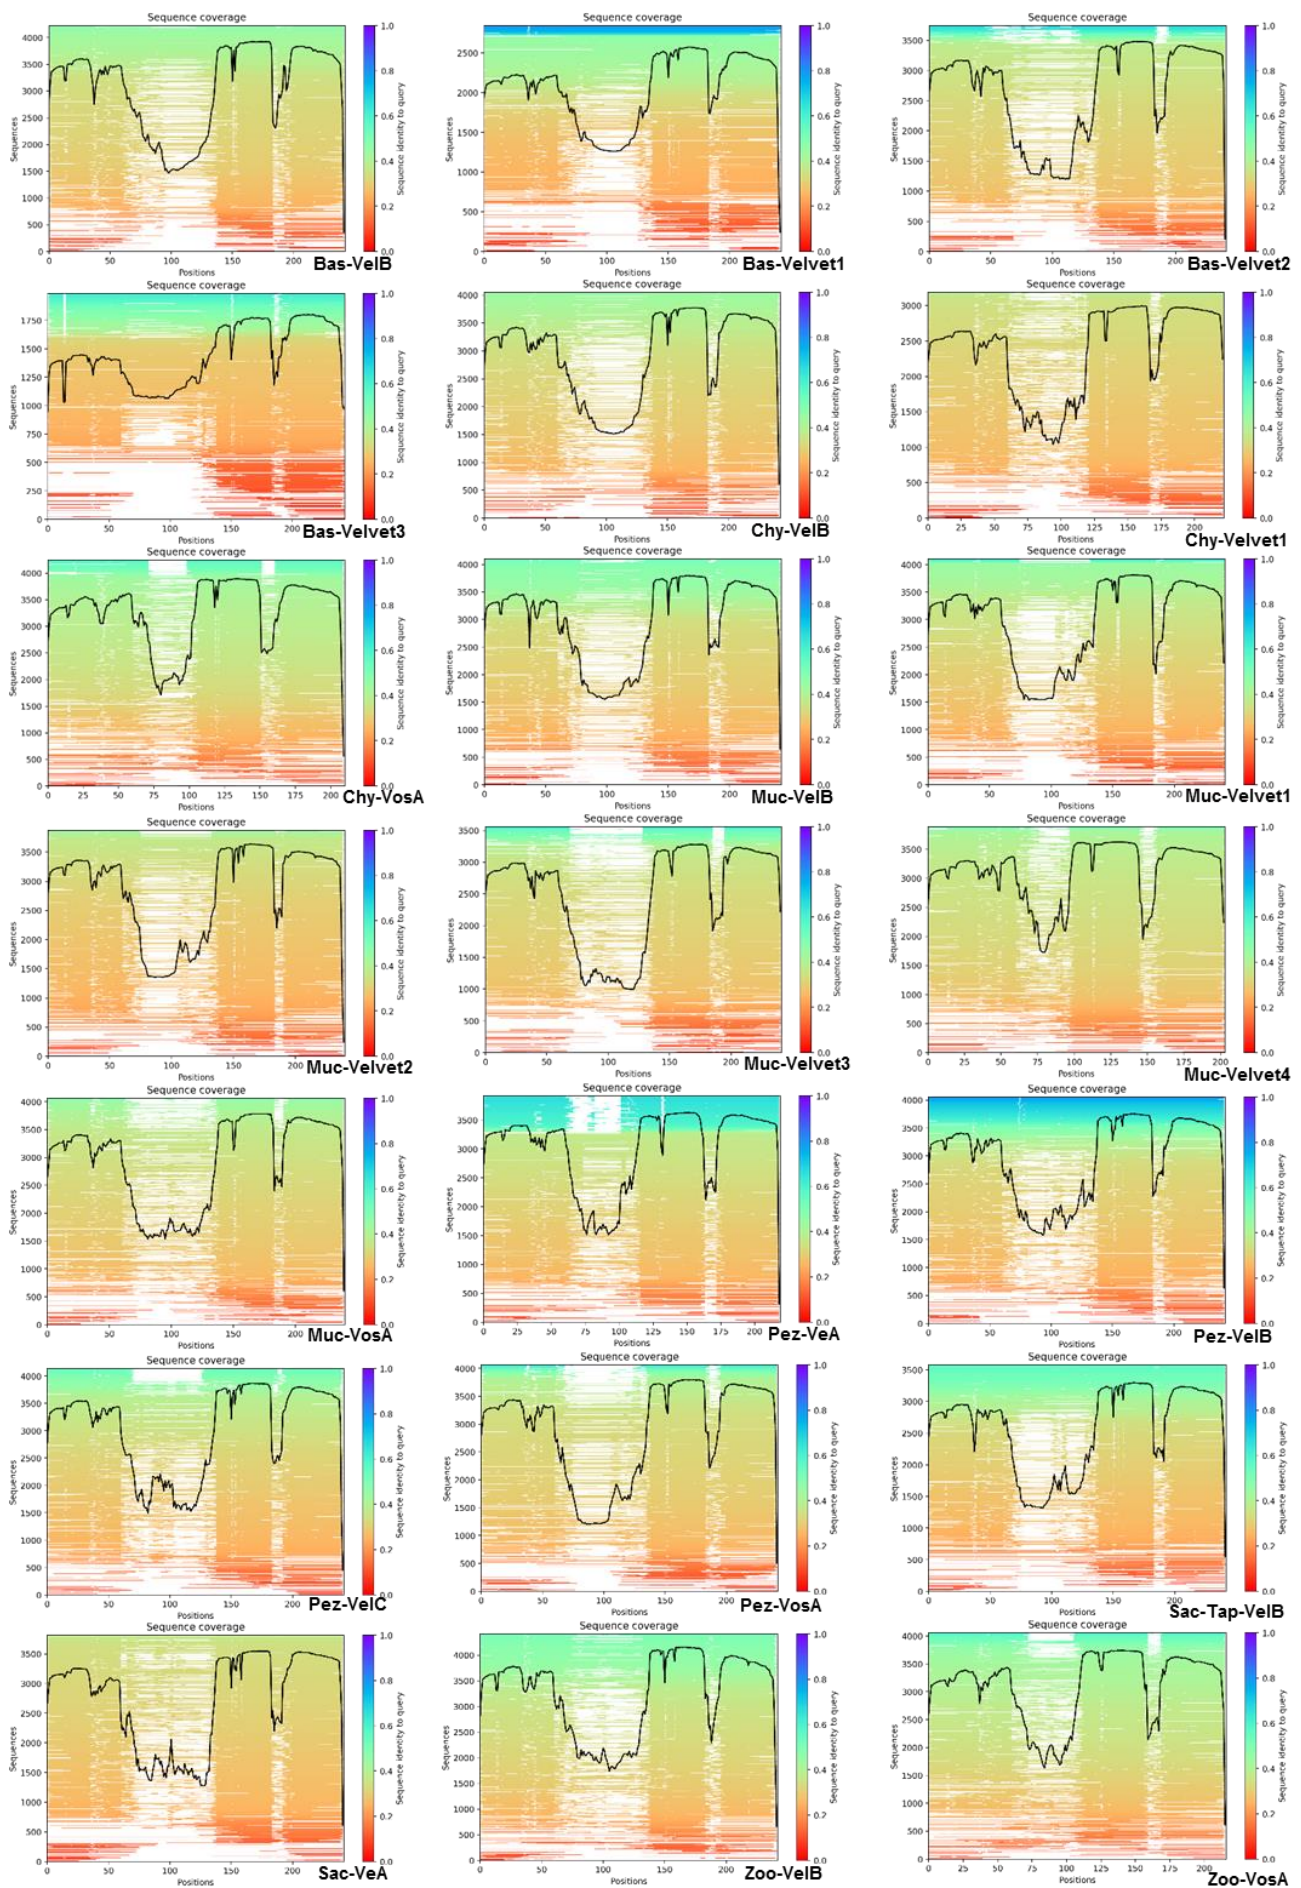

**Fig. S6. Multiple sequence alignment depth and diversity of the 21 consensus sequences generated by the ColabFold.**

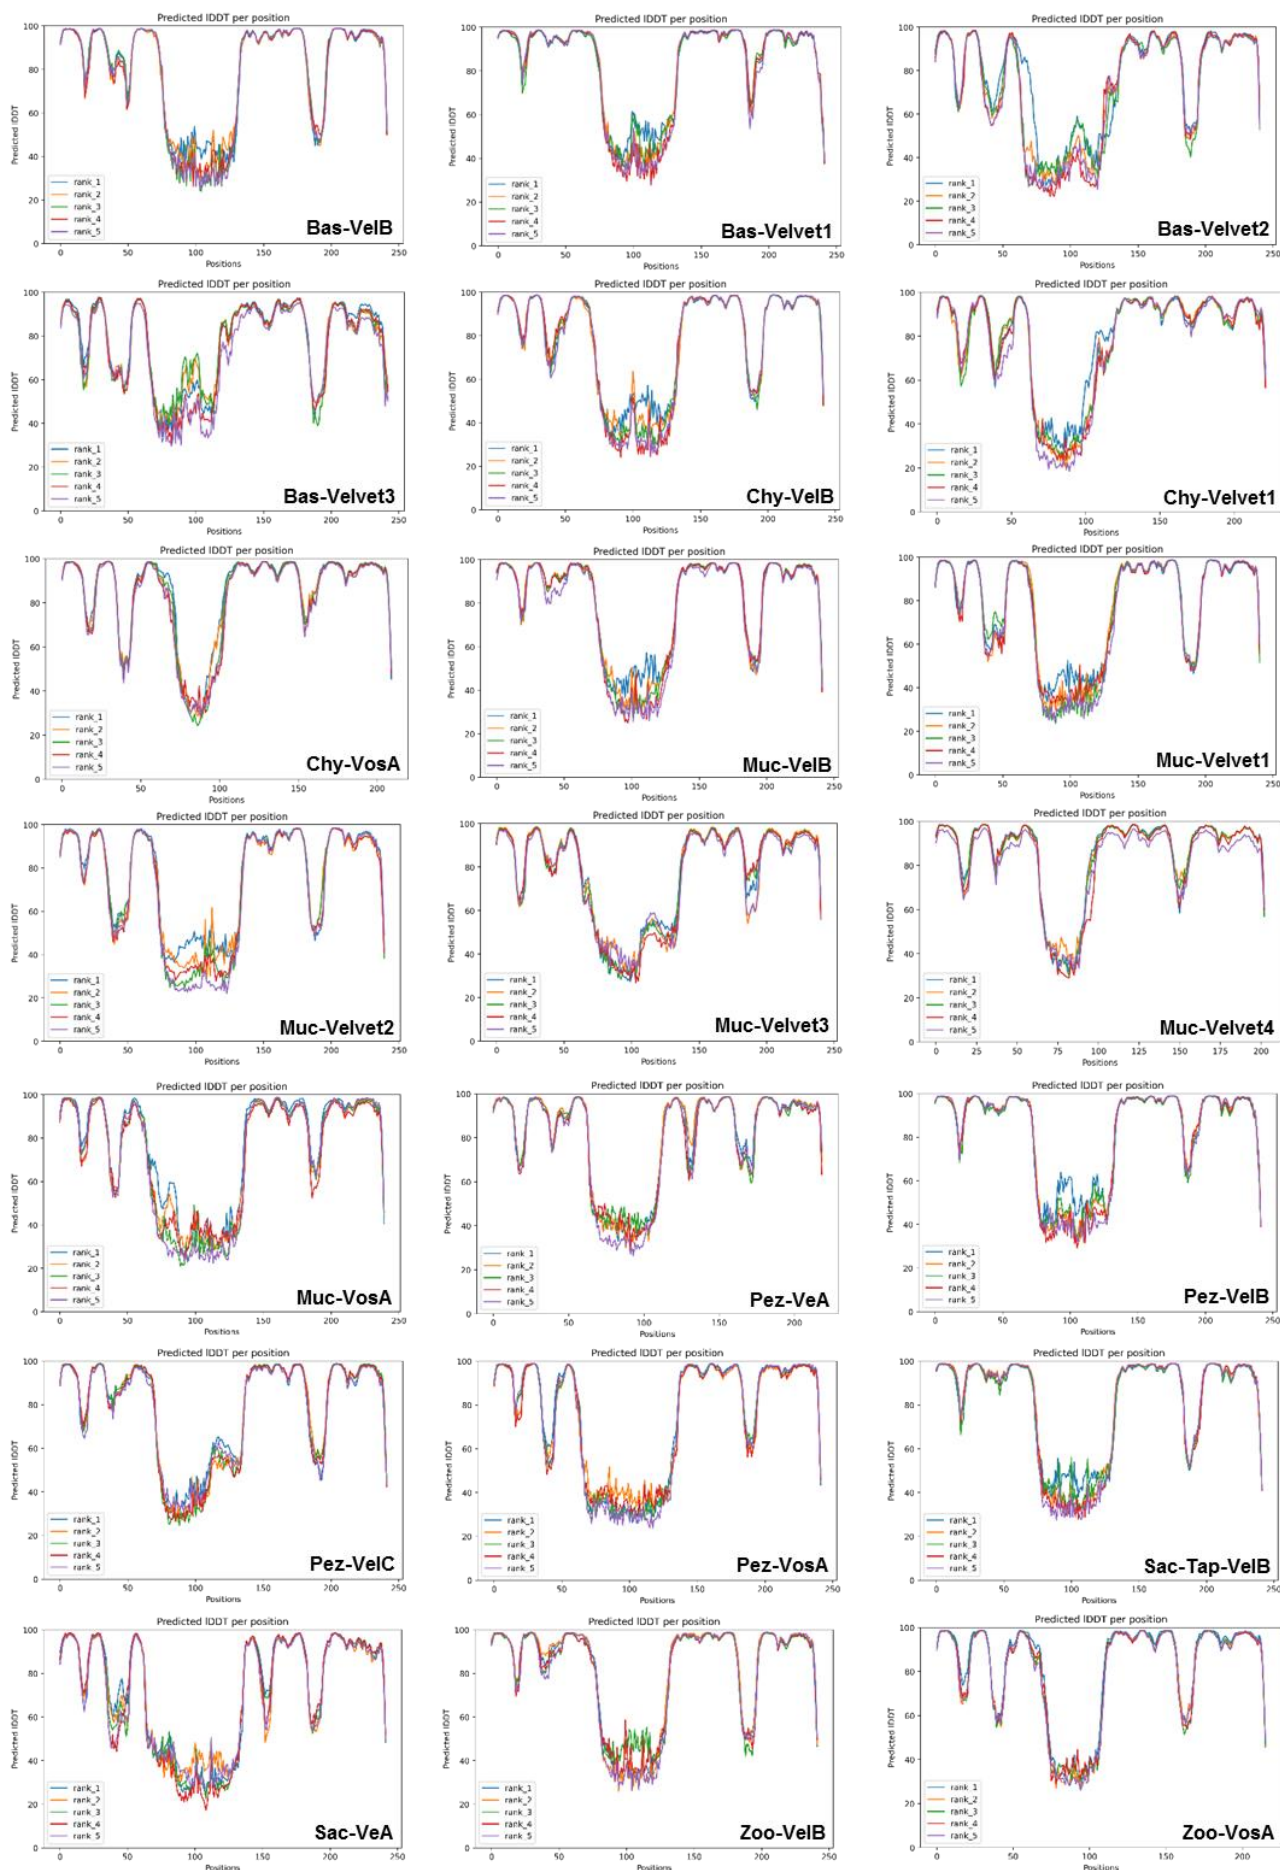

**Fig. S7.** The predicted IDDT-C $\alpha$  score (pLDDT) per residue of the 21 consensus sequences to show their AlphaFold2 confidence measures. pLDDT is between 0

and 100. Model confidence: very high (pLDDT>90), confident (90 > pLDDT > 70), low (70 > pLDDT > 50) and very low (pLDDT < 50).
