# Supplementary material for: Phylogenomics analysis of velvet regulators in the fungal kingdom
Source: PubMed Central journal article supplement (PMC10845976; doi:10.1128/spectrum.03717-23), 2024-01-05
Supplement: spectrum.03717-23-s0002.pdf [file spectrum.03717-23-s0002.pdf]

**Table S1. Summary of functional domains in the 21 velvet clades.** The predicted functional domains except velvet domains of velvet proteins are listed

| Clade                                              | Query                            | Hit type                                   | PSSM-ID     | From   | To  | E-Value  | Bitscore | Accession | Short name               |                        |
|----------------------------------------------------|----------------------------------|--------------------------------------------|-------------|--------|-----|----------|----------|-----------|--------------------------|------------------------|
| Bas-VelB                                           | Naifl1_59590_CE59589_2111        | superfamily                                | 223021      | 305    | 686 | 1.35E-05 | 48.7813  | cl33720   | PHA03247 superfamily     |                        |
|                                                    | Tilco1_3729_transcript_OAJ30042  | superfamily                                | 223021      | 1      | 276 | 0.003518 | 39.9217  | cl33720   | PHA03247 superfamily     |                        |
|                                                    | Psean1_1_83181_PANT_18c00055     | superfamily                                | 223039      | 61     | 299 | 0.002799 | 40.5397  | cl33723   | PHA03307 superfamily     |                        |
|                                                    | Tilwal1_7704_transcript_OAJ18296 | superfamily                                | 223039      | 24     | 221 | 0.002256 | 40.5397  | cl33723   | PHA03307 superfamily     |                        |
|                                                    | Tilco1_3729_transcript_OAJ30042  | superfamily                                | 215130      | 85     | 197 | 9.54E-05 | 44.6948  | cl33436   | PLN02217 superfamily     |                        |
|                                                    | Tilcar1_5938_transcript_OAJ15607 | superfamily                                | 215130      | 90     | 197 | 0.000239 | 43.5392  | cl33436   | PLN02217 superfamily     |                        |
|                                                    | Uroocc1_210673_gm1_3072_g        | superfamily                                | 237057      | 4      | 209 | 0.003188 | 39.4739  | cl36108   | PRK12323 superfamily     |                        |
|                                                    | Naifl1_59590_CE59589_2111        | superfamily                                | 185594      | 225    | 373 | 0.006251 | 40.0584  | cl33180   | PTZ00395 superfamily     |                        |
|                                                    | Mixos1_95822_fgenes1_pm_8_147    | specific                                   | 238958      | 159    | 457 | 1E-109   | 340.242  | cd02000   | TPP_E1_PDC_ADC_BCADC     |                        |
|                                                    | Bas-Velvet1                      | Fomro1_992371_e_gw1_56_80_1                | superfamily | 427171 | 130 | 254      | 0.000985 | 42.061    | cl38111                  | Atrophin-1 superfamily |
|                                                    |                                  | Kocim1_651730_gm1_4356_g                   | superfamily | 455732 | 278 | 371      | 0.000127 | 41.904    | cl42387                  | dermokine superfamily  |
|                                                    |                                  | Trich1_6062_CE6061_4679                    | superfamily | 455861 | 256 | 425      | 0.000698 | 42.5052   | cl42516                  | dnaA superfamily       |
|                                                    |                                  | Crycu1_388151_estExt_fgenes1_pg_C_1_t30268 | superfamily | 455861 | 258 | 462      | 1.28E-05 | 48.2832   | cl42516                  | dnaA superfamily       |
|                                                    |                                  | Triol1_103035_CE103034_993                 | superfamily | 455861 | 253 | 457      | 1.26E-05 | 48.2832   | cl42516                  | dnaA superfamily       |
| Rhitru1_810645_e_gw1_2_1846_1                      |                                  | superfamily                                | 455861      | 123    | 337 | 0.000202 | 44.046   | cl42516   | dnaA superfamily         |                        |
| Crudry1_2802273_fgenes1_pg_27_4_2                  |                                  | superfamily                                | 455861      | 157    | 295 | 2.29E-05 | 47.1276  | cl42516   | dnaA superfamily         |                        |
| SuiFC429_1_1170256_e_gw1_21_9_1                    |                                  | superfamily                                | 455861      | 116    | 322 | 0.003929 | 39.8088  | cl42516   | dnaA superfamily         |                        |
| Amath1_75034_fgenes1_pm_21_29                      |                                  | superfamily                                | 455861      | 159    | 333 | 0.006699 | 39.0384  | cl42516   | dnaA superfamily         |                        |
| Suisub1_1272999_e_gw1_18_152_1                     |                                  | superfamily                                | 455861      | 128    | 321 | 0.004524 | 39.4236  | cl42516   | dnaA superfamily         |                        |
| Suisub1_1565023_e_gw1_1_699_1                      |                                  | superfamily                                | 455861      | 116    | 322 | 0.006542 | 39.0384  | cl42516   | dnaA superfamily         |                        |
| Suilak1_1625909_e_gw1_2_1841_1                     |                                  | superfamily                                | 455861      | 116    | 322 | 0.001273 | 41.3496  | cl42516   | dnaA superfamily         |                        |
| Rhisa1_724461_e_gw1_6_176_1                        |                                  | superfamily                                | 455861      | 123    | 279 | 0.002764 | 40.194   | cl42516   | dnaA superfamily         |                        |
| Suiame1_1069328_MIX49214_1965_32                   |                                  | superfamily                                | 455861      | 129    | 322 | 0.000467 | 42.5052  | cl42516   | dnaA superfamily         |                        |
| Tripop1_2534769_gm1_2547_g                         |                                  | superfamily                                | 455861      | 109    | 265 | 0.001115 | 41.3496  | cl42516   | dnaA superfamily         |                        |
| LacbiCham3_1_103280_fgenes1_pg_33_11               |                                  | superfamily                                | 455861      | 115    | 349 | 4.37E-07 | 52.5204  | cl42516   | dnaA superfamily         |                        |
| LacbiD101_1_897221_MIX48834_163_1_39               |                                  | superfamily                                | 455861      | 115    | 304 | 8.02E-07 | 51.3648  | cl42516   | dnaA superfamily         |                        |
| LacbiN203_1_634321_e_gw1_5_142_1                   |                                  | superfamily                                | 455861      | 115    | 349 | 1.35E-06 | 50.9796  | cl42516   | dnaA superfamily         |                        |
| LacbiS238O_1_124852_fgenes1_pg_2_139               |                                  | superfamily                                | 455861      | 115    | 349 | 4.66E-06 | 49.0536  | cl42516   | dnaA superfamily         |                        |
| Lacbi59489_1_920977_e_gw1_39_65_1                  |                                  | superfamily                                | 455861      | 115    | 349 | 3.94E-07 | 52.5204  | cl42516   | dnaA superfamily         |                        |
| Suiocc1_958472_gm1_11842_g                         |                                  | superfamily                                | 455861      | 116    | 323 | 0.008864 | 38.6532  | cl42516   | dnaA superfamily         |                        |
| Fishe1_72812_gm1_4506_g                            |                                  | superfamily                                | 455861      | 98     | 299 | 0.001253 | 40.9644  | cl42516   | dnaA superfamily         |                        |
| Ustbr1_4655_transcript_SAM77169                    |                                  | superfamily                                | 455861      | 18     | 139 | 0.000469 | 42.5052  | cl42516   | dnaA superfamily         |                        |
| Spore1_3185_sr12445m_01                            |                                  | superfamily                                | 455861      | 2      | 146 | 0.008143 | 38.6532  | cl42516   | dnaA superfamily         |                        |
| Usthor1_81026_UHOR_01729                           |                                  | superfamily                                | 455861      | 18     | 139 | 0.000171 | 44.046   | cl42516   | dnaA superfamily         |                        |
| SerlaS7_3_2_86143_estExt_Genewis_e1_C_41262        |                                  | superfamily                                | 282904      | 112    | 368 | 0.000784 | 42.2108  | cl37540   | Herpes_BLLF1 superfamily |                        |
| Denbi1_958870_estExt_Genemark1_C_1_t10159          |                                  | superfamily                                | 282904      | 108    | 378 | 0.00367  | 39.8996  | cl37540   | Herpes_BLLF1 superfamily |                        |
| Anoalb1_2246155_MIX1989_8492_70                    |                                  | superfamily                                | 282904      | 109    | 349 | 7.24E-05 | 45.6776  | cl37540   | Herpes_BLLF1 superfamily |                        |
| Plucer1_950568_MIX42980_1143_47                    |                                  | superfamily                                | 282904      | 110    | 365 | 0.00264  | 40.2848  | cl37540   | Herpes_BLLF1 superfamily |                        |
| Hydfim1_122796_CE122795_4920                       |                                  | superfamily                                | 282904      | 106    | 344 | 0.001297 | 41.4404  | cl37540   | Herpes_BLLF1 superfamily |                        |
| Amaapr1_3019461_gm1_10019_g                        |                                  | superfamily                                | 282904      | 85     | 269 | 0.002862 | 40.2848  | cl37540   | Herpes_BLLF1 superfamily |                        |
| LacbiH53_1_496399_estExt_fgenes1_pg_C_10204        |                                  | superfamily                                | 282904      | 118    | 359 | 1.14E-05 | 47.9888  | cl37540   | Herpes_BLLF1 superfamily |                        |
| LacbiH70_1_526232_estExt_fgenes1_pg_C_20118        |                                  | superfamily                                | 282904      | 118    | 358 | 5.66E-06 | 49.1444  | cl37540   | Herpes_BLLF1 superfamily |                        |
| LacbiH82_1_420993_estExt_Genewis_e1Plus_C_1_t10386 |                                  | superfamily                                | 282904      | 118    | 359 | 1.09E-05 | 47.9888  | cl37540   | Herpes_BLLF1 superfamily |                        |
| LacbiH82xH70_1_524692_estExt_fgenes1_pm_C_290017   |                                  | superfamily                                | 282904      | 118    | 359 | 1.14E-05 | 47.9888  | cl37540   | Herpes_BLLF1 superfamily |                        |
| Lacbi2_586995_e_gw1_3_9234_1                       |                                  | superfamily                                | 282904      | 118    | 358 | 5.67E-06 | 49.1444  | cl37540   | Herpes_BLLF1 superfamily |                        |
| Cerbo1_2712_transcript_CEH14671                    |                                  | superfamily                                | 282904      | 113    | 411 | 0.001365 | 41.8256  | cl37540   | Herpes_BLLF1 superfamily |                        |
| Mersum1_1115547_fgenes1_pg_2_862                   |                                  | superfamily                                | 183756      | 206    | 324 | 0.000254 | 43.5509  | cl32828   | motB superfamily         |                        |
| Hygaur1_995974_e_gw1_4_168_1                       |                                  | superfamily                                | 130689      | 136    | 249 | 0.000203 | 44.0274  | cl31127   | PABP-1234 superfamily    |                        |
| Diohu1_40973_gm1_3395_g                            |                                  | superfamily                                | 223021      | 165    | 498 | 3.39E-05 | 47.2405  | cl33720   | PHA03247 superfamily     |                        |
| Diocr1_384589_gm1_8902_g                           |                                  | superfamily                                | 223021      | 14     | 457 | 1.01E-06 | 52.2481  | cl33720   | PHA03247 superfamily     |                        |
| Diocr1_385403_gm1_9716_g                           |                                  | superfamily                                | 223021      | 14     | 488 | 4.37E-06 | 50.3221  | cl33720   | PHA03247 superfamily     |                        |
| Papla1_31175_CE31174_7731                          |                                  | superfamily                                | 223021      | 172    | 419 | 0.004112 | 40.3069  | cl33720   | PHA03247 superfamily     |                        |
| CgaCA1873_1_272_transcript_KIR69_173               |                                  | superfamily                                | 223021      | 123    | 366 | 0.009432 | 39.1513  | cl33720   | PHA03247 superfamily     |                        |
| Lenvul1_1067860_gm1_1373_g                         |                                  | superfamily                                | 223021      | 112    | 370 | 0.000198 | 44.1589  | cl33720   | PHA03247 superfamily     |                        |
| Copci1_17752_fgenes1DR_te_pg_Chr_5_593             |                                  | superfamily                                | 223021      | 143    | 312 | 8.43E-05 | 45.3145  | cl33720   | PHA03247 superfamily     |                        |
| Mycreb1_753034_CE753033_3934                       |                                  | superfamily                                | 223021      | 129    | 353 | 4.97E-06 | 49.1665  | cl33720   | PHA03247 superfamily     |                        |
| Treme1_74694_estExt_fgenes1TM_pg_C_130186          |                                  | superfamily                                | 223021      | 56     | 413 | 7.09E-05 | 46.0849  | cl33720   | PHA03247 superfamily     |                        |
| Mycvit1_463514_CE463513_8015                       |                                  | superfamily                                | 223021      | 128    | 315 | 0.002089 | 41.0773  | cl33720   | PHA03247 superfamily     |                        |
| Spalat1_816697_fgenes1_pm_21_2_8                   |                                  | superfamily                                | 223021      | 112    | 414 | 5.54E-05 | 46.4701  | cl33720   | PHA03247 superfamily     |                        |
| Mycfil1_250871_CE250870_3308                       |                                  | superfamily                                | 223021      | 178    | 341 | 0.00404  | 39.9217  | cl33720   | PHA03247 superfamily     |                        |
| Treen1_559038_gm1_3583_g                           |                                  | superfamily                                | 223021      | 10     | 460 | 0.002336 | 41.4625  | cl33720   | PHA03247 superfamily     |                        |
| Anomyc1_1589155_e_gw1_3_1866_1                     |                                  | superfamily                                | 223021      | 136    | 338 | 0.001944 | 41.0773  | cl33720   | PHA03247 superfamily     |                        |
| Hercor1_1045299_gm1_3848_g                         |                                  | superfamily                                | 223021      | 146    | 407 | 4.87E-09 | 59.1817  | cl33720   | PHA03247 superfamily     |                        |
| Dicsqu464_1_955638_estExt_fgenes1_pm_C_70025       |                                  | superfamily                                | 223021      | 119    | 403 | 1.79E-06 | 51.0925  | cl33720   | PHA03247 superfamily     |                        |
| Dicsq1_161205_estExt_fgenes1_pg_C_100189           |                                  | superfamily                                | 223021      | 119    | 403 | 1.79E-06 | 51.0925  | cl33720   | PHA03247 superfamily     |                        |
| Albpec1_1527448_e_gw1_5_147_1                      |                                  | superfamily                                | 223021      | 113    | 431 | 0.000391 | 43.3885  | cl33720   | PHA03247 superfamily     |                        |

|                                                 |             |        |     |     |          |         |         |                      |
|-------------------------------------------------|-------------|--------|-----|-----|----------|---------|---------|----------------------|
| Rusvin1_959169_fgenesh1_pg_4_145                | superfamily | 223021 | 109 | 369 | 0.0037   | 40.3069 | cl33720 | PHA03247 superfamily |
| Leumo1_1054359_estExt_Genewise1 Plus C_00040098 | superfamily | 223021 | 109 | 362 | 5.62E-05 | 46.0849 | cl33720 | PHA03247 superfamily |
| Phchr2_3002211_fgenesh1_pm_2_463                | superfamily | 223021 | 105 | 447 | 9.26E-08 | 55.3297 | cl33720 | PHA03247 superfamily |
| Serbor1_70075_CE70074_7872                      | superfamily | 223021 | 108 | 318 | 1.77E-05 | 47.6257 | cl33720 | PHA03247 superfamily |
| Cligib1_1608310_fgenesh1_pm_2_442               | superfamily | 223021 | 111 | 312 | 5.42E-05 | 45.6997 | cl33720 | PHA03247 superfamily |
| Jaar1_225099_CE12727_973                        | superfamily | 223021 | 114 | 419 | 2.71E-06 | 50.3221 | cl33720 | PHA03247 superfamily |
| Polar1_622243_MIX14193_654_22                   | superfamily | 223021 | 119 | 398 | 0.000176 | 44.5441 | cl33720 | PHA03247 superfamily |
| Polsqu1_736070_gm1_2232_g                       | superfamily | 223021 | 119 | 410 | 5.93E-06 | 49.5517 | cl33720 | PHA03247 superfamily |
| Amylap1_1_847318_MIX17964_2136_22               | superfamily | 223021 | 112 | 368 | 9.13E-05 | 45.3145 | cl33720 | PHA03247 superfamily |
| Rhiso1_2534_g2534_t1                            | superfamily | 223021 | 205 | 478 | 0.003484 | 40.6921 | cl33720 | PHA03247 superfamily |
| Densp1_925963_estExt_Genemark1_C_1_t20071       | superfamily | 223021 | 125 | 409 | 0.003802 | 40.3069 | cl33720 | PHA03247 superfamily |
| Possti1_1293113_fgenesh1_pm_9_51                | superfamily | 223021 | 111 | 395 | 0.000236 | 44.1589 | cl33720 | PHA03247 superfamily |
| Trapub1_3791_scaffold_1479_31_No_Blast_Hit      | superfamily | 223021 | 111 | 350 | 5.25E-08 | 56.1001 | cl33720 | PHA03247 superfamily |
| Pycpun1_518988_estExt_fgenesh1_pm_C_1_t10299    | superfamily | 223021 | 135 | 408 | 1.42E-07 | 54.5593 | cl33720 | PHA03247 superfamily |
| Pycco1_1466085_gm1_3594_g                       | superfamily | 223021 | 111 | 403 | 9.05E-08 | 55.3297 | cl33720 | PHA03247 superfamily |
| Trabet1_734505_e_gw1_30_162_1                   | superfamily | 223021 | 110 | 411 | 1.01E-06 | 51.8629 | cl33720 | PHA03247 superfamily |
| Tragib1_1441534_MIX17121_2300_23                | superfamily | 223021 | 111 | 411 | 1.93E-05 | 47.6257 | cl33720 | PHA03247 superfamily |
| Tramax1_961474_e_gw1_1_3373_1                   | superfamily | 223021 | 111 | 409 | 1.96E-09 | 60.7225 | cl33720 | PHA03247 superfamily |
| Crula1_194471_CE194470_3248                     | superfamily | 223021 | 110 | 360 | 1.71E-05 | 47.6257 | cl33720 | PHA03247 superfamily |
| Cyapal1_123313_CE123312_1855                    | superfamily | 223021 | 116 | 371 | 1.07E-06 | 51.4777 | cl33720 | PHA03247 superfamily |
| Coraus1_820769_e_gw1_66_168_1                   | superfamily | 223021 | 124 | 356 | 2.54E-06 | 50.3221 | cl33720 | PHA03247 superfamily |
| CorKIS3_1_1125032_e_gw1_5_906_1                 | superfamily | 223021 | 118 | 270 | 0.003972 | 39.9217 | cl33720 | PHA03247 superfamily |
| Ruseme1_1798846_gm1_1067_g                      | superfamily | 223021 | 112 | 350 | 5.28E-06 | 49.5517 | cl33720 | PHA03247 superfamily |
| Laesu1_175547_CE175546_5608                     | superfamily | 223021 | 151 | 389 | 5.53E-05 | 46.0849 | cl33720 | PHA03247 superfamily |
| Onnsc1_971022_estExt_Genemark1_C_600012         | superfamily | 223021 | 115 | 375 | 7.21E-07 | 52.2481 | cl33720 | PHA03247 superfamily |
| Gymjun1_1811598_fgenesh1_pm_1_340               | superfamily | 223021 | 116 | 345 | 0.000316 | 43.3885 | cl33720 | PHA03247 superfamily |
| Ganluc1_347232_e_gw1_6_832_1                    | superfamily | 223021 | 119 | 405 | 3.64E-09 | 59.9521 | cl33720 | PHA03247 superfamily |
| Pycsa1_1561522_e_gw1_718000065_0711_72_1        | superfamily | 223021 | 111 | 408 | 1.16E-07 | 54.9445 | cl33720 | PHA03247 superfamily |
| Fibsp1_543990_CE543989_745                      | superfamily | 223021 | 111 | 368 | 0.003003 | 40.6921 | cl33720 | PHA03247 superfamily |
| Cyastr2_1238910_e_gw1_15_222_1                  | superfamily | 223021 | 123 | 271 | 0.00107  | 41.8477 | cl33720 | PHA03247 superfamily |
| Flaf1_1321536_fgenesh1_pg_4_273                 | superfamily | 223021 | 114 | 375 | 5.34E-05 | 46.0849 | cl33720 | PHA03247 superfamily |
| Epityp1_40807_e_gw1_4_603_1                     | superfamily | 223021 | 110 | 306 | 0.000716 | 42.6181 | cl33720 | PHA03247 superfamily |
| Cervir1_2011117_fgenesh1_pm_2_184               | superfamily | 223021 | 100 | 347 | 1.74E-07 | 53.7889 | cl33720 | PHA03247 superfamily |
| Persub1_2854441_fgenesh1_pm_12_251              | superfamily | 223021 | 124 | 409 | 0.000106 | 45.3145 | cl33720 | PHA03247 superfamily |
| Niavib1_997546_e_gw1_12_252_1                   | superfamily | 223021 | 118 | 288 | 3.45E-05 | 46.4701 | cl33720 | PHA03247 superfamily |
| Tralj1_1008738_estExt_Genewise1_C_1_t20331      | superfamily | 223021 | 110 | 407 | 8.04E-07 | 52.2481 | cl33720 | PHA03247 superfamily |
| Cytmel1_1407068_fgenesh1_pm_109_5               | superfamily | 223021 | 106 | 414 | 2.73E-05 | 47.2405 | cl33720 | PHA03247 superfamily |
| Borrad1_1876818_MIX63913_2543_69                | superfamily | 223021 | 117 | 382 | 9.61E-06 | 48.7813 | cl33720 | PHA03247 superfamily |
| Perfra1_266615_CE266614_12390                   | superfamily | 223021 | 163 | 439 | 5.42E-05 | 46.4701 | cl33720 | PHA03247 superfamily |
| Fomfom1_1201309_e_gw1_6_2153_1                  | superfamily | 223021 | 111 | 402 | 5.82E-09 | 59.1817 | cl33720 | PHA03247 superfamily |
| Pycin1_920900_e_gw1_5_416_1                     | superfamily | 223021 | 111 | 404 | 4.69E-07 | 53.0185 | cl33720 | PHA03247 superfamily |
| Traci1_1407726_e_gw1_29_242_1                   | superfamily | 223021 | 145 | 407 | 3.72E-06 | 49.9369 | cl33720 | PHA03247 superfamily |
| Trave1_116956_e_gw1_3_3124_1                    | superfamily | 223021 | 110 | 412 | 1.78E-06 | 51.0925 | cl33720 | PHA03247 superfamily |
| Stehi1_140265_estExt_fgenesh1_pg_C_90406        | superfamily | 223021 | 145 | 271 | 0.002902 | 41.0773 | cl33720 | PHA03247 superfamily |
| Fompi3_1032620_fgenesh1_pm_75_24                | superfamily | 223021 | 110 | 410 | 0.000415 | 43.3885 | cl33720 | PHA03247 superfamily |
| LeugonAS2_1_1860172_e_gw1_336_27_1              | superfamily | 223021 | 141 | 358 | 9.67E-05 | 45.3145 | cl33720 | PHA03247 superfamily |
| Phisub1_2174547_gm1_7691_g                      | superfamily | 223021 | 104 | 354 | 0.006842 | 39.5365 | cl33720 | PHA03247 superfamily |
| Lerer1_982024_e_gw1_13_205_1                    | superfamily | 223021 | 115 | 337 | 2.74E-05 | 46.8553 | cl33720 | PHA03247 superfamily |
| Lerce1_960489_e_gw1_43_148_1                    | superfamily | 223021 | 115 | 345 | 7.24E-07 | 51.8629 | cl33720 | PHA03247 superfamily |
| Trace1_466207_CE466206_9027                     | superfamily | 223021 | 113 | 399 | 0.002872 | 40.6921 | cl33720 | PHA03247 superfamily |
| Leugon1_1374220_fgenesh1_pm_27_6                | superfamily | 223021 | 129 | 359 | 0.002768 | 40.6921 | cl33720 | PHA03247 superfamily |
| Hebvel2_1216527_gm1_6164_g                      | superfamily | 223021 | 114 | 345 | 2.80E-07 | 53.4037 | cl33720 | PHA03247 superfamily |
| Phoaln1_1653877_e_gw1_15_137_1                  | superfamily | 223021 | 111 | 368 | 0.000728 | 42.2329 | cl33720 | PHA03247 superfamily |
| Phohig1_7480_CE7479_3402                        | superfamily | 223021 | 182 | 361 | 2.48E-06 | 50.7073 | cl33720 | PHA03247 superfamily |
| Exigl1_758164_gm1_145_g                         | superfamily | 223021 | 120 | 376 | 5.19E-07 | 52.6333 | cl33720 | PHA03247 superfamily |
| Crafun1_831580_MIX19268_1425_38                 | superfamily | 223021 | 106 | 352 | 0.002177 | 40.6921 | cl33720 | PHA03247 superfamily |
| Psiser1_82643_fgenesh1_pm_99_111                | superfamily | 223021 | 134 | 375 | 0.000192 | 44.1589 | cl33720 | PHA03247 superfamily |
| Pornie1_2_1043763_estExt_Genemark1_C_40178      | superfamily | 223021 | 114 | 367 | 0.004251 | 39.9217 | cl33720 | PHA03247 superfamily |
| Rusdis1_1264899_gm1_2212_g                      | superfamily | 223021 | 215 | 367 | 0.00697  | 39.1513 | cl33720 | PHA03247 superfamily |
| Conapa1_666483_e_gw1_11_85_1                    | superfamily | 223021 | 124 | 361 | 0.000383 | 43.3885 | cl33720 | PHA03247 superfamily |
| Varmin1_85404_gm1_4068_g                        | superfamily | 223021 | 113 | 364 | 5.65E-06 | 49.5517 | cl33720 | PHA03247 superfamily |
| Copci1_1148_CC1G_01332T0                        | superfamily | 223021 | 43  | 212 | 0.000121 | 44.1589 | cl33720 | PHA03247 superfamily |
| Copci_AmutBmut1_365674_e_gw1_49_72_1            | superfamily | 223021 | 43  | 212 | 1.28E-05 | 47.2405 | cl33720 | PHA03247 superfamily |
| Copmar1_599891_e_gw1_158_41_1                   | superfamily | 223021 | 47  | 232 | 1.12E-05 | 47.6257 | cl33720 | PHA03247 superfamily |
| Pycci1_9528_scf185015_g89                       | superfamily | 223021 | 7   | 294 | 4.98E-06 | 49.1665 | cl33720 | PHA03247 superfamily |

|                                                 |             |        |      |      |          |         |         |            |             |
|-------------------------------------------------|-------------|--------|------|------|----------|---------|---------|------------|-------------|
| Rhoba1_1_51058_estExt_Genemark1_C_1_t20221      | superfamily | 223021 | 116  | 240  | 0.001126 | 41.0773 | cl33720 | PHA03247   | superfamily |
| Spoli1_198007_gm1_2903_g                        | superfamily | 223021 | 156  | 428  | 1.50E-10 | 64.1893 | cl33720 | PHA03247   | superfamily |
| CgaWM276_1_488_transcript_ADV19817              | superfamily | 165527 | 243  | 389  | 0.000326 | 43.1784 | cl29788 | PHA03269   | superfamily |
| Schco2251_1_201178_e_gw1_6_266_1                | superfamily | 223039 | 103  | 415  | 2.50E-05 | 47.0881 | cl33723 | PHA03307   | superfamily |
| SchcoUNK_1_80868_fgenes1_pm_3_2_48              | superfamily | 223039 | 103  | 415  | 3.90E-05 | 46.7029 | cl33723 | PHA03307   | superfamily |
| SchcoZB2_119624_gm1_10660_g                     | superfamily | 223039 | 106  | 415  | 5.08E-06 | 49.3993 | cl33723 | PHA03307   | superfamily |
| Schco2231_1_286364_gm1_1083_g                   | superfamily | 223039 | 103  | 414  | 0.002969 | 40.5397 | cl33723 | PHA03307   | superfamily |
| Schrad1_233334_gm1_11449_g                      | superfamily | 223039 | 114  | 342  | 1.71E-06 | 50.9401 | cl33723 | PHA03307   | superfamily |
| Schrad1_97742_e_gw1_1066_4_1                    | superfamily | 223039 | 106  | 417  | 2.25E-05 | 47.4733 | cl33723 | PHA03307   | superfamily |
| Stepol1_72792_gm1_4005_g                        | superfamily | 223039 | 187  | 443  | 6.86E-05 | 45.9325 | cl33723 | PHA03307   | superfamily |
| Cryne_H99_1_488_CNAG_00564T0                    | superfamily | 223039 | 101  | 315  | 0.002651 | 40.9249 | cl33723 | PHA03307   | superfamily |
| Mycpur1_612267_MIX30984_1_4                     | superfamily | 223039 | 102  | 372  | 1.42E-05 | 47.8585 | cl33723 | PHA03307   | superfamily |
| Rhodsp1_298602_gm1_2810_g                       | superfamily | 223039 | 14   | 303  | 2.09E-05 | 47.8585 | cl33723 | PHA03307   | superfamily |
| Tilco1_2241_transcript_OAJ08835                 | superfamily | 223039 | 57   | 311  | 0.000831 | 42.0805 | cl33723 | PHA03307   | superfamily |
| Skebig1_395698_CE395697_12679                   | superfamily | 223061 | 137  | 236  | 0.00056  | 42.6789 | cl25753 | PHA03369   | superfamily |
| Cyaste1_240823_gm4_16508_g                      | superfamily | 223065 | 114  | 244  | 4.13E-05 | 46.2136 | cl33729 | PHA03378   | superfamily |
| Ompol1_5503_MUSTwsD_GLEAN_10_003413             | superfamily | 223065 | 50   | 150  | 0.006293 | 38.5096 | cl33729 | PHA03378   | superfamily |
| Glocon1_677921_CE677920_8110                    | superfamily | 215130 | 240  | 360  | 0.00421  | 39.6872 | cl33436 | PLN02217   | superfamily |
| Chrvin1_2460327_e_gw1_6_547_1                   | superfamily | 178748 | 122  | 240  | 0.000391 | 42.9911 | cl25752 | PLN03209   | superfamily |
| Antsi1_720013_fgenes1_pm_19_5                   | superfamily | 178748 | 147  | 359  | 0.00799  | 39.1391 | cl25752 | PLN03209   | superfamily |
| Schco_TatD_1_277283_estExt_Genewise1_C_2330009  | superfamily | 236090 | 173  | 398  | 8.36E-05 | 45.3621 | cl35613 | PRK07764   | superfamily |
| Mycsan1_212082_CE212081_4619                    | superfamily | 236090 | 131  | 322  | 0.000206 | 43.8213 | cl35613 | PRK07764   | superfamily |
| Cryam1_9298_ODN76812                            | superfamily | 236090 | 216  | 366  | 0.004591 | 39.9693 | cl35613 | PRK07764   | superfamily |
| Cryam1_9299_ODN76813                            | superfamily | 236090 | 216  | 366  | 0.004591 | 39.9693 | cl35613 | PRK07764   | superfamily |
| Polbr1_1431927_estExt_Genewise1Plus_C_8_t20203  | superfamily | 236090 | 149  | 329  | 0.008493 | 38.8137 | cl35613 | PRK07764   | superfamily |
| Bolvit1_73438_CE73437_5154                      | superfamily | 236090 | 80   | 256  | 1.15E-06 | 50.7549 | cl35613 | PRK07764   | superfamily |
| Gansi1_1032_transcript_PIL37344                 | superfamily | 236090 | 130  | 338  | 1.39E-08 | 57.6885 | cl35613 | PRK07764   | superfamily |
| Leisp1_1430809_estExt_Genemark1_C_50224         | superfamily | 236090 | 99   | 315  | 7.50E-05 | 45.3621 | cl35613 | PRK07764   | superfamily |
| Hypsu1_238534_CE17528_15200                     | superfamily | 236090 | 97   | 266  | 0.000181 | 43.8213 | cl35613 | PRK07764   | superfamily |
| Rusoch1_623378_e_gw1_3_1790_1                   | superfamily | 236090 | 136  | 351  | 0.002706 | 40.3545 | cl35613 | PRK07764   | superfamily |
| Creces1_1129101_gm1_269_g                       | superfamily | 236090 | 136  | 360  | 0.001765 | 41.1249 | cl35613 | PRK07764   | superfamily |
| Mycgal1_988641_CE988640_1782                    | superfamily | 236090 | 130  | 367  | 4.11E-05 | 46.1325 | cl35613 | PRK07764   | superfamily |
| Pycful1_2588213_e_gw1_5_739_1                   | superfamily | 236138 | 154  | 287  | 0.000708 | 42.1602 | cl35634 | PRK07994   | superfamily |
| Ganleu1_656308_CE656307_8618                    | superfamily | 236333 | 117  | 337  | 6.80E-08 | 55.0998 | cl35739 | PRK08691   | superfamily |
| TerJ132_1_5215_transcript_KNZ77203              | superfamily | 236333 | 126  | 327  | 0.000139 | 44.3142 | cl35739 | PRK08691   | superfamily |
| Panpap1_1334481_e_gw1_1_2267_1                  | superfamily | 236333 | 103  | 345  | 0.000649 | 42.3882 | cl35739 | PRK08691   | superfamily |
| lrplac1_1594977_gm1_8647_g                      | superfamily | 236333 | 70   | 222  | 4.57E-05 | 45.855  | cl35739 | PRK08691   | superfamily |
| Mycalb1_947558_gm1_1122_g                       | superfamily | 236669 | 131  | 286  | 1.36E-06 | 51.2391 | cl35903 | PRK10263   | superfamily |
| Corsan1_1_2852071_MIX178957_5377_95             | superfamily | 236669 | 137  | 328  | 2.45E-06 | 50.0835 | cl35903 | PRK10263   | superfamily |
| Hydpi2_79354_e_gw1_1_862_1                      | superfamily | 236669 | 235  | 349  | 0.004178 | 40.0683 | cl35903 | PRK10263   | superfamily |
| Rhivul1_670292_e_gw1_1_522_1                    | superfamily | 236669 | 142  | 342  | 0.002728 | 40.4535 | cl35903 | PRK10263   | superfamily |
| Phlrad1_156433_minus_g12884_t1                  | superfamily | 236669 | 126  | 278  | 0.009318 | 38.9127 | cl35903 | PRK10263   | superfamily |
| Lepmol1_2344755_fgenes1_pg_2_2_43               | superfamily | 236669 | 146  | 288  | 0.000984 | 41.9943 | cl35903 | PRK10263   | superfamily |
| Cysmur1_882604_CE882603_11298                   | superfamily | 236669 | 152  | 334  | 0.001885 | 40.8387 | cl35903 | PRK10263   | superfamily |
| Psicub1_1_30911_e_gw1_1085_51_1                 | superfamily | 236669 | 222  | 333  | 0.001923 | 40.8387 | cl35903 | PRK10263   | superfamily |
| Galinc1_732502_CE732501_4080                    | superfamily | 236669 | 274  | 445  | 0.00085  | 42.3795 | cl35903 | PRK10263   | superfamily |
| Pirin1_72802_mRNA_PIIN_02008                    | superfamily | 236669 | 133  | 301  | 0.004486 | 39.6831 | cl35903 | PRK10263   | superfamily |
| Xenvag1_1828531_gm1_4803_g                      | superfamily | 237057 | 166  | 372  | 0.002907 | 41.0147 | cl36108 | PRK12323   | superfamily |
| Lepnud1_1161222_e_gw1_23_119_1                  | superfamily | 237057 | 117  | 334  | 0.000668 | 42.1703 | cl36108 | PRK12323   | superfamily |
| Gansp1_41937_e_gw1_2_1914_1                     | superfamily | 237057 | 111  | 292  | 4.75E-05 | 46.0223 | cl36108 | PRK12323   | superfamily |
| Wolco1_131571_estExt_fgenes1_pm_C_4_t10119      | superfamily | 237057 | 130  | 350  | 0.000136 | 44.8667 | cl36108 | PRK12323   | superfamily |
| Lacbi55996_1_959084_e_gw1_1_101_1               | superfamily | 184281 | 136  | 242  | 7.14E-07 | 51.3623 | cl42933 | PRK13729   | superfamily |
| Fomros1_171720_CE171719_3257                    | superfamily | 237864 | 143  | 229  | 0.000194 | 44.03   | cl36446 | PRK14950   | superfamily |
| Pospl1_129507_estExt_fgenes1_pg_C_500065        | superfamily | 184923 | 237  | 374  | 0.001    | 41.9743 | cl33044 | PRK14959   | superfamily |
| Mycpol1_1314676_gm1_2130_g                      | superfamily | 184923 | 151  | 295  | 0.000401 | 43.1299 | cl33044 | PRK14959   | superfamily |
| Corgl3_7132530_estExt_Genewise1_C_257_t10021    | superfamily | 184923 | 142  | 254  | 0.000452 | 42.7447 | cl33044 | PRK14959   | superfamily |
| Corcam1_550669_e_gw1_4_729_1                    | superfamily | 184923 | 92   | 276  | 0.00109  | 41.2039 | cl33044 | PRK14959   | superfamily |
| Coppel1_470004_e_gw1_22_91_1                    | superfamily | 184923 | 80   | 174  | 0.000785 | 41.2039 | cl33044 | PRK14959   | superfamily |
| Volvo1_111900_nucleoside                        | superfamily | 185594 | 121  | 326  | 0.000231 | 43.9103 | cl33180 | PTZ00395   | superfamily |
| MroMCA2997_1_5809_Moror_13896                   | superfamily | 185594 | 134  | 323  | 0.00012  | 44.6807 | cl33180 | PTZ00395   | superfamily |
| Paxam1_1030044_MIX11864_1269_2_4                | superfamily | 185594 | 174  | 320  | 1.17E-05 | 48.1475 | cl33180 | PTZ00395   | superfamily |
| Amysub1_4614752_gm1_2586_g                      | superfamily | 185594 | 223  | 411  | 0.001747 | 41.5991 | cl33180 | PTZ00395   | superfamily |
| Theter1_1012593_e_gw1_17_52_1                   | superfamily | 227709 | 121  | 392  | 0.000982 | 41.8003 | cl34999 | ROM1       | superfamily |
| Resbic1_1200123_estExt_Genemark1_C_4_t10384     | superfamily | 227709 | 119  | 354  | 2.05E-05 | 47.1931 | cl34999 | ROM1       | superfamily |
| Agabi_varbur_1_113120_estExt_fgenes1_kg_C_50088 | superfamily | 227709 | 207  | 378  | 0.001003 | 41.8003 | cl34999 | ROM1       | superfamily |
| Anobom1_1211083_e_gw1_83_1_1                    | superfamily | 425992 | 161  | 250  | 0.00888  | 38.3998 | cl03073 | TYA        | superfamily |
| Bas-Velvet2                                     |             |        |      |      |          |         |         |            |             |
| Pospl1_127743_estExt_fgenes1_pg_C_460027        | superfamily | 427171 | 1584 | 1973 | 0.008144 | 41.2906 | cl38111 | Atrophin-1 | superfamily |
| Lened1_2737_LENED_012286                        | superfamily | 427171 | 769  | 1028 | 0.000522 | 44.7574 | cl38111 | Atrophin-1 | superfamily |
| Lened1_2736_LENED_012287                        | superfamily | 427171 | 769  | 1028 | 0.000335 | 45.1426 | cl38111 | Atrophin-1 | superfamily |
| LeuB17_3_135991_GENE07118_1                     | superfamily | 427171 | 618  | 772  | 0.00366  | 40.9054 | cl38111 | Atrophin-1 | superfamily |
| Sclyun1_2006976_gm4_5516_g                      | superfamily | 455732 | 663  | 834  | 0.008431 | 39.5976 | cl42387 | dermokine  | superfamily |

|                                                |             |        |      |      |          |         |           |                          |
|------------------------------------------------|-------------|--------|------|------|----------|---------|-----------|--------------------------|
| Posp1_127743_estExt_fgenes3_pg_C_460027        | superfamily | 455732 | 1826 | 2017 | 0.006493 | 41.1384 | cl42387   | dermokine superfamily    |
| Lened1_2737_LENED_012286                       | superfamily | 455861 | 960  | 1137 | 0.008894 | 40.5792 | cl42516   | dnaA superfamily         |
| Lened1_2736_LENED_012287                       | superfamily | 455861 | 960  | 1137 | 0.008718 | 40.5792 | cl42516   | dnaA superfamily         |
| Lentinedodes1_10281_LE01Gene05754_t1           | superfamily | 455861 | 950  | 1127 | 0.007644 | 40.5792 | cl42516   | dnaA superfamily         |
| Chrvin1_2037576_CE2037575_10688                | superfamily | 455861 | 365  | 602  | 7.75E-08 | 55.9871 | cl42516   | dnaA superfamily         |
| Cysmur1_1282261_gm1_5977_g                     | superfamily | 455861 | 338  | 466  | 0.00051  | 42.5052 | cl42516   | dnaA superfamily         |
| Suiqui1_928227_estExt_Genemark1_C_9_t10020     | superfamily | 455861 | 363  | 535  | 3.13E-05 | 47.1276 | cl42516   | dnaA superfamily         |
| Pismi2_4495247_gm1_10285_g                     | superfamily | 455861 | 548  | 730  | 0.000396 | 44.046  | cl42516   | dnaA superfamily         |
| Pismi2_4495596_gm1_10634_g                     | superfamily | 455861 | 548  | 730  | 0.000396 | 44.046  | cl42516   | dnaA superfamily         |
| Paxam1_983512_fgenes1_pg_171_7                 | superfamily | 455861 | 616  | 819  | 0.000125 | 45.5868 | cl42516   | dnaA superfamily         |
| Suilak1_1189890_CE1189889_11290                | superfamily | 436069 | 211  | 532  | 0.009935 | 39.1296 | cl39316   | DUF5585 superfamily      |
| Pismar1_3058664_estExt_Genewise1_C_310038      | superfamily | 282904 | 265  | 508  | 0.000569 | 42.9812 | cl37540   | Herpes_BLLF1 superfamily |
| Cyaste1_172897_fgenes1_pg_2_70_2               | specific    | 433309 | 257  | 307  | 0.006761 | 34.8111 | pfam13560 | HTH_31                   |
| Suifus1_986343_fgenes1_pg_114_1_5              | superfamily | 430088 | 461  | 685  | 0.001639 | 41.7393 | cl25816   | KAR9 superfamily         |
| Posp1_104508_fgenes3_pg_64_29                  | superfamily | 237030 | 737  | 821  | 0.001158 | 42.9554 | cl36091   | kgd superfamily          |
| Aphpse1_56533_CE56532_1964                     | superfamily | 425360 | 419  | 522  | 0.001985 | 41.1826 | cl41729   | KLF1_2_4_N superfamily   |
| Ompol1_6403_MUStwsD_GLEAN_10_002796            | superfamily | 425360 | 395  | 461  | 0.001983 | 41.1826 | cl41729   | KLF1_2_4_N superfamily   |
| Rhiso1_607_transcript_EUC54060                 | superfamily | 425360 | 282  | 392  | 3.45E-07 | 53.509  | cl41729   | KLF1_2_4_N superfamily   |
| Rhoto_IFO1236_1_45954_mRNA_14_16               | superfamily | 452895 | 66   | 435  | 3.79E-43 | 163.279 | cl28910   | MFS superfamily          |
| Sporo1_31687_estExt_fgenes1_pg_C_20107         | superfamily | 452895 | 279  | 689  | 3.85E-78 | 262.125 | cl28910   | MFS superfamily          |
| Rhiso1_7439_g7439_t1                           | superfamily | 401645 | 274  | 403  | 0.0012   | 43.1008 | cl37801   | PAT1 superfamily         |
| Pirin1_78153_mRNA_PIIN_07346                   | superfamily | 401645 | 528  | 693  | 7.63E-05 | 46.1824 | cl37801   | PAT1 superfamily         |
| LboTFB7829_1_340207_CE340206_2_0846            | superfamily | 401645 | 322  | 458  | 3.36E-05 | 47.7232 | cl37801   | PAT1 superfamily         |
| Amamu1_24595_estExt_Genemark1_C_290019         | superfamily | 401645 | 493  | 641  | 0.003042 | 41.1748 | cl37801   | PAT1 superfamily         |
| Thega1_1814795_CE1814794_5202                  | superfamily | 401645 | 452  | 527  | 8.53E-05 | 45.7972 | cl37801   | PAT1 superfamily         |
| Thacu1_134709_CE134708_7655                    | superfamily | 401645 | 189  | 273  | 0.000313 | 44.6416 | cl37801   | PAT1 superfamily         |
| Leisp1_1312433_estExt_Genewise1PI us C_1480004 | superfamily | 226193 | 323  | 424  | 0.00769  | 39.0897 | cl43925   | PcoB superfamily         |
| Mychae1_120655_CE120654_2315                   | superfamily | 223020 | 200  | 294  | 0.002944 | 40.345  | cl33719   | PHA03246 superfamily     |
| Sismus1_1194206_CE1194205_3237_3               | superfamily | 223021 | 532  | 788  | 3.34E-05 | 47.6257 | cl33720   | PHA03247 superfamily     |
| Tulinq1_1669787_gm1_18548_g                    | superfamily | 223021 | 290  | 814  | 2.79E-13 | 74.2044 | cl33720   | PHA03247 superfamily     |
| Sebbe1_816047_gm1_6487_g                       | superfamily | 223021 | 399  | 887  | 1.27E-07 | 56.1001 | cl33720   | PHA03247 superfamily     |
| Conol1_795459_gw1_329_10_1                     | superfamily | 223021 | 269  | 546  | 6.81E-11 | 65.73   | cl33720   | PHA03247 superfamily     |
| Pirin1_78153_mRNA_PIIN_07346                   | superfamily | 223021 | 334  | 606  | 1.57E-08 | 58.7965 | cl33720   | PHA03247 superfamily     |
| Niavib1_182722_CE182721_6749                   | superfamily | 223021 | 336  | 683  | 4.66E-05 | 47.2405 | cl33720   | PHA03247 superfamily     |
| Conpu1_168681_estExt_Genemark1_C_130391        | superfamily | 223021 | 246  | 542  | 2.68E-06 | 50.7073 | cl33720   | PHA03247 superfamily     |
| LacbiN203_1_486613_CE486612_71_73              | superfamily | 223021 | 313  | 529  | 2.68E-05 | 47.2405 | cl33720   | PHA03247 superfamily     |
| LacbiS238N_1_509427_fgenes1_pg_9_194           | superfamily | 223021 | 400  | 617  | 0.001923 | 42.2329 | cl33720   | PHA03247 superfamily     |
| LacbiH70_1_172399_CE172398_354_7               | superfamily | 223021 | 313  | 530  | 0.001876 | 41.8477 | cl33720   | PHA03247 superfamily     |
| LacbiH82_1_200880_CE200879_249_5               | superfamily | 223021 | 313  | 530  | 0.001876 | 41.8477 | cl33720   | PHA03247 superfamily     |
| LacbiH82xH70_1_14547_CE14546_4_054             | superfamily | 223021 | 313  | 530  | 0.001876 | 41.8477 | cl33720   | PHA03247 superfamily     |
| LacbiS238O_1_163330_gm1_11450_g                | superfamily | 223021 | 298  | 515  | 0.003282 | 41.4625 | cl33720   | PHA03247 superfamily     |
| Lened1_2737_LENED_012286                       | superfamily | 223021 | 357  | 430  | 0.008835 | 40.6921 | cl33720   | PHA03247 superfamily     |
| Lened1_2736_LENED_012287                       | superfamily | 223021 | 357  | 430  | 0.007699 | 41.0773 | cl33720   | PHA03247 superfamily     |
| Lacbi2_448047_gm1_12491_g                      | superfamily | 223021 | 313  | 530  | 0.00356  | 41.0773 | cl33720   | PHA03247 superfamily     |
| Suisib1_719026_CE719025_9762                   | superfamily | 223021 | 272  | 676  | 2.74E-11 | 67.656  | cl33720   | PHA03247 superfamily     |
| Suiplo1_55650_CE55649_9389                     | superfamily | 223021 | 203  | 514  | 0.000146 | 45.6997 | cl33720   | PHA03247 superfamily     |
| Suisib1_2279997_estExt_fgenes1_pg_C_240070     | superfamily | 223021 | 272  | 676  | 4.96E-11 | 66.8856 | cl33720   | PHA03247 superfamily     |
| Suitom1_781148_gm1_14773_g                     | superfamily | 223021 | 203  | 623  | 4.98E-07 | 53.7889 | cl33720   | PHA03247 superfamily     |
| Suifus1_986343_fgenes1_pg_114_1_5              | superfamily | 223021 | 253  | 572  | 6.59E-07 | 53.4037 | cl33720   | PHA03247 superfamily     |
| Paxin1_101260_estExt_Genemark1_C_430009        | superfamily | 223021 | 572  | 864  | 0.000141 | 46.0849 | cl33720   | PHA03247 superfamily     |
| Suisub1_1925720_gm1_13052_g                    | superfamily | 223021 | 203  | 526  | 4.34E-07 | 53.7889 | cl33720   | PHA03247 superfamily     |
| PhIFC14_2_1988220_MIX17022_169_14_77           | superfamily | 223021 | 224  | 638  | 2.29E-07 | 54.9445 | cl33720   | PHA03247 superfamily     |
| Suivis2_1552108_fgenes1_pg_248_17              | superfamily | 223021 | 337  | 648  | 6.49E-08 | 56.4853 | cl33720   | PHA03247 superfamily     |
| Suiploc1_161061_CE161060_12586                 | superfamily | 223021 | 203  | 515  | 2.17E-07 | 54.9445 | cl33720   | PHA03247 superfamily     |
| Suipse1_665534_CE665533_3791                   | superfamily | 223021 | 203  | 656  | 2.53E-07 | 54.5593 | cl33720   | PHA03247 superfamily     |
| SuifC429_1_1362418_gm1_8783_g                  | superfamily | 223021 | 203  | 507  | 2.36E-07 | 54.5593 | cl33720   | PHA03247 superfamily     |
| Suipic1_1461634_estExt_fgenes1_pg_C_1140004    | superfamily | 223021 | 272  | 639  | 8.94E-10 | 62.6485 | cl33720   | PHA03247 superfamily     |
| Suisuba1_223969_MIX26747_69_39                 | superfamily | 223021 | 224  | 666  | 4.67E-08 | 57.2557 | cl33720   | PHA03247 superfamily     |
| Suibov1_752028_CE752027_17150                  | superfamily | 223021 | 324  | 715  | 1.02E-06 | 53.0185 | cl33720   | PHA03247 superfamily     |
| Suisu1_697657_estExt_Genewise1PI us_C_120022   | superfamily | 223021 | 267  | 505  | 8.71E-06 | 48.7813 | cl33720   | PHA03247 superfamily     |
| Suisub1_717628_CE717627_6986                   | superfamily | 223021 | 247  | 676  | 5.72E-10 | 63.4189 | cl33720   | PHA03247 superfamily     |
| Suicli1_571473_CE571472_1840                   | superfamily | 223021 | 224  | 579  | 4.85E-10 | 63.0337 | cl33720   | PHA03247 superfamily     |

|                                                    |             |        |     |      |          |         |         |          |             |
|----------------------------------------------------|-------------|--------|-----|------|----------|---------|---------|----------|-------------|
| Suielb1_1095410_fgenesh1_pg_118_7                  | superfamily | 223021 | 337 | 648  | 1.49E-07 | 55.3297 | cl33720 | PHA03247 | superfamily |
| Suiocc1_970829_estExt_Genemark1_C_1100015          | superfamily | 223021 | 265 | 626  | 3.18E-06 | 51.0925 | cl33720 | PHA03247 | superfamily |
| Suipal1_1050696_e_gw1_16_280_1                     | superfamily | 223021 | 228 | 547  | 4.14E-07 | 53.4037 | cl33720 | PHA03247 | superfamily |
| Auramp1_569146_gm1_6541_g                          | superfamily | 223021 | 538 | 762  | 0.002683 | 41.8477 | cl33720 | PHA03247 | superfamily |
| Botbo1_177452_gm1_8987_g                           | superfamily | 223021 | 258 | 732  | 0.000338 | 44.5441 | cl33720 | PHA03247 | superfamily |
| Schrad1_77061_e_gw1_268_33_1                       | superfamily | 223021 | 261 | 745  | 4.02E-07 | 54.5593 | cl33720 | PHA03247 | superfamily |
| SchcoUNK_1_43169_e_gw1_39_53_1                     | superfamily | 223021 | 261 | 737  | 8.45E-06 | 49.9369 | cl33720 | PHA03247 | superfamily |
| SchcoZB2_52085_e_gw1_50_31_1                       | superfamily | 223021 | 219 | 635  | 0.001298 | 43.0033 | cl33720 | PHA03247 | superfamily |
| Schrad1_73154_e_gw1_183_45_1                       | superfamily | 223021 | 261 | 739  | 0.000295 | 44.9293 | cl33720 | PHA03247 | superfamily |
| Daegu1_321421_CE321420_4888                        | superfamily | 223021 | 278 | 694  | 0.002922 | 41.4625 | cl33720 | PHA03247 | superfamily |
| Suipunc1_52268_CE52267_7866                        | superfamily | 223021 | 200 | 509  | 4.5E-05  | 47.2405 | cl33720 | PHA03247 | superfamily |
| Kurarg1_117906_CE117905_3182                       | superfamily | 223021 | 397 | 682  | 5.26E-07 | 53.7889 | cl33720 | PHA03247 | superfamily |
| Jaar1_70879_estExt_fgenesh1_pm_C_150131            | superfamily | 223021 | 353 | 693  | 1.68E-08 | 58.4113 | cl33720 | PHA03247 | superfamily |
| Cyto1_366949_estExt_Genewise1_C_100108             | superfamily | 223021 | 245 | 507  | 4.78E-08 | 56.8705 | cl33720 | PHA03247 | superfamily |
| Tuisp419_1_1324975_CE1324974_35255                 | superfamily | 223021 | 438 | 619  | 9.29E-05 | 46.4701 | cl33720 | PHA03247 | superfamily |
| Panst_LUM_1_1_870624_CE870623_1779                 | superfamily | 223021 | 250 | 425  | 0.000172 | 44.1589 | cl33720 | PHA03247 | superfamily |
| Mycmet1_1688523_estExt_fgenesh1_pg_C_360034        | superfamily | 223021 | 204 | 440  | 0.004399 | 39.5365 | cl33720 | PHA03247 | superfamily |
| LacbiDR170_1_1070519_estExt_fgenesh1_pg_C_12030001 | superfamily | 223021 | 400 | 617  | 0.000943 | 43.0033 | cl33720 | PHA03247 | superfamily |
| LedB17_3_135991_GENE07118_1                        | superfamily | 223021 | 206 | 279  | 0.008819 | 39.9217 | cl33720 | PHA03247 | superfamily |
| Slotsu1_479308_CE479307_6125                       | superfamily | 223021 | 254 | 411  | 1.7E-06  | 50.7073 | cl33720 | PHA03247 | superfamily |
| Rhoba1_1_42518_gm1_2083_g                          | superfamily | 223021 | 208 | 415  | 0.001302 | 41.8477 | cl33720 | PHA03247 | superfamily |
| Rhoglu91_1_39000_gm1_1370_g                        | superfamily | 223021 | 193 | 507  | 0.000603 | 42.6181 | cl33720 | PHA03247 | superfamily |
| Rhoto_IFO0880_4_15761_CE720556_7022_mRNA           | superfamily | 223021 | 174 | 488  | 0.00058  | 42.6181 | cl33720 | PHA03247 | superfamily |
| Sporo1_31687_estExt_fgenesh1_pg_C_20107            | superfamily | 223021 | 914 | 1059 | 7.78E-05 | 47.2405 | cl33720 | PHA03247 | superfamily |
| Mereb1_352854_gm1_1776_g                           | superfamily | 223021 | 157 | 419  | 3.15E-05 | 49.9369 | cl33720 | PHA03247 | superfamily |
| Hethyg1_462811_estExt_fgenesh1_pg_C_100129         | superfamily | 223021 | 403 | 820  | 1.09E-06 | 52.6333 | cl33720 | PHA03247 | superfamily |
| Moean1_1021_ma_PAN0_002c1030                       | superfamily | 223021 | 291 | 616  | 0.000206 | 44.9293 | cl33720 | PHA03247 | superfamily |
| Moeaph1_2229_PaG_05153T0                           | superfamily | 223021 | 292 | 618  | 0.001156 | 42.6181 | cl33720 | PHA03247 | superfamily |
| Psean1_1_80251_PANT_7c00294                        | superfamily | 223021 | 292 | 618  | 0.000254 | 44.9293 | cl33720 | PHA03247 | superfamily |
| Pseff1_2417_ma_PFL1_04961                          | superfamily | 223021 | 301 | 780  | 1.61E-08 | 58.7965 | cl33720 | PHA03247 | superfamily |
| Tescy1_86388_CE86387_10361                         | superfamily | 223021 | 328 | 788  | 5.3E-06  | 50.3221 | cl33720 | PHA03247 | superfamily |
| Ustbr1_4410_transcript_SAM75730                    | superfamily | 223021 | 436 | 850  | 1.71E-06 | 52.2481 | cl33720 | PHA03247 | superfamily |
| Tilwa1_340956_gm1_5278_g                           | superfamily | 223021 | 423 | 659  | 1.72E-08 | 58.4113 | cl33720 | PHA03247 | superfamily |
| Cersp1_345285_gm1_1455_g                           | superfamily | 223021 | 494 | 724  | 0.000424 | 44.1589 | cl33720 | PHA03247 | superfamily |
| Melen1_158247_CE158246_6168                        | superfamily | 223021 | 219 | 664  | 2E-08    | 58.4113 | cl33720 | PHA03247 | superfamily |
| Mycgale1_638387_CE638386_1733                      | superfamily | 223025 | 210 | 335  | 0.009958 | 38.387  | cl29984 | PHA03253 | superfamily |
| Cerbo1_1824_transcript_CEH13785                    | superfamily | 223039 | 421 | 723  | 3.65E-05 | 47.4733 | cl33723 | PHA03307 | superfamily |
| Ustsp1_129792_CE129791_6750                        | superfamily | 223039 | 352 | 629  | 1.2E-05  | 49.0141 | cl33723 | PHA03307 | superfamily |
| Micid1_2085_MVLG_02359T0                           | superfamily | 223065 | 311 | 485  | 2.6E-05  | 50.0656 | cl33729 | PHA03378 | superfamily |
| Schrad1_73154_e_gw1_183_45_1                       | superfamily | 235906 | 607 | 880  | 0.001434 | 42.5292 | cl35530 | PRK07003 | superfamily |
| Pycpun1_512725_fgenesh1_pm_3_65                    | superfamily | 236090 | 260 | 440  | 0.008282 | 39.5841 | cl35613 | PRK07764 | superfamily |
| Traij1_1020596_estExt_Genewise1_C_270097           | superfamily | 236090 | 301 | 460  | 0.007193 | 39.1989 | cl35613 | PRK07764 | superfamily |
| Amylap1_1_824162_gm1_6530_g                        | superfamily | 236090 | 565 | 724  | 0.000619 | 43.0509 | cl35613 | PRK07764 | superfamily |
| Porspa1_1857417_estExt_Genewise1_C_190202          | superfamily | 236090 | 469 | 673  | 3.33E-05 | 47.6733 | cl35613 | PRK07764 | superfamily |
| Rhitru1_344191_CE344190_6430                       | superfamily | 236090 | 257 | 454  | 0.001321 | 42.2805 | cl35613 | PRK07764 | superfamily |
| Ganluc1_360691_e_gw1_24_215_1                      | superfamily | 236090 | 583 | 719  | 3.24E-07 | 53.8365 | cl35613 | PRK07764 | superfamily |
| Rhisa1_871052_estExt_fgenesh1_pm_C_100013          | superfamily | 236090 | 254 | 452  | 0.000479 | 43.8213 | cl35613 | PRK07764 | superfamily |
| Suivari1_1033365_CE1033364_5370                    | superfamily | 236090 | 227 | 438  | 0.001139 | 42.2805 | cl35613 | PRK07764 | superfamily |
| Suidis1_781775_gm1_15463_g                         | superfamily | 236090 | 227 | 438  | 0.00606  | 39.5841 | cl35613 | PRK07764 | superfamily |
| Auramp1_569146_gm1_6541_g                          | superfamily | 236090 | 535 | 619  | 2.18E-05 | 48.4437 | cl35613 | PRK07764 | superfamily |
| Schrad1_77061_e_gw1_268_33_1                       | superfamily | 236090 | 687 | 891  | 0.009869 | 39.5841 | cl35613 | PRK07764 | superfamily |
| Schco_TatD_1_268567_estExt_Genewise1_C_840033      | superfamily | 236090 | 688 | 900  | 0.001427 | 42.6657 | cl35613 | PRK07764 | superfamily |
| SchcoUNK_1_43169_e_gw1_39_53_1                     | superfamily | 236090 | 684 | 896  | 0.006499 | 40.3545 | cl35613 | PRK07764 | superfamily |
| SchcoZB1_61313_e_gw1_96_110_1                      | superfamily | 236090 | 687 | 899  | 0.001842 | 42.2805 | cl35613 | PRK07764 | superfamily |
| SchcoZB2_52085_e_gw1_50_31_1                       | superfamily | 236090 | 509 | 738  | 1.04E-05 | 49.5993 | cl35613 | PRK07764 | superfamily |
| SchcoZB2_52085_e_gw1_50_31_1                       | superfamily | 236090 | 687 | 899  | 0.002611 | 41.5101 | cl35613 | PRK07764 | superfamily |
| Schfas1_66389_gm1_6929_g                           | superfamily | 236090 | 495 | 698  | 8.76E-06 | 49.9845 | cl35613 | PRK07764 | superfamily |
| Schrad1_73154_e_gw1_183_45_1                       | superfamily | 236090 | 534 | 725  | 0.000104 | 46.1325 | cl35613 | PRK07764 | superfamily |
| Rhiso1_607_transcript_EUC54060                     | superfamily | 236090 | 899 | 1083 | 0.000281 | 44.9769 | cl35613 | PRK07764 | superfamily |
| Wolco1_121729_estExt_Genewise1_C_6_t30169          | superfamily | 236090 | 371 | 445  | 0.000129 | 44.9769 | cl35613 | PRK07764 | superfamily |
| Auramp1_577871_gm1_15266_g                         | superfamily | 236090 | 577 | 757  | 9.88E-05 | 46.5177 | cl35613 | PRK07764 | superfamily |
| Porchr1_157083_CE157082_6106                       | superfamily | 236090 | 426 | 625  | 0.000197 | 44.5917 | cl35613 | PRK07764 | superfamily |
| Porchr1_425602_CE425601_6082                       | superfamily | 236090 | 426 | 625  | 0.000197 | 44.5917 | cl35613 | PRK07764 | superfamily |
| Punst1_116033_fgenesh1_pm_14_33                    | superfamily | 236090 | 285 | 383  | 0.002688 | 41.5101 | cl35613 | PRK07764 | superfamily |
| Pyci1_2814_scf184795_g2                            | superfamily | 236090 | 274 | 448  | 0.004194 | 39.9693 | cl35613 | PRK07764 | superfamily |
| Fibra1_7604_FIBRA_06256m_01                        | superfamily | 236090 | 515 | 692  | 0.003363 | 40.7397 | cl35613 | PRK07764 | superfamily |
| Onnsc1_354243_CE354242_7719                        | superfamily | 236669 | 452 | 655  | 0.000261 | 44.3055 | cl35903 | PRK10263 | superfamily |
| Lenrap1_155_70288_fgenesh1_pg_190_8                | superfamily | 236669 | 295 | 377  | 0.005019 | 41.2239 | cl35903 | PRK10263 | superfamily |
| Lentinedodes1_10281_LE01Gene05754_t1               | superfamily | 236669 | 755 | 1028 | 0.006838 | 40.8387 | cl35903 | PRK10263 | superfamily |

|                                                   |             |        |      |      |          |         |           |                                 |
|---------------------------------------------------|-------------|--------|------|------|----------|---------|-----------|---------------------------------|
| Amarub1_1273017_estExt_fgenes1_pm_C_490022        | superfamily | 236669 | 572  | 661  | 0.00337  | 41.2239 | cl35903   | PRK10263 superfamily            |
| Suiplo1_55650_CE55649_9389                        | superfamily | 236669 | 410  | 627  | 0.000511 | 43.5351 | cl35903   | PRK10263 superfamily            |
| Suidis1_781775_gm1_15463_g                        | superfamily | 236669 | 338  | 541  | 3.78E-05 | 46.6167 | cl35903   | PRK10263 superfamily            |
| Suisubl1_1925720_gm1_13052_g                      | superfamily | 236669 | 409  | 650  | 0.00015  | 45.4611 | cl35903   | PRK10263 superfamily            |
| Suiploc1_161061_CE161060_12586                    | superfamily | 236669 | 410  | 626  | 0.00022  | 45.0759 | cl35903   | PRK10263 superfamily            |
| SuifC429_1_1362418_gm1_8783_g                     | superfamily | 236669 | 404  | 620  | 8.09E-05 | 46.2315 | cl35903   | PRK10263 superfamily            |
| Suipunc1_52268_CE52267_7866                       | superfamily | 236669 | 407  | 624  | 0.00028  | 44.6907 | cl35903   | PRK10263 superfamily            |
| Conapa1_882507_estExt_fgenes1_pg_C_1030020        | superfamily | 237057 | 239  | 350  | 0.002544 | 41.3999 | cl36108   | PRK12323 superfamily            |
| Schco_TatD_1_268567_estExt_Genewise1_C_840033     | superfamily | 237057 | 528  | 740  | 0.000306 | 44.4815 | cl36108   | PRK12323 superfamily            |
| SchcoZB1_61313_e_gw1_96_110_1                     | superfamily | 237057 | 527  | 739  | 0.000334 | 44.4815 | cl36108   | PRK12323 superfamily            |
| Schfas1_66389_gm1_6929_g                          | superfamily | 237057 | 600  | 850  | 7.57E-06 | 49.8743 | cl36108   | PRK12323 superfamily            |
| Mycepi1_151189_CE151188_2862                      | superfamily | 237057 | 537  | 665  | 0.00801  | 39.8591 | cl36108   | PRK12323 superfamily            |
| Urooc1_54133_CE54132_24278                        | superfamily | 237057 | 428  | 609  | 0.000219 | 44.4815 | cl36108   | PRK12323 superfamily            |
| Psehu1_4469_PHSY_004939m_01                       | superfamily | 237057 | 392  | 603  | 2.64E-09 | 60.2747 | cl36108   | PRK12323 superfamily            |
| Ptegra1_657025_estExt_fgenes1_pg_C_180048         | superfamily | 183558 | 222  | 341  | 0.000746 | 41.778  | cl32772   | PRK12495 superfamily            |
| Myc59_1_640918_CE640917_470                       | superfamily | 237865 | 274  | 426  | 0.000272 | 43.1644 | cl36447   | PRK14951 superfamily            |
| Kalbr1_487_transcript_EST10121                    | superfamily | 237865 | 555  | 665  | 0.004913 | 40.0828 | cl36447   | PRK14951 superfamily            |
| Daequ1_321421_CE321420_4888                       | superfamily | 237871 | 375  | 447  | 0.000588 | 43.1915 | cl36453   | PRK14965 superfamily            |
| Rhobu1_113189_CE113188_925                        | superfamily | 185594 | 273  | 416  | 0.000177 | 44.6807 | cl33180   | PTZ00395 superfamily            |
| Suivari1_1033365_CE1033364_5370                   | superfamily | 185594 | 373  | 658  | 0.000732 | 43.1399 | cl33180   | PTZ00395 superfamily            |
| Suilak1_1189890_CE1189889_11290                   | superfamily | 185594 | 374  | 640  | 3.4E-06  | 50.8439 | cl33180   | PTZ00395 superfamily            |
| Boled5_233466_Boled1_CE233465_29745               | superfamily | 185594 | 442  | 650  | 0.006837 | 40.0584 | cl33180   | PTZ00395 superfamily            |
| Boledp1_1541191_MIX76635_7578_21                  | superfamily | 185594 | 442  | 635  | 0.001572 | 42.3695 | cl33180   | PTZ00395 superfamily            |
| Fompi3_1060568_estExt_Genemark1_C_310088          | superfamily | 185594 | 523  | 683  | 5.25E-07 | 53.5403 | cl33180   | PTZ00395 superfamily            |
| Paxam1_983512_fgenes1_pg_171_7                    | superfamily | 185594 | 487  | 670  | 0.002671 | 41.5991 | cl33180   | PTZ00395 superfamily            |
| Spalat1_826655_gm1_5992_g                         | superfamily | 185616 | 609  | 738  | 0.002908 | 40.7038 | cl33183   | PTZ00436 superfamily            |
| Fibra1_7604_FIBRA_06256m_01                       | superfamily | 273167 | 306  | 372  | 0.00246  | 41.0339 | cl36702   | rad23 superfamily               |
| Micld1_2085_MVLG_02359T0                          | specific    | 426620 | 2553 | 2760 | 2.16E-59 | 202.737 | pfam02145 | Rap_GAP                         |
| Mereb1_352854_gm1_1776_g                          | specific    | 426620 | 2311 | 2521 | 2.42E-65 | 219.686 | pfam02145 | Rap_GAP                         |
| Pisalb1_2362488_gm1_4686_g                        | superfamily | 227709 | 566  | 781  | 4.18E-05 | 47.5783 | cl34999   | ROM1 superfamily                |
| Cont1119283_101566_fgenes1_pm_11_67               | superfamily | 273721 | 204  | 288  | 0.001631 | 41.8286 | cl36939   | SF-CC1 superfamily              |
| Wolco1_121729_estExt_Genewise1_C_6_130169         | superfamily | 273721 | 276  | 345  | 0.000711 | 42.2138 | cl36939   | SF-CC1 superfamily              |
| Flaf1_1418277_gm1_9114_g                          | superfamily | 273721 | 251  | 330  | 0.007895 | 39.5174 | cl36939   | SF-CC1 superfamily              |
| Pospl1_127743_estExt_fgenes3_pg_C_460027          | superfamily | 434837 | 1877 | 1968 | 0.005269 | 40.3383 | cl44635   | SPATA3 superfamily              |
| Pospl1_127743_estExt_fgenes3_pg_C_460027          | superfamily | 444852 | 79   | 451  | 2.27E-84 | 282.923 | cl00342   | Trp-synth-beta_II superfamily   |
| Micld1_2085_MVLG_02359T0                          | superfamily | 427360 | 2047 | 2300 | 4.26E-33 | 132.831 | cl04144   | Tuberin superfamily             |
| Mereb1_352854_gm1_1776_g                          | superfamily | 427360 | 1773 | 2033 | 6.49E-31 | 126.283 | cl04144   | Tuberin superfamily             |
| Myc59_1_2430144_estExt_Genemark1_C_240139         | superfamily | 455498 | 298  | 352  | 0.004677 | 40.2301 | cl42153   | UPF0182 superfamily             |
| Copang1_514297_CE514296_7177                      | superfamily | 372950 | 385  | 426  | 0.006726 | 36.7105 | cl16686   | YppG superfamily                |
| Pospl1_127743_estExt_fgenes3_pg_C_460027          | superfamily | 449370 | 443  | 816  | 0        | 556.705 | cl14876   | Zinc_peptidase_like superfamily |
| Bas-Velvet3                                       |             |        |      |      |          |         |           |                                 |
| Jaaar1_194263_gm1_6983_g                          | specific    | 432889 | 2    | 43   | 0.00242  | 37.468  | pfam12937 | F-box-like                      |
| Dactor1_411860_CE411859_1790                      | superfamily | 401645 | 282  | 435  | 7.62E-06 | 48.4936 | cl37801   | PAT1 superfamily                |
| Tulca1_182676_CE95431_2423                        | superfamily | 223021 | 236  | 549  | 1.66E-07 | 54.5593 | cl33720   | PHA03247 superfamily            |
| Phevit1_1765865_gm1_5218_g                        | superfamily | 223021 | 12   | 228  | 0.003596 | 41.0773 | cl33720   | PHA03247 superfamily            |
| Tulsp425_1_888010_CE888009_7623                   | superfamily | 223021 | 261  | 555  | 4.31E-08 | 56.4853 | cl33720   | PHA03247 superfamily            |
| Antsi1_791169_estExt_Genemark1_C_2010004          | superfamily | 223021 | 128  | 337  | 3.64E-05 | 46.8553 | cl33720   | PHA03247 superfamily            |
| Copci1_15745_fgenesDR_te_pg_Ch_r_3_370            | superfamily | 223021 | 682  | 839  | 0.006977 | 40.3069 | cl33720   | PHA03247 superfamily            |
| Pycsa1_1470746_CE1470745_606                      | superfamily | 165513 | 131  | 217  | 0.001002 | 40.2722 | cl31530   | PHA03255 superfamily            |
| Porchr1_256207_CE256206_10340                     | superfamily | 165527 | 60   | 191  | 0.001485 | 41.6376 | cl29788   | PHA03269 superfamily            |
| Pomie1_2_55756_CE55755_5978                       | superfamily | 165527 | 62   | 193  | 0.000995 | 42.408  | cl29788   | PHA03269 superfamily            |
| Botbo1_28767_fgenes1_kg_6_75_Locus17234v1rpkm1_20 | superfamily | 223039 | 245  | 485  | 1.83E-08 | 57.1033 | cl33723   | PHA03307 superfamily            |
| Calco1_17345_CE17344_3571                         | superfamily | 237057 | 284  | 441  | 0.000329 | 42.9407 | cl36108   | PRK12323 superfamily            |
| Schpa1_433496_CE433495_10189                      | superfamily | 237057 | 3    | 222  | 0.001008 | 42.5555 | cl36108   | PRK12323 superfamily            |
| Macfu1_775400_estExt_Genemark1_C_1110008          | superfamily | 237865 | 278  | 386  | 0.001171 | 42.0088 | cl36447   | PRK14951 superfamily            |
| Jaaar1_194263_gm1_6983_g                          | specific    | 350346 | 1392 | 1715 | 3.92E-66 | 222.115 | cd14496   | PTP_paladin                     |
| Jaaar1_194263_gm1_6983_g                          | specific    | 350346 | 441  | 677  | 9.85E-59 | 200.929 | cd14496   | PTP_paladin                     |
| Jaaar1_194263_gm1_6983_g                          | specific    | 350346 | 976  | 1278 | 6.31E-55 | 189.758 | cd14496   | PTP_paladin                     |
| Pheign1_1_350525_e_gw1_42_66_1                    | superfamily | 185628 | 40   | 262  | 0.00106  | 42.3694 | cl33186   | PTZ00449 superfamily            |
| Pycin1_1046036_gm1_579_g                          | superfamily | 431141 | 414  | 487  | 0.000605 | 42.5097 | cl25902   | Rrn6 superfamily                |
| Pyci1_1014_scf184601_g21                          | superfamily | 431141 | 408  | 481  | 0.000699 | 42.1245 | cl25902   | Rrn6 superfamily                |
| Chy-VelB                                          |             |        |      |      |          |         |           |                                 |
| Powhir1_97925_CE97924_4828                        | superfamily | 223021 | 31   | 215  | 0.001368 | 41.4625 | cl33720   | PHA03247 superfamily            |
| Gaesem1_592362_gm1_4145_g                         | superfamily | 223021 | 4    | 187  | 2.73E-05 | 46.4701 | cl33720   | PHA03247 superfamily            |
| Powhir1_444218_pg_43_3                            | superfamily | 223021 | 31   | 331  | 0.000296 | 43.7737 | cl33720   | PHA03247 superfamily            |
| Triarc1_603630_kg_2_546_DN1940_c0_g1_i2           | superfamily | 215299 | 279  | 397  | 0.005814 | 39.8909 | cl30537   | PLN02543 superfamily            |
| Spipu1_2175_SPPG_06849T0                          | superfamily | 236669 | 3    | 174  | 0.004333 | 39.2979 | cl35903   | PRK10263 superfamily            |
| Spipu1_345_SPPG_00327T0                           | superfamily | 435070 | 192  | 339  | 0.001306 | 41.0689 | cl25748   | SAP130_C superfamily            |
| Enthel1_456833_kg_49_135_DN6402_c5_g2_i1          | superfamily | 428027 | 285  | 344  | 0.00703  | 37.7938 | cl04615   | SelP_N superfamily              |
| Chy-Velvet1                                       |             |        |      |      |          |         |           |                                 |
| NeoGfMa1_640311_MIX33926_16_2                     | superfamily | 237171 | 578  | 652  | 0.003948 | 41.4279 | cl36163   | PRK12678 superfamily            |

|                                              |                                            |                                               |             |        |      |          |          |           |                             |                             |
|----------------------------------------------|--------------------------------------------|-----------------------------------------------|-------------|--------|------|----------|----------|-----------|-----------------------------|-----------------------------|
|                                              | NeoGfMa1_325469_e_gw1_32_716_1             | superfamily                                   | 173412      | 434    | 747  | 0.009461 | 40.1243  | cl31754   | PTZ00121 superfamily        |                             |
| Chy-VosA                                     | Gaesem1_542589_pg_32_7                     | superfamily                                   | 455732      | 403    | 605  | 0.00123  | 41.9088  | cl42387   | dermokine superfamily       |                             |
|                                              | Spipu1_6035_SPPG_02528T0                   | superfamily                                   | 455861      | 269    | 492  | 0.002311 | 40.9644  | cl42516   | dnaA superfamily            |                             |
|                                              | Batsa1_34_transcript_OON11198              | superfamily                                   | 273733      | 307    | 389  | 0.005181 | 40.185   | cl25888   | hnRNP-L_PTB superfamily     |                             |
|                                              | Hompol1_6859_HPOL_005119-RA                | superfamily                                   | 130689      | 450    | 556  | 4.06E-05 | 46.3386  | cl31127   | PABP-1234 superfamily       |                             |
|                                              | Spipu1_6035_SPPG_02528T0                   | superfamily                                   | 223021      | 414    | 640  | 0.000282 | 44.5441  | cl33720   | PHA03247 superfamily        |                             |
|                                              | Gorhay1_201103_kg_3_1230_DN2215_c1_g2_i1   | superfamily                                   | 223021      | 213    | 691  | 4.18E-12 | 69.9672  | cl33720   | PHA03247 superfamily        |                             |
|                                              | Batde5_35531_estExt_pg_C_90153             | superfamily                                   | 223021      | 526    | 961  | 3.84E-07 | 54.5593  | cl33720   | PHA03247 superfamily        |                             |
|                                              | Chyhya1_409027_CE409026_10348              | superfamily                                   | 236090      | 173    | 339  | 0.001109 | 42.2805  | cl35613   | PRK07764 superfamily        |                             |
|                                              | Clapol1_1_600061_gw1_11_24_1               | superfamily                                   | 184918      | 176    | 240  | 0.004693 | 38.0003  | cl33039   | PRK14954 superfamily        |                             |
| Muc-VelB                                     | MomiAD069_1_2737_BG005_002768_T1           | superfamily                                   | 450167      | 29     | 252  | 3.97E-16 | 78.154   | cl17173   | AdoMet_MTases superfamily   |                             |
|                                              | MoclAM1000_1_6680_BGZ81_006774_T1          | superfamily                                   | 450167      | 8      | 60   | 2.26E-05 | 44.0933  | cl17173   | AdoMet_MTases superfamily   |                             |
|                                              | MoveN2611_1_5620_BGZ59_005681_T1           | superfamily                                   | 450167      | 37     | 108  | 0.000264 | 41.3969  | cl17173   | AdoMet_MTases superfamily   |                             |
|                                              | MoveTTC192_1_5070_CPC16_005137_T1          | superfamily                                   | 450167      | 37     | 108  | 0.000264 | 41.3969  | cl17173   | AdoMet_MTases superfamily   |                             |
|                                              | MoveAD079_1_8320_CPB97_008399_T1           | superfamily                                   | 450167      | 534    | 763  | 3.42E-16 | 79.6948  | cl17173   | AdoMet_MTases superfamily   |                             |
|                                              | HabiNA12553_1_6962_BGZ52_006998_T1         | superfamily                                   | 450167      | 16     | 114  | 0.000211 | 43.3229  | cl17173   | AdoMet_MTases superfamily   |                             |
|                                              | Mucam1_8607_transcript_GAN09185            | superfamily                                   | 227952      | 64     | 212  | 0.003466 | 39.2698  | cl35042   | COG5665 superfamily         |                             |
|                                              | Rhich1_14842_A14829                        | superfamily                                   | 227278      | 541    | 681  | 0.000575 | 43.1721  | cl34844   | EnvC superfamily            |                             |
|                                              | MoalAD072_1_9894_BGZ68_009999_T1           | superfamily                                   | 227455      | 314    | 428  | 3.21E-16 | 76.5789  | cl34916   | FRQ1 superfamily            |                             |
|                                              | MospGBA30_1_5037_BGX28_005067_T1           | superfamily                                   | 227455      | 211    | 343  | 3.7E-16  | 76.1937  | cl34916   | FRQ1 superfamily            |                             |
|                                              | HabiNA12553_1_6962_BGZ52_006998_T1         | specific                                      | 430048      | 367    | 395  | 1.6E-07  | 48.1628  | pfam08518 | GIT_SHD                     |                             |
|                                              | HabiNA12553_1_6962_BGZ52_006998_T1         | specific                                      | 430048      | 415    | 440  | 2.04E-05 | 42.3848  | pfam08518 | GIT_SHD                     |                             |
|                                              | HabiNA12553_1_6962_BGZ52_006998_T1         | superfamily                                   | 432399      | 1013   | 1142 | 4.51E-14 | 69.2516  | cl20096   | GIT1_C superfamily          |                             |
|                                              | Mucci3_1562578_fgenes1_pm_3_792            | superfamily                                   | 452895      | 449    | 520  | 0.000342 | 44.0805  | cl28910   | MFS superfamily             |                             |
|                                              | MoveAD079_1_8320_CPB97_008399_T1           | superfamily                                   | 215476      | 3      | 471  | 6.9E-159 | 480.312  | cl33589   | PLN02881 superfamily        |                             |
|                                              | Mycind1_633139_estExt_Genewise1_C_7_t20141 | superfamily                                   | 236669      | 220    | 308  | 0.000303 | 44.3055  | cl35903   | PRK10263 superfamily        |                             |
|                                              | Rhiso1_723857_gm1_1012_g                   | specific                                      | 411031      | 210    | 351  | 4.36E-31 | 119.39   | cd21044   | Rab11BD_RAB3IP_like         |                             |
|                                              | Spoumb1_588632_estExt_Genemark1_C_670009   | specific                                      | 425753      | 419    | 623  | 1.85E-59 | 202.593  | pfam00566 | RabGAP-TBC                  |                             |
|                                              | Rhiso1_772580_estExt_Genemark1_C_90224     | specific                                      | 425753      | 358    | 561  | 5.52E-61 | 206.445  | pfam00566 | RabGAP-TBC                  |                             |
|                                              | MoalAD072_1_9894_BGZ68_009999_T1           | superfamily                                   | 273167      | 584    | 701  | 3.4E-05  | 46.8119  | cl36702   | rad23 superfamily           |                             |
|                                              | Rhiso1_723857_gm1_1012_g                   | superfamily                                   | 428938      | 127    | 178  | 3.34E-08 | 51.0313  | cl05764   | Sec2p superfamily           |                             |
|                                              | HabiNA12553_1_6962_BGZ52_006998_T1         | superfamily                                   | 224117      | 541    | 729  | 8.35E-07 | 53.5648  | cl34174   | Smc superfamily             |                             |
|                                              | Rhiso1_723857_gm1_1012_g                   | superfamily                                   | 224117      | 11     | 210  | 0.000887 | 42.394   | cl34174   | Smc superfamily             |                             |
|                                              | Spoumb1_588632_estExt_Genemark1_C_670009   | superfamily                                   | 224117      | 716    | 896  | 3.1E-06  | 51.2536  | cl34174   | Smc superfamily             |                             |
|                                              | Rhich1_14842_A14829                        | superfamily                                   | 224117      | 522    | 806  | 0.006045 | 40.0828  | cl34174   | Smc superfamily             |                             |
|                                              | Muccirc1_2940_transcript_EPB90136          | superfamily                                   | 224117      | 863    | 1035 | 1.63E-05 | 49.3276  | cl34174   | Smc superfamily             |                             |
|                                              | Mucci3_1562578_fgenes1_pm_3_792            | superfamily                                   | 274008      | 772    | 965  | 0.00834  | 40.4251  | cl37069   | SMC_prok_B superfamily      |                             |
|                                              | Muc-Velvet1                                | Bifad1_3271_transcript_OZJ04790               | specific    | 235422 | 132  | 631      | 1.6E-163 | 486.588   | PRK05342                    | clpX                        |
|                                              |                                            | HapNA10739_1_4850_BGZ50_004910_T1             | superfamily | 455861 | 10   | 108      | 0.00197  | 40.5792   | cl42516                     | dnaA superfamily            |
|                                              |                                            | HapNA10996_1_682_BGZ51_000693_T1              | superfamily | 455861 | 10   | 108      | 0.00197  | 40.5792   | cl42516                     | dnaA superfamily            |
|                                              |                                            | Rhich1_208_A00137                             | superfamily | 433564 | 139  | 395      | 6.17E-26 | 109.26    | cl16461                     | Glyco_transf_49 superfamily |
|                                              |                                            | Chocucu1_477852_estExt_Genewise1Plus_C_160108 | superfamily | 433564 | 166  | 391      | 2.83E-22 | 98.4749   | cl16461                     | Glyco_transf_49 superfamily |
|                                              |                                            | Mucfus1_366818_Mf86594_m_Sexual               | superfamily | 433564 | 281  | 496      | 8.23E-16 | 79.2149   | cl16461                     | Glyco_transf_49 superfamily |
| Mycind1_728354_gm1_8311_g                    |                                            | superfamily                                   | 433564      | 165    | 407  | 8.29E-24 | 103.097  | cl16461   | Glyco_transf_49 superfamily |                             |
| Cokrec1_456470_estExt_Genewise1_C_170110     |                                            | superfamily                                   | 433564      | 138    | 376  | 2.34E-14 | 74.5925  | cl16461   | Glyco_transf_49 superfamily |                             |
| Muclan1_10587_MI20231_m_Sexual               |                                            | superfamily                                   | 433564      | 173    | 403  | 2.23E-25 | 107.334  | cl16461   | Glyco_transf_49 superfamily |                             |
| Parpar1_385187_estExt_Genewise1Plus_C_310029 |                                            | superfamily                                   | 433564      | 150    | 395  | 6.77E-24 | 103.097  | cl16461   | Glyco_transf_49 superfamily |                             |
| Sakvas1_6240_SVAS_05245_R0                   |                                            | superfamily                                   | 433564      | 235    | 458  | 7.67E-19 | 88.4597  | cl16461   | Glyco_transf_49 superfamily |                             |
| Pilano1_435905_estExt_fgenes1_pm_C_270051    |                                            | superfamily                                   | 433564      | 142    | 382  | 4.89E-26 | 109.26   | cl16461   | Glyco_transf_49 superfamily |                             |
| Lichy1_166366_estExt_Genewise1Plus_C_1430014 |                                            | superfamily                                   | 433564      | 197    | 437  | 1.61E-29 | 119.661  | cl16461   | Glyco_transf_49 superfamily |                             |
| Kircor1_436390_fgenes1_pm_66_20              |                                            | superfamily                                   | 433564      | 141    | 382  | 2.3E-31  | 124.668  | cl16461   | Glyco_transf_49 superfamily |                             |
| Radspe1_502696_e_gw1_12_236_1                |                                            | superfamily                                   | 433564      | 213    | 452  | 1.08E-24 | 105.408  | cl16461   | Glyco_transf_49 superfamily |                             |
| Lenpar1_767464_e_gw1_4_51_1                  |                                            | superfamily                                   | 433564      | 209    | 443  | 7.88E-12 | 66.8885  | cl16461   | Glyco_transf_49 superfamily |                             |
| Rhior3_7750_RO3G_07452                       |                                            | superfamily                                   | 433564      | 140    | 383  | 6.79E-26 | 108.875  | cl16461   | Glyco_transf_49 superfamily |                             |
| Amyrou1_518916_e_gw1_13_308_1                |                                            | superfamily                                   | 433564      | 140    | 383  | 3E-25    | 106.949  | cl16461   | Glyco_transf_49 superfamily |                             |
| Rhimi_ATCC52814_1_208481_e_gw1_83_107_1      |                                            | superfamily                                   | 433564      | 139    | 395  | 1.48E-24 | 105.023  | cl16461   | Glyco_transf_49 superfamily |                             |
| Rhimi_ATCC11559_1_178732_e_gw1_64_113_1      |                                            | superfamily                                   | 433564      | 139    | 395  | 4.89E-26 | 109.26   | cl16461   | Glyco_transf_49 superfamily |                             |
| Umbsp_AD052_1_274229_e_gw1_6_468_1           |                                            | superfamily                                   | 433564      | 224    | 470  | 1.12E-25 | 108.49   | cl16461   | Glyco_transf_49 superfamily |                             |
| Umban1_299519_e_gw1_6_1140_1                 |                                            | superfamily                                   | 433564      | 224    | 470  | 4.03E-23 | 100.786  | cl16461   | Glyco_transf_49 superfamily |                             |

|                                                |             |        |     |      |          |         |           |                             |
|------------------------------------------------|-------------|--------|-----|------|----------|---------|-----------|-----------------------------|
| Lenzyc1_741989_e_gw1_7_1655_1                  | superfamily | 433564 | 205 | 441  | 2.06E-16 | 80.7557 | cl16461   | Glyco_transf_49 superfamily |
| Umbelo1_419457_e_gw1_2_1071_1                  | superfamily | 433564 | 241 | 487  | 2.54E-24 | 104.638 | cl16461   | Glyco_transf_49 superfamily |
| Blatri_F921_1_387317_e_gw1_30_219_1            | superfamily | 433564 | 149 | 374  | 4.62E-24 | 103.482 | cl16461   | Glyco_transf_49 superfamily |
| Blatri_F986_2_341746_e_gw1_6_168_1             | superfamily | 433564 | 149 | 374  | 4.62E-24 | 103.482 | cl16461   | Glyco_transf_49 superfamily |
| Blatri1_332830_e_gw1_47_125_1                  | superfamily | 433564 | 149 | 374  | 4.62E-24 | 103.482 | cl16461   | Glyco_transf_49 superfamily |
| Mucmuc1_414754_e_gw1_16_121_1                  | superfamily | 433564 | 151 | 375  | 7.59E-23 | 100.016 | cl16461   | Glyco_transf_49 superfamily |
| Gilper1_580993_fgenes1_pm_41_12                | superfamily | 433564 | 156 | 382  | 5.55E-25 | 106.179 | cl16461   | Glyco_transf_49 superfamily |
| Ellano2_366625_e_gw1_11_77_1                   | superfamily | 433564 | 212 | 449  | 4.49E-12 | 67.6589 | cl16461   | Glyco_transf_49 superfamily |
| Kircor1_262296_e_gw1_3_666_1                   | superfamily | 433564 | 148 | 388  | 3.06E-16 | 80.3705 | cl16461   | Glyco_transf_49 superfamily |
| PnitS607_1_795931_e_gw1_1_601_1                | superfamily | 433564 | 133 | 354  | 1.21E-08 | 56.8733 | cl16461   | Glyco_transf_49 superfamily |
| Phybl_L51_1_1629923_e_gw1_1_372_1_1            | superfamily | 433564 | 104 | 340  | 1.81E-14 | 74.5925 | cl16461   | Glyco_transf_49 superfamily |
| PhyblU21_2_1728340_e_gw1_1_159_9_1             | superfamily | 433564 | 104 | 340  | 1.81E-14 | 74.5925 | cl16461   | Glyco_transf_49 superfamily |
| Benpoi1_490130_e_gw1_7_1160_1                  | superfamily | 433564 | 148 | 386  | 1.14E-20 | 93.4673 | cl16461   | Glyco_transf_49 superfamily |
| Ellano2_368721_e_gw1_13_126_1                  | superfamily | 433564 | 170 | 401  | 1.53E-23 | 101.942 | cl16461   | Glyco_transf_49 superfamily |
| Phybla1_1516203_e_gw1_1_191_1                  | superfamily | 433564 | 104 | 340  | 1.81E-14 | 74.5925 | cl16461   | Glyco_transf_49 superfamily |
| Chabre1_168301_fgenes1_pm_1_175                | superfamily | 433564 | 151 | 422  | 5.58E-25 | 106.179 | cl16461   | Glyco_transf_49 superfamily |
| Umbisa1_492395_e_gw1_7_191_1                   | superfamily | 433564 | 132 | 378  | 1.31E-28 | 116.964 | cl16461   | Glyco_transf_49 superfamily |
| Thaele1_339597_e_gw1_11_512_1                  | superfamily | 433564 | 138 | 378  | 6.21E-24 | 103.097 | cl16461   | Glyco_transf_49 superfamily |
| Helpul1_645883_estExt_fgenes1_pg_C_70177       | superfamily | 433564 | 139 | 379  | 5.88E-24 | 103.097 | cl16461   | Glyco_transf_49 superfamily |
| Mycifr1_827687_e_gw1_12_912_1                  | superfamily | 433564 | 166 | 398  | 1.04E-22 | 99.6305 | cl16461   | Glyco_transf_49 superfamily |
| Zyghet1_371117_e_gw1_150_14_1                  | superfamily | 433564 | 129 | 394  | 1.28E-26 | 111.186 | cl16461   | Glyco_transf_49 superfamily |
| Dicrob1_482721_e_gw1_3_671_1                   | superfamily | 433564 | 118 | 357  | 1.16E-20 | 93.4673 | cl16461   | Glyco_transf_49 superfamily |
| Pilumb1_841938_fgenes1_pm_5_102                | superfamily | 433564 | 139 | 361  | 2.52E-14 | 74.2073 | cl16461   | Glyco_transf_49 superfamily |
| MoreMES2147_1_9744_BGZ65_009858_T1             | superfamily | 425360 | 479 | 586  | 1.3E-05  | 48.5014 | cl41729   | KLF1_2_4_N superfamily      |
| MohuKOD1050_1_2835_BG004_002842_T1             | superfamily | 425360 | 86  | 140  | 0.003478 | 40.027  | cl41729   | KLF1_2_4_N superfamily      |
| Morve1_4122_MVEG_11562T0                       | superfamily | 425360 | 65  | 112  | 0.006793 | 38.4862 | cl41729   | KLF1_2_4_N superfamily      |
| MocIAM1000_1_2055_BGZ81_002095_T1              | superfamily | 227458 | 133 | 214  | 0.00232  | 39.6428 | cl44195   | MAK16 superfamily           |
| MoalCK1249_1_10067_BGZ70_010154_T1             | superfamily | 223021 | 112 | 251  | 8.93E-05 | 45.6997 | cl33720   | PHA03247 superfamily        |
| MobeAD1040_1_4573_BGZ76_004613_T1              | superfamily | 223021 | 17  | 134  | 0.009222 | 38.3809 | cl33720   | PHA03247 superfamily        |
| MochAD033_1_4348_BGZ79_004375_T1               | superfamily | 332875 | 41  | 113  | 0.001701 | 39.2241 | cl28054   | Pox_Ag35 superfamily        |
| MochN2769_1_6353_BGZ80_006390_T1               | superfamily | 332875 | 41  | 113  | 0.001568 | 39.2241 | cl28054   | Pox_Ag35 superfamily        |
| HaliN2525_1_3335_BGZ46_003354_T1               | superfamily | 236304 | 345 | 479  | 0.001075 | 42.0823 | cl35718   | PRK08581 superfamily        |
| MoelGBA34_1_10473_BGZ88_010541_T1              | superfamily | 236669 | 49  | 206  | 0.003665 | 40.4535 | cl35903   | PRK10263 superfamily        |
| MopoKOD948_1_198_BG011_000201_T1               | superfamily | 236669 | 10  | 142  | 0.000103 | 45.0759 | cl35903   | PRK10263 superfamily        |
| Mocy1230_1_7884_BGZ83_007970_T1                | superfamily | 237171 | 163 | 275  | 0.001035 | 41.8131 | cl36163   | PRK12678 superfamily        |
| Phybl2_178806_estExt_Genemark1_C_10692         | specific    | 185485 | 397 | 568  | 1.4E-118 | 347.799 | PTZ00156  | PTZ00156                    |
| Rhimi59_2_1976649_estExt_fgenes1_pm_C_5_t10462 | specific    | 425753 | 312 | 505  | 6.02E-36 | 135.568 | pfam00566 | RabGAP-TBC                  |
| Rhimi59_2_1976649_estExt_fgenes1_pm_C_5_t10462 | superfamily | 224117 | 683 | 885  | 1.09E-07 | 56.2612 | cl34174   | Smc superfamily             |
| HaspN3175_1_2406_BGZ49_002416_T1               | superfamily | 451284 | 78  | 121  | 0.00556  | 39.0055 | cl21514   | TauE superfamily            |
| MoscN6426_1_8746_BG015_008793_T1               | specific    | 428395 | 356 | 522  | 1.47E-58 | 191.265 | pfam05255 | UPF0220                     |
| Muc-Velvet2                                    |             |        |     |      |          |         |           |                             |
| Kircor1_416181_estExt_Genemark1_C_30348        | specific    | 185498 | 234 | 446  | 2E-151   | 428.297 | PTZ00173  | PTZ00173                    |
| Zyghet1_535231_gm1_15889_g                     | specific    | 185498 | 91  | 303  | 1.3E-146 | 410.577 | PTZ00173  | PTZ00173                    |
| Muc-Velvet3                                    |             |        |     |      |          |         |           |                             |
| HapNA10996_1_7044_BGZ51_007132                 | superfamily | 448367 | 982 | 1429 | 0        | 664.306 | cl11961   | ALDH-SF superfamily         |
| Rhcl1_17367_transcript_GBC05587                | superfamily | 455732 | 677 | 756  | 0.001355 | 41.9088 | cl42387   | dermokine superfamily       |
| MorGBAus27b_1_177841_CE177840                  | superfamily | 455861 | 711 | 891  | 0.000925 | 42.8904 | cl42516   | dnaA superfamily            |
| MospGBA30_1_471_BGX28_000473                   | superfamily | 414561 | 350 | 427  | 0.000245 | 43.5963 | cl05827   | IpaD superfamily            |
| MospAD094_1_11432_BGX26_01149f                 | superfamily | 425360 | 895 | 987  | 0.001597 | 41.953  | cl41729   | KLF1_2_4_N superfamily      |
| RhiirA4_415180_fgenes1_pg_70_13                | superfamily | 223021 | 248 | 682  | 1.64E-06 | 51.8629 | cl33720   | PHA03247 superfamily        |
| RhiirA5_398311_estExt_fgenes1_pg               | superfamily | 223021 | 248 | 682  | 6.14E-06 | 50.3221 | cl33720   | PHA03247 superfamily        |
| RhiirB3_523613_estExt_Genemark1_C              | superfamily | 223021 | 248 | 682  | 6.14E-06 | 50.3221 | cl33720   | PHA03247 superfamily        |
| RhiirA1_1_531809_estExt_Genemark1              | superfamily | 223021 | 248 | 682  | 6.14E-06 | 50.3221 | cl33720   | PHA03247 superfamily        |
| MozyPUSTF9C_1_569_FBU30_00057                  | superfamily | 223021 | 425 | 703  | 0.00547  | 40.6921 | cl33720   | PHA03247 superfamily        |
| MoalAD071_1_6289_BGZ67_006380                  | superfamily | 223021 | 504 | 931  | 4.52E-09 | 61.1077 | cl33720   | PHA03247 superfamily        |
| MoalAD071_1_6289_BGZ67_006380                  | superfamily | 223021 | 222 | 705  | 0.000119 | 46.4701 | cl33720   | PHA03247 superfamily        |
| MoalGBA31_1_6683_BGZ72_006758                  | superfamily | 223021 | 256 | 759  | 4.15E-06 | 51.0925 | cl33720   | PHA03247 superfamily        |
| Morve1_3632_MVEG_11289T0                       | superfamily | 223021 | 535 | 909  | 0.009982 | 39.9217 | cl33720   | PHA03247 superfamily        |
| MoanKOD1229_1_5537_BGZ75_0056                  | superfamily | 223021 | 442 | 869  | 1.00E-07 | 56.4853 | cl33720   | PHA03247 superfamily        |
| MoanKOD1229_1_5537_BGZ75_0056                  | superfamily | 223021 | 160 | 643  | 0.001236 | 43.0033 | cl33720   | PHA03247 superfamily        |
| EctnN5525_1_10927_BX616_010970                 | superfamily | 223021 | 302 | 616  | 8.72E-05 | 46.8553 | cl33720   | PHA03247 superfamily        |
| HapNA10739_1_8313_BGZ50_008412                 | superfamily | 223021 | 448 | 799  | 1.53E-06 | 52.6333 | cl33720   | PHA03247 superfamily        |
| HapNA10739_1_8313_BGZ50_008412                 | superfamily | 223021 | 343 | 475  | 0.0037   | 41.4625 | cl33720   | PHA03247 superfamily        |
| HapNA10996_1_7044_BGZ51_007132                 | superfamily | 223021 | 423 | 783  | 2.60E-08 | 59.1817 | cl33720   | PHA03247 superfamily        |
| HapNA10996_1_7044_BGZ51_007132                 | superfamily | 223021 | 327 | 459  | 0.000638 | 44.5441 | cl33720   | PHA03247 superfamily        |
| MospNVP41_1_7091_BGX33_007139                  | superfamily | 223021 | 355 | 753  | 0.006411 | 40.6921 | cl33720   | PHA03247 superfamily        |
| MocaN2610_1_11798_BGZ47_011858                 | superfamily | 223021 | 342 | 617  | 0.000555 | 44.1589 | cl33720   | PHA03247 superfamily        |
| Moralp1_1_163976_CE163975_10544                | superfamily | 223039 | 540 | 904  | 1.62E-06 | 52.4809 | cl33723   | PHA03307 superfamily        |





|         |                                          |             |        |      |      |          |         |           |                             |
|---------|------------------------------------------|-------------|--------|------|------|----------|---------|-----------|-----------------------------|
|         | MoscN6426_1_827_BG015_000832_T1          | superfamily | 223039 | 217  | 433  | 5.58E-05 | 46.3177 | cl33723   | PHA03307 superfamily        |
|         | MoeNVP64_1_418301_estExt_fgenes          | superfamily | 223039 | 217  | 435  | 0.007642 | 39.3841 | cl33723   | PHA03307 superfamily        |
|         | h1_pg_C_210186                           |             |        |      |      |          |         |           |                             |
|         | MoeAD073_1_246259_CE246258_1128          | superfamily | 223039 | 217  | 519  | 0.000188 | 44.3917 | cl33723   | PHA03307 superfamily        |
|         | MozyN2592_1_10324_EC991_010525_T1        | superfamily | 223039 | 217  | 433  | 0.001952 | 41.3101 | cl33723   | PHA03307 superfamily        |
|         | Mosp14UC_1_9459_BGW39_009529_T1          | superfamily | 223039 | 217  | 492  | 0.009202 | 38.9989 | cl33723   | PHA03307 superfamily        |
|         | MoelGBA40_1_3610_BGZ89_003625_T1         | superfamily | 223039 | 212  | 430  | 0.005748 | 39.7693 | cl33723   | PHA03307 superfamily        |
|         | MocIN2760_1_9201_EDD11_009369_T1         | superfamily | 236669 | 242  | 438  | 9.66E-06 | 48.9279 | cl35903   | PRK10263 superfamily        |
|         | MogaAD045_1_976_BGZ96_000986_T1          | superfamily | 183558 | 187  | 296  | 0.000526 | 41.778  | cl32772   | PRK12495 superfamily        |
|         | MohyN2591_1_9111_EC957_009258_T1         | superfamily | 183558 | 203  | 312  | 0.003328 | 39.4668 | cl32772   | PRK12495 superfamily        |
|         | HaliN2525_1_8286_BGZ46_008352_T1         | superfamily | 185594 | 236  | 343  | 1.85E-05 | 48.9179 | cl33180   | PTZ00395 superfamily        |
|         | HaspN3175_1_8679_BGZ49_008754_T1         | superfamily | 185594 | 236  | 343  | 0.000408 | 43.1399 | cl33180   | PTZ00395 superfamily        |
|         | MohoAD009_1_9167_BG000_009233_T1         | superfamily | 185628 | 197  | 435  | 1.69E-05 | 47.7622 | cl33186   | PTZ00449 superfamily        |
|         | MocIAM1000_1_11139_BGZ81_011303_T1       | superfamily | 185628 | 196  | 434  | 4.68E-05 | 46.2214 | cl33186   | PTZ00449 superfamily        |
|         | MomiAD069_1_7424_BG005_007508_T1         | superfamily | 185628 | 196  | 431  | 5.46E-06 | 49.303  | cl33186   | PTZ00449 superfamily        |
|         | MoelGBA34_1_8169_BGZ88_008227_T1         | superfamily | 227476 | 841  | 1039 | 1.94E-15 | 80.9871 | cl34920   | REB1 superfamily            |
|         | MocaN2610_1_1478_BGZ47_001482_T1         | superfamily | 227476 | 1004 | 1126 | 4.32E-15 | 80.2167 | cl34920   | REB1 superfamily            |
|         | MogaAD045_1_7260_BGZ96_007323_T1         | superfamily | 227476 | 921  | 1079 | 9.14E-17 | 85.2243 | cl34920   | REB1 superfamily            |
|         | MospNVP41_1_6394_BGX33_006438_T1         | superfamily | 227476 | 881  | 1079 | 9.71E-18 | 88.3059 | cl34920   | REB1 superfamily            |
|         | MospGBA35_1_2582_BGX29_002610_T1         | superfamily | 227476 | 885  | 1083 | 1.04E-17 | 88.3059 | cl34920   | REB1 superfamily            |
|         | MobeAD1040_1_9677_BGZ76_009768_T1        | superfamily | 227709 | 235  | 453  | 0.000255 | 43.7263 | cl34999   | ROM1 superfamily            |
|         | MozyPUSTF9C_1_6101_FBU30_006165_T1       | superfamily | 227709 | 234  | 426  | 0.00047  | 42.9559 | cl34999   | ROM1 superfamily            |
|         | MospAD094_1_6996_BGX26_007033_T1         | superfamily | 227709 | 194  | 442  | 5.13E-05 | 46.0375 | cl34999   | ROM1 superfamily            |
|         | MochAD033_1_2011_BGZ79_002020_T1         | superfamily | 227709 | 151  | 391  | 0.000287 | 43.3411 | cl34999   | ROM1 superfamily            |
|         | MospAD010_1_11385_BGX20_011465_T1        | superfamily | 227709 | 160  | 402  | 0.000243 | 43.7263 | cl34999   | ROM1 superfamily            |
|         | MoveTTC192_1_6456_CPC16_006540_T1        | specific    | 425728 | 748  | 777  | 0.008095 | 34.7053 | pfam00515 | TPR_1                       |
| Pez-VeA | Altca1_103524_ACSCGTG_1027_jigsaw_mRNA_1 | superfamily | 197891 | 465  | 584  | 0.003162 | 39.0025 | cl33250   | Amelogenin superfamily      |
|         | Altcr1_108859_ACRCTG_236_jigsaw_mRNA_1   | superfamily | 197891 | 465  | 584  | 0.003162 | 39.0025 | cl33250   | Amelogenin superfamily      |
|         | Asppust1_238666_fggenes1_pm_19618        | superfamily | 427171 | 270  | 448  | 1.05E-06 | 53.2318 | cl38111   | Atrophia-1 superfamily      |
|         | Asplac1_443942_gm1_3719_g                | superfamily | 427171 | 368  | 492  | 0.000198 | 44.3722 | cl38111   | Atrophia-1 superfamily      |
|         | Aspph1_7605_CE7604_2395                  | superfamily | 427171 | 354  | 478  | 0.000304 | 43.6018 | cl38111   | Atrophia-1 superfamily      |
|         | Pse1611_1_713483_gm1_6625_g              | superfamily | 427171 | 273  | 541  | 1.55E-05 | 48.2242 | cl38111   | Atrophia-1 superfamily      |
|         | Aoar1_203095_CE203094_8103               | superfamily | 427171 | 274  | 559  | 4.59E-06 | 49.765  | cl38111   | Atrophia-1 superfamily      |
|         | Neopa1_2412_UCRNP2_10414m_01             | superfamily | 427171 | 274  | 558  | 0.000314 | 43.987  | cl38111   | Atrophia-1 superfamily      |
|         | Macpha1_378862_CE378861_30934            | superfamily | 427171 | 274  | 494  | 1.24E-09 | 61.321  | cl38111   | Atrophia-1 superfamily      |
|         | Macph1_1625_MPH_01661m_01                | superfamily | 427171 | 274  | 494  | 1.24E-09 | 61.321  | cl38111   | Atrophia-1 superfamily      |
|         | Aspaur1_172868_fggenes1_pm_26_36         | superfamily | 427171 | 237  | 520  | 0.000209 | 45.5278 | cl38111   | Atrophia-1 superfamily      |
|         | Lopmy1_565459_gm1_11464_g                | superfamily | 427171 | 287  | 517  | 2.56E-09 | 61.7062 | cl38111   | Atrophia-1 superfamily      |
|         | DelFL0756_1_194243_CE194242_34694        | superfamily | 427171 | 264  | 537  | 0.001029 | 42.061  | cl38111   | Atrophia-1 superfamily      |
|         | Mytre1_279359_CE279358_4366              | superfamily | 427171 | 287  | 540  | 3.34E-07 | 53.617  | cl38111   | Atrophia-1 superfamily      |
|         | Photr1_204921_CE204920_14070             | superfamily | 427171 | 254  | 543  | 0.001393 | 41.6758 | cl38111   | Atrophia-1 superfamily      |
|         | PhaPMI808_730417_fggenes1_pg_5474        | superfamily | 427171 | 250  | 526  | 1.96E-08 | 57.469  | cl38111   | Atrophia-1 superfamily      |
|         | Clamic1_259668_CE259667_15531            | superfamily | 427171 | 316  | 491  | 0.001127 | 42.061  | cl38111   | Atrophia-1 superfamily      |
|         | Lashir1_366288_CE366287_39595            | superfamily | 427171 | 277  | 490  | 1.91E-05 | 47.4538 | cl38111   | Atrophia-1 superfamily      |
|         | Daces1_451237_e_gw1_18_540_1             | superfamily | 427171 | 322  | 467  | 1.21E-07 | 54.3874 | cl38111   | Atrophia-1 superfamily      |
|         | Cypeu1_121696_HMPREF1541_10303T0         | superfamily | 427171 | 277  | 378  | 0.001842 | 40.9054 | cl38111   | Atrophia-1 superfamily      |
|         | Aspave1_126501_fggenes1_pm_7_1           | superfamily | 448379 | 771  | 898  | 0.008752 | 38.8599 | cl12013   | BAR superfamily             |
|         | Dibbae1_3888_DIBA_008099_RA              | superfamily | 434947 | 305  | 526  | 0.002244 | 40.5318 | cl25809   | CiPC superfamily            |
|         | Asppeni1_123690_CE123689_4995            | superfamily | 430824 | 338  | 455  | 0.009304 | 38.6522 | cl40852   | CytochromB561_N superfamily |
|         | Aspaura1_203970_gm1_7400_g               | specific    | 436606 | 951  | 989  | 0.001313 | 39.8808 | pfam18595 | DHR10                       |
|         | Aspamy1_170918_fggenes1_pm_20_14         | specific    | 436606 | 934  | 975  | 0.001364 | 39.8808 | pfam18595 | DHR10                       |
|         | Amore1_31023_fggenes1_pg_12_171          | superfamily | 455861 | 295  | 515  | 2.16E-05 | 47.1276 | cl42516   | dnaA superfamily            |
|         | Leuca1_1077986_fggenes1_pg_74_56         | superfamily | 455861 | 320  | 458  | 0.001026 | 42.12   | cl42516   | dnaA superfamily            |
|         | Chalo1_235725_CE235724_44958             | superfamily | 455861 | 253  | 443  | 0.001418 | 40.9644 | cl42516   | dnaA superfamily            |
|         | Hyafin1_976942_MIX16197_17877_50         | superfamily | 455861 | 298  | 495  | 6.28E-05 | 45.5868 | cl42516   | dnaA superfamily            |

|                                                   |             |        |      |      |          |         |           |                                                                       |
|---------------------------------------------------|-------------|--------|------|------|----------|---------|-----------|-----------------------------------------------------------------------|
| MelPMI1271_1_383735_fgenes1_pg_121_5              | superfamily | 455861 | 380  | 512  | 0.005337 | 39.4236 | cl42516   | dnaA superfamily                                                      |
| Cersam1_421_CE420_6839                            | superfamily | 455861 | 260  | 481  | 2.94E-05 | 46.7424 | cl42516   | dnaA superfamily                                                      |
| Podtet1_384337_MIX19354_7401_42                   | superfamily | 455861 | 261  | 429  | 0.000841 | 41.7348 | cl42516   | dnaA superfamily                                                      |
| Podan3_206066_mRNA_4894                           | superfamily | 455861 | 271  | 417  | 0.000846 | 42.12   | cl42516   | dnaA superfamily                                                      |
| Podans1_153444_CE153443_8149                      | superfamily | 455861 | 271  | 417  | 0.000846 | 42.12   | cl42516   | dnaA superfamily                                                      |
| Ant016_1_30474_CE30473_29500                      | superfamily | 455861 | 287  | 472  | 0.002201 | 40.5792 | cl42516   | dnaA superfamily                                                      |
| Pezci1_717949_fgenes1_pm_17_12_8                  | superfamily | 455861 | 343  | 511  | 0.000579 | 42.5052 | cl42516   | dnaA superfamily                                                      |
| Colgo1_692230_fgenes1_pm_11_10_5                  | superfamily | 455861 | 281  | 497  | 0.001283 | 41.3496 | cl42516   | dnaA superfamily                                                      |
| Colsa1_945018_mrna_7774                           | superfamily | 455861 | 329  | 504  | 7.22E-05 | 45.5868 | cl42516   | dnaA superfamily                                                      |
| Colsi1_979553_mrna_1673                           | superfamily | 455861 | 316  | 498  | 0.000169 | 44.4312 | cl42516   | dnaA superfamily                                                      |
| Colsp1_7376_mrna_16201                            | superfamily | 455861 | 345  | 498  | 0.003181 | 40.194  | cl42516   | dnaA superfamily                                                      |
| Colta1_15813_mrna_3524                            | superfamily | 455861 | 316  | 498  | 0.001244 | 41.7348 | cl42516   | dnaA superfamily                                                      |
| Colfi1_284943_mRNA9763                            | superfamily | 455861 | 316  | 498  | 0.000573 | 42.5052 | cl42516   | dnaA superfamily                                                      |
| Collup1_786_mrna_786                              | superfamily | 455861 | 316  | 498  | 0.000483 | 42.8904 | cl42516   | dnaA superfamily                                                      |
| Colpa1_8441_mrna_16581                            | superfamily | 455861 | 517  | 699  | 0.000141 | 45.2016 | cl42516   | dnaA superfamily                                                      |
| Colab1_6480_mrna_6480                             | superfamily | 455861 | 316  | 498  | 0.000526 | 42.8904 | cl42516   | dnaA superfamily                                                      |
| Colco1_6075_mrna_14063                            | superfamily | 455861 | 316  | 498  | 0.000478 | 42.8904 | cl42516   | dnaA superfamily                                                      |
| Colcu1_11654_mrna_11654                           | superfamily | 455861 | 316  | 497  | 0.000511 | 42.8904 | cl42516   | dnaA superfamily                                                      |
| Phiglo1_437934_gm4_5830_g                         | superfamily | 455861 | 294  | 417  | 3.1E-06  | 49.824  | cl42516   | dnaA superfamily                                                      |
| Collu1_485900_fgenes1_pg_3_216                    | superfamily | 455861 | 316  | 498  | 0.000462 | 42.8904 | cl42516   | dnaA superfamily                                                      |
| Colme1_6687_mrna_6687                             | superfamily | 455861 | 316  | 498  | 0.000573 | 42.5052 | cl42516   | dnaA superfamily                                                      |
| Ophca1_2048_transcript_PHH75799                   | superfamily | 455861 | 310  | 446  | 0.00153  | 40.9644 | cl42516   | dnaA superfamily                                                      |
| Horth1_4396_BOA50_05387                           | superfamily | 455861 | 436  | 561  | 0.00441  | 40.194  | cl42516   | dnaA superfamily                                                      |
| Trihar1_784206_fgenes1_kg_469_1_m_23631           | superfamily | 455861 | 256  | 420  | 0.000595 | 42.5052 | cl42516   | dnaA superfamily                                                      |
| Triinh1_59490_CE59489_41700                       | superfamily | 455861 | 256  | 420  | 0.000501 | 42.8904 | cl42516   | dnaA superfamily                                                      |
| Trien1_347454_CE347453_11123                      | superfamily | 455861 | 256  | 421  | 0.001969 | 40.9644 | cl42516   | dnaA superfamily                                                      |
| Triha1_95531_e_gw1_14_392_1                       | superfamily | 455861 | 256  | 420  | 0.000593 | 42.5052 | cl42516   | dnaA superfamily                                                      |
| XylPMI506_126167_CE126166_7602                    | superfamily | 455861 | 265  | 439  | 1.26E-05 | 47.898  | cl42516   | dnaA superfamily                                                      |
| TriharT22_1_217059_CE217058_703_09                | superfamily | 455861 | 256  | 420  | 0.000741 | 42.5052 | cl42516   | dnaA superfamily                                                      |
| Metac1_39_MAC_00039m_01                           | superfamily | 455861 | 281  | 458  | 7.67E-05 | 45.2016 | cl42516   | dnaA superfamily                                                      |
| Metma1_543_XM_014727519_1                         | superfamily | 455861 | 281  | 458  | 0.000588 | 42.5052 | cl42516   | dnaA superfamily                                                      |
| Plecucu2_284635_MIX11132_1127_3_4                 | superfamily | 455861 | 247  | 424  | 0.000239 | 44.046  | cl42516   | dnaA superfamily                                                      |
| Trigui1_9566_transcript_OPB39752                  | superfamily | 455861 | 282  | 447  | 0.000416 | 43.2756 | cl42516   | dnaA superfamily                                                      |
| MelPMI1271_1_383735_fgenes1_pg_121_5              | superfamily | 452645 | 252  | 318  | 0.006232 | 38.5687 | cl26593   | DUF2076 superfamily                                                   |
| Lopmy1_565459_gm1_11464_g                         | superfamily | 225711 | 937  | 1112 | 0.005758 | 41.0523 | cl34561   | FimV superfamily                                                      |
| Zymps1_795199_Zp221_scaffold_100_8_00003          | superfamily | 367362 | 301  | 459  | 0.002325 | 41.0866 | cl26620   | Glutenin_hmw superfamily                                              |
| Marbr1_2001_MBM_05547                             | superfamily | 282904 | 1729 | 1898 | 0.006821 | 41.4404 | cl37540   | Herpes_BLLF1 superfamily                                              |
| Foner1_1692_transcript_OAP65721                   | superfamily | 237030 | 374  | 499  | 0.005545 | 39.8738 | cl36091   | kgd superfamily                                                       |
| Gyrinf1_909834_gm1_3287_g                         | superfamily | 425360 | 312  | 390  | 0.00067  | 42.3382 | cl41729   | KLF1_2_4_N superfamily                                                |
| Gyresc1_508977_gm1_648_g                          | superfamily | 425360 | 312  | 390  | 0.002525 | 40.4122 | cl41729   | KLF1_2_4_N superfamily                                                |
| Acchr1_5707_ACRE_045050T0                         | superfamily | 453886 | 348  | 387  | 0.003156 | 38.8078 | cl38911   | LGIC_TM superfamily                                                   |
| Exome1_108368_PV10_04372T0                        | superfamily | 431183 | 19   | 143  | 0.006949 | 38.1376 | cl10947   | Miga superfamily                                                      |
| Claps1_1788_A1O5_07176T0                          | superfamily | 451247 | 3    | 190  | 3.08E-81 | 259.63  | cl21454   | NADB_Rossmann superfamily<br>NBD_sugar-kinase_HSP70_actin superfamily |
| Penro1_2298_transcript_CDM28508                   | superfamily | 450142 | 397  | 456  | 0.00504  | 39.3314 | cl17037   |                                                                       |
| Altso1_122073_ASCLTG_875_jigsaw_mRNA_3            | specific    | 273555 | 801  | 1211 | 0        | 679.851 | TIGR01326 | OAH_OAS_sulphy                                                        |
| Alttom1_120644_ATMCTG_3360_jigsaw_mRNA_2          | specific    | 273555 | 735  | 1145 | 0        | 679.466 | TIGR01326 | OAH_OAS_sulphy                                                        |
| Altcar1_110133_ACMCTG_2300_jigsaw_mRNA_2          | specific    | 273555 | 778  | 1194 | 0        | 683.318 | TIGR01326 | OAH_OAS_sulphy                                                        |
| Aspcla1_92310_CE92309_4979                        | superfamily | 130689 | 343  | 503  | 0.001398 | 41.331  | cl31127   | PABP-1234 superfamily                                                 |
| Aspneo1_250479_gm1_3109_g                         | superfamily | 130689 | 325  | 453  | 2.85E-05 | 46.7238 | cl31127   | PABP-1234 superfamily                                                 |
| Umbpus1_106099_LPUS_04137T0                       | superfamily | 130689 | 350  | 485  | 4.27E-06 | 49.8054 | cl31127   | PABP-1234 superfamily                                                 |
| Pleav1_81383_fgenes1_pm_8_181                     | superfamily | 130689 | 327  | 482  | 1.34E-06 | 51.3462 | cl31127   | PABP-1234 superfamily                                                 |
| Geocar1_719842_fgenes1_pm_50_1_2                  | superfamily | 130689 | 427  | 559  | 1.04E-05 | 48.6498 | cl31127   | PABP-1234 superfamily                                                 |
| Sarco1_317451_CE317450_30874                      | superfamily | 130689 | 452  | 522  | 0.000258 | 44.0274 | cl31127   | PABP-1234 superfamily                                                 |
| Settur3_528262_fgenes1_pg_32_50                   | superfamily | 130689 | 609  | 751  | 0.000182 | 45.183  | cl31127   | PABP-1234 superfamily                                                 |
| Stasp1_126978_CE126977_15020                      | superfamily | 130689 | 275  | 387  | 4.29E-06 | 49.4202 | cl31127   | PABP-1234 superfamily                                                 |
| Settu3_177499_Settu1_estExt_fgenes_h1_pm_C_220032 | superfamily | 130689 | 328  | 470  | 0.000283 | 43.6422 | cl31127   | PABP-1234 superfamily                                                 |
| XylFL0594_14763_CE14762_41968                     | superfamily | 130689 | 293  | 427  | 0.006051 | 39.0198 | cl31127   | PABP-1234 superfamily                                                 |
| Pezech1_525593_fgenes1_pg_12_2_04                 | superfamily | 401645 | 251  | 426  | 1.16E-07 | 55.042  | cl37801   | PAT1 superfamily                                                      |
| Terbo2_781483_e_gw1_9_227_1                       | superfamily | 401645 | 256  | 402  | 0.000585 | 43.1008 | cl37801   | PAT1 superfamily                                                      |
| Tercla1_1267604_gm1_3364_g                        | superfamily | 401645 | 256  | 402  | 0.000208 | 44.6416 | cl37801   | PAT1 superfamily                                                      |
| Morcra1_867469_fgenes1_pm_7_19_7                  | superfamily | 401645 | 360  | 561  | 0.000248 | 44.2564 | cl37801   | PAT1 superfamily                                                      |
| Patat1_938356_e_gw1_13_343_1                      | superfamily | 401645 | 293  | 473  | 1.99E-06 | 50.8048 | cl37801   | PAT1 superfamily                                                      |
| Phcapit2_271027_CE271026_54591                    | superfamily | 401645 | 273  | 392  | 0.000522 | 43.1008 | cl37801   | PAT1 superfamily                                                      |
| Phcap1_117802_CE117801_56220                      | superfamily | 401645 | 273  | 392  | 0.000522 | 43.1008 | cl37801   | PAT1 superfamily                                                      |
| Pcap1_510433_gm1_4462_g                           | superfamily | 401645 | 273  | 392  | 0.000522 | 43.1008 | cl37801   | PAT1 superfamily                                                      |
| Phycap1_250501_e_gw1_5_1033_1                     | superfamily | 401645 | 273  | 392  | 0.000522 | 43.1008 | cl37801   | PAT1 superfamily                                                      |
| Phycapi2_433598_e_gw1_5_1393_1                    | superfamily | 401645 | 273  | 392  | 0.000522 | 43.1008 | cl37801   | PAT1 superfamily                                                      |
| Phcap1_200860_e_gw1_4_1020_1                      | superfamily | 401645 | 273  | 392  | 0.000522 | 43.1008 | cl37801   | PAT1 superfamily                                                      |
| Morana1_342348_CE342347_39092                     | superfamily | 401645 | 360  | 560  | 0.000167 | 45.0268 | cl37801   | PAT1 superfamily                                                      |
| Aplpr1_305098_fgenes1_pg_3_210                    | superfamily | 401645 | 275  | 421  | 1.03E-08 | 58.1236 | cl37801   | PAT1 superfamily                                                      |
| Psemus1_11370_transcript_KXT1488_7                | superfamily | 401645 | 362  | 520  | 0.000372 | 43.486  | cl37801   | PAT1 superfamily                                                      |

|                                                |             |        |     |      |          |         |         |                      |
|------------------------------------------------|-------------|--------|-----|------|----------|---------|---------|----------------------|
| Psemus1_11371_transcript_KXT14889              | superfamily | 401645 | 362 | 520  | 0.000372 | 43.486  | cl37801 | PAT1 superfamily     |
| Psemus1_11372_transcript_KXT14888              | superfamily | 401645 | 362 | 520  | 0.000372 | 43.486  | cl37801 | PAT1 superfamily     |
| Pyriof1_212081_CE212080_19094                  | superfamily | 401645 | 292 | 453  | 5.73E-07 | 52.7308 | cl37801 | PAT1 superfamily     |
| Loppic1_13540_CE13539_6173                     | superfamily | 401645 | 227 | 379  | 7.4E-05  | 45.7972 | cl37801 | PAT1 superfamily     |
| Stely1_1772_TW65_01665T0                       | superfamily | 401645 | 304 | 438  | 0.002388 | 40.7896 | cl37801 | PAT1 superfamily     |
| Phcit1_245431_fgenes1_pm_21_22                 | superfamily | 401645 | 264 | 470  | 1.09E-06 | 51.5752 | cl37801 | PAT1 superfamily     |
| Pcit17464_601907_fgenes1_pg_4_554              | superfamily | 401645 | 264 | 470  | 1.09E-06 | 51.5752 | cl37801 | PAT1 superfamily     |
| Pcit129764_388096_e_gw1_7_1368_1               | superfamily | 401645 | 241 | 470  | 3.52E-06 | 50.0344 | cl37801 | PAT1 superfamily     |
| Phcitr1_255200_fgenes1_pg_5_104                | superfamily | 401645 | 241 | 470  | 3.59E-06 | 50.0344 | cl37801 | PAT1 superfamily     |
| Fenfe1_103585_CE103584_36961                   | superfamily | 401645 | 340 | 468  | 7.48E-06 | 48.8788 | cl37801 | PAT1 superfamily     |
| Cucbe1_282185_e_gw1_3_3381_1                   | superfamily | 401645 | 285 | 433  | 9.01E-07 | 51.9604 | cl37801 | PAT1 superfamily     |
| Clael1_72108_CE72107_3255                      | superfamily | 401645 | 273 | 415  | 1.86E-07 | 54.2716 | cl37801 | PAT1 superfamily     |
| Dotsy1_28118_CE28117_2921                      | superfamily | 401645 | 323 | 494  | 8.17E-05 | 45.7972 | cl37801 | PAT1 superfamily     |
| Ophdi1_351325_estExt_Genewise1Pius_C_11_t30006 | superfamily | 401645 | 295 | 455  | 2.79E-06 | 50.4196 | cl37801 | PAT1 superfamily     |
| Stano2_5188_SNOG_01807_3                       | superfamily | 401645 | 247 | 455  | 8.3E-08  | 55.4272 | cl37801 | PAT1 superfamily     |
| Elsamp1_87450_CE87449_477                      | superfamily | 401645 | 323 | 495  | 2.29E-05 | 47.338  | cl37801 | PAT1 superfamily     |
| Conioc1_1211268_gm1_1916_g                     | superfamily | 401645 | 305 | 419  | 0.001881 | 41.1748 | cl37801 | PAT1 superfamily     |
| Cadmalm34_1_4977_IFR04_000311_1                | superfamily | 401645 | 296 | 467  | 0.000205 | 44.2564 | cl37801 | PAT1 superfamily     |
| Psehy1_488347_fgenes1_pg_13_267                | superfamily | 401645 | 269 | 413  | 6.03E-05 | 45.7972 | cl37801 | PAT1 superfamily     |
| Cadsp1_529889_fgenes1_pg_24_138                | superfamily | 401645 | 296 | 463  | 5.28E-05 | 46.1824 | cl37801 | PAT1 superfamily     |
| Horth1_4396_B0A50_05387                        | superfamily | 401645 | 314 | 466  | 3.26E-07 | 53.5012 | cl37801 | PAT1 superfamily     |
| Altca1_103524_ACSCCTG_1027_jigsaw mRNA_1       | superfamily | 177328 | 526 | 645  | 0.001864 | 40.8089 | cl26622 | PHA01929 superfamily |
| Altcar1_110133_ACMCTG_2300_jigsaw mRNA_2       | superfamily | 177328 | 523 | 642  | 0.000335 | 44.2757 | cl26622 | PHA01929 superfamily |
| Altcr1_108859_ACRCTG_236_jigsaw mRNA_1         | superfamily | 177328 | 526 | 645  | 0.001864 | 40.8089 | cl26622 | PHA01929 superfamily |
| Altma1_116654_AMRCTG_3100_jigsaw mRNA_1        | superfamily | 177328 | 390 | 509  | 0.000969 | 41.5793 | cl26622 | PHA01929 superfamily |
| Asptr1_106461_CE106460_13877                   | superfamily | 222997 | 342 | 494  | 0.005029 | 39.7459 | cl33716 | PHA03132 superfamily |
| Aspacr1_210844_gm1_8769_g                      | superfamily | 223021 | 251 | 498  | 1.82E-05 | 49.5517 | cl33720 | PHA03247 superfamily |
| Aspsim1_1_216309_MIX5629_34_45                 | superfamily | 223021 | 252 | 493  | 1.53E-06 | 53.0185 | cl33720 | PHA03247 superfamily |
| Aspsulp1_71449_CE71448_16168                   | superfamily | 223021 | 252 | 493  | 0.002062 | 41.0773 | cl33720 | PHA03247 superfamily |
| Aspnid1_5654_AN1052                            | superfamily | 223021 | 221 | 463  | 2.02E-06 | 51.0925 | cl33720 | PHA03247 superfamily |
| Aspfove1_146492_fgenes1_pm_1_155               | superfamily | 223021 | 221 | 463  | 2.84E-06 | 50.3221 | cl33720 | PHA03247 superfamily |
| Asppac1_77344_CE77343_13443                    | superfamily | 223021 | 248 | 495  | 4.36E-05 | 46.8553 | cl33720 | PHA03247 superfamily |
| Aspcorr1_11061_e_gw1_11_72_1                   | superfamily | 223021 | 216 | 463  | 2.06E-05 | 47.6257 | cl33720 | PHA03247 superfamily |
| Aspnav1_1_163417_CE163416_11985                | superfamily | 223021 | 251 | 537  | 5.34E-05 | 46.4701 | cl33720 | PHA03247 superfamily |
| Aspsy1_140011_e_gw1_1_554_1                    | superfamily | 223021 | 266 | 544  | 1.7E-05  | 48.0109 | cl33720 | PHA03247 superfamily |
| Aspten1_731120_gm1_1925_g                      | superfamily | 223021 | 270 | 504  | 6.77E-06 | 51.0925 | cl33720 | PHA03247 superfamily |
| Aspang1_948799_fgenes1_pm_6_47                 | superfamily | 223021 | 263 | 504  | 1.29E-05 | 49.9369 | cl33720 | PHA03247 superfamily |
| Aspaura1_203970_gm1_7400_g                     | superfamily | 223021 | 261 | 487  | 1.44E-05 | 49.9369 | cl33720 | PHA03247 superfamily |
| Asppuu1_242407_MIX1103_477_57                  | superfamily | 223021 | 263 | 504  | 2.39E-06 | 52.2481 | cl33720 | PHA03247 superfamily |
| Aspreb1_569476_gm1_777_g                       | superfamily | 223021 | 263 | 504  | 1.3E-06  | 53.4037 | cl33720 | PHA03247 superfamily |
| Aspauriat1_305250_MIX1778_78_46                | superfamily | 223021 | 254 | 550  | 0.002274 | 42.6181 | cl33720 | PHA03247 superfamily |
| Aspvar1_101094_CE101093_716                    | superfamily | 223021 | 250 | 490  | 1.89E-05 | 48.0109 | cl33720 | PHA03247 superfamily |
| Aspdef1_88007_MIX9481_28_69                    | superfamily | 223021 | 38  | 417  | 3.48E-05 | 47.2405 | cl33720 | PHA03247 superfamily |
| Aspins1_294536_fgenes1_pm_13_15                | superfamily | 223021 | 979 | 1215 | 0.000431 | 44.9293 | cl33720 | PHA03247 superfamily |
| Aspegy1_533726_fgenes1_pm_73_2                 | superfamily | 223021 | 980 | 1261 | 0.000455 | 44.9293 | cl33720 | PHA03247 superfamily |
| Aspspe1_1_182093_fgenes1_pm_2_66               | superfamily | 223021 | 979 | 1142 | 0.000328 | 45.3145 | cl33720 | PHA03247 superfamily |
| Aspth1_360369_fgenes1_pm_21_90                 | superfamily | 223021 | 992 | 1229 | 3.8E-05  | 48.3961 | cl33720 | PHA03247 superfamily |
| Aspoch1_453585_estExt_Genewise1_C_2_t30304     | superfamily | 223021 | 253 | 506  | 0.001189 | 42.2329 | cl33720 | PHA03247 superfamily |
| Asphey1_11489_fgenes1_pg_1_159                 | superfamily | 223021 | 264 | 505  | 4.21E-06 | 51.4777 | cl33720 | PHA03247 superfamily |
| Aspramb1_134084_CE134083_4844                  | superfamily | 223021 | 253 | 506  | 0.001189 | 42.2329 | cl33720 | PHA03247 superfamily |
| Aspram1_637_ARAM_003281T0                      | superfamily | 223021 | 253 | 506  | 0.001189 | 42.2329 | cl33720 | PHA03247 superfamily |
| Aspoch1432_1_5577_AOCH_007688T0                | superfamily | 223021 | 253 | 506  | 0.001189 | 42.2329 | cl33720 | PHA03247 superfamily |
| Aspamy1_170918_fgenes1_pm_20_14                | superfamily | 223021 | 988 | 1243 | 9.93E-06 | 50.3221 | cl33720 | PHA03247 superfamily |
| Aspcru1_386169_fgenes1_pm_8_44                 | superfamily | 223021 | 958 | 1106 | 0.000885 | 43.7737 | cl33720 | PHA03247 superfamily |
| Aspisr1_23698_gm1_2237_g                       | superfamily | 223021 | 304 | 514  | 1.19E-06 | 53.4037 | cl33720 | PHA03247 superfamily |
| Aspht1_65675_CE65674_586                       | superfamily | 223021 | 257 | 496  | 0.000143 | 44.9293 | cl33720 | PHA03247 superfamily |
| Asptan1_277045_CE277044_3113                   | superfamily | 223021 | 274 | 493  | 0.000117 | 45.3145 | cl33720 | PHA03247 superfamily |
| Aspkar1_164961_CE164960_437                    | superfamily | 223021 | 253 | 482  | 4.49E-08 | 56.4853 | cl33720 | PHA03247 superfamily |
| Aspneos1_31051_gm1_1922_g                      | superfamily | 223021 | 257 | 480  | 1.8E-05  | 48.0109 | cl33720 | PHA03247 superfamily |
| Aspave1_126501_fgenes1_pm_7_1                  | superfamily | 223021 | 266 | 475  | 0.000848 | 43.7737 | cl33720 | PHA03247 superfamily |
| Asptaic1_44404_CE44403_2726                    | superfamily | 223021 | 275 | 505  | 0.000342 | 43.7737 | cl33720 | PHA03247 superfamily |
| Aspca11822_1_403887_CE403886_12045             | superfamily | 223021 | 331 | 567  | 2.42E-08 | 57.6409 | cl33720 | PHA03247 superfamily |
| Aspca12550_1_279522_CE279521_11743             | superfamily | 223021 | 323 | 567  | 2.23E-09 | 61.1077 | cl33720 | PHA03247 superfamily |
| Aspca4_47456_CE47455_22447                     | superfamily | 223021 | 331 | 567  | 2.42E-08 | 57.6409 | cl33720 | PHA03247 superfamily |
| Aspstel1_1_190175_fgenes1_pm_32_25             | superfamily | 223021 | 266 | 447  | 5.41E-05 | 48.0109 | cl33720 | PHA03247 superfamily |
| Aspbr1_121725_e_gw1_4_363_1                    | superfamily | 223021 | 272 | 482  | 0.000722 | 42.6181 | cl33720 | PHA03247 superfamily |
| Aspfo1_130898_e_gw1_4_1507_1                   | superfamily | 223021 | 250 | 493  | 2.37E-05 | 47.6257 | cl33720 | PHA03247 superfamily |

|                                                  |             |        |     |      |          |         |         |                      |
|--------------------------------------------------|-------------|--------|-----|------|----------|---------|---------|----------------------|
| Aspflo1_185432_MIX4414_3_7                       | superfamily | 223021 | 269 | 565  | 1.03E-05 | 50.3221 | cl33720 | PHA03247 superfamily |
| Aspaste1_151675_gm1_4656_g                       | superfamily | 223021 | 250 | 494  | 4.44E-06 | 49.9369 | cl33720 | PHA03247 superfamily |
| Aspni7_1041677_CE41677_87                        | superfamily | 223021 | 267 | 534  | 5.15E-05 | 46.4701 | cl33720 | PHA03247 superfamily |
| Aspni_DSM_1_161772_An08g05100<br>m_01            | superfamily | 223021 | 251 | 518  | 7.25E-05 | 46.0849 | cl33720 | PHA03247 superfamily |
| Aspni_NRRL3_1_11142_NRRL3_111<br>42              | superfamily | 223021 | 251 | 518  | 7.25E-05 | 46.0849 | cl33720 | PHA03247 superfamily |
| Aspni_bvT_1_371413_estExt_Genem<br>ark1_C_220097 | superfamily | 223021 | 265 | 532  | 3.9E-05  | 46.8553 | cl33720 | PHA03247 superfamily |
| Aspneo1_296797_e_gw1_1_991_1                     | superfamily | 223021 | 259 | 480  | 9.16E-06 | 48.7813 | cl33720 | PHA03247 superfamily |
| Aspka1_1_18069_AKAW_06596                        | superfamily | 223021 | 250 | 493  | 2.37E-05 | 47.6257 | cl33720 | PHA03247 superfamily |
| Aspcos1_39787_CE39786_674                        | superfamily | 223021 | 250 | 515  | 4.96E-07 | 53.0185 | cl33720 | PHA03247 superfamily |
| Asptu1_186752_gm1_943_g                          | superfamily | 223021 | 250 | 494  | 4.44E-06 | 49.9369 | cl33720 | PHA03247 superfamily |
| Aspvad1_458789_gm1_10907_g                       | superfamily | 223021 | 250 | 515  | 6.35E-07 | 52.6333 | cl33720 | PHA03247 superfamily |
| Aspte1_439_ATET_00439                            | superfamily | 223021 | 269 | 498  | 0.000567 | 44.5441 | cl33720 | PHA03247 superfamily |
| Aspsep1_1895_CE1894_4325                         | superfamily | 223021 | 275 | 483  | 0.00048  | 43.3885 | cl33720 | PHA03247 superfamily |
| Asppip1_364706_e_gw1_3_133_1                     | superfamily | 223021 | 250 | 493  | 2.37E-05 | 47.6257 | cl33720 | PHA03247 superfamily |
| Aspscl1_239338_CE239337_3233                     | superfamily | 223021 | 257 | 504  | 4.95E-09 | 59.5669 | cl33720 | PHA03247 superfamily |
| Aspala1_143485_fggenesh1_pm_6_24<br>1            | superfamily | 223021 | 269 | 495  | 0.004452 | 41.4625 | cl33720 | PHA03247 superfamily |
| Aspeuc1_385688_fggenesh1_pg_4_29<br>0            | superfamily | 223021 | 250 | 515  | 2.44E-07 | 53.7889 | cl33720 | PHA03247 superfamily |
| Aspfili1_192200_fggenesh1_pm_27_31               | superfamily | 223021 | 963 | 1224 | 0.009192 | 40.6921 | cl33720 | PHA03247 superfamily |
| Aspcap1_131223_MIX9090_40_46                     | superfamily | 223021 | 238 | 453  | 4.06E-08 | 58.4113 | cl33720 | PHA03247 superfamily |
| Aspoc2036_1_566126_fggenesh1_pg_<br>1_1087       | superfamily | 223021 | 263 | 492  | 0.001374 | 41.8477 | cl33720 | PHA03247 superfamily |
| Aspwest1_39939_CE39938_1607                      | superfamily | 223021 | 285 | 547  | 0.007337 | 39.5365 | cl33720 | PHA03247 superfamily |
| Aspoli1_1_216478_fggenesh1_pm_302<br>_5          | superfamily | 223021 | 277 | 535  | 0.000442 | 44.9293 | cl33720 | PHA03247 superfamily |
| Aspses1_303851_gm1_4873_g                        | superfamily | 223021 | 285 | 495  | 0.004519 | 40.3069 | cl33720 | PHA03247 superfamily |
| Aspspi1_203311_CE203310_1886                     | superfamily | 223021 | 263 | 475  | 0.001405 | 41.8477 | cl33720 | PHA03247 superfamily |
| Aspscle1_60952_CE60951_3310                      | superfamily | 223021 | 256 | 478  | 0.000144 | 44.9293 | cl33720 | PHA03247 superfamily |
| Aspoc7043_1_650028_e_gw1_2_272<br>7_1            | superfamily | 223021 | 263 | 493  | 0.001317 | 41.8477 | cl33720 | PHA03247 superfamily |
| Asppet1_287634_gm1_4249_g                        | superfamily | 223021 | 263 | 493  | 0.001398 | 41.8477 | cl33720 | PHA03247 superfamily |
| Asppseute1_423105_e_gw1_195_254<br>1             | superfamily | 223021 | 269 | 498  | 0.002294 | 42.6181 | cl33720 | PHA03247 superfamily |
| PenchWisc1_1_140054_PCH_Pc13g<br>13200           | superfamily | 223021 | 295 | 454  | 0.001113 | 42.2329 | cl33720 | PHA03247 superfamily |
| Pench1_71076_e_gw1_2_1867_1                      | superfamily | 223021 | 295 | 454  | 0.001113 | 42.2329 | cl33720 | PHA03247 superfamily |
| Aspamb1_196250_fggenesh1_pm_51_<br>43            | superfamily | 223021 | 250 | 473  | 0.001553 | 43.0033 | cl33720 | PHA03247 superfamily |
| Aspfu_A1163_1_100335_CADAFUBT<br>00001201m_01    | superfamily | 223021 | 349 | 476  | 0.004515 | 40.3069 | cl33720 | PHA03247 superfamily |
| Aspfu1_1114_Afu1g12490_mRNA                      | superfamily | 223021 | 349 | 476  | 0.004515 | 40.3069 | cl33720 | PHA03247 superfamily |
| Aspall1_80143_CE80142_5066                       | superfamily | 223021 | 254 | 486  | 0.000199 | 44.5441 | cl33720 | PHA03247 superfamily |
| Aspfumig1_31904_CE31903_927                      | superfamily | 223021 | 350 | 485  | 0.001631 | 41.4625 | cl33720 | PHA03247 superfamily |
| Aspdur1_168944_CE168943_4122                     | superfamily | 223021 | 256 | 483  | 0.000832 | 42.6181 | cl33720 | PHA03247 superfamily |
| Neofi1_2680_7000001156973789                     | superfamily | 223021 | 270 | 476  | 0.000719 | 42.6181 | cl33720 | PHA03247 superfamily |
| Aspniv1_265238_fggenesh1_pm_6_10<br>5            | superfamily | 223021 | 273 | 505  | 1.29E-05 | 49.9369 | cl33720 | PHA03247 superfamily |
| Penja1_462785_gm1_1879_g                         | superfamily | 223021 | 260 | 453  | 0.000394 | 43.3885 | cl33720 | PHA03247 superfamily |
| Aspibe1_361274_e_gw1_34_83_1                     | superfamily | 223021 | 256 | 474  | 0.000278 | 44.1589 | cl33720 | PHA03247 superfamily |
| Aspfia1_245617_fggenesh1_pm_64_5                 | superfamily | 223021 | 282 | 489  | 9.41E-05 | 47.2405 | cl33720 | PHA03247 superfamily |
| Pengri1_8759_PGRI_052490T0                       | superfamily | 223021 | 247 | 478  | 0.008443 | 39.1513 | cl33720 | PHA03247 superfamily |
| Pencop1_8355_PENCOP_c008G006<br>65T0             | superfamily | 223021 | 245 | 471  | 9.11E-06 | 48.7813 | cl33720 | PHA03247 superfamily |
| Aspaurful1_476126_fggenesh1_pm_17<br>6           | superfamily | 223021 | 263 | 470  | 0.000208 | 46.0849 | cl33720 | PHA03247 superfamily |
| Asplup1_212861_fggenesh1_pm_90_8                 | superfamily | 223021 | 263 | 470  | 0.000208 | 46.0849 | cl33720 | PHA03247 superfamily |
| Aspcorea1_310722_CE310721_1046<br>7              | superfamily | 223021 | 263 | 475  | 0.001358 | 41.8477 | cl33720 | PHA03247 superfamily |
| Aspwak1_191096_CE191095_7131                     | superfamily | 223021 | 270 | 484  | 0.003324 | 40.6921 | cl33720 | PHA03247 superfamily |
| Aspgra1_431791_gm1_5108_g                        | superfamily | 223021 | 160 | 446  | 1.03E-06 | 51.8629 | cl33720 | PHA03247 superfamily |
| Penvul1_1379_PENVUL_c012G0196<br>2T0             | superfamily | 223021 | 251 | 471  | 0.000602 | 43.0033 | cl33720 | PHA03247 superfamily |
| Asppterr1_167696_fggenesh1_pm_27_<br>23          | superfamily | 223021 | 250 | 479  | 0.001852 | 42.6181 | cl33720 | PHA03247 superfamily |
| Aspjpap1_193436_CE193435_10940                   | superfamily | 223021 | 265 | 499  | 2.55E-05 | 47.2405 | cl33720 | PHA03247 superfamily |
| Aspvio1_69035_CE69034_4875                       | superfamily | 223021 | 265 | 519  | 3.06E-05 | 47.2405 | cl33720 | PHA03247 superfamily |
| Aspuva1_80164_CE80163_3826                       | superfamily | 223021 | 263 | 460  | 0.000898 | 42.2329 | cl33720 | PHA03247 superfamily |
| Aspacu1_316081_e_gw1_9_447_1                     | superfamily | 223021 | 263 | 460  | 3.24E-05 | 47.2405 | cl33720 | PHA03247 superfamily |
| Aspfior1_211278_gm1_9054_g                       | superfamily | 223021 | 257 | 449  | 5.46E-05 | 48.0109 | cl33720 | PHA03247 superfamily |
| Aspfij1_226471_CE226470_9810                     | superfamily | 223021 | 263 | 460  | 3.5E-05  | 46.8553 | cl33720 | PHA03247 superfamily |
| Aspoer1_40517_CE40516_11574                      | superfamily | 223021 | 270 | 476  | 0.000337 | 43.7737 | cl33720 | PHA03247 superfamily |
| Asppsev1_278958_gm1_9054_g                       | superfamily | 223021 | 257 | 476  | 0.001118 | 42.2329 | cl33720 | PHA03247 superfamily |
| Parbr1_531_PABG_00531m_01                        | superfamily | 223021 | 260 | 495  | 2.57E-06 | 50.7073 | cl33720 | PHA03247 superfamily |
| Byssp1_477_PVAR5_3672                            | superfamily | 223021 | 367 | 451  | 0.004763 | 39.9217 | cl33720 | PHA03247 superfamily |
| Penar1_7045_transcript_OGE56306                  | superfamily | 223021 | 288 | 501  | 0.000148 | 44.9293 | cl33720 | PHA03247 superfamily |
| Asphom1_105274_CE105273_3596                     | superfamily | 223021 | 265 | 479  | 8.49E-06 | 48.7813 | cl33720 | PHA03247 superfamily |
| Penla1_372272_fggenesh1_pg_4_254                 | superfamily | 223021 | 243 | 443  | 0.001558 | 41.4625 | cl33720 | PHA03247 superfamily |
| TalaHC1_1_1_55053_e_gw1_42_36_<br>1              | superfamily | 223021 | 257 | 479  | 0.000176 | 44.5441 | cl33720 | PHA03247 superfamily |
| Penoc1_8163_transcript_PCH04732                  | superfamily | 223021 | 257 | 478  | 2.94E-06 | 50.3221 | cl33720 | PHA03247 superfamily |
| Talpro1_357920_fggenesh1_pg_5_131                | superfamily | 223021 | 259 | 457  | 3.16E-06 | 50.3221 | cl33720 | PHA03247 superfamily |
| Aspchev1_6298_CE6297_4290                        | superfamily | 223021 | 252 | 473  | 0.000902 | 42.2329 | cl33720 | PHA03247 superfamily |
| Cocim1_4252_CIMG_06878T0                         | superfamily | 223021 | 260 | 469  | 0.000174 | 44.5441 | cl33720 | PHA03247 superfamily |
| Cocpo1_1_5086_XM_003070039_1                     | superfamily | 223021 | 260 | 468  | 5.98E-05 | 46.0849 | cl33720 | PHA03247 superfamily |
| Cocpos1_9541_transcript_EFW13885                 | superfamily | 223021 | 260 | 468  | 5.98E-05 | 46.0849 | cl33720 | PHA03247 superfamily |

|                                                    |             |        |      |      |          |         |         |          |             |
|----------------------------------------------------|-------------|--------|------|------|----------|---------|---------|----------|-------------|
| Aspund1_1_278765_fgenes1_pm_1_321                  | superfamily | 223021 | 254  | 623  | 5.23E-06 | 51.4777 | cl33720 | PHA03247 | superfamily |
| Aspund1_1_278765_fgenes1_pm_1_321                  | superfamily | 223021 | 1003 | 1232 | 0.000887 | 43.7737 | cl33720 | PHA03247 | superfamily |
| Gymau1_166894_gm1_4540_g                           | superfamily | 223021 | 252  | 553  | 0.000957 | 42.2329 | cl33720 | PHA03247 | superfamily |
| Aspfre1_153762_fgenes1_pm_76_17                    | superfamily | 223021 | 258  | 593  | 6.05E-05 | 47.6257 | cl33720 | PHA03247 | superfamily |
| Pezech1_525593_fgenes1_pg_12_204                   | superfamily | 223021 | 298  | 578  | 0.009257 | 39.5365 | cl33720 | PHA03247 | superfamily |
| Zoprh1_728341_fgenes1_pm_37_20                     | superfamily | 223021 | 277  | 527  | 2.44E-05 | 47.6257 | cl33720 | PHA03247 | superfamily |
| Delco1_476388_gm1_8841_g                           | superfamily | 223021 | 262  | 510  | 0.00059  | 43.0033 | cl33720 | PHA03247 | superfamily |
| Terbo2_781483_e_gw1_9_227_1                        | superfamily | 223021 | 348  | 533  | 7.37E-05 | 46.0849 | cl33720 | PHA03247 | superfamily |
| Pseel1_9633_g9265_t1                               | superfamily | 223021 | 246  | 513  | 1.4E-05  | 48.3961 | cl33720 | PHA03247 | superfamily |
| Tubcan1_941566_gm1_7117_g                          | superfamily | 223021 | 386  | 664  | 0.008815 | 39.5365 | cl33720 | PHA03247 | superfamily |
| Trepe1_264100_CE264099_38956                       | superfamily | 223021 | 244  | 527  | 3.41E-06 | 50.3221 | cl33720 | PHA03247 | superfamily |
| Artol1_8726_AOL_s00169g18m_01                      | superfamily | 223021 | 241  | 535  | 2.28E-05 | 47.6257 | cl33720 | PHA03247 | superfamily |
| Linin1_223675_e_gw1_14_456_1                       | superfamily | 223021 | 248  | 535  | 2.97E-06 | 50.7073 | cl33720 | PHA03247 | superfamily |
| Perma1_510121_e_gw1_1_175_1                        | superfamily | 223021 | 238  | 514  | 2.06E-06 | 51.0925 | cl33720 | PHA03247 | superfamily |
| Meltu1_674186_MIX21012_52815_93                    | superfamily | 223021 | 286  | 516  | 2.6E-07  | 54.1741 | cl33720 | PHA03247 | superfamily |
| Spaf1_891_NODE_11817_length_3265_cov_107_g7573_t1  | superfamily | 223021 | 316  | 451  | 0.000132 | 45.3145 | cl33720 | PHA03247 | superfamily |
| Bissp1_688847_gm1_9344_g                           | superfamily | 223021 | 285  | 470  | 0.000909 | 42.2329 | cl33720 | PHA03247 | superfamily |
| Tryvi1_440647_e_gw1_6_229_1                        | superfamily | 223021 | 406  | 508  | 0.003451 | 40.6921 | cl33720 | PHA03247 | superfamily |
| Ap1pr1_305098_fgenes1_pg_3_210                     | superfamily | 223021 | 246  | 565  | 0.00343  | 40.6921 | cl33720 | PHA03247 | superfamily |
| Wesor1_239609_CE239608_7653                        | superfamily | 223021 | 243  | 509  | 0.000546 | 43.3885 | cl33720 | PHA03247 | superfamily |
| XylPMI703_1_50236_CE50235_11322                    | superfamily | 223021 | 250  | 499  | 0.002118 | 41.0773 | cl33720 | PHA03247 | superfamily |
| Didsa1_87328_CE87327_10519                         | superfamily | 223021 | 244  | 529  | 9E-08    | 55.7149 | cl33720 | PHA03247 | superfamily |
| Phisu1_13225_transcript_CZR53787                   | superfamily | 223021 | 295  | 533  | 0.000471 | 43.3885 | cl33720 | PHA03247 | superfamily |
| Plemel1_105900_CE105899_14980                      | superfamily | 223021 | 401  | 573  | 0.006352 | 39.9217 | cl33720 | PHA03247 | superfamily |
| Myrian1_113607_CE113606_24589                      | superfamily | 223021 | 245  | 497  | 0.000145 | 44.9293 | cl33720 | PHA03247 | superfamily |
| Macan1_426874_fgenes1_pm_1_104                     | superfamily | 223021 | 243  | 533  | 0.000658 | 43.0033 | cl33720 | PHA03247 | superfamily |
| Podcur1_471017_estExt_fgenes1_pm_C_2000008         | superfamily | 223021 | 280  | 480  | 7.81E-07 | 52.2481 | cl33720 | PHA03247 | superfamily |
| Lopmy1_565459_gm1_11464_g                          | superfamily | 223021 | 279  | 796  | 0.009531 | 40.6921 | cl33720 | PHA03247 | superfamily |
| Bauco1_467987_CE306884_33891                       | superfamily | 223021 | 246  | 556  | 0.002089 | 41.4625 | cl33720 | PHA03247 | superfamily |
| Brefa1_321669_CE321668_14658                       | superfamily | 223021 | 295  | 532  | 0.006303 | 39.9217 | cl33720 | PHA03247 | superfamily |
| Torra1_29471_CE29470_6013                          | superfamily | 223021 | 306  | 480  | 0.000107 | 44.9293 | cl33720 | PHA03247 | superfamily |
| Acema1_744223_gm1_9971_g                           | superfamily | 223021 | 295  | 550  | 4.45E-05 | 46.8553 | cl33720 | PHA03247 | superfamily |
| Thian1_376562_e_gw1_5_559_1                        | superfamily | 223021 | 273  | 470  | 0.000456 | 43.3885 | cl33720 | PHA03247 | superfamily |
| Stely1_1772_TW65_01665T0                           | superfamily | 223021 | 241  | 562  | 0.00364  | 40.3069 | cl33720 | PHA03247 | superfamily |
| Clamic1_259668_CE259667_15531                      | superfamily | 223021 | 267  | 400  | 0.000277 | 44.1589 | cl33720 | PHA03247 | superfamily |
| Conli1_5219_NODE_2333_length_98482_cov_22_g3682_t1 | superfamily | 223021 | 281  | 569  | 3.03E-05 | 47.2405 | cl33720 | PHA03247 | superfamily |
| Pyryl1_572587_gm1_8264_g                           | superfamily | 223021 | 235  | 447  | 2.71E-05 | 47.2405 | cl33720 | PHA03247 | superfamily |
| Fenfe1_103585_CE103584_36961                       | superfamily | 223021 | 262  | 533  | 0.000395 | 43.7737 | cl33720 | PHA03247 | superfamily |
| Coclu2_16930_fgenes1_pg_3_118                      | superfamily | 223021 | 253  | 541  | 0.001422 | 41.8477 | cl33720 | PHA03247 | superfamily |
| Frisi1_753_B0A55_13085                             | superfamily | 223021 | 251  | 533  | 0.00164  | 41.8477 | cl33720 | PHA03247 | superfamily |
| Endpal1_8037_EPA1_010118_RA                        | superfamily | 223021 | 337  | 544  | 1.62E-05 | 48.0109 | cl33720 | PHA03247 | superfamily |
| EndpusZ1_700_EPUS_01261T0                          | superfamily | 223021 | 344  | 505  | 4.66E-06 | 49.9369 | cl33720 | PHA03247 | superfamily |
| PlePMI138_1_17761_CE17760_9229                     | superfamily | 223021 | 367  | 505  | 0.000861 | 42.6181 | cl33720 | PHA03247 | superfamily |
| Bombom1_28346_CE28345_31502                        | superfamily | 223021 | 260  | 492  | 2.63E-05 | 47.2405 | cl33720 | PHA03247 | superfamily |
| Podcom1_105258_CE105257_8637                       | superfamily | 223021 | 272  | 520  | 0.000379 | 43.3885 | cl33720 | PHA03247 | superfamily |
| Acrst1_1319294_fgenes1_pg_3_519                    | superfamily | 223021 | 285  | 468  | 0.00029  | 43.7737 | cl33720 | PHA03247 | superfamily |
| Cercau1_539525_fgenes1_pm_6_360                    | superfamily | 223021 | 265  | 519  | 2.82E-06 | 50.3221 | cl33720 | PHA03247 | superfamily |
| Thiap1_657363_fgenes1_pm_10_52                     | superfamily | 223021 | 293  | 520  | 0.000529 | 43.3885 | cl33720 | PHA03247 | superfamily |
| Sarstr1_318237_gm1_7241_g                          | superfamily | 223021 | 285  | 468  | 0.00029  | 43.7737 | cl33720 | PHA03247 | superfamily |
| Thiar1_720655_e_gw1_49_42_1                        | superfamily | 223021 | 311  | 558  | 0.000311 | 43.7737 | cl33720 | PHA03247 | superfamily |
| Lasov1_531640_e_gw1_5_695_1                        | superfamily | 223021 | 266  | 454  | 7.87E-05 | 45.6997 | cl33720 | PHA03247 | superfamily |
| Bombar1_479584_fgenes1_pg_2_1372                   | superfamily | 223021 | 266  | 504  | 0.001747 | 41.4625 | cl33720 | PHA03247 | superfamily |
| Podfim1_229309_CE229308_21346                      | superfamily | 223021 | 271  | 532  | 1.8E-05  | 48.0109 | cl33720 | PHA03247 | superfamily |
| Ternu1_200085_CE200084_22302                       | superfamily | 223021 | 247  | 444  | 1.53E-07 | 54.9445 | cl33720 | PHA03247 | superfamily |
| Melva1_584285_gm1_9590_g                           | superfamily | 223021 | 245  | 503  | 0.008219 | 39.1513 | cl33720 | PHA03247 | superfamily |
| Phisc1_676539_fgenes1_pg_30_238                    | superfamily | 223021 | 350  | 520  | 4.78E-05 | 46.4701 | cl33720 | PHA03247 | superfamily |
| Blugr2_1228_BLGH_00654_mRNA_1                      | superfamily | 223021 | 79   | 622  | 0.00194  | 41.4625 | cl33720 | PHA03247 | superfamily |
| Ceraff1_204517_CE204516_13089                      | superfamily | 223021 | 256  | 462  | 7.24E-05 | 45.6997 | cl33720 | PHA03247 | superfamily |
| Frisi1_9218_B0A55_01134                            | superfamily | 223021 | 251  | 538  | 1.87E-05 | 48.0109 | cl33720 | PHA03247 | superfamily |
| Apope1_536162_fgenes1_pg_6_822                     | superfamily | 223021 | 268  | 459  | 0.000165 | 44.5441 | cl33720 | PHA03247 | superfamily |
| Conioc1_1211268_gm1_1916_g                         | superfamily | 223021 | 354  | 594  | 0.005076 | 39.9217 | cl33720 | PHA03247 | superfamily |
| LecAK0013_1_445782_fgenes1_pm_1_821                | superfamily | 223021 | 265  | 522  | 7.78E-07 | 52.2481 | cl33720 | PHA03247 | superfamily |
| Corsim1_36236_e_gw1_8_179_1                        | superfamily | 223021 | 291  | 507  | 0.006761 | 39.5365 | cl33720 | PHA03247 | superfamily |
| Humgr1_8376_Humgr2_005231_RA                       | superfamily | 223021 | 287  | 504  | 1.7E-06  | 51.0925 | cl33720 | PHA03247 | superfamily |
| Rhier1_711537_gm1_15712_g                          | superfamily | 223021 | 248  | 472  | 2.38E-06 | 50.7073 | cl33720 | PHA03247 | superfamily |
| Lashi1_593299_fgenes1_pm_7_192                     | superfamily | 223021 | 263  | 487  | 2.32E-07 | 53.7889 | cl33720 | PHA03247 | superfamily |
| Beaba1_5501_BBA_05501m_01                          | superfamily | 223021 | 216  | 463  | 1.07E-07 | 54.9445 | cl33720 | PHA03247 | superfamily |
| Corbr1_271_transcript_OAA52430                     | superfamily | 223021 | 216  | 464  | 2.22E-06 | 50.7073 | cl33720 | PHA03247 | superfamily |
| Trias1_27876_gm1_5845_g                            | superfamily | 223021 | 217  | 465  | 2.76E-05 | 47.2405 | cl33720 | PHA03247 | superfamily |
| Fusmo1_297981_MIX209_22048_88                      | superfamily | 223021 | 318  | 460  | 3.65E-06 | 49.9369 | cl33720 | PHA03247 | superfamily |
| Rutfi1_709150_estExt_Genemark1_C_5_t10354          | superfamily | 223021 | 270  | 531  | 0.004025 | 40.3069 | cl33720 | PHA03247 | superfamily |
| Trikon1_147686_CE147685_25566                      | superfamily | 223021 | 250  | 475  | 0.000169 | 44.5441 | cl33720 | PHA03247 | superfamily |
| Tritai1_35748_CE35747_33467                        | superfamily | 223021 | 250  | 471  | 1.6E-06  | 51.0925 | cl33720 | PHA03247 | superfamily |
| Triei1_375552_gm1_7643_g                           | superfamily | 223021 | 217  | 467  | 0.00076  | 42.6181 | cl33720 | PHA03247 | superfamily |
| Triev1_193703_CE193702_27587                       | superfamily | 223021 | 217  | 466  | 0.000127 | 44.9293 | cl33720 | PHA03247 | superfamily |

|                                          |             |        |     |     |          |         |         |                      |
|------------------------------------------|-------------|--------|-----|-----|----------|---------|---------|----------------------|
| Trigam1_7763_TGAM01_07763T0              | superfamily | 223021 | 325 | 470 | 0.000583 | 43.0033 | cl33720 | PHA03247 superfamily |
| Apiver1_32826_CE32825_3250               | superfamily | 223021 | 266 | 547 | 7.47E-05 | 45.6997 | cl33720 | PHA03247 superfamily |
| Triatr1_496815_gm1_8124_g                | superfamily | 223021 | 251 | 469 | 0.000107 | 45.3145 | cl33720 | PHA03247 superfamily |
| Triatro1_441594_fgenes1_pg_10_356        | superfamily | 223021 | 251 | 469 | 0.000109 | 45.3145 | cl33720 | PHA03247 superfamily |
| Triatrov1_477853_MIX5214_25609_90        | superfamily | 223021 | 251 | 469 | 0.000107 | 45.3145 | cl33720 | PHA03247 superfamily |
| Colny1_1022682_mrna_14402                | superfamily | 223021 | 255 | 458 | 0.002023 | 41.0773 | cl33720 | PHA03247 superfamily |
| Myrin1_79802_CE79801_61490               | superfamily | 223021 | 216 | 467 | 3.45E-08 | 56.4853 | cl33720 | PHA03247 superfamily |
| Triat2_42972_Triat1_e_gw1_7_841_1        | superfamily | 223021 | 251 | 469 | 0.000121 | 44.9293 | cl33720 | PHA03247 superfamily |
| Fusma1_4031_transcript_CVL03167          | superfamily | 223021 | 315 | 472 | 0.000304 | 43.7737 | cl33720 | PHA03247 superfamily |
| llysp1_1084539_CE1084538_21146           | superfamily | 223021 | 311 | 452 | 4.63E-07 | 53.0185 | cl33720 | PHA03247 superfamily |
| llyeu1_674004_gm1_9830_g                 | superfamily | 223021 | 311 | 452 | 4.63E-07 | 53.0185 | cl33720 | PHA03247 superfamily |
| Fuspro1_1677_transcript_CZR35398         | superfamily | 223021 | 315 | 472 | 0.000299 | 43.7737 | cl33720 | PHA03247 superfamily |
| llyro1_145191_CE145190_3148              | superfamily | 223021 | 213 | 528 | 4E-08    | 56.8705 | cl33720 | PHA03247 superfamily |
| Cloros1_11678_CRV2T00007275_1            | superfamily | 223021 | 213 | 528 | 4.17E-08 | 56.4853 | cl33720 | PHA03247 superfamily |
| Tolpa1_4862_transcript_POR31872          | superfamily | 223021 | 443 | 584 | 9.31E-05 | 45.6997 | cl33720 | PHA03247 superfamily |
| FoxF207_1_9830_CE9829_20519              | superfamily | 223021 | 317 | 474 | 0.001078 | 41.8477 | cl33720 | PHA03247 superfamily |
| FusoxFo47_680_rna_gnl_WGS_AFM            | superfamily | 223021 | 317 | 474 | 0.001078 | 41.8477 | cl33720 | PHA03247 superfamily |
| M_mrna_FOZG_00553T0                      | superfamily | 223021 | 317 | 474 | 0.001078 | 41.8477 | cl33720 | PHA03247 superfamily |
| FusoxFo47_2_7966_CE7965_11391            | superfamily | 223021 | 317 | 474 | 0.001078 | 41.8477 | cl33720 | PHA03247 superfamily |
| Fusoxys1_817586_gm1_467_g                | superfamily | 223021 | 315 | 472 | 0.001305 | 41.8477 | cl33720 | PHA03247 superfamily |
| FoxMRL8996_17519_CE17518_37530           | superfamily | 223021 | 317 | 474 | 0.001075 | 41.8477 | cl33720 | PHA03247 superfamily |
| Fusox32931_5166_rna_gnl_WGS_AF           | superfamily | 223021 | 317 | 474 | 0.001075 | 41.8477 | cl33720 | PHA03247 superfamily |
| ML_mrna_FOYG_16257T0                     | superfamily | 223021 | 317 | 474 | 0.001075 | 41.8477 | cl33720 | PHA03247 superfamily |
| Fusoxalb1_841828_gm1_2377_g              | superfamily | 223021 | 317 | 474 | 0.001078 | 41.8477 | cl33720 | PHA03247 superfamily |
| Fusoxcon1_18427_rna_gnl_WGS_AG           | superfamily | 223021 | 317 | 474 | 0.001144 | 41.8477 | cl33720 | PHA03247 superfamily |
| NF_mrna_FOPG_01271T1                     | superfamily | 223021 | 317 | 474 | 0.001144 | 41.8477 | cl33720 | PHA03247 superfamily |
| Fusoxcub1_507_rna_gnl_WGS_AGN            | superfamily | 223021 | 316 | 473 | 0.001085 | 41.8477 | cl33720 | PHA03247 superfamily |
| D_mrna_FOIG_00370T0                      | superfamily | 223021 | 317 | 474 | 0.001075 | 41.8477 | cl33720 | PHA03247 superfamily |
| Fusox2_7216_FOXG_11273T0                 | superfamily | 223021 | 317 | 474 | 0.001075 | 41.8477 | cl33720 | PHA03247 superfamily |
| Fusoxlyc1_22724_rna_gnl_WGS_AG           | superfamily | 223021 | 317 | 474 | 0.001078 | 41.8477 | cl33720 | PHA03247 superfamily |
| BH_mrna_FOWG_08668T0                     | superfamily | 223021 | 317 | 474 | 0.001078 | 41.8477 | cl33720 | PHA03247 superfamily |
| FoxPHW726_1_56310_CE56309_30812          | superfamily | 223021 | 317 | 474 | 0.001078 | 41.8477 | cl33720 | PHA03247 superfamily |
| Fusoxmel1_681_rna_gnl_WGS_AGN            | superfamily | 223021 | 317 | 474 | 0.001075 | 41.8477 | cl33720 | PHA03247 superfamily |
| E_mrna_FOMG_00548T1                      | superfamily | 223021 | 317 | 474 | 0.001078 | 41.8477 | cl33720 | PHA03247 superfamily |
| FoxF1003_1_10862_CE10861_19680           | superfamily | 223021 | 317 | 474 | 0.001078 | 41.8477 | cl33720 | PHA03247 superfamily |
| FoxF1004_1_857176_fgenes1_pg_3484        | superfamily | 223021 | 317 | 474 | 0.001078 | 41.8477 | cl33720 | PHA03247 superfamily |
| FoxF1008_1_672978_e_gw1_1_4245_1         | superfamily | 223021 | 317 | 474 | 0.001078 | 41.8477 | cl33720 | PHA03247 superfamily |
| FoxF201_1_10463_CE10462_37755            | superfamily | 223021 | 317 | 474 | 0.001078 | 41.8477 | cl33720 | PHA03247 superfamily |
| FoxF202_1_202498_CE202497_25562          | superfamily | 223021 | 317 | 474 | 0.001078 | 41.8477 | cl33720 | PHA03247 superfamily |
| FoxF204_1_22202_CE22201_9918             | superfamily | 223021 | 317 | 474 | 0.001078 | 41.8477 | cl33720 | PHA03247 superfamily |
| FoxF206_1_91647_CE91646_17913            | superfamily | 223021 | 317 | 474 | 0.001078 | 41.8477 | cl33720 | PHA03247 superfamily |
| Fusco1_568337_fgenes1_pg_1_1549          | superfamily | 223021 | 306 | 473 | 0.000252 | 44.1589 | cl33720 | PHA03247 superfamily |
| Lepor2_291340_CE291339_6287              | superfamily | 223021 | 279 | 507 | 0.001331 | 41.8477 | cl33720 | PHA03247 superfamily |
| Leptod1_107922_CE107921_2780             | superfamily | 223021 | 279 | 507 | 0.001308 | 41.8477 | cl33720 | PHA03247 superfamily |
| Fusoxpis1_2823_rna_gnl_WGS_AGBI          | superfamily | 223021 | 317 | 474 | 0.001144 | 41.8477 | cl33720 | PHA03247 superfamily |
| _mrna_FOYG_01708T0                       | superfamily | 223021 | 317 | 474 | 0.001144 | 41.8477 | cl33720 | PHA03247 superfamily |
| Fusoxrap1_22710_rna_gnl_WGS_AG           | superfamily | 223021 | 317 | 474 | 0.001144 | 41.8477 | cl33720 | PHA03247 superfamily |
| NG_mrna_FOQG_05045T1                     | superfamily | 223021 | 317 | 474 | 0.001144 | 41.8477 | cl33720 | PHA03247 superfamily |
| FusoxFo47_679_rna_gnl_WGS_AFM            | superfamily | 223021 | 317 | 474 | 0.001078 | 41.8477 | cl33720 | PHA03247 superfamily |
| M_mrna_FOZG_00553T1                      | superfamily | 223021 | 317 | 474 | 0.001075 | 41.8477 | cl33720 | PHA03247 superfamily |
| Fusox32931_5164_rna_gnl_WGS_AF           | superfamily | 223021 | 317 | 474 | 0.001075 | 41.8477 | cl33720 | PHA03247 superfamily |
| ML_mrna_FOYG_16257T1                     | superfamily | 223021 | 317 | 474 | 0.001144 | 41.8477 | cl33720 | PHA03247 superfamily |
| Fusoxcon1_18425_rna_gnl_WGS_AG           | superfamily | 223021 | 317 | 474 | 0.001144 | 41.8477 | cl33720 | PHA03247 superfamily |
| NF_mrna_FOPG_01271T0                     | superfamily | 223021 | 317 | 474 | 0.001144 | 41.8477 | cl33720 | PHA03247 superfamily |
| Fusoxcub1_506_rna_gnl_WGS_AGN            | superfamily | 223021 | 316 | 473 | 0.001085 | 41.8477 | cl33720 | PHA03247 superfamily |
| D_mrna_FOIG_00370T1                      | superfamily | 223021 | 317 | 474 | 0.001075 | 41.8477 | cl33720 | PHA03247 superfamily |
| Fusox2_7214_FOXG_11273T1                 | superfamily | 223021 | 317 | 474 | 0.001075 | 41.8477 | cl33720 | PHA03247 superfamily |
| Fusoxmel1_680_rna_gnl_WGS_AGN            | superfamily | 223021 | 317 | 474 | 0.001075 | 41.8477 | cl33720 | PHA03247 superfamily |
| E_mrna_FOMG_00548T0                      | superfamily | 223021 | 317 | 474 | 0.001144 | 41.8477 | cl33720 | PHA03247 superfamily |
| FopisF105_1_363183_fgenes1_pm_22_16      | superfamily | 223021 | 317 | 474 | 0.001144 | 41.8477 | cl33720 | PHA03247 superfamily |
| Fusoxpis1_2825_rna_gnl_WGS_AGBI          | superfamily | 223021 | 317 | 474 | 0.001144 | 41.8477 | cl33720 | PHA03247 superfamily |
| _mrna_FOYG_01708T1                       | superfamily | 223021 | 317 | 474 | 0.001144 | 41.8477 | cl33720 | PHA03247 superfamily |
| Fusoxrad1_4480_rna_gnl_WGS_AGN           | superfamily | 223021 | 317 | 474 | 0.001078 | 41.8477 | cl33720 | PHA03247 superfamily |
| B_mrna_FOCG_12388T0                      | superfamily | 223021 | 317 | 474 | 0.001144 | 41.8477 | cl33720 | PHA03247 superfamily |
| Fusoxrap1_22711_rna_gnl_WGS_AG           | superfamily | 223021 | 317 | 474 | 0.001144 | 41.8477 | cl33720 | PHA03247 superfamily |
| NG_mrna_FOQG_05045T0                     | superfamily | 223021 | 316 | 473 | 0.001085 | 41.8477 | cl33720 | PHA03247 superfamily |
| Foxll5_1014246_CE14246_12356             | superfamily | 223021 | 250 | 472 | 2.91E-06 | 50.3221 | cl33720 | PHA03247 superfamily |
| Trim1_149191_CE149190_14445              | superfamily | 223021 | 250 | 474 | 9.49E-08 | 55.3297 | cl33720 | PHA03247 superfamily |
| Trieur1_274747_gm1_4621_g                | superfamily | 223021 | 311 | 452 | 5.93E-07 | 52.6333 | cl33720 | PHA03247 superfamily |
| llyrob1_530997_gm1_6101_g                | superfamily | 223021 | 312 | 452 | 0.000201 | 44.1589 | cl33720 | PHA03247 superfamily |
| Neora1_583931_e_gw1_13_553_1             | superfamily | 223021 | 315 | 472 | 0.000296 | 43.7737 | cl33720 | PHA03247 superfamily |
| Fusfu1_442_FFJJ_01649m_01                | superfamily | 223021 | 315 | 472 | 0.000396 | 43.3885 | cl33720 | PHA03247 superfamily |
| Fuspr1_5014_transcript_CVL04312          | superfamily | 223021 | 234 | 469 | 3.8E-08  | 56.4853 | cl33720 | PHA03247 superfamily |
| Nieex1_820865_gm1_1041_g                 | superfamily | 223021 | 347 | 489 | 0.000139 | 44.9293 | cl33720 | PHA03247 superfamily |
| Ophsi1_208_rna_G6O67_000189              | superfamily | 223021 | 267 | 505 | 0.000119 | 45.3145 | cl33720 | PHA03247 superfamily |
| TrireMAT11_1_4374_TRC1_004047_T1         | superfamily | 223021 | 267 | 505 | 0.000119 | 45.3145 | cl33720 | PHA03247 superfamily |
| TrireMAT12_1_4546_TRC2_004187_T1         | superfamily | 223021 | 267 | 505 | 0.000119 | 45.3145 | cl33720 | PHA03247 superfamily |
| Trire2_122284_estExt_fgenes5_pg_C_110199 | superfamily | 223021 | 267 | 511 | 1.57E-05 | 48.0109 | cl33720 | PHA03247 superfamily |

|                                       |             |        |     |     |          |         |         |                      |
|---------------------------------------|-------------|--------|-----|-----|----------|---------|---------|----------------------|
| Trilo3_1340338_e_gw1_14_551_1         | superfamily | 223021 | 322 | 499 | 8.03E-05 | 45.6997 | cl33720 | PHA03247 superfamily |
| Trior1_80298_CE80297_37724            | superfamily | 223021 | 322 | 508 | 0.00122  | 41.8477 | cl33720 | PHA03247 superfamily |
| Trilon1_201835_CE201834_35868         | superfamily | 223021 | 322 | 508 | 0.00122  | 41.8477 | cl33720 | PHA03247 superfamily |
| Tripa1_5949_ma8778                    | superfamily | 223021 | 216 | 486 | 0.000948 | 42.2329 | cl33720 | PHA03247 superfamily |
| Trica1_389511_gm1_930_g               | superfamily | 223021 | 327 | 477 | 2.23E-06 | 50.7073 | cl33720 | PHA03247 superfamily |
| Tricr1_279114_MIX3423_15528_26        | superfamily | 223021 | 250 | 460 | 6.55E-09 | 58.7965 | cl33720 | PHA03247 superfamily |
| Fustri1_619034_gm1_12299_g            | superfamily | 223021 | 312 | 478 | 0.000294 | 43.7737 | cl33720 | PHA03247 superfamily |
| Durrog2_93144_CE93143_18538           | superfamily | 223021 | 265 | 455 | 5.1E-05  | 46.0849 | cl33720 | PHA03247 superfamily |
| Cormi1_4520_CCM_04531m_01             | superfamily | 223021 | 607 | 796 | 1.62E-06 | 52.2481 | cl33720 | PHA03247 superfamily |
| Fusoxvas1_24674_rna_gnl_WGS_AG        | superfamily | 223021 | 317 | 474 | 0.001069 | 41.8477 | cl33720 | PHA03247 superfamily |
| NC_mrna_FOTG_05490T1                  | superfamily | 223021 | 317 | 474 | 0.001069 | 41.8477 | cl33720 | PHA03247 superfamily |
| Fusoxvas1_24675_rna_gnl_WGS_AG        | superfamily | 223021 | 317 | 474 | 0.001069 | 41.8477 | cl33720 | PHA03247 superfamily |
| NC_mrna_FOTG_05490T0                  | superfamily | 223021 | 317 | 474 | 0.001069 | 41.8477 | cl33720 | PHA03247 superfamily |
| Trist1_319629_gm1_2381_g              | superfamily | 223021 | 216 | 482 | 0.002169 | 41.0773 | cl33720 | PHA03247 superfamily |
| FoxF1010_1_19694_CE19693_3882         | superfamily | 223021 | 317 | 474 | 0.001069 | 41.8477 | cl33720 | PHA03247 superfamily |
| Fusve2_4999_FVEG_09521T0              | superfamily | 223021 | 316 | 473 | 0.000533 | 43.0033 | cl33720 | PHA03247 superfamily |
| Triveli1_95866_CE95865_14382          | superfamily | 223021 | 243 | 462 | 0.000171 | 44.5441 | cl33720 | PHA03247 superfamily |
| Triros1_971536_gm4_8713_g             | superfamily | 223021 | 245 | 472 | 7.61E-09 | 58.7965 | cl33720 | PHA03247 superfamily |
| Trsp14807_92247_CE92246_9178          | superfamily | 223021 | 250 | 483 | 6.3E-05  | 46.0849 | cl33720 | PHA03247 superfamily |
| TriTUC5505_1_383686_fgenes1_pm        | superfamily | 223021 | 250 | 472 | 0.000353 | 43.7737 | cl33720 | PHA03247 superfamily |
| _29_3                                 | superfamily | 223021 | 250 | 472 | 0.000353 | 43.7737 | cl33720 | PHA03247 superfamily |
| Trispi1_2_22129_gm1_9947_g            | superfamily | 223021 | 216 | 490 | 4.87E-11 | 65.73   | cl33720 | PHA03247 superfamily |
| Triv1_84136_CE84135_16229             | superfamily | 223021 | 245 | 472 | 2.02E-06 | 51.0925 | cl33720 | PHA03247 superfamily |
| Tripa1_183132_CE183131_17030          | superfamily | 223021 | 316 | 469 | 0.000231 | 44.1589 | cl33720 | PHA03247 superfamily |
| TriharM10_1_111581_CE111580_256       | superfamily | 223021 | 326 | 482 | 0.000272 | 44.1589 | cl33720 | PHA03247 superfamily |
| 85                                    | superfamily | 223021 | 326 | 482 | 0.000272 | 44.1589 | cl33720 | PHA03247 superfamily |
| Tricae1_276620_fgenes1_pm_20_2        | superfamily | 223021 | 238 | 423 | 0.001722 | 41.4625 | cl33720 | PHA03247 superfamily |
| 5                                     | superfamily | 223021 | 238 | 423 | 0.001722 | 41.4625 | cl33720 | PHA03247 superfamily |
| Tricam1_79553_CE79552_12088           | superfamily | 223021 | 250 | 483 | 6.3E-05  | 46.0849 | cl33720 | PHA03247 superfamily |
| Trice1_97673_CE97672_20410            | superfamily | 223021 | 247 | 476 | 0.001433 | 41.8477 | cl33720 | PHA03247 superfamily |
| Trich1_54856_CE54855_19526            | superfamily | 223021 | 232 | 486 | 1.35E-07 | 54.9445 | cl33720 | PHA03247 superfamily |
| Tricre1_29731_CE29730_19030           | superfamily | 223021 | 258 | 500 | 3.84E-07 | 53.4037 | cl33720 | PHA03247 superfamily |
| FoxFo5176_237899_e_gw1_1_3805_1       | superfamily | 223021 | 317 | 474 | 0.001116 | 41.8477 | cl33720 | PHA03247 superfamily |
| Fusre1_533157_fgenes1_pg_1_1533       | superfamily | 223021 | 316 | 473 | 0.000459 | 43.3885 | cl33720 | PHA03247 superfamily |
| Marbr1_2001_MBM_05547                 | superfamily | 223021 | 753 | 878 | 0.006926 | 41.8477 | cl33720 | PHA03247 superfamily |
| Ophau1_7668_transcript_PHH61977       | superfamily | 223021 | 281 | 443 | 0.000942 | 42.2329 | cl33720 | PHA03247 superfamily |
| Corco1_4062_transcript_OAA79537       | superfamily | 223021 | 247 | 459 | 8.95E-07 | 51.8629 | cl33720 | PHA03247 superfamily |
| Annbov1_15394_CE15393_55186           | superfamily | 223021 | 246 | 441 | 6.71E-05 | 45.6997 | cl33720 | PHA03247 superfamily |
| Tolop1_2918_transcript_KND94420       | superfamily | 223021 | 324 | 464 | 3.12E-05 | 46.8553 | cl33720 | PHA03247 superfamily |
| DalEC12_1_15846_fgenes1_pg_38_93      | superfamily | 223021 | 264 | 501 | 3.08E-05 | 46.8553 | cl33720 | PHA03247 superfamily |
| Dales1_231116_CE231115_24740          | superfamily | 223021 | 264 | 501 | 3.19E-05 | 46.8553 | cl33720 | PHA03247 superfamily |
| Triveli1_116405_CE116404_27813        | superfamily | 223021 | 244 | 459 | 9.75E-05 | 45.3145 | cl33720 | PHA03247 superfamily |
| Daldec1_76352_CE76351_11485           | superfamily | 223021 | 267 | 506 | 3.26E-05 | 46.8553 | cl33720 | PHA03247 superfamily |
| DallocaZ0526_2_491174_fgenes1_pm_4_45 | superfamily | 223021 | 264 | 503 | 6.57E-05 | 45.6997 | cl33720 | PHA03247 superfamily |
| Dalloca1_7370_CE7369_27415            | superfamily | 223021 | 267 | 506 | 6.19E-05 | 46.0849 | cl33720 | PHA03247 superfamily |
| Dalloca1_385168_gm1_3136_g            | superfamily | 223021 | 246 | 503 | 0.000135 | 44.9293 | cl33720 | PHA03247 superfamily |
| Daiver1_255059_fgenes1_pm_52_7        | superfamily | 223021 | 264 | 503 | 1.99E-05 | 47.6257 | cl33720 | PHA03247 superfamily |
| AnFL0455_493303_gm1_4931_g            | superfamily | 223021 | 253 | 428 | 1.13E-05 | 48.3961 | cl33720 | PHA03247 superfamily |
| Antru1_459783_gm1_4831_g              | superfamily | 223021 | 253 | 428 | 2.74E-05 | 47.2405 | cl33720 | PHA03247 superfamily |
| Anmae1_45012_CE45011_28794            | superfamily | 223021 | 253 | 428 | 0.007951 | 39.1513 | cl33720 | PHA03247 superfamily |
| Roster1_491119_gm1_3272_g             | superfamily | 223021 | 253 | 428 | 5.56E-05 | 46.0849 | cl33720 | PHA03247 superfamily |
| Fox26365_1_219679_e_gw1_102_20_2_1    | superfamily | 223021 | 317 | 474 | 0.001194 | 41.8477 | cl33720 | PHA03247 superfamily |
| Dalba1_206614_CE206613_121492         | superfamily | 223021 | 264 | 503 | 4.96E-05 | 46.4701 | cl33720 | PHA03247 superfamily |
| Dalca1_455708_gm1_1768_g              | superfamily | 223021 | 246 | 502 | 0.001204 | 41.8477 | cl33720 | PHA03247 superfamily |
| DaFL1419_1_263004_CE263003_20389      | superfamily | 223021 | 243 | 481 | 6.72E-10 | 61.8781 | cl33720 | PHA03247 superfamily |
| Hypvin1_420688_gm1_7240_g             | superfamily | 223021 | 242 | 463 | 1.64E-05 | 47.6257 | cl33720 | PHA03247 superfamily |
| Hypcer1_28304_CE28303_27475           | superfamily | 223021 | 294 | 426 | 0.002579 | 40.6921 | cl33720 | PHA03247 superfamily |
| Trifer1_124037_CE124036_3129          | superfamily | 223021 | 250 | 490 | 4.68E-08 | 56.1001 | cl33720 | PHA03247 superfamily |
| HypEC38_3_218143_CE218142_6775        | superfamily | 223021 | 264 | 465 | 0.007316 | 39.1513 | cl33720 | PHA03247 superfamily |
| Hyptru1_257438_CE257437_19076         | superfamily | 223021 | 262 | 465 | 1.72E-05 | 47.6257 | cl33720 | PHA03247 superfamily |
| Hypmon1_151734_CE151733_33905         | superfamily | 223021 | 241 | 431 | 0.000865 | 42.2329 | cl33720 | PHA03247 superfamily |
| HypCI4A_1_11670_gm1_5097_g            | superfamily | 223021 | 241 | 444 | 9.65E-06 | 48.3961 | cl33720 | PHA03247 superfamily |
| HyNC0597_1_665168_gm1_6352_g          | superfamily | 223021 | 253 | 453 | 0.004135 | 39.9217 | cl33720 | PHA03247 superfamily |
| Torhe1_7864_VHEMI07320_1              | superfamily | 223021 | 222 | 474 | 0.005621 | 39.5365 | cl33720 | PHA03247 superfamily |
| Biscog1_582007_fgenes1_pm_5_97        | superfamily | 223021 | 263 | 474 | 0.000333 | 43.3885 | cl33720 | PHA03247 superfamily |
| Stachl1_1953_transcript_KFA68696      | superfamily | 223021 | 241 | 477 | 4.69E-05 | 46.4701 | cl33720 | PHA03247 superfamily |
| Stach1_3582_transcript_KFA78415       | superfamily | 223021 | 214 | 476 | 0.000305 | 43.7737 | cl33720 | PHA03247 superfamily |
| Tri5649_1_410667_MIX764_13999_28      | superfamily | 223021 | 234 | 455 | 1.64E-06 | 51.0925 | cl33720 | PHA03247 superfamily |
| Tricac1_93302_CE93301_46071           | superfamily | 223021 | 249 | 470 | 0.004624 | 39.9217 | cl33720 | PHA03247 superfamily |
| HyNC1633_2_645930_MIX145_47814_43     | superfamily | 223021 | 262 | 460 | 0.000253 | 44.1589 | cl33720 | PHA03247 superfamily |
| Bisma1_8065_CE8064_29551              | superfamily | 223021 | 280 | 442 | 1.18E-06 | 51.4777 | cl33720 | PHA03247 superfamily |
| Stael1_407963_fgenes1_pg_5_308        | superfamily | 223021 | 242 | 475 | 1.07E-05 | 48.3961 | cl33720 | PHA03247 superfamily |
| Bisma1_497477_CE497476_71981          | superfamily | 223021 | 263 | 426 | 0.001645 | 41.4625 | cl33720 | PHA03247 superfamily |
| Bismed1_554000_CE553999_75360         | superfamily | 223021 | 263 | 426 | 0.000342 | 43.3885 | cl33720 | PHA03247 superfamily |
| Bisnum1_629819_gm1_117_g              | superfamily | 223021 | 264 | 475 | 7.04E-06 | 49.1665 | cl33720 | PHA03247 superfamily |
| Aspac1_56272_fgenes1_pg_1_499         | superfamily | 223021 | 223 | 418 | 0.000105 | 45.3145 | cl33720 | PHA03247 superfamily |
| XyIFL1019_157986_CE157985_13922       | superfamily | 223021 | 249 | 470 | 1.75E-07 | 54.1741 | cl33720 | PHA03247 superfamily |
| Hypsub2_39212_CE39211_136770          | superfamily | 223021 | 232 | 423 | 0.000489 | 43.0033 | cl33720 | PHA03247 superfamily |
| Plecuc1_325164_gm1_2614_g             | superfamily | 223021 | 236 | 514 | 0.000933 | 42.2329 | cl33720 | PHA03247 superfamily |



|                                                     |             |        |      |      |          |         |         |          |             |
|-----------------------------------------------------|-------------|--------|------|------|----------|---------|---------|----------|-------------|
| XyFL1777_1_789937_MIX310_22736_36                   | superfamily | 223021 | 320  | 505  | 0.000113 | 45.3145 | cl33720 | PHA03247 | superfamily |
| Nemani1_447901_gm1_2068_g                           | superfamily | 223021 | 255  | 430  | 0.002327 | 40.6921 | cl33720 | PHA03247 | superfamily |
| Exosi1_113065_PV11_01710T0                          | superfamily | 223021 | 286  | 537  | 0.000724 | 42.6181 | cl33720 | PHA03247 | superfamily |
| Xylint1_212825_CE212824_24453                       | superfamily | 223021 | 302  | 513  | 0.002131 | 41.0773 | cl33720 | PHA03247 | superfamily |
| NsAZ0576_1_331099_fgenesh1_pm_9_65                  | superfamily | 223021 | 261  | 403  | 0.000644 | 42.6181 | cl33720 | PHA03247 | superfamily |
| Aspwl1_165777_gm1_1026_g                            | superfamily | 223021 | 204  | 437  | 0.000292 | 43.7737 | cl33720 | PHA03247 | superfamily |
| Achstr1_486122_fgenesh1_pm_5_452                    | superfamily | 223021 | 226  | 463  | 1.45E-08 | 57.6409 | cl33720 | PHA03247 | superfamily |
| Necsp1_470146_estExt_fgenesh1_pg_C_130260           | superfamily | 223021 | 300  | 432  | 8.58E-06 | 48.7813 | cl33720 | PHA03247 | superfamily |
| Melsp1_168542_fgenesh1_pg_2_849                     | superfamily | 223021 | 272  | 513  | 3.95E-05 | 46.8553 | cl33720 | PHA03247 | superfamily |
| Asptri1_201493_fgenesh1_pm_666_1                    | superfamily | 223021 | 232  | 429  | 2.65E-05 | 48.7813 | cl33720 | PHA03247 | superfamily |
| Cytch1_183573_CE183572_13320                        | superfamily | 223021 | 298  | 529  | 5.69E-06 | 49.5517 | cl33720 | PHA03247 | superfamily |
| Diahe1_13017_transcript_POS72540                    | superfamily | 223021 | 288  | 497  | 2.03E-05 | 47.6257 | cl33720 | PHA03247 | superfamily |
| DiaPM1573_1_600869_fgenesh1_pm_6_368                | superfamily | 223021 | 260  | 483  | 8.02E-07 | 52.2481 | cl33720 | PHA03247 | superfamily |
| Neodi1_11955_AK830_g6177T0                          | superfamily | 223021 | 251  | 455  | 3.19E-06 | 50.3221 | cl33720 | PHA03247 | superfamily |
| Phiatt1_6889_AB675_2981T0                           | superfamily | 223021 | 125  | 351  | 0.009293 | 38.3809 | cl33720 | PHA03247 | superfamily |
| Phach1_4759_rna4758                                 | superfamily | 223021 | 305  | 458  | 0.004414 | 39.9217 | cl33720 | PHA03247 | superfamily |
| Colch1_2705_mrna_6672                               | superfamily | 223021 | 270  | 476  | 1.01E-09 | 61.4929 | cl33720 | PHA03247 | superfamily |
| Diaam1_9062_rna9092                                 | superfamily | 223021 | 204  | 433  | 0.001677 | 41.0773 | cl33720 | PHA03247 | superfamily |
| Fusoxpis1_2824_rna_gnl_WGS_AGBI_mrna_FOVG_01708T2   | superfamily | 223021 | 194  | 351  | 0.000599 | 42.2329 | cl33720 | PHA03247 | superfamily |
| Fusoxrap1_22712_rna_gnl_WGS_AG_NG_mrna_FOVG_05045T2 | superfamily | 223021 | 194  | 351  | 0.000599 | 42.2329 | cl33720 | PHA03247 | superfamily |
| Fusoxvas1_24673_rna_gnl_WGS_AG_NC_mrna_FOTG_05490T2 | superfamily | 223021 | 194  | 351  | 0.000599 | 42.2329 | cl33720 | PHA03247 | superfamily |
| Fusox32931_5165_rna_gnl_WGS_AF_ML_mrna_FOVG_16257T2 | superfamily | 223021 | 194  | 351  | 0.000581 | 42.2329 | cl33720 | PHA03247 | superfamily |
| Fusoxcon1_18426_rna_gnl_WGS_AG_NF_mrna_FOPG_01271T2 | superfamily | 223021 | 194  | 351  | 0.000599 | 42.2329 | cl33720 | PHA03247 | superfamily |
| Fusoxcub1_505_rna_gnl_WGS_AGN_D_mrna_FOIG_00370T2   | superfamily | 223021 | 193  | 350  | 0.000538 | 42.6181 | cl33720 | PHA03247 | superfamily |
| Fusox2_7215_FOXG_11273T2                            | superfamily | 223021 | 194  | 351  | 0.000581 | 42.2329 | cl33720 | PHA03247 | superfamily |
| Fusoxmel1_682_rna_gnl_WGS_AGN_E_mrna_FOMG_00548T2   | superfamily | 223021 | 194  | 351  | 0.000581 | 42.2329 | cl33720 | PHA03247 | superfamily |
| FusoxFo47_678_rna_gnl_WGS_AFM_M_mrna_FOZG_00553T2   | superfamily | 223021 | 194  | 351  | 0.000569 | 42.2329 | cl33720 | PHA03247 | superfamily |
| Aspspe1_1_182093_fgenesh1_pm_2_66                   | superfamily | 165527 | 280  | 416  | 0.001282 | 42.7932 | cl29788 | PHA03269 | superfamily |
| Asphey1_11489_fgenesh1_pg_1_159                     | superfamily | 165527 | 1041 | 1166 | 1.26E-05 | 49.3416 | cl29788 | PHA03269 | superfamily |
| Asphor1_149261_fgenesh1_pm_8_33                     | superfamily | 165527 | 273  | 424  | 0.00015  | 45.8748 | cl29788 | PHA03269 | superfamily |
| Crymi1_11110_B0A49_09347                            | superfamily | 165527 | 413  | 538  | 0.008259 | 38.9412 | cl29788 | PHA03269 | superfamily |
| Fusoxy1_597928_fgenesh1_pm_15_59                    | superfamily | 165527 | 352  | 425  | 0.008209 | 38.556  | cl29788 | PHA03269 | superfamily |
| FopisF109_1_845875_fgenesh1_pm_5_299                | superfamily | 165527 | 327  | 443  | 0.000332 | 43.1784 | cl29788 | PHA03269 | superfamily |
| FopisF23_1_365624_MIX1515_347_26                    | superfamily | 165527 | 327  | 443  | 0.000332 | 43.1784 | cl29788 | PHA03269 | superfamily |
| FopisF79_1_630649_fgenesh1_pm_3_63                  | superfamily | 165527 | 327  | 443  | 0.000332 | 43.1784 | cl29788 | PHA03269 | superfamily |
| FusoxT415_591516_gm1_1648_g                         | superfamily | 165527 | 327  | 443  | 0.000332 | 43.1784 | cl29788 | PHA03269 | superfamily |
| Fobas23_1_530936_fgenesh1_pm_1_351                  | superfamily | 165527 | 327  | 443  | 0.000332 | 43.1784 | cl29788 | PHA03269 | superfamily |
| Foxbas1_466001_fgenesh1_pm_18_178                   | superfamily | 165527 | 327  | 443  | 0.000332 | 43.1784 | cl29788 | PHA03269 | superfamily |
| Cryan3_116812_CE116811_9156                         | superfamily | 165527 | 424  | 542  | 0.000128 | 44.7192 | cl29788 | PHA03269 | superfamily |
| Verdah1_161901_CE161900_8651                        | superfamily | 165527 | 301  | 391  | 0.006776 | 39.3264 | cl29788 | PHA03269 | superfamily |
| Verda1_2281_VDAG_06763T0                            | superfamily | 165527 | 301  | 391  | 0.006776 | 39.3264 | cl29788 | PHA03269 | superfamily |
| Verdah1_131402_CE131401_8651                        | superfamily | 165527 | 301  | 391  | 0.006776 | 39.3264 | cl29788 | PHA03269 | superfamily |
| Verlo1_3793_transcript_CRK14601                     | superfamily | 165527 | 301  | 391  | 0.006735 | 39.3264 | cl29788 | PHA03269 | superfamily |
| Cryan3_349102_CE349101_9152                         | superfamily | 165527 | 423  | 541  | 0.000133 | 44.7192 | cl29788 | PHA03269 | superfamily |
| Asphai1_405932_fgenesh1_pm_168_3                    | superfamily | 223039 | 359  | 689  | 5.14E-06 | 50.9401 | cl33723 | PHA03307 | superfamily |
| Aspcap1_131223_MIX9090_40_46                        | superfamily | 223039 | 265  | 726  | 0.00389  | 41.6953 | cl33723 | PHA03307 | superfamily |
| Aspfla1_245617_fgenesh1_pm_64_5                     | superfamily | 223039 | 348  | 700  | 0.001121 | 43.6213 | cl33723 | PHA03307 | superfamily |
| Aspaurful1_476126_fgenesh1_pm_17_6                  | superfamily | 223039 | 350  | 774  | 0.007192 | 40.9249 | cl33723 | PHA03307 | superfamily |
| Asplup1_212861_fgenesh1_pm_90_8                     | superfamily | 223039 | 350  | 774  | 0.007192 | 40.9249 | cl33723 | PHA03307 | superfamily |
| Colph1_458935_fgenesh1_pm_5_125                     | superfamily | 223039 | 228  | 497  | 0.000798 | 42.4657 | cl33723 | PHA03307 | superfamily |
| Dreco1_2321_transcript_KYK61174                     | superfamily | 223039 | 229  | 449  | 3.8E-05  | 46.7029 | cl33723 | PHA03307 | superfamily |
| Chame1_432602_MIX12905_26049_89                     | superfamily | 223061 | 259  | 384  | 0.00481  | 39.5973 | cl25753 | PHA03369 | superfamily |
| Cyloi1_87008_CE87007_18919                          | superfamily | 223061 | 313  | 419  | 0.004419 | 39.5973 | cl25753 | PHA03369 | superfamily |
| Plecu1_139916_CE139915_7477                         | superfamily | 223061 | 315  | 445  | 0.000376 | 43.0641 | cl25753 | PHA03369 | superfamily |
| Lopnit1_1_412517_CE412516_5305                      | superfamily | 177614 | 315  | 503  | 0.001771 | 41.1916 | cl31823 | PHA03377 | superfamily |
| Alto1_257016_ALGCTG_2604_jigsaw_mRNA_59             | superfamily | 177614 | 233  | 508  | 0.001831 | 41.1916 | cl31823 | PHA03377 | superfamily |
| Apibac1_412807_gm1_6953_g                           | superfamily | 177614 | 271  | 499  | 0.00119  | 41.962  | cl31823 | PHA03377 | superfamily |
| Colorb1_138431_mrna_4951                            | superfamily | 177614 | 232  | 527  | 0.000747 | 42.3472 | cl31823 | PHA03377 | superfamily |
| Lompr1_5587_transcript_PKS06982                     | superfamily | 223065 | 322  | 485  | 0.006383 | 39.28   | cl33729 | PHA03378 | superfamily |
| Delst1_367146_fgenesh1_pg_3_413                     | superfamily | 223065 | 295  | 484  | 0.001305 | 41.5912 | cl33729 | PHA03378 | superfamily |
| Metro1_1712_MAA_01811T0                             | superfamily | 223066 | 219  | 496  | 3.63E-05 | 46.5901 | cl33730 | PHA03379 | superfamily |
| Metbr1_4315_XM_014691346_1                          | superfamily | 223066 | 219  | 496  | 0.000159 | 44.6641 | cl33730 | PHA03379 | superfamily |
| Metani1_7547_transcript_KID67184                    | superfamily | 223066 | 219  | 495  | 0.001076 | 41.9677 | cl33730 | PHA03379 | superfamily |
| Aspstel1_1_190175_fgenesh1_pm_32_25                 | superfamily | 215533 | 287  | 361  | 3.6E-05  | 47.1413 | cl33616 | PLN02983 | superfamily |

|                                       |             |        |     |      |          |         |         |                      |
|---------------------------------------|-------------|--------|-----|------|----------|---------|---------|----------------------|
| Aspcali1_664842_fgenes1_pm_125_27     | superfamily | 215641 | 843 | 1084 | 0.002866 | 41.7715 | cl33668 | PLN03237 superfamily |
| Aspchr1_498928_fgenes1_pm_5_27        | superfamily | 235175 | 819 | 901  | 0.001054 | 43.1288 | cl35229 | PRK03918 superfamily |
| Aspaur1at1_305250_MIX1778_78_46       | superfamily | 235540 | 309 | 343  | 0.000595 | 41.7716 | cl35354 | PRK05641 superfamily |
| Spoin1_38_transcript_OAA67843         | superfamily | 235540 | 421 | 454  | 0.006661 | 37.5344 | cl35354 | PRK05641 superfamily |
| Trihel1_251742_CE251741_17211         | superfamily | 235826 | 322 | 359  | 0.007592 | 36.7136 | cl35488 | PRK06549 superfamily |
| Tricet1_93302_CE93301_46071           | superfamily | 235826 | 321 | 360  | 0.004099 | 37.484  | cl35488 | PRK06549 superfamily |
| Asppal1_1_333678_fgenes1_pm_17_76     | superfamily | 235906 | 237 | 457  | 4.59E-06 | 49.4628 | cl35530 | PRK07003 superfamily |
| Aurp1ulNBB1_81351_gm1_4483_g          | superfamily | 236090 | 245 | 399  | 0.003859 | 40.3545 | cl35613 | PRK07764 superfamily |
| Triaspe1_201723_CE201722_14091        | superfamily | 236090 | 251 | 433  | 4.18E-05 | 46.5177 | cl35613 | PRK07764 superfamily |
| Triasper1_102949_CE102948_4880        | superfamily | 236090 | 251 | 433  | 6.65E-05 | 45.7473 | cl35613 | PRK07764 superfamily |
| Triasp1_467483_gm1_6887_g             | superfamily | 236090 | 251 | 433  | 6.65E-05 | 45.7473 | cl35613 | PRK07764 superfamily |
| Tricom1_312750_fgenes1_pm_18_11       | superfamily | 236090 | 251 | 421  | 0.002172 | 40.7397 | cl35613 | PRK07764 superfamily |
| Triag1_88576_CE88575_2814             | superfamily | 236090 | 251 | 422  | 0.005031 | 39.5841 | cl35613 | PRK07764 superfamily |
| Aspcl1_7285_7000001156880341          | superfamily | 236138 | 351 | 458  | 0.008774 | 39.0786 | cl35634 | PRK07994 superfamily |
| Toifu1_176308_CE176307_22727          | superfamily | 236138 | 394 | 507  | 0.000122 | 44.8566 | cl35634 | PRK07994 superfamily |
| Rhili1_41735_e_gw1_8_643_1            | superfamily | 236138 | 409 | 484  | 0.001376 | 41.775  | cl35634 | PRK07994 superfamily |
| Pennord1_6088_ma6087                  | superfamily | 236333 | 384 | 539  | 0.007742 | 38.9214 | cl35739 | PRK08691 superfamily |
| Asphethal1_273971_fgenes1_pm_4_107    | superfamily | 236669 | 290 | 454  | 0.007887 | 40.8387 | cl35903 | PRK10263 superfamily |
| Aspcam1_314862_gm1_1037_g             | superfamily | 236669 | 293 | 493  | 0.0045   | 40.0683 | cl35903 | PRK10263 superfamily |
| Aspell1_435257_gm1_10825_g            | superfamily | 236669 | 353 | 491  | 4.98E-05 | 46.6167 | cl35903 | PRK10263 superfamily |
| Aspbrev1_84337_CE84336_11112          | superfamily | 236669 | 255 | 487  | 0.001396 | 41.6091 | cl35903 | PRK10263 superfamily |
| Asppha1_36304_fgenes1_pm_90_11        | superfamily | 236669 | 272 | 400  | 0.008098 | 40.8387 | cl35903 | PRK10263 superfamily |
| Penswi1_403498_MIX14692_3843_79       | superfamily | 236669 | 297 | 453  | 0.008299 | 39.2979 | cl35903 | PRK10263 superfamily |
| Pencam1_13258_transcript_CRL31084     | superfamily | 236669 | 297 | 446  | 0.008148 | 39.2979 | cl35903 | PRK10263 superfamily |
| Aspfumis1_339395_fgenes1_pm_14_26     | superfamily | 236669 | 332 | 451  | 0.009531 | 38.9127 | cl35903 | PRK10263 superfamily |
| Pencit1_491645_gm1_10248_g            | superfamily | 236669 | 312 | 451  | 0.008299 | 39.2979 | cl35903 | PRK10263 superfamily |
| Penca1_200091_CE65481_7327            | superfamily | 236669 | 297 | 487  | 5.81E-05 | 46.2315 | cl35903 | PRK10263 superfamily |
| Penanta1_4282_CE4281_619              | superfamily | 236669 | 297 | 500  | 0.002971 | 40.8387 | cl35903 | PRK10263 superfamily |
| Penant1_4248_PENANT_c002G11587T0      | superfamily | 236669 | 297 | 500  | 0.002971 | 40.8387 | cl35903 | PRK10263 superfamily |
| Emmcr1_4936_transcript_PGH36816       | superfamily | 236669 | 259 | 408  | 0.003753 | 40.4535 | cl35903 | PRK10263 superfamily |
| Pendec1_3646_PENDEC_c025G01942T0      | superfamily | 236669 | 314 | 464  | 0.006997 | 39.2979 | cl35903 | PRK10263 superfamily |
| Monpu1_152560_CE152559_36224          | superfamily | 236669 | 344 | 500  | 0.006269 | 39.6831 | cl35903 | PRK10263 superfamily |
| Aspcost1_134003_CE134002_810          | superfamily | 236669 | 281 | 451  | 8.02E-05 | 45.8463 | cl35903 | PRK10263 superfamily |
| Hisca1_1811_HCAG_01708T0              | superfamily | 236669 | 347 | 465  | 0.000281 | 43.9203 | cl35903 | PRK10263 superfamily |
| Elagr1_3790_transcript_OXV07753       | superfamily | 236669 | 258 | 453  | 0.000509 | 43.1499 | cl35903 | PRK10263 superfamily |
| Asptep1_1_29620_fgenes1_pm_171_5      | superfamily | 236669 | 297 | 489  | 0.000181 | 46.2315 | cl35903 | PRK10263 superfamily |
| Umbpus1_106099_LPUS_04137T0           | superfamily | 236669 | 263 | 579  | 0.004182 | 40.4535 | cl35903 | PRK10263 superfamily |
| Uncre1_3463_URET_03609                | superfamily | 236669 | 267 | 397  | 0.000272 | 43.9203 | cl35903 | PRK10263 superfamily |
| Gymci1_1_148462_CE148461_16745        | superfamily | 236669 | 276 | 436  | 0.007401 | 39.2979 | cl35903 | PRK10263 superfamily |
| Aspven1_382610_fgenes1_pm_96_         | superfamily | 236669 | 226 | 427  | 0.001129 | 43.5351 | cl35903 | PRK10263 superfamily |
| Polfu1_142689_CE142688_2993           | superfamily | 236669 | 359 | 531  | 2.02E-06 | 51.2391 | cl35903 | PRK10263 superfamily |
| Lopma1_588457_e_gw1_10_199_1          | superfamily | 236669 | 245 | 464  | 3.27E-07 | 53.5503 | cl35903 | PRK10263 superfamily |
| Symko1_924027_fgenes1_pm_9_270        | superfamily | 236669 | 238 | 449  | 0.003839 | 40.4535 | cl35903 | PRK10263 superfamily |
| Xanpa2_1181751_CE1181750_31604        | superfamily | 236669 | 345 | 481  | 0.002503 | 41.2239 | cl35903 | PRK10263 superfamily |
| PseVKM4514_1_6686_transcript_KFY50790 | superfamily | 236669 | 269 | 442  | 0.00176  | 41.2239 | cl35903 | PRK10263 superfamily |
| Bysci1_235741_CE235740_10874          | superfamily | 236669 | 245 | 502  | 8.73E-06 | 48.9279 | cl35903 | PRK10263 superfamily |
| Rhiund1_813664_gm1_15810_g            | superfamily | 236669 | 342 | 511  | 4.48E-05 | 47.0019 | cl35903 | PRK10263 superfamily |
| Lopnu1_487714_e_gw1_7_506_1           | superfamily | 236669 | 237 | 509  | 9.52E-07 | 52.0095 | cl35903 | PRK10263 superfamily |
| Bimnz1_486664_e_gw1_91_226_1          | superfamily | 236669 | 275 | 441  | 1.27E-07 | 55.0911 | cl35903 | PRK10263 superfamily |
| Tirniv1_437511_CE437510_6177          | superfamily | 236669 | 373 | 505  | 0.0005   | 43.5351 | cl35903 | PRK10263 superfamily |
| Tercla1_1267604_gm1_3364_g            | superfamily | 236669 | 348 | 501  | 2.49E-05 | 47.7723 | cl35903 | PRK10263 superfamily |
| Aurpu_var_mel1_42819_e_gw1_4_795_1    | superfamily | 236669 | 244 | 415  | 0.001255 | 41.9943 | cl35903 | PRK10263 superfamily |
| Corca1_367650_CE367649_37241          | superfamily | 236669 | 284 | 516  | 9.2E-06  | 48.9279 | cl35903 | PRK10263 superfamily |
| Currey1_120598_CE120597_17889         | superfamily | 236669 | 312 | 540  | 6.83E-08 | 55.8615 | cl35903 | PRK10263 superfamily |
| Grascr1_1815_GST1_002658_RA           | superfamily | 236669 | 274 | 538  | 2.1E-05  | 47.7723 | cl35903 | PRK10263 superfamily |
| Darbet1_199659_CE199658_41150         | superfamily | 236669 | 235 | 512  | 1.74E-08 | 57.7875 | cl35903 | PRK10263 superfamily |
| Veren1_245083_CE245082_8299           | superfamily | 236669 | 262 | 543  | 4E-10    | 63.1803 | cl35903 | PRK10263 superfamily |
| Denna1_188722_CE188721_16666          | superfamily | 236669 | 251 | 498  | 5.04E-06 | 49.6983 | cl35903 | PRK10263 superfamily |
| Daral1_773998_e_gw1_5_394_1           | superfamily | 236669 | 229 | 512  | 4.05E-08 | 56.6319 | cl35903 | PRK10263 superfamily |
| Daralp1_661448_e_gw1_5_304_1          | superfamily | 236669 | 229 | 512  | 2.31E-08 | 57.4023 | cl35903 | PRK10263 superfamily |
| Phcap1_271027_CE271026_54591          | superfamily | 236669 | 357 | 518  | 3.79E-05 | 47.0019 | cl35903 | PRK10263 superfamily |
| Phcap1_117802_CE117801_56220          | superfamily | 236669 | 357 | 518  | 3.79E-05 | 47.0019 | cl35903 | PRK10263 superfamily |
| Pcapi1_510433_gm1_4462_g              | superfamily | 236669 | 357 | 518  | 3.79E-05 | 47.0019 | cl35903 | PRK10263 superfamily |
| Phycap1_250501_e_gw1_5_1033_1         | superfamily | 236669 | 357 | 518  | 3.79E-05 | 47.0019 | cl35903 | PRK10263 superfamily |
| Phycap1_2_433598_e_gw1_5_1393_1       | superfamily | 236669 | 357 | 518  | 3.79E-05 | 47.0019 | cl35903 | PRK10263 superfamily |
| Phcap1_200860_e_gw1_4_1020_1          | superfamily | 236669 | 357 | 518  | 3.79E-05 | 47.0019 | cl35903 | PRK10263 superfamily |
| Aqapat1_661758_fgenes1_pm_11_297      | superfamily | 236669 | 229 | 509  | 1.49E-05 | 48.1575 | cl35903 | PRK10263 superfamily |
| Lopnit1_1_412517_CE412516_5305        | superfamily | 236669 | 315 | 388  | 0.001355 | 41.6091 | cl35903 | PRK10263 superfamily |
| Ascim1_304059_fgenes1_pg_16_117       | superfamily | 236669 | 269 | 423  | 0.001454 | 41.6091 | cl35903 | PRK10263 superfamily |
| Amnli1_294988_CE294987_21643          | superfamily | 236669 | 272 | 515  | 4.36E-08 | 56.6319 | cl35903 | PRK10263 superfamily |
| Bulin1_803694_gm1_3868_g              | superfamily | 236669 | 286 | 470  | 0.000336 | 43.5351 | cl35903 | PRK10263 superfamily |
| Masph1_480044_e_gw1_1_1805_1          | superfamily | 236669 | 272 | 591  | 2.1E-05  | 47.7723 | cl35903 | PRK10263 superfamily |
| Microd1_451380_CE451379_26109         | superfamily | 236669 | 333 | 505  | 9.52E-07 | 52.0095 | cl35903 | PRK10263 superfamily |

|                                               |             |        |     |     |          |         |         |                      |
|-----------------------------------------------|-------------|--------|-----|-----|----------|---------|---------|----------------------|
| Claaq1_128268_FUN_002853_T1                   | superfamily | 236669 | 262 | 539 | 9.9E-11  | 65.1063 | cl35903 | PRK10263 superfamily |
| Lenf1_149818_CE149817_34677                   | superfamily | 236669 | 228 | 512 | 5.99E-09 | 59.3283 | cl35903 | PRK10263 superfamily |
| Cloaq1_588537_fgenes1_pg_71_51                | superfamily | 236669 | 234 | 547 | 7.94E-05 | 45.8463 | cl35903 | PRK10263 superfamily |
| Herpot1_1_42070_CE42069_24086                 | superfamily | 236669 | 260 | 468 | 4.16E-09 | 59.7135 | cl35903 | PRK10263 superfamily |
| Clagr3_7751_CLAGR_007674_RA                   | superfamily | 236669 | 338 | 458 | 0.003874 | 40.4535 | cl35903 | PRK10263 superfamily |
| Parsp1_222445_CE222444_3318                   | superfamily | 236669 | 286 | 514 | 1.35E-07 | 54.7059 | cl35903 | PRK10263 superfamily |
| Cenge3_688999_fgenes1_pm_40_58                | superfamily | 236669 | 236 | 397 | 0.000132 | 45.0759 | cl35903 | PRK10263 superfamily |
| Cenge3_688999_fgenes1_pm_40_58                | superfamily | 236669 | 339 | 497 | 0.001279 | 41.9943 | cl35903 | PRK10263 superfamily |
| Pse03VT05_1_9849_transcript_OBT81446          | superfamily | 236669 | 252 | 522 | 4.04E-05 | 46.6167 | cl35903 | PRK10263 superfamily |
| Melpu1_235860_e_gw1_73_46_1                   | superfamily | 236669 | 229 | 511 | 1.12E-08 | 58.5579 | cl35903 | PRK10263 superfamily |
| Plesi1_375738_e_gw1_5_1386_1                  | superfamily | 236669 | 229 | 509 | 8.73E-10 | 62.0247 | cl35903 | PRK10263 superfamily |
| Maseb1_507332_estExt_fgenes1_pg_C_90212       | superfamily | 236669 | 471 | 806 | 5.32E-09 | 60.0987 | cl35903 | PRK10263 superfamily |
| Acrvag1_13361_CE13360_14207                   | superfamily | 236669 | 312 | 601 | 2.34E-05 | 47.7723 | cl35903 | PRK10263 superfamily |
| Lorma1_549405_gm1_9427_g                      | superfamily | 236669 | 253 | 546 | 0.000373 | 43.5351 | cl35903 | PRK10263 superfamily |
| Greabi1_413335_fgenes1_pg_22_151              | superfamily | 236669 | 733 | 871 | 4.54E-05 | 47.3871 | cl35903 | PRK10263 superfamily |
| Karrh1_35677_CE35676_6966                     | superfamily | 236669 | 285 | 513 | 8.13E-06 | 48.9279 | cl35903 | PRK10263 superfamily |
| Altso1_122073_ASCTG_875_jigsaw_mRNA_3         | superfamily | 236669 | 469 | 807 | 9.59E-05 | 47.0019 | cl35903 | PRK10263 superfamily |
| Altom1_120644_ATMCTG_3360_jigsaw_mRNA_2       | superfamily | 236669 | 424 | 772 | 8.7E-05  | 47.0019 | cl35903 | PRK10263 superfamily |
| Altcar1_110133_ACMCTG_2300_jigsaw_mRNA_2      | superfamily | 236669 | 385 | 731 | 0.000439 | 44.6907 | cl35903 | PRK10263 superfamily |
| Lorju1_391698_gw1_21_45_1                     | superfamily | 236669 | 269 | 478 | 0.002405 | 40.4535 | cl35903 | PRK10263 superfamily |
| Boeex1_103679_CE103678_4355                   | superfamily | 236669 | 371 | 523 | 0.000819 | 42.3795 | cl35903 | PRK10263 superfamily |
| Glost2_401370_fgenes1_pm_NODE7478_7           | superfamily | 236669 | 236 | 393 | 8.37E-05 | 45.8463 | cl35903 | PRK10263 superfamily |
| Phomu1_263058_CE263057_3388                   | superfamily | 236669 | 367 | 492 | 0.000528 | 43.1499 | cl35903 | PRK10263 superfamily |
| ConPMI546_671717_CE671716_31551               | superfamily | 236669 | 303 | 526 | 1.99E-05 | 47.7723 | cl35903 | PRK10263 superfamily |
| Pseudest1_3676_VC83_00890T0                   | superfamily | 236669 | 272 | 438 | 0.005448 | 39.2979 | cl35903 | PRK10263 superfamily |
| Epini1_331387_e_gw1_10_693_1                  | superfamily | 236669 | 270 | 425 | 2.94E-06 | 50.4687 | cl35903 | PRK10263 superfamily |
| Leppa1_297828_e_gw1_159_18_1                  | superfamily | 236669 | 300 | 487 | 4.19E-05 | 46.6167 | cl35903 | PRK10263 superfamily |
| Pyrsp1_607587_fgenes1_pm_2_22                 | superfamily | 236669 | 230 | 489 | 7.75E-09 | 58.5579 | cl35903 | PRK10263 superfamily |
| Altte1_119648_AT2CTG_637_jigsaw_mRNA_171      | superfamily | 236669 | 279 | 599 | 1.87E-06 | 51.2391 | cl35903 | PRK10263 superfamily |
| Altal1_251246_CE251245_83928                  | superfamily | 236669 | 280 | 600 | 1.83E-06 | 51.2391 | cl35903 | PRK10263 superfamily |
| Altar1_113069_AABCTG_2978_jigsaw_mRNA_1       | superfamily | 236669 | 318 | 638 | 1.82E-06 | 51.2391 | cl35903 | PRK10263 superfamily |
| Altfr1_243159_AFGCTG_701_jigsaw_mRNA_1        | superfamily | 236669 | 279 | 599 | 1.42E-06 | 51.6243 | cl35903 | PRK10263 superfamily |
| Altlo1_257016_ALGCTG_2604_jigsaw_mRNA_59      | superfamily | 236669 | 327 | 449 | 4.47E-05 | 46.6167 | cl35903 | PRK10263 superfamily |
| Alalt1_112159_ATNCTG_56_jigsaw_mRNA_172       | superfamily | 236669 | 386 | 706 | 1.18E-06 | 52.0095 | cl35903 | PRK10263 superfamily |
| Alalte1_110008_AATCTG_420_jigsaw_mRNA_70      | superfamily | 236669 | 299 | 619 | 2.12E-06 | 50.8539 | cl35903 | PRK10263 superfamily |
| Aalte1_112641_AA2CTG_134_jigsaw_mRNA_167      | superfamily | 236669 | 279 | 599 | 1.58E-06 | 51.2391 | cl35903 | PRK10263 superfamily |
| Altalt1_227087_CE227086_18892                 | superfamily | 236669 | 280 | 600 | 3.08E-06 | 50.4687 | cl35903 | PRK10263 superfamily |
| Color110_1_162177_estExt_fgenes1_pg_C_1230004 | superfamily | 236669 | 346 | 522 | 7.44E-05 | 45.8463 | cl35903 | PRK10263 superfamily |
| DelFL0756_1_194243_CE194242_34694             | superfamily | 236669 | 264 | 398 | 3.1E-05  | 47.3871 | cl35903 | PRK10263 superfamily |
| Altli1_251267_ATKCTG_2192_jigsaw_mRNA_5       | superfamily | 236669 | 279 | 599 | 3.37E-06 | 50.4687 | cl35903 | PRK10263 superfamily |
| Sceap1_4492_transcript_KEZ46129               | superfamily | 236669 | 252 | 441 | 0.000456 | 43.1499 | cl35903 | PRK10263 superfamily |
| Phycitr1_620275_fgenes1_pm_54_11              | superfamily | 236669 | 353 | 501 | 0.001922 | 41.2239 | cl35903 | PRK10263 superfamily |
| Phycpc1_483960_fgenes1_pm_31_63               | superfamily | 236669 | 353 | 501 | 0.001922 | 41.2239 | cl35903 | PRK10263 superfamily |
| Parch1_38214_CE38213_17049                    | superfamily | 236669 | 286 | 590 | 7.83E-08 | 55.4763 | cl35903 | PRK10263 superfamily |
| Parchr1_438799_e_gw1_6_933_1                  | superfamily | 236669 | 286 | 590 | 1.43E-07 | 54.7059 | cl35903 | PRK10263 superfamily |
| Calful1_768127_fgenes1_pg_70_22               | superfamily | 236669 | 389 | 540 | 5.7E-05  | 46.6167 | cl35903 | PRK10263 superfamily |
| Spofi1_481125_gm1_8175_g                      | superfamily | 236669 | 234 | 422 | 4.22E-05 | 46.6167 | cl35903 | PRK10263 superfamily |
| Spofi1_481125_gm1_8175_g                      | superfamily | 236669 | 371 | 515 | 0.000657 | 42.7647 | cl35903 | PRK10263 superfamily |
| Pyrtr1_149332_PTRT_03646                      | superfamily | 236669 | 289 | 530 | 0.0006   | 43.1499 | cl35903 | PRK10263 superfamily |
| Pcit120373_276358_e_gw1_37_80_1               | superfamily | 236669 | 363 | 518 | 6.32E-05 | 46.2315 | cl35903 | PRK10263 superfamily |
| Pcit11120_567181_e_gw1_45_88_1                | superfamily | 236669 | 363 | 518 | 6.81E-05 | 45.8463 | cl35903 | PRK10263 superfamily |
| Pcit122670_533140_e_gw1_45_32_1               | superfamily | 236669 | 363 | 518 | 6.64E-05 | 46.2315 | cl35903 | PRK10263 superfamily |
| Pcit131864_796156_e_gw1_46_14_1               | superfamily | 236669 | 363 | 518 | 6.64E-05 | 46.2315 | cl35903 | PRK10263 superfamily |
| Pcit141352_550346_e_gw1_72_8_1                | superfamily | 236669 | 363 | 518 | 6.64E-05 | 46.2315 | cl35903 | PRK10263 superfamily |
| Phy27169_388894_fgenes1_pm_79_9               | superfamily | 236669 | 360 | 508 | 0.001793 | 41.6091 | cl35903 | PRK10263 superfamily |
| Phypa1_507687_e_gw1_32_21_1                   | superfamily | 236669 | 363 | 518 | 6.64E-05 | 46.2315 | cl35903 | PRK10263 superfamily |
| Phycit1_213906_CE213905_38770                 | superfamily | 236669 | 362 | 519 | 0.000777 | 42.7647 | cl35903 | PRK10263 superfamily |
| Pcitr12_232290_CE232289_12775                 | superfamily | 236669 | 362 | 519 | 0.000777 | 42.7647 | cl35903 | PRK10263 superfamily |
| Cocsa1_258482_CE53923_12395                   | superfamily | 236669 | 227 | 525 | 6.31E-05 | 46.2315 | cl35903 | PRK10263 superfamily |
| Chalo1_235725_CE235724_44958                  | superfamily | 236669 | 350 | 469 | 0.001197 | 41.6091 | cl35903 | PRK10263 superfamily |
| Paront1_36026_e_gw1_44_129_1                  | superfamily | 236669 | 300 | 494 | 1.01E-06 | 52.0095 | cl35903 | PRK10263 superfamily |
| Lepmi1_353822_e_gw1_9_827_1                   | superfamily | 236669 | 275 | 455 | 7.24E-06 | 49.3131 | cl35903 | PRK10263 superfamily |
| Stasp1_126978_CE126977_15020                  | superfamily | 236669 | 277 | 590 | 4.74E-06 | 49.6983 | cl35903 | PRK10263 superfamily |
| Setho1_78401_e_gw1_137_63_1                   | superfamily | 236669 | 256 | 587 | 8.26E-06 | 48.9279 | cl35903 | PRK10263 superfamily |
| Decga1_204733_CE204732_18188                  | superfamily | 236669 | 310 | 523 | 1.64E-07 | 54.7059 | cl35903 | PRK10263 superfamily |
| Phapo1_602669_e_gw1_2_798_1                   | superfamily | 236669 | 274 | 596 | 0.000288 | 43.9203 | cl35903 | PRK10263 superfamily |
| Altro1_194625_CE194624_13192                  | superfamily | 236669 | 311 | 488 | 5.19E-05 | 46.6167 | cl35903 | PRK10263 superfamily |

|                                           |             |        |      |      |          |         |         |                      |
|-------------------------------------------|-------------|--------|------|------|----------|---------|---------|----------------------|
| Sorbr1_252747_CE252746_15970              | superfamily | 236669 | 252  | 459  | 7.22E-05 | 45.8463 | cl35903 | PRK10263 superfamily |
| Magor1_7389_rna_MGG_08556T0               | superfamily | 236669 | 348  | 559  | 0.00054  | 43.1499 | cl35903 | PRK10263 superfamily |
| CopCBS38678_1_337827_e_gw1_134_23_1       | superfamily | 236669 | 292  | 439  | 0.009904 | 38.9127 | cl35903 | PRK10263 superfamily |
| Sorhu1_37672_CE37671_3344                 | superfamily | 236669 | 297  | 423  | 0.003203 | 40.4535 | cl35903 | PRK10263 superfamily |
| Sorma1_5067_transcript_CCC07417           | superfamily | 236669 | 297  | 423  | 0.003203 | 40.4535 | cl35903 | PRK10263 superfamily |
| Conioc1_1210519_gm1_1167_g                | superfamily | 236669 | 374  | 521  | 0.001871 | 41.2239 | cl35903 | PRK10263 superfamily |
| Conioc1_1211268_gm1_1916_g                | superfamily | 236669 | 366  | 458  | 0.000681 | 42.7647 | cl35903 | PRK10263 superfamily |
| Mabrmo1_2765_g3750_t1                     | superfamily | 236669 | 349  | 533  | 0.008161 | 39.2979 | cl35903 | PRK10263 superfamily |
| Myrdu1_318633_estExt_Genemark1_C_2_t10445 | superfamily | 236669 | 307  | 448  | 0.000364 | 43.5351 | cl35903 | PRK10263 superfamily |
| Scibo1_3923_transcript_ESZ95703           | superfamily | 236669 | 334  | 553  | 0.008175 | 39.2979 | cl35903 | PRK10263 superfamily |
| Delst1_367146_fgenes1_pg_3_413            | superfamily | 236669 | 286  | 382  | 0.0002   | 44.3055 | cl35903 | PRK10263 superfamily |
| Lophiu1_245295_CE245294_33806             | superfamily | 236669 | 230  | 425  | 2.15E-06 | 50.8539 | cl35903 | PRK10263 superfamily |
| Scisan1_154033_CE154032_4218              | superfamily | 236669 | 253  | 459  | 2.9E-07  | 53.5503 | cl35903 | PRK10263 superfamily |
| Neobo1_511409_e_gw1_19_91_1               | superfamily | 236669 | 321  | 453  | 0.003774 | 40.0683 | cl35903 | PRK10263 superfamily |
| Trieva1_107016_CE107015_46155             | superfamily | 236669 | 321  | 470  | 0.000128 | 45.0759 | cl35903 | PRK10263 superfamily |
| Stobe1_85660_fgenes1_pm_7_83              | superfamily | 236669 | 287  | 486  | 7.37E-07 | 52.3947 | cl35903 | PRK10263 superfamily |
| Altsp012_1_265874_CE265873_14578          | superfamily | 236669 | 329  | 481  | 0.003593 | 40.4535 | cl35903 | PRK10263 superfamily |
| Altsp017_1_254432_CE254431_8397           | superfamily | 236669 | 292  | 596  | 0.007165 | 39.2979 | cl35903 | PRK10263 superfamily |
| Phimu1_351158_CE351157_50339              | superfamily | 236669 | 299  | 451  | 2.84E-05 | 47.0019 | cl35903 | PRK10263 superfamily |
| Cryan3_116812_CE116811_9156               | superfamily | 236669 | 307  | 525  | 0.001044 | 42.3795 | cl35903 | PRK10263 superfamily |
| Cadosp1_455305_e_gw1_11_139_1             | superfamily | 236669 | 275  | 495  | 0.00016  | 44.6907 | cl35903 | PRK10263 superfamily |
| Theglo1_144858_CE144857_41804             | superfamily | 236669 | 266  | 441  | 0.001849 | 41.2239 | cl35903 | PRK10263 superfamily |
| AcreTS7_1_508495_CE508494_14679           | superfamily | 236669 | 243  | 407  | 1.87E-06 | 50.4687 | cl35903 | PRK10263 superfamily |
| Marbr1_2001_MBM_05547                     | superfamily | 236669 | 175  | 321  | 0.001367 | 43.9203 | cl35903 | PRK10263 superfamily |
| Tribre1_123693_g10222_t1                  | superfamily | 236669 | 248  | 455  | 9.53E-05 | 45.4611 | cl35903 | PRK10263 superfamily |
| Tribrev1_416765_fgenes1_pm_20_122         | superfamily | 236669 | 248  | 455  | 9.53E-05 | 45.4611 | cl35903 | PRK10263 superfamily |
| Triaru1_5241_rna5936                      | superfamily | 236669 | 248  | 455  | 0.000172 | 44.6907 | cl35903 | PRK10263 superfamily |
| Cryan3_349102_CE349101_9152               | superfamily | 236669 | 306  | 524  | 0.001026 | 42.3795 | cl35903 | PRK10263 superfamily |
| Racan1_11240_transcript_OQN99911          | superfamily | 236669 | 288  | 580  | 0.002199 | 41.2239 | cl35903 | PRK10263 superfamily |
| Cryo1_476118_gm1_7604_g                   | superfamily | 236669 | 381  | 516  | 0.001435 | 41.6091 | cl35903 | PRK10263 superfamily |
| Alikh1_653463_e_gw1_417_42_1              | superfamily | 236669 | 160  | 287  | 3.43E-05 | 46.6167 | cl35903 | PRK10263 superfamily |
| Aspaulat1_305250_MIX1778_78_46            | superfamily | 236768 | 1081 | 1189 | 0.000465 | 43.5177 | cl35954 | PRK10819 superfamily |
| Aspamoe1_219996_gm1_1720_g                | superfamily | 237057 | 294  | 500  | 0.006338 | 41.0147 | cl36108 | PRK12323 superfamily |
| Aspve1_78996_gm1_1464_g                   | superfamily | 237057 | 294  | 500  | 0.006744 | 40.6295 | cl36108 | PRK12323 superfamily |
| Aspaus1_957779_fgenes1_pm_11_72           | superfamily | 237057 | 294  | 500  | 0.006836 | 40.6295 | cl36108 | PRK12323 superfamily |
| Aspind1_464315_MIX2028_2160_32            | superfamily | 237057 | 264  | 441  | 0.00254  | 40.6295 | cl36108 | PRK12323 superfamily |
| Xylhe1_240511_fgenes1_pg_9_209            | superfamily | 237057 | 289  | 453  | 1.37E-06 | 51.4151 | cl36108 | PRK12323 superfamily |
| FvantT33_1_317272_fgenes1_pm_27_27        | superfamily | 237057 | 254  | 456  | 1.17E-05 | 47.9483 | cl36108 | PRK12323 superfamily |
| FvantT36_1_30538_CE30537_38119            | superfamily | 237057 | 254  | 456  | 1.18E-05 | 47.9483 | cl36108 | PRK12323 superfamily |
| FvantT77_1_366473_gm1_12667_g             | superfamily | 237057 | 254  | 456  | 1.18E-05 | 47.9483 | cl36108 | PRK12323 superfamily |
| FvantT78_1_303387_MIX14106_991388         | superfamily | 237057 | 254  | 456  | 1.18E-05 | 47.9483 | cl36108 | PRK12323 superfamily |
| FvantT95_1_282311_fgenes1_pm_6_241        | superfamily | 237057 | 254  | 456  | 1.18E-05 | 47.9483 | cl36108 | PRK12323 superfamily |
| FusspF11_1_913638_gm1_374_g               | superfamily | 237057 | 254  | 456  | 1.18E-05 | 47.9483 | cl36108 | PRK12323 superfamily |
| FvantT110_1_335862_CE335861_85793         | superfamily | 237057 | 254  | 456  | 1.18E-05 | 47.9483 | cl36108 | PRK12323 superfamily |
| FvantT126_1_444349_gm1_5114_g             | superfamily | 237057 | 254  | 456  | 1.18E-05 | 47.9483 | cl36108 | PRK12323 superfamily |
| FvantT159_1_478216_gm1_230_g              | superfamily | 237057 | 254  | 456  | 1.18E-05 | 47.9483 | cl36108 | PRK12323 superfamily |
| Fusva1_581107_MIX5788_21615_91            | superfamily | 237057 | 254  | 456  | 1.17E-05 | 47.9483 | cl36108 | PRK12323 superfamily |
| Fusvan1_249026_CE249025_59849             | superfamily | 237057 | 254  | 456  | 1.18E-05 | 47.9483 | cl36108 | PRK12323 superfamily |
| FvantT200_1_50449_CE50448_11327           | superfamily | 237057 | 254  | 456  | 1.17E-05 | 47.9483 | cl36108 | PRK12323 superfamily |
| FvantT219_1_339734_gm1_7692_g             | superfamily | 237057 | 254  | 456  | 1.17E-05 | 47.9483 | cl36108 | PRK12323 superfamily |
| FvantT23_1_390999_fgenes1_pm_49_66        | superfamily | 237057 | 254  | 427  | 2E-05    | 47.1779 | cl36108 | PRK12323 superfamily |
| FvantT299_1_346769_fgenes1_pg_11_518      | superfamily | 237057 | 254  | 456  | 1.17E-05 | 47.9483 | cl36108 | PRK12323 superfamily |
| FvantT31_1_2669_CE2668_10684              | superfamily | 237057 | 254  | 456  | 1.18E-05 | 47.9483 | cl36108 | PRK12323 superfamily |
| Tristr1_341931_gm1_7708_g                 | superfamily | 237057 | 225  | 444  | 1.28E-05 | 47.9483 | cl36108 | PRK12323 superfamily |
| Triint1_304420_CE304419_25048             | superfamily | 237057 | 225  | 465  | 5.42E-06 | 49.1039 | cl36108 | PRK12323 superfamily |
| Triact1_161752_CE161751_14399             | superfamily | 237057 | 310  | 502  | 3.52E-05 | 46.7927 | cl36108 | PRK12323 superfamily |
| TriviGv29_8_2_164251_e_gw1_91_653_1       | superfamily | 237057 | 331  | 464  | 1.71E-06 | 50.6447 | cl36108 | PRK12323 superfamily |
| Triifa1_309717_CE309716_18569             | superfamily | 237057 | 325  | 481  | 0.000136 | 44.8667 | cl36108 | PRK12323 superfamily |
| Triam1_347408_CE347407_16788              | superfamily | 237057 | 315  | 482  | 0.000429 | 43.3259 | cl36108 | PRK12323 superfamily |
| Tripleu1_63953_CE63952_18853              | superfamily | 237057 | 315  | 482  | 0.000429 | 43.3259 | cl36108 | PRK12323 superfamily |
| Tri5640_1_102838_CE102837_9337            | superfamily | 237057 | 320  | 475  | 0.000112 | 44.8667 | cl36108 | PRK12323 superfamily |
| Trich5757_1_289516_CE289515_10885         | superfamily | 237057 | 313  | 481  | 0.00376  | 40.2443 | cl36108 | PRK12323 superfamily |
| Triafa1_64506_CE64505_13312               | superfamily | 237057 | 313  | 481  | 0.001958 | 41.0147 | cl36108 | PRK12323 superfamily |
| Dacma1_450764_CE450763_40139              | superfamily | 237057 | 305  | 450  | 0.008061 | 38.7035 | cl36108 | PRK12323 superfamily |
| Trialm1_333503_fgenes1_pm_7_126           | superfamily | 237057 | 320  | 476  | 0.00028  | 43.7111 | cl36108 | PRK12323 superfamily |
| Asptri1_201493_fgenes1_pm_666_1           | superfamily | 183854 | 953  | 1023 | 0.001    | 42.6977 | cl32851 | PRK13042 superfamily |
| Aspund1_1_278765_fgenes1_pm_1321          | superfamily | 139494 | 1086 | 1186 | 0.000152 | 45.5022 | cl31400 | PRK13335 superfamily |
| Porpun1_592424_MIX1098_29595_36           | superfamily | 184281 | 328  | 419  | 0.000207 | 43.6583 | cl42933 | PRK13729 superfamily |
| Aspaura1_203970_gm1_7400_g                | superfamily | 237864 | 1079 | 1214 | 0.005747 | 40.9484 | cl36446 | PRK14950 superfamily |
| Penac1_441878_fgenes1_pm_2_446            | superfamily | 237864 | 366  | 457  | 0.005448 | 39.4076 | cl36446 | PRK14950 superfamily |
| Claps1_1788_A1O5_07176T0                  | superfamily | 237864 | 562  | 645  | 0.000158 | 45.1856 | cl36446 | PRK14950 superfamily |
| Talma1_2_3120_PMAA_068430                 | superfamily | 237874 | 373  | 469  | 0.000195 | 44.3811 | cl36455 | PRK14971 superfamily |

|                                     |             |        |      |      |          |         |           |                                 |
|-------------------------------------|-------------|--------|------|------|----------|---------|-----------|---------------------------------|
| Aspnov1_431072_fgenes1_pg_4_553     | superfamily | 237874 | 302  | 411  | 0.006124 | 39.3735 | cl36455   | PRK14971 superfamily            |
| Plemel1_105900_CE105899_14980       | superfamily | 237874 | 512  | 586  | 0.000462 | 43.2255 | cl36455   | PRK14971 superfamily            |
| Aspbre1_59200_CE59199_1577          | superfamily | 185594 | 332  | 534  | 0.001018 | 41.9843 | cl33180   | PTZ00395 superfamily            |
| Tryvit1_440647_e_gw1_6_229_1        | superfamily | 185594 | 253  | 451  | 0.001306 | 41.9843 | cl33180   | PTZ00395 superfamily            |
| Rhyag1_13472_transcript_CZT07453    | superfamily | 185594 | 248  | 478  | 2.21E-05 | 47.3771 | cl33180   | PTZ00395 superfamily            |
| Zasce1_69855_fgenes1_pm_42_24       | superfamily | 185594 | 344  | 494  | 0.003173 | 40.4436 | cl33180   | PTZ00395 superfamily            |
| Rhyco1_8923_transcript_CZT09395     | superfamily | 185594 | 248  | 452  | 0.0001   | 45.4511 | cl33180   | PTZ00395 superfamily            |
| Rhyse1_7053_transcript_CZT48850     | superfamily | 185594 | 248  | 478  | 3.22E-06 | 50.0735 | cl33180   | PTZ00395 superfamily            |
| Verga1_121575_PV09_08469T0          | superfamily | 185594 | 214  | 447  | 0.005407 | 39.6732 | cl33180   | PTZ00395 superfamily            |
| Hymvar1_278074_CE278073_24053       | superfamily | 185594 | 412  | 577  | 0.005162 | 40.0584 | cl33180   | PTZ00395 superfamily            |
| Plecto1_55328_CE55327_24102         | superfamily | 185594 | 266  | 382  | 0.000794 | 42.3695 | cl33180   | PTZ00395 superfamily            |
| Plecuc1_325164_gm1_2614_g           | superfamily | 185594 | 312  | 390  | 0.00017  | 44.6807 | cl33180   | PTZ00395 superfamily            |
| Astsub1_153682_CE153681_27034       | superfamily | 185594 | 276  | 429  | 0.003956 | 40.0584 | cl33180   | PTZ00395 superfamily            |
| Xylhel2_504945_fgenes1_pm_14_60     | superfamily | 185594 | 297  | 470  | 5.31E-06 | 49.3031 | cl33180   | PTZ00395 superfamily            |
| Podjug1_571548_gm1_3394_g           | superfamily | 185594 | 236  | 360  | 0.001786 | 40.8288 | cl33180   | PTZ00395 superfamily            |
| Nemsp1_23131_fgenes1_pg_8_80        | superfamily | 185594 | 241  | 400  | 0.004748 | 39.6732 | cl33180   | PTZ00395 superfamily            |
| Asphey1_11489_fgenes1_pg_1_159      | superfamily | 185628 | 985  | 1268 | 0.000201 | 45.8362 | cl33186   | PTZ00449 superfamily            |
| Asphor1_149261_fgenes1_pm_8_33      | superfamily | 185628 | 1017 | 1228 | 0.000128 | 46.2214 | cl33186   | PTZ00449 superfamily            |
| Aspala1_143485_fgenes1_pm_6_241     | superfamily | 185628 | 1029 | 1240 | 6.58E-05 | 47.377  | cl33186   | PTZ00449 superfamily            |
| Asppseute1_423105_e_gw1_195_254_1   | superfamily | 185628 | 1033 | 1244 | 0.000135 | 46.2214 | cl33186   | PTZ00449 superfamily            |
| Lizem1_101759_e_gw1_5_1050_1        | superfamily | 185628 | 381  | 565  | 0.000928 | 42.3694 | cl33186   | PTZ00449 superfamily            |
| Verped1_331869_e_gw1_27_134_1       | superfamily | 185628 | 352  | 488  | 0.000734 | 42.3694 | cl33186   | PTZ00449 superfamily            |
| Color1_5452_CORC01_13689T0          | superfamily | 185628 | 332  | 406  | 0.00338  | 40.4434 | cl33186   | PTZ00449 superfamily            |
| Colto1_5511_CT0861_01833T0          | superfamily | 185628 | 327  | 501  | 7.73E-05 | 45.451  | cl33186   | PTZ00449 superfamily            |
| Colce1_776991_gm1_989_g             | superfamily | 185628 | 322  | 476  | 0.000957 | 41.9842 | cl33186   | PTZ00449 superfamily            |
| Colsu1_492272_CE492271_15446        | superfamily | 185628 | 321  | 529  | 0.000298 | 43.525  | cl33186   | PTZ00449 superfamily            |
| Colsub1_7642_transcript_KDN70510    | superfamily | 185628 | 321  | 529  | 0.000298 | 43.525  | cl33186   | PTZ00449 superfamily            |
| Coler1_524697_e_gw1_14_145_1        | superfamily | 185628 | 321  | 529  | 0.000507 | 43.1398 | cl33186   | PTZ00449 superfamily            |
| Acchr1_5707_ACRE_045050T0           | superfamily | 185628 | 317  | 487  | 0.004748 | 39.673  | cl33186   | PTZ00449 superfamily            |
| Colhig2_13941_CH63R_12733T0         | superfamily | 185628 | 323  | 509  | 2.64E-05 | 46.9918 | cl33186   | PTZ00449 superfamily            |
| Triver1_2238_FLIJena_TRV_00043      | superfamily | 273167 | 466  | 526  | 0.006608 | 39.1079 | cl36702   | rad23 superfamily               |
| Aspspe1_1_182093_fgenes1_pm_2_66    | superfamily | 236766 | 1068 | 1226 | 0.005677 | 41.1785 | cl35953   | rme superfamily                 |
| Aspegy1_533726_fgenes1_pm_73_2      | superfamily | 445260 | 916  | 985  | 0.001502 | 38.7666 | cl01090   | SlyX superfamily                |
| Aspins1_294536_fgenes1_pm_13_1_5    | superfamily | 274009 | 749  | 976  | 0.000398 | 44.6735 | cl37070   | SMC_prok_A superfamily          |
| Aspth1_360369_fgenes1_pm_21_90      | superfamily | 274009 | 762  | 989  | 0.001882 | 42.7475 | cl37070   | SMC_prok_A superfamily          |
| Asphethal1_273971_fgenes1_pm_4_107  | superfamily | 274009 | 791  | 1026 | 0.000425 | 44.6735 | cl37070   | SMC_prok_A superfamily          |
| XylFL0016_426616_MIX4792_21201_86   | superfamily | 434592 | 251  | 412  | 0.000515 | 42.1003 | cl25880   | SOBP superfamily                |
| PhaeoFL0889_1_310332_CE310331_40217 | superfamily | 425992 | 332  | 401  | 0.001028 | 41.4814 | cl03073   | TYA superfamily                 |
| Phisc1_1899_CE1898_951              | superfamily | 452900 | 600  | 671  | 2.49E-11 | 59.497  | cl28922   | Ubl1_cv_Nsp3_N-like superfamily |
| Chove1_1787637_fgenes1_pg_17_1_40   | superfamily | 113583 | 383  | 463  | 0.004258 | 39.4965 | cl04774   | Umbravirus_LDM superfamily      |
| Tubae1_7625_GSTUAT00000625001       | superfamily | 113583 | 384  | 464  | 0.006831 | 38.7261 | cl04774   | Umbravirus_LDM superfamily      |
| Tubmes1_3624216_fgenes1_pg_75_49    | superfamily | 113583 | 384  | 464  | 0.007681 | 38.7261 | cl04774   | Umbravirus_LDM superfamily      |
| Aspegy1_533726_fgenes1_pm_73_2      | superfamily | 432760 | 584  | 717  | 0.004969 | 40.7772 | cl15068   | Vac7 superfamily                |
| Phisc1_1899_CE1898_951              | specific    | 395120 | 503  | 537  | 7.07E-11 | 57.3077 | pfam00172 | Zn clus                         |
| PeZ-VelB                            |             |        |      |      |          |         |           |                                 |
| OphPMI507_1_406450_fgenes1_pm_6_306 | superfamily | 397207 | 1    | 52   | 5.4E-05  | 43.5043 | cl37681   | Amelogenin superfamily          |
| Matter1_275085_CE275084_8590        | superfamily | 427171 | 3    | 59   | 0.001186 | 40.9054 | cl38111   | Atrophin-1 superfamily          |
| Tirniv1_28098_CE28097_13283         | superfamily | 427171 | 7    | 70   | 0.002452 | 39.7498 | cl38111   | Atrophin-1 superfamily          |
| Annnit1_350601_CE350600_16102       | superfamily | 227547 | 4    | 56   | 0.005047 | 38.9596 | cl34947   | COG5222 superfamily             |
| AnFL0455_28318_CE28317_52013        | superfamily | 227547 | 4    | 56   | 0.007501 | 38.5744 | cl34947   | COG5222 superfamily             |
| Antru1_164755_CE164754_11841        | superfamily | 227547 | 4    | 56   | 0.007344 | 38.5744 | cl34947   | COG5222 superfamily             |
| HyFL0890_1_164840_CE164839_152_42   | superfamily | 227547 | 4    | 56   | 0.006947 | 38.5744 | cl34947   | COG5222 superfamily             |
| HyNC0597_1_547653_CE547652_53_993   | superfamily | 227547 | 4    | 56   | 0.00728  | 38.5744 | cl34947   | COG5222 superfamily             |
| HyFL0543_1_208292_CE208291_972_7    | superfamily | 227547 | 4    | 56   | 0.007194 | 38.5744 | cl34947   | COG5222 superfamily             |
| Venin1_14690_atg2237_t1             | superfamily | 227637 | 7    | 605  | 6.6E-136 | 434.51  | cl34984   | COG5329 superfamily             |
| Pseel1_9490_g9136_t1                | superfamily | 451501 | 24   | 258  | 6.49E-49 | 173.304 | cl23717   | crotonase-like superfamily      |
| Rutfi1_622838_fgenes1_pg_6_218      | superfamily | 455861 | 6    | 131  | 0.003286 | 39.8088 | cl42516   | dnaA superfamily                |
| Aspber1_106503_CE106502_457         | superfamily | 455861 | 147  | 215  | 0.006115 | 38.6532 | cl42516   | dnaA superfamily                |
| Hypinv1_686988_gm4_6360_g           | superfamily | 455861 | 2    | 112  | 0.004097 | 39.4236 | cl42516   | dnaA superfamily                |
| HyFL1284_2_348230_CE348229_333_62   | superfamily | 455861 | 3    | 114  | 0.000419 | 42.5052 | cl42516   | dnaA superfamily                |
| HyFL1857_1_139956_CE139955_633_1    | superfamily | 455861 | 2    | 112  | 0.001376 | 40.9644 | cl42516   | dnaA superfamily                |
| Hypcer1_156440_CE156439_6657        | superfamily | 455861 | 2    | 114  | 8.54E-05 | 44.8164 | cl42516   | dnaA superfamily                |
| DimP5P66_572132_e_gw1_25_348_1      | superfamily | 455861 | 213  | 334  | 0.000761 | 42.12   | cl42516   | dnaA superfamily                |
| HypEC38_3_246525_CE246524_216_98    | superfamily | 455861 | 2    | 112  | 0.004097 | 39.4236 | cl42516   | dnaA superfamily                |
| Hypfra2_526887_MIX214_49028_81      | superfamily | 455861 | 2    | 114  | 0.000924 | 41.7348 | cl42516   | dnaA superfamily                |
| XylFL0662B_640885_MIX8298_28787_64  | superfamily | 455861 | 2    | 112  | 4.01E-05 | 45.972  | cl42516   | dnaA superfamily                |
| Jumvir1_332470_gm4_1252_g           | superfamily | 455861 | 2    | 112  | 0.000831 | 41.7348 | cl42516   | dnaA superfamily                |
| Aspor1_1247_AO090005000898_mR_NA    | superfamily | 455861 | 100  | 168  | 0.00918  | 37.4976 | cl42516   | dnaA superfamily                |
| Schcon1_251754_e_gw1_10_244_1       | superfamily | 455861 | 190  | 283  | 0.007746 | 38.6532 | cl42516   | dnaA superfamily                |
| AcreTS7_1_143193_CE143192_6343      | superfamily | 455861 | 3    | 128  | 0.001036 | 41.3496 | cl42516   | dnaA superfamily                |

|                                               |             |        |     |     |          |         |           |                           |
|-----------------------------------------------|-------------|--------|-----|-----|----------|---------|-----------|---------------------------|
| Diadis1_852619_gm4_11879_g                    | superfamily | 455861 | 7   | 103 | 0.008256 | 38.6532 | cl42516   | dnaA superfamily          |
| FoxMRL8996_20006_CE20005_21708                | superfamily | 455861 | 258 | 336 | 0.003001 | 40.194  | cl42516   | dnaA superfamily          |
| Mictr1_40713_CE40712_4471                     | superfamily | 455861 | 192 | 329 | 0.000136 | 44.4312 | cl42516   | dnaA superfamily          |
| Hisca1_4559_HCAG_03289T0                      | specific    | 372351 | 131 | 193 | 0.006052 | 36.6427 | pfam12868 | DUF3824                   |
| Atrpi1_427855_gw1_26_319_1                    | specific    | 372351 | 112 | 187 | 0.000141 | 41.6503 | pfam12868 | DUF3824                   |
| Venin1_14690_atg2237_t1                       | superfamily | 444936 | 628 | 930 | 5.9E-149 | 458.728 | cl00490   | EUF superfamily           |
| Thiap1_629811_fgenesht1_pg_1_607              | superfamily | 425360 | 2   | 79  | 0.001771 | 40.0167 | cl41729   | KLF1_2_4_N superfamily    |
| Triatro1_496069_estExt_Genemark1_C_4_t20416   | superfamily | 425360 | 41  | 137 | 0.006992 | 38.4862 | cl41729   | KLF1_2_4_N superfamily    |
| Triat2_175759_gw1_24_1198_1                   | superfamily | 425360 | 20  | 116 | 0.005982 | 38.8714 | cl41729   | KLF1_2_4_N superfamily    |
| Tristr1_330518_fgenesht1_pm_4_433             | superfamily | 425360 | 41  | 138 | 0.000894 | 41.5678 | cl41729   | KLF1_2_4_N superfamily    |
| Thipu1_4259_transcript_KKA31188               | superfamily | 425360 | 4   | 90  | 8.65E-07 | 50.4274 | cl41729   | KLF1_2_4_N superfamily    |
| Coltof1_151894_mrna_11962                     | superfamily | 425360 | 12  | 124 | 0.00351  | 39.6418 | cl41729   | KLF1_2_4_N superfamily    |
| Trsp14807_422414_gm1_1034_g                   | superfamily | 425360 | 41  | 118 | 0.000443 | 42.3382 | cl41729   | KLF1_2_4_N superfamily    |
| Trich5757_1_363375_gm1_2451_g                 | superfamily | 425360 | 45  | 116 | 0.003189 | 39.6418 | cl41729   | KLF1_2_4_N superfamily    |
| Trichpleur1_115589_CE115588_9372              | superfamily | 425360 | 45  | 116 | 0.003197 | 39.6418 | cl41729   | KLF1_2_4_N superfamily    |
| TriTUC5505_1_380557_fgenesht1_pm_11_233       | superfamily | 425360 | 41  | 118 | 0.000452 | 42.3382 | cl41729   | KLF1_2_4_N superfamily    |
| Trihar1_765194_estExt_Genewise1PIus_C_7160016 | superfamily | 425360 | 42  | 118 | 0.005981 | 38.8714 | cl41729   | KLF1_2_4_N superfamily    |
| Triinh1_244336_CE244335_20274                 | superfamily | 425360 | 41  | 118 | 0.000255 | 43.1086 | cl41729   | KLF1_2_4_N superfamily    |
| Trigu1_9755_transcript_OPB43501               | superfamily | 425360 | 41  | 120 | 0.000685 | 41.953  | cl41729   | KLF1_2_4_N superfamily    |
| Trichl1_201667_CE201666_11505                 | superfamily | 425360 | 44  | 123 | 0.000122 | 44.2642 | cl41729   | KLF1_2_4_N superfamily    |
| Triam1_118465_CE118464_10836                  | superfamily | 425360 | 45  | 116 | 0.004081 | 39.2566 | cl41729   | KLF1_2_4_N superfamily    |
| Tripleu1_428883_gm1_9837_g                    | superfamily | 425360 | 45  | 116 | 0.004081 | 39.2566 | cl41729   | KLF1_2_4_N superfamily    |
| PseVKM4514_1_3566_transcript_KFY49258         | superfamily | 312941 | 1   | 132 | 9.89E-05 | 44.9992 | cl26621   | Med15 superfamily         |
| Hymvar1_383815_e_gw1_23_406_1                 | superfamily | 130689 | 157 | 291 | 0.000941 | 41.331  | cl31127   | PABP-1234 superfamily     |
| Chafu1_19811_CE19810_6907                     | superfamily | 130689 | 1   | 91  | 0.00073  | 41.7162 | cl31127   | PABP-1234 superfamily     |
| Cha1176438_49774_gm1_2568_g                   | superfamily | 130689 | 1   | 91  | 0.00073  | 41.7162 | cl31127   | PABP-1234 superfamily     |
| Rufri1_622838_fgenesht1_pg_6_218              | superfamily | 130689 | 217 | 347 | 0.00142  | 40.9458 | cl31127   | PABP-1234 superfamily     |
| Sceap1_6147_transcript_KEZ44234               | superfamily | 130689 | 236 | 348 | 0.001471 | 40.9458 | cl31127   | PABP-1234 superfamily     |
| Neo1551_1_516674_fgenesht1_pg_7_468           | superfamily | 130689 | 3   | 102 | 0.004098 | 39.405  | cl31127   | PABP-1234 superfamily     |
| Lompr1_7146_transcript_PKS10546               | superfamily | 130689 | 211 | 337 | 9.65E-05 | 44.7978 | cl31127   | PABP-1234 superfamily     |
| Madmy1_8370_transcript_KXK75111               | superfamily | 130689 | 1   | 93  | 1.27E-05 | 47.4942 | cl31127   | PABP-1234 superfamily     |
| Apope1_526361_fgenesht1_pg_1_257              | superfamily | 130689 | 14  | 118 | 0.000663 | 42.1014 | cl31127   | PABP-1234 superfamily     |
| Lopnit1_1_882391_estExt_fgenesht1_pg_C_200005 | superfamily | 130689 | 203 | 312 | 0.001191 | 41.331  | cl31127   | PABP-1234 superfamily     |
| Metani1_2354_transcript_KID62818              | superfamily | 130689 | 11  | 130 | 0.000781 | 42.1014 | cl31127   | PABP-1234 superfamily     |
| Metac1_4580_MAC_04580m_01                     | superfamily | 130689 | 66  | 155 | 0.000316 | 42.8718 | cl31127   | PABP-1234 superfamily     |
| Verdah1_134688_CE134687_6187                  | superfamily | 130689 | 5   | 123 | 0.000366 | 42.8718 | cl31127   | PABP-1234 superfamily     |
| Verda1_5063_VDAG_08715T0                      | superfamily | 130689 | 5   | 123 | 0.000366 | 42.8718 | cl31127   | PABP-1234 superfamily     |
| Verlo1_11709_transcript_CRK29048              | superfamily | 130689 | 5   | 123 | 0.000432 | 42.8718 | cl31127   | PABP-1234 superfamily     |
| Plecuc1_16114_CE16113_6414                    | superfamily | 130689 | 72  | 146 | 0.000998 | 41.331  | cl31127   | PABP-1234 superfamily     |
| Amyenc1_483564_gm1_4464_g                     | superfamily | 130689 | 186 | 316 | 3.99E-06 | 49.035  | cl31127   | PABP-1234 superfamily     |
| Colto1_12009_CT0861_12714T0                   | superfamily | 130689 | 17  | 122 | 0.002861 | 39.7902 | cl31127   | PABP-1234 superfamily     |
| Coltof1_151894_mrna_11962                     | superfamily | 130689 | 78  | 183 | 0.002829 | 40.1754 | cl31127   | PABP-1234 superfamily     |
| XyFL0641_1_188314_CE188313_22407              | superfamily | 130689 | 6   | 109 | 0.00215  | 40.1754 | cl31127   | PABP-1234 superfamily     |
| Sepmu1_151278_estExt_fgenesht1_kq_C_90397     | superfamily | 130689 | 97  | 192 | 0.000211 | 43.6422 | cl31127   | PABP-1234 superfamily     |
| Mictr1_40713_CE40712_4471                     | superfamily | 130689 | 3   | 107 | 0.00026  | 43.257  | cl31127   | PABP-1234 superfamily     |
| Chain1_1910_g9825_t1                          | superfamily | 130689 | 4   | 115 | 0.000714 | 42.1014 | cl31127   | PABP-1234 superfamily     |
| Zalva1_485242_e_gw1_16_406_1                  | superfamily | 130689 | 184 | 289 | 0.000277 | 43.257  | cl31127   | PABP-1234 superfamily     |
| Metma1_3325_XM_014722953_1                    | superfamily | 401645 | 23  | 151 | 0.000486 | 42.7156 | cl37801   | PAT1 superfamily          |
| Metro1_5307_MAA_00244T0                       | superfamily | 401645 | 23  | 151 | 0.000609 | 42.3304 | cl37801   | PAT1 superfamily          |
| Trimi1_164_CE163_26028                        | superfamily | 401645 | 45  | 161 | 0.00132  | 41.56   | cl37801   | PAT1 superfamily          |
| Metbr1_9792_XM_014688378_1                    | superfamily | 401645 | 23  | 151 | 0.00057  | 42.3304 | cl37801   | PAT1 superfamily          |
| Bissp1_5097_CE5096_6905                       | superfamily | 401645 | 117 | 275 | 0.000235 | 43.486  | cl37801   | PAT1 superfamily          |
| Verlo1_4104_transcript_CRK15280               | superfamily | 401645 | 3   | 114 | 5.9E-06  | 48.8788 | cl37801   | PAT1 superfamily          |
| Triple1_114784_g8068_t1                       | superfamily | 401645 | 47  | 143 | 0.001969 | 40.7896 | cl37801   | PAT1 superfamily          |
| Clasph1_6086_CSPH_05655_R0                    | superfamily | 227507 | 97  | 138 | 0.001761 | 40.4775 | cl34930   | PBP1 superfamily          |
| Crymi1_2023_B0A49_11289                       | superfamily | 227507 | 144 | 243 | 1.41E-05 | 47.0259 | cl34930   | PBP1 superfamily          |
| Colgr1_1810_GLRG_04463T0                      | superfamily | 226193 | 2   | 85  | 0.000231 | 42.9417 | cl43925   | PcoB superfamily          |
| XyFL1019_137951_CE137950_18915                | superfamily | 330753 | 21  | 114 | 0.001841 | 40.4564 | cl25932   | Peptidase_S21 superfamily |
| Annbov1_251920_CE251919_14019                 | superfamily | 223021 | 5   | 144 | 0.001541 | 41.0773 | cl33720   | PHA03247 superfamily      |
| Annmin1_329283_gm1_490_g                      | superfamily | 223021 | 5   | 145 | 0.000462 | 43.0033 | cl33720   | PHA03247 superfamily      |
| Annsty1_155322_CE155321_7353                  | superfamily | 223021 | 5   | 145 | 0.003174 | 40.3069 | cl33720   | PHA03247 superfamily      |
| Roster1_494467_gm1_6620_g                     | superfamily | 223021 | 5   | 145 | 0.003174 | 40.3069 | cl33720   | PHA03247 superfamily      |
| Daldec1_224570_CE224569_8271                  | superfamily | 223021 | 6   | 145 | 0.00364  | 39.9217 | cl33720   | PHA03247 superfamily      |
| Dales1_423710_MIX294_11467_71                 | superfamily | 223021 | 6   | 145 | 0.003852 | 39.9217 | cl33720   | PHA03247 superfamily      |
| DallocAZ0526_2_490751_fgenesht1_pm_2_85       | superfamily | 223021 | 6   | 145 | 0.002816 | 40.3069 | cl33720   | PHA03247 superfamily      |
| Dalloc1_313432_gm1_2561_g                     | superfamily | 223021 | 6   | 145 | 0.002234 | 40.6921 | cl33720   | PHA03247 superfamily      |
| Dallocu1_388845_gm1_6813_g                    | superfamily | 223021 | 6   | 145 | 0.003899 | 39.9217 | cl33720   | PHA03247 superfamily      |
| DaFL1419_1_367082_MIX5342_4334_60             | superfamily | 223021 | 6   | 145 | 0.00217  | 40.6921 | cl33720   | PHA03247 superfamily      |
| DaIver1_267486_MIX156_2696_43                 | superfamily | 223021 | 6   | 145 | 0.002034 | 40.6921 | cl33720   | PHA03247 superfamily      |
| Hypmon1_287138_MIX702_18639_70                | superfamily | 223021 | 5   | 145 | 0.001708 | 41.0773 | cl33720   | PHA03247 superfamily      |
| Hyprub1_179356_CE179355_14308                 | superfamily | 223021 | 18  | 147 | 0.001381 | 41.4625 | cl33720   | PHA03247 superfamily      |
| Hypsub2_156754_CE156753_20272                 | superfamily | 223021 | 5   | 145 | 0.005171 | 39.5365 | cl33720   | PHA03247 superfamily      |
| Hypcro1_458351_MIX184_25796_68                | superfamily | 223021 | 5   | 142 | 0.000655 | 42.2329 | cl33720   | PHA03247 superfamily      |
| Hypfus1_15792_CE15791_11059                   | superfamily | 223021 | 7   | 147 | 0.000117 | 44.9293 | cl33720   | PHA03247 superfamily      |
| Hypvin1_356358_fgenesht1_pg_1_757             | superfamily | 223021 | 7   | 157 | 0.00084  | 42.2329 | cl33720   | PHA03247 superfamily      |
| Hyptru1_380867_CE380866_10070                 | superfamily | 223021 | 5   | 145 | 0.003691 | 39.9217 | cl33720   | PHA03247 superfamily      |

|          |                                                |             |        |     |     |          |         |         |                          |
|----------|------------------------------------------------|-------------|--------|-----|-----|----------|---------|---------|--------------------------|
|          | HybrubER1909_1_3805_CE3804_5993                | superfamily | 223021 | 7   | 147 | 0.001267 | 41.4625 | cl33720 | PHA03247 superfamily     |
|          | HyFL1150_1_80045_CE80044_37373                 | superfamily | 223021 | 18  | 147 | 0.00243  | 40.6921 | cl33720 | PHA03247 superfamily     |
|          | Whamic1_482316_CE482315_15215                  | superfamily | 223021 | 5   | 147 | 0.000822 | 42.2329 | cl33720 | PHA03247 superfamily     |
|          | Tryvi1_528452_gm1_798_g                        | superfamily | 223021 | 179 | 244 | 0.000247 | 43.3885 | cl33720 | PHA03247 superfamily     |
|          | Xylarb124340_1_478397_MIX1243_1729_29          | superfamily | 223021 | 5   | 150 | 0.000287 | 43.3885 | cl33720 | PHA03247 superfamily     |
|          | Truan1_653227_gm1_1078_g                       | superfamily | 223021 | 12  | 149 | 0.005487 | 39.5365 | cl33720 | PHA03247 superfamily     |
|          | Scbo1_1351_transcript_ES298255                 | superfamily | 223021 | 9   | 312 | 0.006973 | 39.1513 | cl33720 | PHA03247 superfamily     |
|          | Humgr1_5688_Humgr2_002523_RA                   | superfamily | 223021 | 7   | 139 | 0.002308 | 40.3069 | cl33720 | PHA03247 superfamily     |
|          | ExoJF061F_1_574228_fgenes1_pm13_150            | superfamily | 223021 | 6   | 96  | 0.007345 | 38.7661 | cl33720 | PHA03247 superfamily     |
|          | XyFL0821_1_108665_CE108664_65662               | superfamily | 223021 | 6   | 108 | 0.000915 | 41.8477 | cl33720 | PHA03247 superfamily     |
|          | XylFL0016_361606_CE361605_8416                 | superfamily | 223021 | 2   | 105 | 0.007029 | 39.1513 | cl33720 | PHA03247 superfamily     |
|          | XyFL0804_2_218388_CE218387_17711               | superfamily | 165527 | 6   | 109 | 0.007883 | 38.556  | cl29788 | PHA03269 superfamily     |
|          | Cadsp1_424734_e_gw1_76_23_1                    | superfamily | 177614 | 67  | 191 | 0.001705 | 40.4212 | cl31823 | PHA03377 superfamily     |
|          | Bombom1_335583_CE335582_4658                   | superfamily | 223065 | 52  | 132 | 0.007901 | 37.7392 | cl33729 | PHA03378 superfamily     |
|          | NeoP8C63_1_97988_CE97987_10630                 | superfamily | 236669 | 183 | 323 | 2.16E-05 | 47.0019 | cl35903 | PRK10263 superfamily     |
|          | Delst1_395606_gm1_1540_g                       | superfamily | 236669 | 135 | 242 | 0.001127 | 41.2239 | cl35903 | PRK10263 superfamily     |
|          | Spoth2_113912_Spoth1_estExt_fgenes1_pm_C_20389 | superfamily | 236669 | 2   | 96  | 0.001032 | 41.6091 | cl35903 | PRK10263 superfamily     |
|          | Corsim1_58666_fgenes1_pg_4_383                 | superfamily | 236669 | 2   | 97  | 8.73E-05 | 45.0759 | cl35903 | PRK10263 superfamily     |
|          | Lepor2_497062_e_gw1_29_3_1                     | superfamily | 236669 | 154 | 285 | 0.006505 | 38.9127 | cl35903 | PRK10263 superfamily     |
|          | Leptod1_303346_e_gw1_69_144_1                  | superfamily | 236669 | 154 | 285 | 0.006505 | 38.9127 | cl35903 | PRK10263 superfamily     |
|          | Anmmor1_456183_gm1_3848_g                      | superfamily | 236669 | 7   | 147 | 0.003892 | 39.6831 | cl35903 | PRK10263 superfamily     |
|          | Phisu1_1167_transcript_CZR51295                | superfamily | 236669 | 190 | 311 | 0.005487 | 39.2979 | cl35903 | PRK10263 superfamily     |
|          | Phiglo1_14671_CE14670_2614                     | superfamily | 236669 | 4   | 83  | 0.002258 | 40.4535 | cl35903 | PRK10263 superfamily     |
|          | Phisc1_694098_fgenes1_pm_3_428                 | superfamily | 236669 | 163 | 266 | 0.006783 | 38.9127 | cl35903 | PRK10263 superfamily     |
|          | Macph1_8076_MPH_08247m_01                      | superfamily | 236669 | 129 | 224 | 0.002987 | 39.6831 | cl35903 | PRK10263 superfamily     |
|          | Macpha1_239582_CE239581_4114                   | superfamily | 236669 | 129 | 224 | 0.002962 | 39.6831 | cl35903 | PRK10263 superfamily     |
|          | Veral1_7293_VDBG_04492T0                       | superfamily | 236669 | 1   | 152 | 0.00166  | 40.4535 | cl35903 | PRK10263 superfamily     |
|          | Triasp1_175715_CE175714_15240                  | superfamily | 236669 | 56  | 157 | 0.00942  | 38.9127 | cl35903 | PRK10263 superfamily     |
|          | llysp1_688718_CE688717_4882                    | superfamily | 236669 | 65  | 177 | 0.000151 | 43.5351 | cl35903 | PRK10263 superfamily     |
|          | Botci1_15389_BC1T_11858                        | superfamily | 236669 | 63  | 203 | 0.004235 | 38.9127 | cl35903 | PRK10263 superfamily     |
|          | llyeu1_164583_CE164582_12239                   | superfamily | 236669 | 41  | 153 | 0.000131 | 43.5351 | cl35903 | PRK10263 superfamily     |
|          | Scisc1_11781_SS1G_04810T0                      | superfamily | 236669 | 159 | 294 | 0.003178 | 40.0683 | cl35903 | PRK10263 superfamily     |
|          | Helsp1_265149_CE265148_4333                    | superfamily | 236669 | 134 | 261 | 0.000174 | 43.9203 | cl35903 | PRK10263 superfamily     |
|          | llyrob1_339539_e_gw1_2_1828_1                  | superfamily | 236669 | 234 | 346 | 0.00098  | 41.9943 | cl35903 | PRK10263 superfamily     |
|          | Tricre1_359307_fgenes1_pm_88_17                | superfamily | 236669 | 21  | 140 | 0.001327 | 41.6091 | cl35903 | PRK10263 superfamily     |
|          | Conioc1_1223138_gm1_13786_g                    | superfamily | 236669 | 201 | 296 | 0.003013 | 40.0683 | cl35903 | PRK10263 superfamily     |
|          | Exool1_141753_PV06_05994T0                     | superfamily | 237865 | 16  | 135 | 0.001222 | 41.2384 | cl36447 | PRK14951 superfamily     |
|          | Chame1_15830_CE15829_4335                      | superfamily | 184923 | 37  | 83  | 0.002141 | 40.4335 | cl33044 | PRK14959 superfamily     |
|          | Veral1_7293_VDBG_04492T0                       | superfamily | 227505 | 87  | 158 | 0.000486 | 42.2725 | cl34928 | PRP8 superfamily         |
|          | Loppic1_106226_CE106225_3135                   | superfamily | 185594 | 183 | 330 | 0.001797 | 40.8288 | cl33180 | PTZ00395 superfamily     |
|          | XylFL2044_770840_fgenes1_pm_14_15              | superfamily | 185594 | 2   | 121 | 0.000589 | 42.3695 | cl33180 | PTZ00395 superfamily     |
|          | Amore1_29369_fgenes1_pg_9_17                   | superfamily | 185594 | 160 | 313 | 0.001063 | 41.5991 | cl33180 | PTZ00395 superfamily     |
|          | Horac1_312459_fgenes1_pg_9_192                 | superfamily | 185594 | 5   | 113 | 0.00127  | 41.2139 | cl33180 | PTZ00395 superfamily     |
|          | Psene1_2233944_fgenes1_pm_11_17                | superfamily | 227709 | 64  | 192 | 0.0007   | 41.4151 | cl34999 | ROM1 superfamily         |
|          | Oidneo1_278_ma_gnl_WGS_MCFK_OnM2_107002T       | superfamily | 227709 | 205 | 333 | 0.000783 | 42.1855 | cl34999 | ROM1 superfamily         |
|          | Erypi2_2313634_e_gw1_35_62_1                   | superfamily | 227709 | 192 | 320 | 0.00824  | 38.7187 | cl34999 | ROM1 superfamily         |
|          | Erypu1_4448_transcript_POS88000                | superfamily | 227709 | 198 | 326 | 0.000559 | 42.5707 | cl34999 | ROM1 superfamily         |
|          | Aspcej1_44738_CE44737_49                       | superfamily | 435798 | 162 | 219 | 0.000354 | 39.332  | cl29068 | SGP superfamily          |
|          | Cryan3_374345_CE374344_3122                    | superfamily | 400730 | 171 | 223 | 0.000604 | 41.9996 | cl25487 | SWI-SNF_Ssr4 superfamily |
|          | Crymi1_8611_B0A49_04274                        | superfamily | 400730 | 150 | 202 | 0.005148 | 38.918  | cl25487 | SWI-SNF_Ssr4 superfamily |
|          | Xylbam139988_1_638787_fgenes1_pm_49_60         | superfamily | 425992 | 91  | 158 | 0.002771 | 39.1702 | cl03073 | TYA superfamily          |
|          | Neora1_565526_e_gw1_3_1060_1                   | superfamily | 425992 | 274 | 363 | 0.000652 | 41.8666 | cl03073 | TYA superfamily          |
| Pez-VelC | Trikon1_14646_CE14645_5374                     | superfamily | 427171 | 58  | 231 | 6.65E-06 | 48.6094 | cl38111 | Atrophin-1 superfamily   |
|          | Tri6649_1_14918_CE14917_10587                  | superfamily | 427171 | 41  | 232 | 9.73E-05 | 44.7574 | cl38111 | Atrophin-1 superfamily   |
|          | Trigam1_10529_TGAM01_02329T0                   | superfamily | 427171 | 5   | 234 | 1.66E-06 | 50.5354 | cl38111 | Atrophin-1 superfamily   |
|          | Triatr1_215179_CE215178_19387                  | superfamily | 427171 | 56  | 231 | 4.51E-05 | 45.913  | cl38111 | Atrophin-1 superfamily   |
|          | Triatro1_258993_CE258992_14165                 | superfamily | 427171 | 56  | 231 | 4.51E-05 | 45.913  | cl38111 | Atrophin-1 superfamily   |
|          | Triatrov1_178878_CE178877_3097                 | superfamily | 427171 | 56  | 231 | 4.51E-05 | 45.913  | cl38111 | Atrophin-1 superfamily   |
|          | Tritai1_82852_CE82851_5785                     | superfamily | 427171 | 41  | 232 | 9.73E-05 | 44.7574 | cl38111 | Atrophin-1 superfamily   |
|          | Triaus1_319816_fgenes1_pm_11_47                | superfamily | 427171 | 15  | 217 | 0.000125 | 44.7574 | cl38111 | Atrophin-1 superfamily   |
|          | Fusps1_10113_FPSE_11893T0                      | superfamily | 427171 | 4   | 182 | 0.001615 | 40.9054 | cl38111 | Atrophin-1 superfamily   |
|          | Trigha1_468975_fgenes1_pm_5_128                | superfamily | 427171 | 192 | 432 | 1.82E-07 | 54.3874 | cl38111 | Atrophin-1 superfamily   |
|          | Kalbru1_871751_fgenes1_pm_65_1                 | superfamily | 427171 | 1   | 141 | 4.47E-07 | 52.0762 | cl38111 | Atrophin-1 superfamily   |
|          | Tubbr1_1_891583_e_gw1_288_18_1                 | superfamily | 427171 | 15  | 167 | 0.000519 | 42.4462 | cl38111 | Atrophin-1 superfamily   |
|          | Trifer1_67891_CE67890_1573                     | superfamily | 427171 | 19  | 226 | 5.85E-08 | 55.1578 | cl38111 | Atrophin-1 superfamily   |
|          | Triheli1_7208_CE7207_3904                      | superfamily | 427171 | 19  | 233 | 3.1E-09  | 59.395  | cl38111 | Atrophin-1 superfamily   |
|          | Triaru1_3934_ma4755                            | superfamily | 427171 | 7   | 215 | 0.002544 | 40.135  | cl38111 | Atrophin-1 superfamily   |
|          | Triev1_16638_CE16637_3445                      | superfamily | 427171 | 41  | 230 | 6.32E-05 | 45.5278 | cl38111 | Atrophin-1 superfamily   |
|          | Cyloi1_57769_CE57768_2273                      | superfamily | 427171 | 35  | 246 | 2.42E-08 | 56.6986 | cl38111 | Atrophin-1 superfamily   |
|          | Lepmu1_7241_Lema_T121860_1                     | superfamily | 227270 | 28  | 180 | 0.002866 | 40.5126 | cl34841 | COG4934 superfamily      |
|          | Aspins1_179956_CE179955_622                    | superfamily | 227430 | 113 | 203 | 0.002882 | 40.115  | cl34901 | COG5099 superfamily      |
|          | Tubae1_3358_GSTUAT00001721001                  | superfamily | 227430 | 18  | 189 | 0.000414 | 42.8114 | cl34901 | COG5099 superfamily      |
|          | Trepe1_565784_gm1_8776_g                       | superfamily | 455861 | 19  | 168 | 8.33E-05 | 44.8164 | cl42516 | dnaA superfamily         |
|          | Hypmon1_279203_gm1_5127_g                      | superfamily | 455861 | 27  | 252 | 0.006264 | 39.0384 | cl42516 | dnaA superfamily         |
|          | Tristr1_233395_CE233394_6826                   | superfamily | 455861 | 73  | 211 | 0.00163  | 40.9644 | cl42516 | dnaA superfamily         |

|                                                    |             |        |     |     |          |         |           |                             |
|----------------------------------------------------|-------------|--------|-----|-----|----------|---------|-----------|-----------------------------|
| Triint1_75035_CE75034_3341                         | superfamily | 455861 | 101 | 240 | 0.000303 | 43.2756 | cl42516   | dnaA superfamily            |
| HypCO275_1_11909_fgenes1_pg_5_4_35                 | superfamily | 455861 | 40  | 240 | 0.000108 | 44.4312 | cl42516   | dnaA superfamily            |
| Hyphv1_688242_gm4_7614_g                           | superfamily | 455861 | 40  | 240 | 0.000125 | 44.4312 | cl42516   | dnaA superfamily            |
| Lizem1_36413_gw1_27_338_1                          | superfamily | 455861 | 21  | 248 | 9.81E-06 | 47.898  | cl42516   | dnaA superfamily            |
| Apiver1_70619_CE70618_245                          | superfamily | 455861 | 42  | 213 | 5.75E-05 | 45.5868 | cl42516   | dnaA superfamily            |
| DaFL1419_1_345842_gm1_2794_g                       | superfamily | 455861 | 67  | 248 | 0.007289 | 38.6532 | cl42516   | dnaA superfamily            |
| Colna1_302265_CE302264_5477                        | superfamily | 455861 | 26  | 152 | 4.31E-05 | 45.972  | cl42516   | dnaA superfamily            |
| Dalgra1_311392_CE311391_8671                       | superfamily | 455861 | 67  | 236 | 0.000219 | 43.6608 | cl42516   | dnaA superfamily            |
| Plecu1_246869_CE246868_25627                       | superfamily | 455861 | 12  | 211 | 2.79E-07 | 52.9056 | cl42516   | dnaA superfamily            |
| Aqupat1_699847_gm1_11594_g                         | superfamily | 455861 | 2   | 218 | 2.95E-08 | 55.9871 | cl42516   | dnaA superfamily            |
| Phomu1_476075_gm1_9353_g                           | superfamily | 455861 | 21  | 224 | 1.55E-06 | 50.5944 | cl42516   | dnaA superfamily            |
| Epini1_337701_e_gw1_17_9_1                         | superfamily | 455861 | 21  | 223 | 0.000781 | 41.7348 | cl42516   | dnaA superfamily            |
| Didma1_15877_g1981_t1                              | superfamily | 455861 | 21  | 167 | 1.27E-06 | 52.5204 | cl42516   | dnaA superfamily            |
| Didsa1_488267_gm1_7399_g                           | superfamily | 455861 | 5   | 160 | 0.002029 | 40.5792 | cl42516   | dnaA superfamily            |
| Macan1_457067_gm1_4121_1                           | superfamily | 455861 | 21  | 167 | 2.21E-05 | 46.7424 | cl42516   | dnaA superfamily            |
| Plecucu2_11109_CE11108_738                         | superfamily | 455861 | 33  | 198 | 1.04E-08 | 57.1427 | cl42516   | dnaA superfamily            |
| Didex1_6159_gm1_6159_g                             | superfamily | 455861 | 1   | 223 | 4.78E-05 | 45.5868 | cl42516   | dnaA superfamily            |
| Altsp012_1_510500_fgenes1_pg_5_785                 | superfamily | 455861 | 16  | 232 | 1.36E-06 | 50.5944 | cl42516   | dnaA superfamily            |
| Altsp017_1_123168_CE123167_7233                    | superfamily | 455861 | 16  | 232 | 1.31E-06 | 50.5944 | cl42516   | dnaA superfamily            |
| Altte1_111178_AT2CTG_122_jigsaw_mRNA_141           | superfamily | 455861 | 66  | 245 | 1.8E-05  | 47.1276 | cl42516   | dnaA superfamily            |
| Amnli1_164115_CE164114_2601                        | superfamily | 455861 | 19  | 200 | 6.01E-08 | 55.2167 | cl42516   | dnaA superfamily            |
| Ampqui1_471313_estExt_Genewise1_C_3_t20278         | superfamily | 455861 | 24  | 245 | 0.000112 | 44.4312 | cl42516   | dnaA superfamily            |
| Altfr1_234601_AFGCTG_165_jigsaw_mRNA_1             | superfamily | 455861 | 66  | 245 | 2.18E-05 | 46.7424 | cl42516   | dnaA superfamily            |
| Altli1_253221_ATKCTG_335_jigsaw_mRNA_5             | superfamily | 455861 | 66  | 245 | 2.12E-05 | 46.7424 | cl42516   | dnaA superfamily            |
| Altlo1_255229_ALGCTG_20_jigsaw_mRNA_31             | superfamily | 455861 | 66  | 245 | 3.45E-05 | 46.3572 | cl42516   | dnaA superfamily            |
| Altro1_80517_CE80516_5885                          | superfamily | 455861 | 20  | 183 | 4.27E-05 | 45.972  | cl42516   | dnaA superfamily            |
| Alalt1_121975_ATNCTG_79_jigsaw_mRNA_90             | superfamily | 455861 | 66  | 245 | 2.12E-05 | 46.7424 | cl42516   | dnaA superfamily            |
| Alalte1_113147_AATCTG_71_jigsaw_mRNA_77            | superfamily | 455861 | 66  | 245 | 2.12E-05 | 46.7424 | cl42516   | dnaA superfamily            |
| Aalte1_122331_AA2CTG_80_jigsaw_mRNA_96             | superfamily | 455861 | 66  | 245 | 2.12E-05 | 46.7424 | cl42516   | dnaA superfamily            |
| Altalt1_355135_e_gw1_5_738_1                       | superfamily | 455861 | 66  | 245 | 2.12E-05 | 46.7424 | cl42516   | dnaA superfamily            |
| Altal1_34254_CE34253_6289                          | superfamily | 455861 | 66  | 245 | 2.12E-05 | 46.7424 | cl42516   | dnaA superfamily            |
| Altci1_113738_ACTCTG_1024_jigsaw_mRNA_5            | superfamily | 455861 | 66  | 245 | 2.12E-05 | 46.7424 | cl42516   | dnaA superfamily            |
| Amal3063_116065_AMLCTG_1295_jigsaw_mRNA_14         | superfamily | 455861 | 67  | 246 | 2.04E-05 | 47.1276 | cl42516   | dnaA superfamily            |
| Amal3064_119548_AM2CTG_211_jigsaw_mRNA_14          | superfamily | 455861 | 66  | 245 | 2.12E-05 | 46.7424 | cl42516   | dnaA superfamily            |
| Altga1_267021_AGSCCTG_1827_jigsaw_mRNA_1           | superfamily | 455861 | 66  | 245 | 2.18E-05 | 46.7424 | cl42516   | dnaA superfamily            |
| Pyrinf1_56837_CE56836_7349                         | superfamily | 455861 | 20  | 186 | 0.000124 | 44.4312 | cl42516   | dnaA superfamily            |
| Pyrsp1_284712_CE284711_8520                        | superfamily | 455861 | 20  | 186 | 0.000122 | 44.4312 | cl42516   | dnaA superfamily            |
| PlePMI138_1_294216_estExt_Genewise1_C_21_t10035    | superfamily | 455861 | 21  | 145 | 0.001664 | 40.9644 | cl42516   | dnaA superfamily            |
| Plesi1_496476_gm1_258_g                            | superfamily | 455861 | 1   | 233 | 7.27E-05 | 45.2016 | cl42516   | dnaA superfamily            |
| PhaPMI808_777953_gm1_12249_g                       | superfamily | 455861 | 20  | 245 | 0.000416 | 42.8904 | cl42516   | dnaA superfamily            |
| Denna1_93401_CE93400_2622                          | superfamily | 455861 | 54  | 277 | 0.000107 | 44.8164 | cl42516   | dnaA superfamily            |
| Fenfe1_150748_CE150747_5247                        | superfamily | 455861 | 32  | 188 | 4.23E-05 | 45.972  | cl42516   | dnaA superfamily            |
| Melpu1_368259_gm1_13282_g                          | superfamily | 455861 | 15  | 212 | 1.27E-05 | 47.5128 | cl42516   | dnaA superfamily            |
| Linin1_82629_CE82628_435                           | superfamily | 455861 | 62  | 188 | 1.75E-07 | 53.6759 | cl42516   | dnaA superfamily            |
| Masph1_603996_gm1_3561_g                           | superfamily | 455861 | 19  | 177 | 1.95E-05 | 47.1276 | cl42516   | dnaA superfamily            |
| Lepmi1_490062_gm1_9883_g                           | superfamily | 455861 | 1   | 224 | 0.003036 | 39.8088 | cl42516   | dnaA superfamily            |
| Ophdi1_303097_e_gw1_22_348_1                       | superfamily | 455861 | 24  | 188 | 0.000376 | 42.8904 | cl42516   | dnaA superfamily            |
| Boeex1_414344_gm1_7117_g                           | superfamily | 455861 | 21  | 225 | 9.39E-05 | 44.8164 | cl42516   | dnaA superfamily            |
| Perma1_514955_e_gw1_10_385_1                       | superfamily | 455861 | 26  | 149 | 1.57E-07 | 53.2907 | cl42516   | dnaA superfamily            |
| Phapo1_386153_CE386152_3326                        | superfamily | 455861 | 24  | 247 | 0.001135 | 41.3496 | cl42516   | dnaA superfamily            |
| Stasp1_43754_CE43753_2824                          | superfamily | 455861 | 24  | 247 | 0.000712 | 42.12   | cl42516   | dnaA superfamily            |
| Daral1_846723_fgenes1_pg_8_92                      | superfamily | 455861 | 30  | 236 | 0.000952 | 41.7348 | cl42516   | dnaA superfamily            |
| PseVKM4246_1_5087_transcript_KFY06812              | specific    | 403112 | 409 | 606 | 5.04E-28 | 112.173 | pfam11807 | DUF3328                     |
| Verlo1_7189_transcript_CRK21276                    | specific    | 427294 | 757 | 986 | 2.32E-92 | 297.441 | pfam03441 | FAD_binding_7               |
| Pse1611_1_87933_CE87932_36050                      | superfamily | 235904 | 47  | 125 | 0.002297 | 40.3347 | cl35529   | flhF superfamily            |
| Stach1_6950_transcript_KFA75101                    | superfamily | 235904 | 61  | 190 | 0.001187 | 41.1051 | cl35529   | flhF superfamily            |
| Aspcru1_117840_CE117839_1508                       | superfamily | 406402 | 87  | 225 | 6E-05    | 44.9205 | cl25765   | G_path_suppress superfamily |
| Clasph1_3210_CSPH_06797_R0                         | superfamily | 282904 | 11  | 211 | 2.6E-06  | 51.4556 | cl37540   | Herpes BLLF1 superfamily    |
| Xylint1_531850_fgenes1_pm_55_26                    | superfamily | 282904 | 26  | 192 | 0.001046 | 41.4404 | cl37540   | Herpes BLLF1 superfamily    |
| Tubmes1_3274166_e_gw1_62_18_1                      | superfamily | 430088 | 22  | 244 | 0.000113 | 44.4357 | cl25816   | KAR9 superfamily            |
| Thest1_6454_NODE_644_length_767692_cov_86_g3751_t1 | superfamily | 425360 | 271 | 351 | 0.000804 | 42.374  | cl41729   | KLF1_2_4_N superfamily      |
| Fustr1_583163_fgenes1_pm_2_734                     | superfamily | 425360 | 18  | 91  | 0.007258 | 38.101  | cl41729   | KLF1_2_4_N superfamily      |
| Gyrinf1_909377_gm1_2830_g                          | superfamily | 312941 | 44  | 131 | 0.006282 | 38.836  | cl26621   | Med15 superfamily           |
| Dalcal1_451435_fgenes1_pm_10_55                    | superfamily | 130689 | 25  | 153 | 0.000478 | 42.4866 | cl31127   | PABP-1234 superfamily       |
| Tricer1_163848_CE163847_24685                      | superfamily | 130689 | 50  | 209 | 0.002463 | 40.1754 | cl31127   | PABP-1234 superfamily       |
| Torhe1_5577_VHEMI05184_1                           | superfamily | 130689 | 97  | 218 | 0.00513  | 39.0198 | cl31127   | PABP-1234 superfamily       |
| Tricre1_59734_CE59733_3478                         | superfamily | 130689 | 50  | 183 | 0.002785 | 40.1754 | cl31127   | PABP-1234 superfamily       |
| Psemus1_11545_transcript_KXT14792                  | superfamily | 401645 | 6   | 246 | 5.14E-05 | 45.7972 | cl37801   | PAT1 superfamily            |
| Geocar1_718935_fgenes1_pm_32_57                    | superfamily | 401645 | 3   | 136 | 0.000472 | 42.7156 | cl37801   | PAT1 superfamily            |
| Cormi1_2376_CCM_02384m_01                          | superfamily | 401645 | 5   | 156 | 0.000121 | 43.486  | cl37801   | PAT1 superfamily            |



|                                              |             |        |     |     |          |         |         |                           |
|----------------------------------------------|-------------|--------|-----|-----|----------|---------|---------|---------------------------|
| CodFL1790_1_97065_CE97064_7752               | superfamily | 401645 | 40  | 279 | 0.000284 | 43.486  | cl37801 | PAT1 superfamily          |
| Fusve2_16812_FVEG_05214T0                    | superfamily | 401645 | 1   | 172 | 3.13E-06 | 49.6492 | cl37801 | PAT1 superfamily          |
| Neo1551_1_372221_CE372220_3621               | superfamily | 401645 | 49  | 150 | 0.001503 | 41.1748 | cl37801 | PAT1 superfamily          |
| Trichl1_184709_CE184708_7657                 | superfamily | 401645 | 55  | 195 | 0.004549 | 39.634  | cl37801 | PAT1 superfamily          |
| Neobo1_508674_e_gw1_11_141_1                 | superfamily | 330753 | 56  | 165 | 0.000729 | 41.9972 | cl25932 | Peptidase_S21 superfamily |
| Micbo1_170925_fgenesh1_pg_1_796              | superfamily | 223021 | 7   | 195 | 8.36E-05 | 45.3145 | cl33720 | PHA03247 superfamily      |
| Maseb1_413359_e_gw1_42_55_1                  | superfamily | 223021 | 4   | 129 | 1.27E-05 | 48.0109 | cl33720 | PHA03247 superfamily      |
| Lopma1_677411_fgenesh1_pg_40_43              | superfamily | 223021 | 47  | 243 | 0.000677 | 42.6181 | cl33720 | PHA03247 superfamily      |
| Lenfl1_317782_e_gw1_46_187_1                 | superfamily | 223021 | 24  | 227 | 2.02E-06 | 50.3221 | cl33720 | PHA03247 superfamily      |
| Hyppo1_518568_fgenesh1_pm_6_268              | superfamily | 223021 | 4   | 231 | 0.000149 | 44.5441 | cl33720 | PHA03247 superfamily      |
| Jahaq1_94727_CE94726_4172                    | superfamily | 223021 | 21  | 276 | 6.19E-06 | 49.1665 | cl33720 | PHA03247 superfamily      |
| Corsim1_65308_fgenesh1_pm_1_172              | superfamily | 223021 | 51  | 223 | 1.32E-06 | 51.4777 | cl33720 | PHA03247 superfamily      |
| AnFL0455_111911_CE111910_5870                | superfamily | 223021 | 9   | 236 | 2.08E-07 | 53.7889 | cl33720 | PHA03247 superfamily      |
| Anntru1_311532_CE311531_13896                | superfamily | 223021 | 9   | 201 | 9.65E-06 | 48.3961 | cl33720 | PHA03247 superfamily      |
| Pse1611_1_87933_CE87932_36050                | superfamily | 223021 | 15  | 242 | 0.004146 | 39.9217 | cl33720 | PHA03247 superfamily      |
| Sacpr1_47109_e_gw1_22_187_1                  | superfamily | 223021 | 8   | 145 | 7.51E-07 | 51.4777 | cl33720 | PHA03247 superfamily      |
| Meltu1_652512_estExt_fgenesh1_pm_C_100296    | superfamily | 223021 | 21  | 223 | 0.000722 | 42.2329 | cl33720 | PHA03247 superfamily      |
| HyFL0890_1_293355_gm1_2204_g                 | superfamily | 223021 | 33  | 248 | 0.000448 | 43.0033 | cl33720 | PHA03247 superfamily      |
| Ophun1_6569_transcript_PFH61685              | superfamily | 223021 | 120 | 252 | 0.00333  | 39.9217 | cl33720 | PHA03247 superfamily      |
| Chafu1_182160_CE182159_2477                  | superfamily | 223021 | 45  | 240 | 1.61E-05 | 48.0109 | cl33720 | PHA03247 superfamily      |
| Cenge3_540295_e_gw1_5_1528_1                 | superfamily | 223021 | 6   | 154 | 9.61E-08 | 54.5593 | cl33720 | PHA03247 superfamily      |
| Dalver1_24769_CE24768_1376                   | superfamily | 223021 | 7   | 251 | 0.001653 | 41.0773 | cl33720 | PHA03247 superfamily      |
| Cha1176438_53013_gm1_5807_g                  | superfamily | 223021 | 45  | 240 | 1.61E-05 | 48.0109 | cl33720 | PHA03247 superfamily      |
| Annmin1_341649_fgenesh1_pm_34_               | superfamily | 223021 | 2   | 232 | 0.006351 | 39.1513 | cl33720 | PHA03247 superfamily      |
| Cerbe1_10364_transcript_PPJ54732             | superfamily | 223021 | 2   | 181 | 1.63E-05 | 47.6257 | cl33720 | PHA03247 superfamily      |
| XyFL0641_1_768576_fgenesh1_pm_5_65           | superfamily | 223021 | 11  | 228 | 1.26E-05 | 48.0109 | cl33720 | PHA03247 superfamily      |
| Clamic1_59444_CE59443_1829                   | superfamily | 223021 | 46  | 287 | 0.000139 | 44.9293 | cl33720 | PHA03247 superfamily      |
| Phiglo1_111995_CE111994_469                  | superfamily | 223021 | 42  | 293 | 0.00935  | 38.7661 | cl33720 | PHA03247 superfamily      |
| TrireMAT11_1_8311_TRC1_007685_T1             | superfamily | 223021 | 45  | 226 | 3.03E-05 | 46.8553 | cl33720 | PHA03247 superfamily      |
| TrireMAT12_1_8306_TRC2_007634_T1             | superfamily | 223021 | 5   | 186 | 2.98E-05 | 46.4701 | cl33720 | PHA03247 superfamily      |
| Hyprub1_447125_gm1_4737_g                    | superfamily | 223021 | 34  | 235 | 0.001746 | 41.0773 | cl33720 | PHA03247 superfamily      |
| Chafi1_460122_MIX12583_1875_69               | superfamily | 223021 | 47  | 231 | 0.000514 | 43.0033 | cl33720 | PHA03247 superfamily      |
| Zasce1_63324_fgenesh1_pm_4_90                | superfamily | 223021 | 7   | 209 | 1.32E-06 | 51.0925 | cl33720 | PHA03247 superfamily      |
| Chagl1_600993_gm1_4196_g                     | superfamily | 223021 | 47  | 238 | 5.12E-06 | 49.5517 | cl33720 | PHA03247 superfamily      |
| Horwer1_14319_HWER_06770_R0                  | superfamily | 223021 | 48  | 227 | 0.007052 | 39.1513 | cl33720 | PHA03247 superfamily      |
| HyFL1857_1_185055_gm1_1114_g                 | superfamily | 223021 | 37  | 202 | 0.000121 | 44.9293 | cl33720 | PHA03247 superfamily      |
| Seppo1_103637_e_gw1_42_7_1                   | superfamily | 223021 | 3   | 217 | 0.001472 | 41.4625 | cl33720 | PHA03247 superfamily      |
| Thihy1_543052_MIX14763_493_91                | superfamily | 223021 | 30  | 224 | 8.62E-06 | 48.7813 | cl33720 | PHA03247 superfamily      |
| Zymbr1_9476_T139_contig604g00003T0           | superfamily | 223021 | 42  | 229 | 3.12E-05 | 46.8553 | cl33720 | PHA03247 superfamily      |
| Chame1_427882_MIX8185_3816_97                | superfamily | 223021 | 54  | 231 | 0.002015 | 41.0773 | cl33720 | PHA03247 superfamily      |
| Grocl1_7162_CMQ_7778m_01                     | superfamily | 223021 | 14  | 223 | 0.004289 | 39.9217 | cl33720 | PHA03247 superfamily      |
| NeFL0916_1_315058_CE315057_4411              | superfamily | 223021 | 37  | 294 | 0.00258  | 40.3069 | cl33720 | PHA03247 superfamily      |
| Trigu1_432746_CE432745_22045                 | superfamily | 223021 | 15  | 185 | 0.001286 | 41.0773 | cl33720 | PHA03247 superfamily      |
| Durrog2_14479_CE14478_7664                   | superfamily | 223021 | 2   | 245 | 0.000764 | 42.2329 | cl33720 | PHA03247 superfamily      |
| Melsp1_542306_CE318833_832                   | superfamily | 223021 | 31  | 195 | 0.005094 | 39.5365 | cl33720 | PHA03247 superfamily      |
| Thiap1_446666_CE446665_1818                  | superfamily | 223021 | 30  | 232 | 0.003292 | 40.3069 | cl33720 | PHA03247 superfamily      |
| Helsp1_440697_gm4_8125_g                     | superfamily | 223021 | 2   | 195 | 0.000331 | 43.3885 | cl33720 | PHA03247 superfamily      |
| Myrdu1_289103_gm1_166_g                      | superfamily | 223021 | 5   | 247 | 4.52E-06 | 49.5517 | cl33720 | PHA03247 superfamily      |
| TerNC1134_1_830775_fgenesh1_pm_9_198         | superfamily | 223021 | 6   | 197 | 0.001573 | 41.0773 | cl33720 | PHA03247 superfamily      |
| Madmy1_7026_transcript_KXX76444              | superfamily | 223021 | 65  | 278 | 5.69E-07 | 52.6333 | cl33720 | PHA03247 superfamily      |
| Leptod1_168748_CE168747_709                  | superfamily | 223021 | 25  | 233 | 0.000889 | 41.8477 | cl33720 | PHA03247 superfamily      |
| Zymar1_770827_Za111_scaffold_342_0002        | superfamily | 223021 | 3   | 219 | 6.78E-05 | 45.6997 | cl33720 | PHA03247 superfamily      |
| Zymps1_797210_Zp221_scaffold_155_00048       | superfamily | 223021 | 57  | 228 | 7.38E-07 | 51.8629 | cl33720 | PHA03247 superfamily      |
| Clafu1_195193_scf7180000130809_G10000        | superfamily | 223021 | 7   | 297 | 1E-05    | 48.3961 | cl33720 | PHA03247 superfamily      |
| Amore1_15389_gm1_1058_g                      | superfamily | 223021 | 16  | 227 | 0.003388 | 39.9217 | cl33720 | PHA03247 superfamily      |
| Atrpi1_38886_CE38885_6051                    | superfamily | 223021 | 3   | 194 | 1.59E-05 | 47.2405 | cl33720 | PHA03247 superfamily      |
| Mycgr3_103692_estExt_fgenesh1_kg_C_chr_30193 | superfamily | 223021 | 57  | 230 | 1.14E-05 | 48.0109 | cl33720 | PHA03247 superfamily      |
| Rac5018_1_16821_transcript_OQO3_2207         | superfamily | 223021 | 7   | 202 | 5.47E-05 | 46.0849 | cl33720 | PHA03247 superfamily      |
| Dotse1_71382_estExt_fgenesh1_kg_C_4_t20144   | superfamily | 223021 | 28  | 313 | 4.56E-06 | 49.5517 | cl33720 | PHA03247 superfamily      |
| NeoP8C63_1_439810_CE439809_90_43             | superfamily | 223021 | 50  | 325 | 0.000526 | 43.0033 | cl33720 | PHA03247 superfamily      |
| Lacsu1_454676_gm1_2442_g                     | superfamily | 223021 | 63  | 191 | 0.000993 | 41.4625 | cl33720 | PHA03247 superfamily      |
| Frisi1_12689_B0A55_11371                     | superfamily | 223021 | 6   | 194 | 0.005761 | 39.1513 | cl33720 | PHA03247 superfamily      |
| Xanpa2_907647_CE907646_35285                 | superfamily | 223021 | 27  | 213 | 0.005686 | 39.5365 | cl33720 | PHA03247 superfamily      |
| Pezci1_127579_CE127578_9570                  | superfamily | 223021 | 36  | 244 | 5.53E-05 | 45.6997 | cl33720 | PHA03247 superfamily      |
| Trire_Chr_116273_TrE0945C                    | superfamily | 223021 | 275 | 532 | 4.42E-05 | 47.2405 | cl33720 | PHA03247 superfamily      |
| TrireRUTC30_1_67935_e_gw1_1_20_20_1          | superfamily | 223021 | 275 | 532 | 4.42E-05 | 47.2405 | cl33720 | PHA03247 superfamily      |
| Trire2_102737_fgenesh5_pg_C_scaffold_1000370 | superfamily | 223021 | 275 | 532 | 4.42E-05 | 47.2405 | cl33720 | PHA03247 superfamily      |
| Exool1_138297_PV06_03175T0                   | superfamily | 223021 | 42  | 228 | 0.001031 | 41.8477 | cl33720 | PHA03247 superfamily      |
| Podcom1_2912_CE2911_1256                     | superfamily | 223021 | 75  | 238 | 0.006952 | 39.1513 | cl33720 | PHA03247 superfamily      |
| Asphir1_165862_gm1_5490_g                    | superfamily | 223021 | 34  | 392 | 0.008751 | 38.7661 | cl33720 | PHA03247 superfamily      |

|                                                    |             |        |     |     |          |         |         |                      |
|----------------------------------------------------|-------------|--------|-----|-----|----------|---------|---------|----------------------|
| Colfi1_275694_mRNA514                              | superfamily | 223021 | 9   | 205 | 0.007862 | 39.1513 | cl33720 | PHA03247 superfamily |
| Colsi1_972199_mrna_319                             | superfamily | 223021 | 9   | 205 | 0.006933 | 39.1513 | cl33720 | PHA03247 superfamily |
| Micmi1_36440_CE36439_7282                          | superfamily | 223021 | 4   | 209 | 3.06E-05 | 46.8553 | cl33720 | PHA03247 superfamily |
| Morcra1_214498_CE214497_3469                       | superfamily | 223021 | 5   | 230 | 0.004838 | 39.5365 | cl33720 | PHA03247 superfamily |
| Colac2_716140_fgenesh1_pm_10_19                    | superfamily | 223021 | 9   | 200 | 0.00289  | 40.3069 | cl33720 | PHA03247 superfamily |
| Mychet1_189815_e_gw1_1_308_1                       | superfamily | 223021 | 48  | 241 | 0.001868 | 41.4625 | cl33720 | PHA03247 superfamily |
| Myche1_215200_CE215199_731                         | superfamily | 223021 | 48  | 241 | 0.001868 | 41.4625 | cl33720 | PHA03247 superfamily |
| Ceraff1_167243_CE167242_2038                       | superfamily | 223021 | 18  | 288 | 7.94E-06 | 48.7813 | cl33720 | PHA03247 superfamily |
| Colgr1_9659_GLRG_02266T0                           | superfamily | 223021 | 4   | 228 | 2.18E-06 | 50.7073 | cl33720 | PHA03247 superfamily |
| NsAZ0576_1_337305_fgenesh1_pm_152_2                | superfamily | 223021 | 80  | 250 | 0.000536 | 42.6181 | cl33720 | PHA03247 superfamily |
| Disven1_83874_CE83873_9512                         | superfamily | 223021 | 3   | 146 | 0.000896 | 42.2329 | cl33720 | PHA03247 superfamily |
| Xylgra1_138919_CE138918_2302                       | superfamily | 223021 | 75  | 241 | 0.006069 | 39.1513 | cl33720 | PHA03247 superfamily |
| Leuca1_140736_CE140735_6125                        | superfamily | 223021 | 3   | 221 | 4.26E-05 | 46.0849 | cl33720 | PHA03247 superfamily |
| Umbbps1_103340_LPUS_09921T0                        | superfamily | 223021 | 6   | 172 | 0.00011  | 44.5441 | cl33720 | PHA03247 superfamily |
| Echmac1_70536_CE70535_2200                         | superfamily | 223021 | 72  | 226 | 0.001392 | 41.4625 | cl33720 | PHA03247 superfamily |
| NeFL0031_2_555829_gm1_1928_g                       | superfamily | 223021 | 14  | 242 | 0.000423 | 43.0033 | cl33720 | PHA03247 superfamily |
| Tubbor1_1098298_fgenesh1_pm_4_1_7                  | superfamily | 223021 | 15  | 261 | 0.002087 | 40.6921 | cl33720 | PHA03247 superfamily |
| Nemabo1_275432_fgenesh1_pm_16_27                   | superfamily | 223021 | 14  | 241 | 0.00914  | 38.7661 | cl33720 | PHA03247 superfamily |
| Thite2_2145927_fgenesh1_pm_chromosome_4_228        | superfamily | 223021 | 29  | 221 | 0.000203 | 44.1589 | cl33720 | PHA03247 superfamily |
| Xyllon1_225773_CE225772_6999                       | superfamily | 223021 | 9   | 246 | 0.000771 | 42.2329 | cl33720 | PHA03247 superfamily |
| Purli1_7337_transcript_OAQ89112                    | superfamily | 223021 | 61  | 216 | 0.000972 | 41.8477 | cl33720 | PHA03247 superfamily |
| Tolca1_1425_transcript_PNY25538                    | superfamily | 223021 | 80  | 242 | 0.003332 | 40.3069 | cl33720 | PHA03247 superfamily |
| Xylscr1_353604_CE353603_9632                       | superfamily | 223021 | 4   | 245 | 0.00522  | 39.5365 | cl33720 | PHA03247 superfamily |
| Tubma1_314402_fgenesh1_kg_21_2_64_Tmag110907_c6416 | superfamily | 223021 | 3   | 221 | 2.11E-05 | 46.8553 | cl33720 | PHA03247 superfamily |
| Tubin1_1_478062_e_gw1_9_135_1                      | superfamily | 223021 | 21  | 180 | 0.000295 | 43.3885 | cl33720 | PHA03247 superfamily |
| Erebi1_214840_CE214839_1284                        | superfamily | 223021 | 8   | 229 | 0.000798 | 42.2329 | cl33720 | PHA03247 superfamily |
| Neodi1_7436_AK830_g3061T0                          | superfamily | 223021 | 13  | 222 | 9.19E-06 | 48.3961 | cl33720 | PHA03247 superfamily |
| Bulin1_802888_gm1_3062_g                           | superfamily | 223021 | 11  | 208 | 0.000503 | 42.6181 | cl33720 | PHA03247 superfamily |
| Sposc1_9834_transcript_KJR80798                    | superfamily | 223021 | 87  | 303 | 1.68E-05 | 48.0109 | cl33720 | PHA03247 superfamily |
| Podcur1_26789_CE26788_985                          | superfamily | 223021 | 23  | 290 | 0.000281 | 43.7737 | cl33720 | PHA03247 superfamily |
| Neora1_44308_CE44307_9474                          | superfamily | 223021 | 1   | 200 | 8.52E-06 | 48.3961 | cl33720 | PHA03247 superfamily |
| OphPMI507_1_419987_estExt_fgene sh1_pm_C_2_t10151  | superfamily | 223021 | 97  | 319 | 4.22E-05 | 46.4701 | cl33720 | PHA03247 superfamily |
| Annsty1_412332_gm1_38_g                            | superfamily | 223021 | 2   | 231 | 0.00012  | 44.9293 | cl33720 | PHA03247 superfamily |
| Annit1_27170_CE27169_3519                          | superfamily | 223021 | 6   | 235 | 0.000557 | 42.6181 | cl33720 | PHA03247 superfamily |
| Pyrtt1_7407_PTTG_15273_1                           | superfamily | 223021 | 20  | 262 | 0.000693 | 42.6181 | cl33720 | PHA03247 superfamily |
| Humgr1_3818_Humgr2_001553_RA                       | superfamily | 223021 | 42  | 321 | 0.000832 | 42.6181 | cl33720 | PHA03247 superfamily |
| Annmae1_110697_CE110696_2560                       | superfamily | 223021 | 33  | 229 | 0.000134 | 44.5441 | cl33720 | PHA03247 superfamily |
| Bimnz1_569189_fgenesh1_pg_32_86                    | superfamily | 223021 | 8   | 221 | 6.84E-05 | 45.3145 | cl33720 | PHA03247 superfamily |
| Triiv1_186121_CE186120_3612                        | superfamily | 223021 | 19  | 233 | 6.63E-07 | 52.2481 | cl33720 | PHA03247 superfamily |
| Trila1_240648_CE240647_6326                        | superfamily | 223021 | 28  | 210 | 5.15E-06 | 49.1665 | cl33720 | PHA03247 superfamily |
| Triple1_116322_g9618_t1                            | superfamily | 223021 | 19  | 240 | 0.00022  | 44.1589 | cl33720 | PHA03247 superfamily |
| Triflo1_169804_CE169803_2226                       | superfamily | 223021 | 13  | 205 | 3.67E-07 | 52.6333 | cl33720 | PHA03247 superfamily |
| TriharM10_1_267760_CE267759_245_0                  | superfamily | 223021 | 4   | 227 | 1.16E-05 | 48.0109 | cl33720 | PHA03247 superfamily |
| TriharT22_1_18404_CE18403_3495                     | superfamily | 223021 | 4   | 227 | 8.63E-06 | 48.3961 | cl33720 | PHA03247 superfamily |
| Tricae1_34120_CE34119_2522                         | superfamily | 223021 | 28  | 205 | 3.09E-06 | 49.9369 | cl33720 | PHA03247 superfamily |
| Tricam1_139660_CE139659_2913                       | superfamily | 223021 | 18  | 227 | 2.61E-05 | 46.8553 | cl33720 | PHA03247 superfamily |
| Trice1_284663_CE284662_6734                        | superfamily | 223021 | 12  | 230 | 2.15E-05 | 47.2405 | cl33720 | PHA03247 superfamily |
| Trien1_65374_CE65373_8609                          | superfamily | 223021 | 20  | 228 | 2.31E-05 | 47.2405 | cl33720 | PHA03247 superfamily |
| Trialn1_83150_CE83149_6515                         | superfamily | 223021 | 19  | 230 | 0.000109 | 44.9293 | cl33720 | PHA03247 superfamily |
| Tripleu1_474714_MIX7386_3386_45                    | superfamily | 223021 | 19  | 229 | 0.000431 | 43.0033 | cl33720 | PHA03247 superfamily |
| Triasper1_169167_MIX9084_582_99                    | superfamily | 223021 | 32  | 232 | 0.000791 | 42.2329 | cl33720 | PHA03247 superfamily |
| Triafa1_316405_fgenesh1_pm_22_10_1                 | superfamily | 223021 | 18  | 227 | 2.61E-05 | 46.8553 | cl33720 | PHA03247 superfamily |
| Triaspe1_362366_CE362365_5158                      | superfamily | 223021 | 32  | 232 | 0.000791 | 42.2329 | cl33720 | PHA03247 superfamily |
| XylFL0662B_627247_fgenesh1_pm_3_3_10               | superfamily | 223021 | 4   | 266 | 0.00083  | 42.2329 | cl33720 | PHA03247 superfamily |
| Trive1_315310_CE315309_12223                       | superfamily | 223021 | 21  | 231 | 1.46E-06 | 51.0925 | cl33720 | PHA03247 superfamily |
| Triveli1_266865_CE266864_6384                      | superfamily | 223021 | 21  | 231 | 1.61E-06 | 50.7073 | cl33720 | PHA03247 superfamily |
| Triros1_425884_CE425883_9031                       | superfamily | 223021 | 19  | 233 | 6.63E-07 | 52.2481 | cl33720 | PHA03247 superfamily |
| Trsp14807_237073_CE237072_3983                     | superfamily | 223021 | 18  | 227 | 2.61E-05 | 46.8553 | cl33720 | PHA03247 superfamily |
| Tri5640_1_232218_CE232217_4839                     | superfamily | 223021 | 20  | 231 | 0.000321 | 43.3885 | cl33720 | PHA03247 superfamily |
| Trich5757_1_253265_CE253264_260_6                  | superfamily | 223021 | 18  | 227 | 2.61E-05 | 46.8553 | cl33720 | PHA03247 superfamily |
| TriTUC5505_1_199247_CE199246_8_885                 | superfamily | 223021 | 18  | 227 | 2.48E-05 | 46.8553 | cl33720 | PHA03247 superfamily |
| Trispi1_2_27020_fgenesh1_pm_6_20_6                 | superfamily | 223021 | 56  | 212 | 0.005934 | 39.1513 | cl33720 | PHA03247 superfamily |
| Trist1_271402_CE271401_21161                       | superfamily | 223021 | 41  | 227 | 4.74E-06 | 49.1665 | cl33720 | PHA03247 superfamily |
| Dotsy1_389026_gm1_8859_g                           | superfamily | 223021 | 24  | 234 | 0.000288 | 43.3885 | cl33720 | PHA03247 superfamily |
| Parsp1_1147235_estExt_Genewise1 Plus_C_6_t10497    | superfamily | 223021 | 8   | 156 | 7.67E-06 | 48.0109 | cl33720 | PHA03247 superfamily |
| Achstr1_304862_CE304861_2266                       | superfamily | 223021 | 48  | 274 | 0.001722 | 41.4625 | cl33720 | PHA03247 superfamily |
| Alikh1_674291_fgenesh1_pg_54_8                     | superfamily | 223021 | 69  | 195 | 6.16E-08 | 55.3297 | cl33720 | PHA03247 superfamily |
| Hypfra2_517827_gm1_1503_g                          | superfamily | 223021 | 4   | 221 | 0.004531 | 39.5365 | cl33720 | PHA03247 superfamily |
| Gaeqr1_2046_GGTG_02013T0                           | superfamily | 223021 | 113 | 523 | 6.7E-05  | 46.4701 | cl33720 | PHA03247 superfamily |
| Acrst1_1316475_fgenesh1_pg_1_698                   | superfamily | 223021 | 6   | 228 | 5.69E-05 | 45.6997 | cl33720 | PHA03247 superfamily |
| Annmor1_369100_CE369099_3753                       | superfamily | 223021 | 6   | 236 | 3.09E-06 | 49.9369 | cl33720 | PHA03247 superfamily |
| Sarstr1_220873_fgenesh1_pg_2_77                    | superfamily | 223021 | 6   | 228 | 5.69E-05 | 45.6997 | cl33720 | PHA03247 superfamily |
| Whamic1_575337_gm1_470_g                           | superfamily | 223021 | 30  | 280 | 0.001002 | 41.8477 | cl33720 | PHA03247 superfamily |
| ConPMI546_459205_CE459204_124_9                    | superfamily | 223021 | 84  | 261 | 0.000295 | 43.3885 | cl33720 | PHA03247 superfamily |
| Colgl1_7540_transcript_EQB49187                    | superfamily | 223021 | 6   | 247 | 5.58E-07 | 52.2481 | cl33720 | PHA03247 superfamily |

|                                                  |             |        |     |     |          |         |         |          |             |
|--------------------------------------------------|-------------|--------|-----|-----|----------|---------|---------|----------|-------------|
| HyFL0543_1_13076_CE13075_10139                   | superfamily | 223021 | 18  | 252 | 0.000393 | 43.0033 | cl33720 | PHA03247 | superfamily |
| Gloci1_1198112_CE1138344_3496                    | superfamily | 223021 | 32  | 227 | 7.41E-06 | 48.3961 | cl33720 | PHA03247 | superfamily |
| Ant016_1_642530_gm1_6831_g                       | superfamily | 223021 | 118 | 451 | 5.52E-07 | 53.4037 | cl33720 | PHA03247 | superfamily |
| PseVKM4520_1_2473_transcript_KFZ16882            | superfamily | 223021 | 7   | 310 | 0.009503 | 38.7661 | cl33720 | PHA03247 | superfamily |
| Triasp1_466260_gm1_5664_g                        | superfamily | 223021 | 32  | 232 | 0.000832 | 42.2329 | cl33720 | PHA03247 | superfamily |
| Wesor1_362405_gw1_6_868_1                        | superfamily | 223021 | 28  | 265 | 0.000258 | 43.7737 | cl33720 | PHA03247 | superfamily |
| Diadis1_293164_CE293163_7746                     | superfamily | 223021 | 9   | 228 | 1.38E-06 | 51.0925 | cl33720 | PHA03247 | superfamily |
| Conap1_99568_W97_07635T0                         | superfamily | 223021 | 6   | 209 | 0.003382 | 39.9217 | cl33720 | PHA03247 | superfamily |
| HypCl4A_1_99088_CE21875_4379                     | superfamily | 223021 | 6   | 242 | 0.0034   | 39.9217 | cl33720 | PHA03247 | superfamily |
| Macpha1_695309_fgenes1_pg_4_75                   | superfamily | 223021 | 2   | 152 | 0.000436 | 43.0033 | cl33720 | PHA03247 | superfamily |
| Macph1_11642_MPH_11893m_01                       | superfamily | 223021 | 2   | 150 | 0.000516 | 43.0033 | cl33720 | PHA03247 | superfamily |
| ChetPR9b_2_371283_estExt_Genemark1_C_12_t20003   | superfamily | 223021 | 2   | 231 | 0.000338 | 43.3885 | cl33720 | PHA03247 | superfamily |
| ChetPR9b_4_376936_MIX11120_1065_98               | superfamily | 223021 | 26  | 255 | 0.000342 | 43.3885 | cl33720 | PHA03247 | superfamily |
| Cocmi1_5675_gm1_5675_g                           | superfamily | 223021 | 2   | 229 | 2.48E-08 | 56.4853 | cl33720 | PHA03247 | superfamily |
| Cocsa1_119375_estExt_Genewise1_C_8_t30427        | superfamily | 223021 | 26  | 253 | 1.57E-08 | 57.2557 | cl33720 | PHA03247 | superfamily |
| Claei1_374849_estExt_Genewise1_C_350060          | superfamily | 223021 | 23  | 252 | 0.000727 | 42.2329 | cl33720 | PHA03247 | superfamily |
| Cocca1_10111_gm1_10111_g                         | superfamily | 223021 | 2   | 229 | 8.73E-05 | 45.3145 | cl33720 | PHA03247 | superfamily |
| CocheC4_1_151118_e_gw1_33_40_1                   | superfamily | 223021 | 2   | 231 | 0.000338 | 43.3885 | cl33720 | PHA03247 | superfamily |
| CocheC4_3_151118_CocheC4_1_e_gw1_33_40_1         | superfamily | 223021 | 2   | 231 | 0.000338 | 43.3885 | cl33720 | PHA03247 | superfamily |
| CocheC4_6_391188_MIX15653_1065_98                | superfamily | 223021 | 26  | 255 | 0.000342 | 43.3885 | cl33720 | PHA03247 | superfamily |
| ChetHAW225_1_457027_estExt_Genemark1_C_120436    | superfamily | 223021 | 2   | 231 | 0.000338 | 43.3885 | cl33720 | PHA03247 | superfamily |
| ChetHAW225_4_412140_MIX16495_1065_98             | superfamily | 223021 | 26  | 255 | 0.000342 | 43.3885 | cl33720 | PHA03247 | superfamily |
| ChetHm540_1_642_g5359                            | superfamily | 223021 | 26  | 255 | 0.000136 | 44.5441 | cl33720 | PHA03247 | superfamily |
| ChetPR1x412_2_386485_estExt_Genemark1_C_9_t10054 | superfamily | 223021 | 2   | 231 | 0.000338 | 43.3885 | cl33720 | PHA03247 | superfamily |
| Bismed1_648168_fgenes1_pm_8_5                    | superfamily | 223021 | 11  | 229 | 9.42E-05 | 45.3145 | cl33720 | PHA03247 | superfamily |
| Biscog1_584209_fgenes1_pm_29_28                  | superfamily | 223021 | 4   | 214 | 0.000545 | 42.6181 | cl33720 | PHA03247 | superfamily |
| Spobr1_14950_transcript_KIH88305                 | superfamily | 223021 | 89  | 305 | 6.7E-06  | 49.1665 | cl33720 | PHA03247 | superfamily |
| Tofu1_369620_CE369619_962                        | superfamily | 223021 | 3   | 249 | 1.27E-07 | 54.5593 | cl33720 | PHA03247 | superfamily |
| Triei1_161811_CE161810_9224                      | superfamily | 223021 | 53  | 213 | 0.001958 | 41.0773 | cl33720 | PHA03247 | superfamily |
| Settu3_1467594_estExt_Genemark1_C_5_t10053       | superfamily | 223021 | 24  | 226 | 1.9E-06  | 50.7073 | cl33720 | PHA03247 | superfamily |
| Settur3_547525_gm1_4691_g                        | superfamily | 223021 | 24  | 226 | 1.9E-06  | 50.7073 | cl33720 | PHA03247 | superfamily |
| Venpi1_218568_VP_s81_g8664_t1                    | superfamily | 223021 | 31  | 239 | 0.003109 | 40.3069 | cl33720 | PHA03247 | superfamily |
| VenspP74_1_553684_CE553683_3494                  | superfamily | 223021 | 13  | 253 | 4.44E-05 | 46.4701 | cl33720 | PHA03247 | superfamily |
| Cryan3_646578_CE646577_4055                      | superfamily | 223021 | 4   | 197 | 0.000629 | 42.6181 | cl33720 | PHA03247 | superfamily |
| Decga1_78859_CE78858_4609                        | superfamily | 223021 | 47  | 204 | 0.000593 | 42.6181 | cl33720 | PHA03247 | superfamily |
| Cryan3_946493_fgenes1_pg_2_95                    | superfamily | 223021 | 4   | 197 | 0.001419 | 41.4625 | cl33720 | PHA03247 | superfamily |
| ChetHm338_1_421297_estExt_Genemark1_C_130037     | superfamily | 223021 | 2   | 231 | 0.000338 | 43.3885 | cl33720 | PHA03247 | superfamily |
| Cocvi1_31414_gm1_10018_g                         | superfamily | 223021 | 2   | 229 | 7.61E-05 | 45.3145 | cl33720 | PHA03247 | superfamily |
| ChetHm338_1_423430_estExt_Genemark1_C_590014     | superfamily | 223021 | 2   | 231 | 0.000338 | 43.3885 | cl33720 | PHA03247 | superfamily |
| Lopmy1_456931_e_gw1_6_1066_1                     | superfamily | 223021 | 16  | 190 | 2.43E-06 | 50.3221 | cl33720 | PHA03247 | superfamily |
| Bysci1_200971_CE200970_3130                      | superfamily | 223021 | 4   | 232 | 1.09E-05 | 48.0109 | cl33720 | PHA03247 | superfamily |
| Psehy1_496118_gm1_849_g                          | superfamily | 223021 | 1   | 208 | 1.68E-05 | 47.6257 | cl33720 | PHA03247 | superfamily |
| Pleav1_82440_fgenes1_pm_11_116                   | superfamily | 223021 | 41  | 210 | 0.001004 | 41.8477 | cl33720 | PHA03247 | superfamily |
| Trikon1_102763_CE102762_19086                    | superfamily | 223021 | 56  | 226 | 5.16E-05 | 46.0849 | cl33720 | PHA03247 | superfamily |
| Trigil1_139312_CE139311_12060                    | superfamily | 223021 | 54  | 227 | 2.92E-05 | 46.8553 | cl33720 | PHA03247 | superfamily |
| Trilo3_1164775_CE164775_13147                    | superfamily | 223021 | 108 | 277 | 8.77E-06 | 48.7813 | cl33720 | PHA03247 | superfamily |
| Trior1_300172_CE300171_6531                      | superfamily | 223021 | 108 | 277 | 8.77E-06 | 48.7813 | cl33720 | PHA03247 | superfamily |
| Trici4_1116812_e_gw1_5_319_1                     | superfamily | 223021 | 56  | 226 | 4.96E-07 | 52.6333 | cl33720 | PHA03247 | superfamily |
| Trilon1_477812_e_gw1_288_4_1                     | superfamily | 223021 | 57  | 226 | 8.59E-06 | 48.3961 | cl33720 | PHA03247 | superfamily |
| Tripa1_5584_rna1595                              | superfamily | 223021 | 57  | 230 | 2.2E-05  | 47.2405 | cl33720 | PHA03247 | superfamily |
| Trigra1_426073_gm1_1392_g                        | superfamily | 223021 | 94  | 273 | 2.94E-07 | 53.4037 | cl33720 | PHA03247 | superfamily |
| Stobe1_71457_gm1_1608_g                          | superfamily | 223021 | 2   | 248 | 3.83E-06 | 49.9369 | cl33720 | PHA03247 | superfamily |
| Triat1_10205_CE10204_6651                        | superfamily | 223021 | 57  | 226 | 2.6E-06  | 50.3221 | cl33720 | PHA03247 | superfamily |
| Venin1_23636_atg11275_t1                         | superfamily | 223021 | 34  | 289 | 7.65E-05 | 45.6997 | cl33720 | PHA03247 | superfamily |
| Trisin1_279331_CE279330_2857                     | superfamily | 223021 | 56  | 227 | 2.04E-05 | 47.2405 | cl33720 | PHA03247 | superfamily |
| Daralp1_363826_CE363825_19304                    | superfamily | 223021 | 41  | 269 | 0.00014  | 44.5441 | cl33720 | PHA03247 | superfamily |
| FvanT343_1_375750_fgenes1_pm_6_131               | superfamily | 223021 | 8   | 203 | 0.000105 | 44.9293 | cl33720 | PHA03247 | superfamily |
| EurotioJF033F_1_670307_MIX82_2103_29             | superfamily | 165527 | 3   | 172 | 0.000216 | 43.5636 | cl29788 | PHA03269 | superfamily |
| EurotioJF034F_1_423868_fgenes1_pg_16_120         | superfamily | 165527 | 3   | 172 | 0.000216 | 43.5636 | cl29788 | PHA03269 | superfamily |
| Crypto1_517308_gm1_3612_g                        | superfamily | 223039 | 15  | 216 | 0.000503 | 42.4657 | cl33723 | PHA03307 | superfamily |
| XylFL0016_258239_CE258238_2631                   | superfamily | 223039 | 53  | 219 | 0.004448 | 39.7693 | cl33723 | PHA03307 | superfamily |
| Rosne1_3830_transcript_GAP89218                  | superfamily | 223039 | 37  | 240 | 0.00097  | 41.6953 | cl33723 | PHA03307 | superfamily |
| Xylbam139988_1_160222_CE160221_8509              | superfamily | 223039 | 18  | 245 | 4.23E-05 | 46.3177 | cl33723 | PHA03307 | superfamily |
| Ophpic1_487_rna486                               | superfamily | 223039 | 63  | 245 | 0.002995 | 40.1545 | cl33723 | PHA03307 | superfamily |
| Altso1_121502_ASLECTG_729_jigsaw_mRNA_21         | superfamily | 223039 | 48  | 249 | 0.000713 | 42.0805 | cl33723 | PHA03307 | superfamily |
| Alttom1_114441_ATMCTG_118_jigsaw_mRNA_1          | superfamily | 223039 | 48  | 249 | 1.9E-05  | 47.4733 | cl33723 | PHA03307 | superfamily |

|                                             |             |        |     |      |          |         |         |                      |
|---------------------------------------------|-------------|--------|-----|------|----------|---------|---------|----------------------|
| Altca1_114494_ACSCTG_929_jigsaw_mRNA_5      | superfamily | 223039 | 49  | 250  | 0.000115 | 44.7769 | cl33723 | PHA03307 superfamily |
| Altcar1_119785_ACMCTG_914_jigsaw_mRNA_1     | superfamily | 223039 | 48  | 249  | 0.000152 | 44.3917 | cl33723 | PHA03307 superfamily |
| Altma1_118665_AMRCTG_755_jigsaw_mRNA_1      | superfamily | 223039 | 48  | 249  | 0.00011  | 44.7769 | cl33723 | PHA03307 superfamily |
| Altda1_114626_ADCCTG_407_jigsaw_mRNA_5      | superfamily | 223039 | 48  | 249  | 0.000193 | 44.0065 | cl33723 | PHA03307 superfamily |
| Zoprh1_113072_CE113071_5868                 | superfamily | 223039 | 42  | 246  | 0.000143 | 44.3917 | cl33723 | PHA03307 superfamily |
| Lopnu1_506561_e_gw1_47_193_1                | superfamily | 223065 | 48  | 251  | 0.000592 | 42.3616 | cl33729 | PHA03378 superfamily |
| Bisma1_419188_fgenes1_pm_47_3               | superfamily | 223065 | 7   | 145  | 2.92E-05 | 46.5988 | cl33729 | PHA03378 superfamily |
| HyNC1633_2_628896_fgenes1_pm_6_3            | superfamily | 223065 | 9   | 271  | 7.71E-05 | 45.058  | cl33729 | PHA03378 superfamily |
| Porpun1_277924_CE277923_7712                | superfamily | 223065 | 105 | 253  | 0.006126 | 39.28   | cl33729 | PHA03378 superfamily |
| Tolin1_197073_TINF07095_mRNA_1              | superfamily | 223065 | 200 | 415  | 2.41E-05 | 47.3692 | cl33729 | PHA03378 superfamily |
| Cerzm1_29152_gw1_5_946_1                    | superfamily | 223065 | 1   | 181  | 0.000674 | 42.3616 | cl33729 | PHA03378 superfamily |
| DalloAZ0526_2_221055_CE221054_16448         | superfamily | 223065 | 4   | 236  | 0.001372 | 41.206  | cl33729 | PHA03378 superfamily |
| Coclu2_56229_fgenes1_pm_26_34               | superfamily | 223065 | 27  | 265  | 0.000275 | 43.5172 | cl33729 | PHA03378 superfamily |
| Acrvag1_525712_CE525711_1567                | superfamily | 223065 | 63  | 254  | 5.87E-06 | 48.91   | cl33729 | PHA03378 superfamily |
| Verlo1_7189_transcript_CRK21276             | superfamily | 223492 | 444 | 987  | 3.39E-70 | 243.768 | cl43137 | PhrB superfamily     |
| Capcor1_350_A1O1_00352T0                    | superfamily | 215130 | 7   | 87   | 0.000222 | 43.5392 | cl33436 | PLN02217 superfamily |
| Exode1_6083_HMPREF1120_05878T0              | superfamily | 215130 | 50  | 117  | 0.000745 | 41.9984 | cl33436 | PLN02217 superfamily |
| Aspran1_153856_gm1_8692_g                   | superfamily | 215130 | 72  | 163  | 0.00042  | 43.154  | cl33436 | PLN02217 superfamily |
| Aspchr1_491872_gm1_4862_g                   | superfamily | 215130 | 72  | 153  | 0.00375  | 39.6872 | cl33436 | PLN02217 superfamily |
| Clasph1_3210_CSPH_06797_R0                  | superfamily | 215186 | 429 | 972  | 0        | 779.593 | cl33465 | PLN02327 superfamily |
| Didma1_15877_g1981_t1                       | superfamily | 215186 | 490 | 1035 | 0        | 830.824 | cl33465 | PLN02327 superfamily |
| Stely1_6668_TW65_97109T0                    | superfamily | 215186 | 469 | 1012 | 0        | 824.661 | cl33465 | PLN02327 superfamily |
| Aurpu_var_sub1_3702_gm1_3702_g              | superfamily | 178748 | 44  | 195  | 0.00013  | 44.1467 | cl25752 | PLN03209 superfamily |
| Capfu1_223502_MIX1467_177_100               | superfamily | 235906 | 5   | 238  | 0.000154 | 44.07   | cl35530 | PRK07003 superfamily |
| Hypcro1_445098_gm1_5606_g                   | superfamily | 236090 | 40  | 212  | 0.000965 | 41.5101 | cl35613 | PRK07764 superfamily |
| Apope1_198129_CE198128_3691                 | superfamily | 236090 | 61  | 236  | 0.002087 | 40.7397 | cl35613 | PRK07764 superfamily |
| Podap1_30093_CE30092_701                    | superfamily | 236090 | 140 | 271  | 0.001845 | 41.1249 | cl35613 | PRK07764 superfamily |
| ColoR110_1_90609_estExt_Genewis             | superfamily | 236090 | 48  | 241  | 0.000254 | 43.8213 | cl35613 | PRK07764 superfamily |
| e1Plus_C_290088                             | superfamily | 236090 | 5   | 203  | 5.08E-06 | 48.8289 | cl35613 | PRK07764 superfamily |
| Roster1_151755_CE151754_7395                | superfamily | 236090 | 5   | 203  | 5.08E-06 | 48.8289 | cl35613 | PRK07764 superfamily |
| HybrubER1909_1_254078_gm1_1626_g            | superfamily | 236138 | 74  | 220  | 1.05E-05 | 47.9382 | cl35634 | PRK07994 superfamily |
| Cadosp1_561021_estExt_Genemark4_C_3_110189  | superfamily | 236333 | 91  | 266  | 0.004533 | 39.3066 | cl35739 | PRK08691 superfamily |
| Morste1_487689_CE487688_2475                | superfamily | 236333 | 4   | 174  | 0.000925 | 41.6178 | cl35739 | PRK08691 superfamily |
| Morpal1_319283_CE319282_2402                | superfamily | 236333 | 4   | 174  | 0.000925 | 41.6178 | cl35739 | PRK08691 superfamily |
| FvanT23_1_394662_fgenes1_pm_1_39_7          | superfamily | 236669 | 14  | 188  | 0.001109 | 41.6091 | cl35903 | PRK10263 superfamily |
| FvanT36_1_297991_fgenes1_pm_2_409           | superfamily | 236669 | 14  | 188  | 0.001109 | 41.6091 | cl35903 | PRK10263 superfamily |
| Aulhe2_421138_gm1_5273_g                    | superfamily | 236669 | 24  | 162  | 0.000416 | 42.7647 | cl35903 | PRK10263 superfamily |
| Trieff1_474649_CE474648_7098                | superfamily | 236669 | 113 | 224  | 0.000269 | 43.5351 | cl35903 | PRK10263 superfamily |
| Leppa1_390814_fgenes1_pg_69_21              | superfamily | 236669 | 7   | 246  | 0.000711 | 41.9943 | cl35903 | PRK10263 superfamily |
| HyFL1284_2_228178_CE228177_111_30           | superfamily | 236669 | 38  | 193  | 4.3E-06  | 49.3131 | cl35903 | PRK10263 superfamily |
| Lophiu1_113392_CE113391_4005                | superfamily | 236669 | 46  | 253  | 1.69E-05 | 47.3871 | cl35903 | PRK10263 superfamily |
| Aoar1_93849_CE93848_9637                    | superfamily | 236669 | 41  | 285  | 0.002409 | 40.8387 | cl35903 | PRK10263 superfamily |
| Patat1_987049_fgenes1_pg_14_117             | superfamily | 236669 | 7   | 168  | 0.000588 | 42.3795 | cl35903 | PRK10263 superfamily |
| Pcapi1_206177_CE206176_24194                | superfamily | 236669 | 47  | 165  | 5.86E-05 | 45.8463 | cl35903 | PRK10263 superfamily |
| Phycap1_351286_gm1_3145_g                   | superfamily | 236669 | 47  | 165  | 5.86E-05 | 45.8463 | cl35903 | PRK10263 superfamily |
| Pc1t129764_489400_gm1_7490_g                | superfamily | 236669 | 26  | 148  | 0.000464 | 42.7647 | cl35903 | PRK10263 superfamily |
| Phcitr1_306714_gm1_1049_g                   | superfamily | 236669 | 26  | 148  | 0.000464 | 42.7647 | cl35903 | PRK10263 superfamily |
| Phcapit2_543119_gm1_3153_g                  | superfamily | 236669 | 47  | 165  | 5.86E-05 | 45.8463 | cl35903 | PRK10263 superfamily |
| Phcap1_168250_CE168249_9134                 | superfamily | 236669 | 47  | 165  | 6.17E-05 | 45.8463 | cl35903 | PRK10263 superfamily |
| Phycapi2_219400_CE219399_1857               | superfamily | 236669 | 47  | 165  | 0.00013  | 44.6907 | cl35903 | PRK10263 superfamily |
| Phcapi1_291824_estExt_fgenes1_pm_C_3_110407 | superfamily | 236669 | 33  | 151  | 4.95E-05 | 45.8463 | cl35903 | PRK10263 superfamily |
| DalEC12_1_17712_gm1_320_g                   | superfamily | 236669 | 34  | 232  | 1.37E-05 | 47.7723 | cl35903 | PRK10263 superfamily |
| Dales1_5996_CE5995_4861                     | superfamily | 236669 | 38  | 237  | 6.58E-06 | 48.5427 | cl35903 | PRK10263 superfamily |
| Hypru1_24467_CE24466_13293                  | superfamily | 236669 | 120 | 217  | 0.003273 | 40.0683 | cl35903 | PRK10263 superfamily |
| FusoxFo47_12978_rna_gnl_WGS_AF              | superfamily | 236669 | 20  | 219  | 3.57E-05 | 46.2315 | cl35903 | PRK10263 superfamily |
| MM_mrna_FOZG_05187T0                        | superfamily | 236669 | 20  | 219  | 3.57E-05 | 46.2315 | cl35903 | PRK10263 superfamily |
| Fusoxrad1_994_rna_gnl_WGS_AGN               | superfamily | 236669 | 20  | 219  | 3.57E-05 | 46.2315 | cl35903 | PRK10263 superfamily |
| B_mrna_FOCG_00688T0                         | superfamily | 236669 | 20  | 219  | 3.57E-05 | 46.2315 | cl35903 | PRK10263 superfamily |
| FusoxFo47_2_289919_MIX7086_701_98           | superfamily | 236669 | 20  | 219  | 3.57E-05 | 46.2315 | cl35903 | PRK10263 superfamily |
| Fox26365_1_347348_fgenes1_pm_Chr_508_59     | superfamily | 236669 | 3   | 184  | 0.000577 | 42.3795 | cl35903 | PRK10263 superfamily |
| Fusoxlyc1_10350_rna_gnl_WGS_AG              | superfamily | 236669 | 20  | 219  | 3.57E-05 | 46.2315 | cl35903 | PRK10263 superfamily |
| BH_mrna_FOWG_02698T0                        | superfamily | 236669 | 23  | 235  | 6.07E-05 | 45.4611 | cl35903 | PRK10263 superfamily |
| Lepor2_77718_CE77717_586                    | superfamily | 236669 | 28  | 199  | 2.22E-05 | 47.0019 | cl35903 | PRK10263 superfamily |
| CadmalM221_1_286_IFR05_003681_1             | superfamily | 236669 | 28  | 199  | 2.22E-05 | 47.0019 | cl35903 | PRK10263 superfamily |
| Wilmi1_591550_estExt_Genewis1_C_2280035     | superfamily | 236669 | 100 | 264  | 0.002299 | 40.4535 | cl35903 | PRK10263 superfamily |
| Colca1_113980_CE113979_2077                 | superfamily | 236669 | 18  | 164  | 1.11E-07 | 54.3207 | cl35903 | PRK10263 superfamily |
| Gloac1_1357794_gm1_12903_g                  | superfamily | 236669 | 1   | 152  | 0.009327 | 38.5275 | cl35903 | PRK10263 superfamily |
| Coler1_617967_fgenes1_pg_37_59              | superfamily | 236669 | 1   | 145  | 0.00356  | 40.0683 | cl35903 | PRK10263 superfamily |
| Colso1_241763_CE241762_1348                 | superfamily | 236669 | 4   | 172  | 2.87E-05 | 46.6167 | cl35903 | PRK10263 superfamily |
| Colsu1_680404_gm1_4911_g                    | superfamily | 236669 | 1   | 145  | 0.004542 | 39.6831 | cl35903 | PRK10263 superfamily |
| Colsub1_7241_transcript_KDN70858            | superfamily | 236669 | 1   | 145  | 0.004542 | 39.6831 | cl35903 | PRK10263 superfamily |
| Colzo1_245175_CE245174_1392                 | superfamily | 236669 | 18  | 159  | 1.91E-07 | 53.5503 | cl35903 | PRK10263 superfamily |
| Colfa1_78916_CE78915_1747                   | superfamily | 236669 | 9   | 140  | 0.000498 | 42.3795 | cl35903 | PRK10263 superfamily |

|          |                                              |             |        |     |     |          |         |         |                             |
|----------|----------------------------------------------|-------------|--------|-----|-----|----------|---------|---------|-----------------------------|
|          | Color1_1128_CORC01_10899T0                   | superfamily | 236669 | 9   | 210 | 3.61E-06 | 49.6983 | cl35903 | PRK10263 superfamily        |
|          | Anttom1_387379_fgenes1_pm_3_361              | superfamily | 236669 | 9   | 159 | 0.007946 | 38.9127 | cl35903 | PRK10263 superfamily        |
|          | Colch1_8855_mrna_4388                        | superfamily | 236669 | 9   | 145 | 1.41E-05 | 47.7723 | cl35903 | PRK10263 superfamily        |
|          | Lompr1_6758_transcript_PKS10158              | superfamily | 236669 | 167 | 294 | 0.000411 | 43.1499 | cl35903 | PRK10263 superfamily        |
|          | LobpufA1_1160656_MIX37499_1261_30            | superfamily | 236669 | 5   | 170 | 0.001339 | 41.2239 | cl35903 | PRK10263 superfamily        |
|          | LobpufSp1_155974_CE155973_1823_5             | superfamily | 236669 | 5   | 170 | 0.00124  | 41.2239 | cl35903 | PRK10263 superfamily        |
|          | LobpufSw1_2886809_CE2886808_42_086           | superfamily | 236669 | 5   | 170 | 0.001339 | 41.2239 | cl35903 | PRK10263 superfamily        |
|          | Colto1_266_CT0861_07648T0                    | superfamily | 236669 | 6   | 144 | 2.2E-06  | 50.4687 | cl35903 | PRK10263 superfamily        |
|          | Coltof1_155909_mrna_2160                     | superfamily | 236669 | 6   | 144 | 2.2E-06  | 50.4687 | cl35903 | PRK10263 superfamily        |
|          | Colin1_7920_mrna_7920                        | superfamily | 236669 | 6   | 138 | 5.38E-08 | 55.4763 | cl35903 | PRK10263 superfamily        |
|          | Tripare1_302794_CE302793_4242                | superfamily | 236669 | 38  | 212 | 0.000214 | 43.9203 | cl35903 | PRK10263 superfamily        |
|          | Trihar1_55701_CE55700_44869                  | superfamily | 236669 | 4   | 185 | 5.17E-05 | 45.4611 | cl35903 | PRK10263 superfamily        |
|          | Trica1_287933_CE287932_9112                  | superfamily | 236669 | 35  | 238 | 0.000559 | 42.3795 | cl35903 | PRK10263 superfamily        |
|          | Triag1_384580_CE384579_6480                  | superfamily | 236669 | 38  | 227 | 0.000121 | 44.6907 | cl35903 | PRK10263 superfamily        |
|          | llyrob1_525858_gm1_962_g                     | superfamily | 236669 | 6   | 193 | 7.66E-05 | 45.4611 | cl35903 | PRK10263 superfamily        |
|          | Tribrev1_162712_CE162711_4200                | superfamily | 236669 | 26  | 211 | 0.000134 | 44.6907 | cl35903 | PRK10263 superfamily        |
|          | Tribre1_124724_g10182_t1                     | superfamily | 236669 | 26  | 211 | 0.000134 | 44.6907 | cl35903 | PRK10263 superfamily        |
|          | Alta1_122362_ALMCTG_441_jigsaw mRNA 5        | superfamily | 236669 | 20  | 306 | 8.84E-05 | 45.0759 | cl35903 | PRK10263 superfamily        |
|          | Cloaq1_626910_fgenes1_pm_128_2_1             | superfamily | 236669 | 18  | 221 | 8.55E-06 | 48.5427 | cl35903 | PRK10263 superfamily        |
|          | Stano2_6175_SNOG_12917_3                     | superfamily | 236669 | 72  | 269 | 0.000193 | 43.9203 | cl35903 | PRK10263 superfamily        |
|          | Stely1_6668_TW65_97109T0                     | superfamily | 236669 | 19  | 304 | 7.55E-06 | 50.0835 | cl35903 | PRK10263 superfamily        |
|          | Dallo1_184715_CE184714_47817                 | superfamily | 236669 | 5   | 157 | 0.000707 | 41.9943 | cl35903 | PRK10263 superfamily        |
|          | Delco1_260495_CE260494_3054                  | superfamily | 236669 | 104 | 252 | 0.000783 | 41.9943 | cl35903 | PRK10263 superfamily        |
|          | Glonio1_91381_CE91380_6007                   | superfamily | 236669 | 18  | 219 | 4.19E-07 | 52.7799 | cl35903 | PRK10263 superfamily        |
|          | Photr1_434446_estExt_Genewise1_C580035       | superfamily | 236669 | 34  | 273 | 0.002693 | 40.4535 | cl35903 | PRK10263 superfamily        |
|          | Paront1_56984_gm4_492_g                      | superfamily | 236669 | 43  | 220 | 0.001142 | 41.6091 | cl35903 | PRK10263 superfamily        |
|          | Rhiund1_813034_gm1_15180_g                   | superfamily | 236669 | 41  | 234 | 0.001095 | 41.6091 | cl35903 | PRK10263 superfamily        |
|          | Polfu1_566286_gm1_8335_g                     | superfamily | 236669 | 8   | 178 | 0.008836 | 38.5275 | cl35903 | PRK10263 superfamily        |
|          | Trifla1_250364_CE250363_3355                 | superfamily | 236669 | 14  | 226 | 0.000185 | 43.9203 | cl35903 | PRK10263 superfamily        |
|          | Veren1_539327_fgenes1_pg_3_78                | superfamily | 236669 | 19  | 190 | 0.001031 | 41.6091 | cl35903 | PRK10263 superfamily        |
|          | HyFL1150_1_461858_gm1_693_g                  | superfamily | 236669 | 1   | 223 | 0.001662 | 40.8387 | cl35903 | PRK10263 superfamily        |
|          | Fvant77_1_381303_fgenes1_pm_1_7_152          | superfamily | 236669 | 14  | 188 | 0.001109 | 41.6091 | cl35903 | PRK10263 superfamily        |
|          | Fvant78_1_267704_fgenes1_pm_3_3_40           | superfamily | 236669 | 14  | 188 | 0.001109 | 41.6091 | cl35903 | PRK10263 superfamily        |
|          | Fvant95_1_10819_CE10818_4168                 | superfamily | 236669 | 32  | 206 | 0.001304 | 41.2239 | cl35903 | PRK10263 superfamily        |
|          | FusspF11_1_917740_gm1_4476_g                 | superfamily | 236669 | 32  | 206 | 0.001304 | 41.2239 | cl35903 | PRK10263 superfamily        |
|          | Necha2_79226_fgenes1_pg_sca_3_chr4_2_0000627 | superfamily | 236669 | 14  | 188 | 0.001109 | 41.6091 | cl35903 | PRK10263 superfamily        |
|          | Fvant110_1_519667_fgenes1_pm_10_326          | superfamily | 236669 | 14  | 188 | 0.001109 | 41.6091 | cl35903 | PRK10263 superfamily        |
|          | Fvant126_1_435157_fgenes1_pm_32_98           | superfamily | 236669 | 14  | 188 | 0.001109 | 41.6091 | cl35903 | PRK10263 superfamily        |
|          | Fvant159_1_474576_fgenes1_pm_19_106          | superfamily | 236669 | 25  | 130 | 0.002111 | 40.4535 | cl35903 | PRK10263 superfamily        |
|          | Fusva1_408761_e_gw1_23_340_1                 | superfamily | 236669 | 14  | 188 | 0.001109 | 41.6091 | cl35903 | PRK10263 superfamily        |
|          | Fusvan1_527675_fgenes1_pm_2_65_1             | superfamily | 236669 | 14  | 188 | 0.001109 | 41.6091 | cl35903 | PRK10263 superfamily        |
|          | Fvant200_1_291867_fgenes1_pm_13_88           | superfamily | 236669 | 14  | 188 | 0.001109 | 41.6091 | cl35903 | PRK10263 superfamily        |
|          | Fvant219_1_327855_fgenes1_pm_28_87           | superfamily | 236669 | 14  | 188 | 0.001109 | 41.6091 | cl35903 | PRK10263 superfamily        |
|          | Fvant299_1_349400_fgenes1_pg_1_7_119         | superfamily | 236669 | 14  | 188 | 0.001109 | 41.6091 | cl35903 | PRK10263 superfamily        |
|          | Fvant31_1_365445_gm1_7552_g                  | superfamily | 236669 | 32  | 206 | 0.001304 | 41.2239 | cl35903 | PRK10263 superfamily        |
|          | Fvant33_1_28398_CE28397_5619                 | superfamily | 236669 | 32  | 206 | 0.001304 | 41.2239 | cl35903 | PRK10263 superfamily        |
|          | Fusso1_460384_fgenes1_pg_3_681               | superfamily | 236669 | 10  | 188 | 0.001053 | 41.6091 | cl35903 | PRK10263 superfamily        |
|          | Fusmo1_294118_gm1_9940_g                     | superfamily | 236669 | 16  | 162 | 0.006927 | 38.9127 | cl35903 | PRK10263 superfamily        |
|          | Rhesp1_267548_CE267547_14851                 | superfamily | 236797 | 26  | 144 | 0.00824  | 38.1224 | cl35972 | PRK10927 superfamily        |
|          | Bombom1_494078_e_gw1_4_1521_1                | superfamily | 236797 | 129 | 254 | 0.000889 | 41.204  | cl35972 | PRK10927 superfamily        |
|          | Dallo1_20247_CE20246_10827                   | superfamily | 237057 | 58  | 251 | 0.000144 | 44.0963 | cl36108 | PRK12323 superfamily        |
|          | Dalba1_95645_CE95644_5177                    | superfamily | 237057 | 56  | 253 | 1.04E-05 | 47.9483 | cl36108 | PRK12323 superfamily        |
|          | Tricap1_409356_fgenes1_pm_3_1                | superfamily | 237057 | 249 | 415 | 0.000721 | 42.5555 | cl36108 | PRK12323 superfamily        |
|          | Thiap1_446666_CE446665_1818                  | superfamily | 184287 | 117 | 195 | 0.000542 | 42.8102 | cl42934 | PRK13735 superfamily        |
|          | Achstr1_304862_CE304861_2266                 | superfamily | 237865 | 181 | 297 | 0.000633 | 42.394  | cl36447 | PRK14951 superfamily        |
|          | Ascsa1_4923_4923_t                           | superfamily | 237874 | 52  | 160 | 0.004563 | 39.3735 | cl36455 | PRK14971 superfamily        |
|          | Darbet1_37294_CE37293_5697                   | superfamily | 185594 | 100 | 227 | 0.001026 | 41.9843 | cl33180 | PTZ00395 superfamily        |
|          | Photr1_118101_CE118100_165                   | superfamily | 185628 | 26  | 106 | 0.002816 | 40.4434 | cl33186 | PTZ00449 superfamily        |
|          | Plecto1_682281_gm1_5247_g                    | superfamily | 185628 | 35  | 206 | 1.12E-05 | 47.7622 | cl33186 | PTZ00449 superfamily        |
|          | XylFL2044_787654_gm1_12274_g                 | superfamily | 185628 | 129 | 245 | 0.007203 | 38.9026 | cl33186 | PTZ00449 superfamily        |
|          | Trinov1_760538_fgenes1_pm_7_19               | superfamily | 185628 | 3   | 239 | 0.00085  | 41.9842 | cl33186 | PTZ00449 superfamily        |
|          | Aspnut1_176459_CE176458_7976                 | superfamily | 227709 | 2   | 154 | 0.005851 | 39.4891 | cl34999 | ROM1 superfamily            |
|          | Trigu1_3403_transcript_OPB42291              | superfamily | 227709 | 2   | 253 | 0.000116 | 44.8819 | cl34999 | ROM1 superfamily            |
|          | Triha1_81433_e_gw1_4_2099_1                  | superfamily | 227709 | 2   | 253 | 2.67E-06 | 49.8895 | cl34999 | ROM1 superfamily            |
|          | Penatra1_75682_gm1_9769_g                    | superfamily | 445932 | 288 | 371 | 0.000123 | 43.4338 | cl02808 | RT like superfamily         |
| Pez-VosA | Byssp1_5217_PVAR5_7753                       | superfamily | 436461 | 569 | 609 | 0.002207 | 36.5446 | cl39730 | CSN7a_helixI superfamily    |
|          | Uncre1_5118_URET_05255                       | superfamily | 412063 | 405 | 491 | 0.008694 | 37.6974 | cl41678 | cubilin_NTD superfamily     |
|          | Crypto1_455589_fgenes1_pg_11_39_9            | superfamily | 430824 | 341 | 513 | 0.002197 | 40.5782 | cl40852 | CytochromB561_N superfamily |
|          | CadmalM34_1_8343_IFR04_000561_1              | superfamily | 455861 | 261 | 451 | 0.002426 | 40.5792 | cl42516 | dnaA superfamily            |
|          | Aspfalc1_41868_CE41867_244                   | superfamily | 455861 | 113 | 248 | 0.001485 | 39.4236 | cl42516 | dnaA superfamily            |
|          | Aspneoc1_179146_gm1_3773_g                   | superfamily | 455861 | 264 | 467 | 0.001191 | 41.3496 | cl42516 | dnaA superfamily            |

|                                         |             |        |     |     |          |         |         |                             |
|-----------------------------------------|-------------|--------|-----|-----|----------|---------|---------|-----------------------------|
| Aspneoi1_108394_CE108393_7219           | superfamily | 455861 | 262 | 428 | 0.002229 | 40.194  | cl42516 | dnaA superfamily            |
| Aspsep1_353862_gm1_519_g                | superfamily | 455861 | 288 | 469 | 0.003238 | 39.8088 | cl42516 | dnaA superfamily            |
| Tubae1_7570_GSTUAT00000570001           | superfamily | 455861 | 206 | 427 | 9.63E-07 | 51.3648 | cl42516 | dnaA superfamily            |
| Morsem1_780854_gm1_1210_g               | superfamily | 455861 | 219 | 404 | 1.37E-05 | 47.5128 | cl42516 | dnaA superfamily            |
| Mordis1_541789_CE541788_18590           | superfamily | 455861 | 219 | 404 | 1.37E-05 | 47.5128 | cl42516 | dnaA superfamily            |
| Mordun1_680394_gm1_2291_g               | superfamily | 455861 | 219 | 404 | 1.85E-06 | 50.5944 | cl42516 | dnaA superfamily            |
| Morgal1_724471_gm1_10013_g              | superfamily | 455861 | 219 | 404 | 1.41E-05 | 47.5128 | cl42516 | dnaA superfamily            |
| Morkaki1_926045_gm1_2820_g              | superfamily | 455861 | 219 | 404 | 1.37E-05 | 47.5128 | cl42516 | dnaA superfamily            |
| Morcr1_717040_e_gw1_7_985_1             | superfamily | 455861 | 214 | 398 | 2.38E-06 | 50.2092 | cl42516 | dnaA superfamily            |
| Aspamy1_4984_CE4983_790                 | superfamily | 436069 | 271 | 429 | 0.004042 | 39.5148 | cl39316 | DUF5585 superfamily         |
| Aspspe1_1_114624_CE114623_1257          | superfamily | 436069 | 317 | 428 | 0.003958 | 39.5148 | cl39316 | DUF5585 superfamily         |
| Podcur1_422056_gm1_6359_g               | superfamily | 436069 | 297 | 384 | 0.001409 | 40.6704 | cl39316 | DUF5585 superfamily         |
| Uncre1_5118_URET_05255                  | specific    | 213391 | 539 | 863 | 1.5E-25  | 110.612 | cd12148 | fungai_TF_MHR               |
| Myrdu1_266973_fgenes1_pg_4_218          | superfamily | 406402 | 346 | 447 | 0.008803 | 37.9869 | cl25765 | G_path_suppress superfamily |
| Bisme1_471275_CE471274_29115            | superfamily | 282904 | 298 | 475 | 0.001436 | 41.4404 | cl37540 | Herpes_BLLF1 superfamily    |
| Bismed1_226541_CE226540_3449            | superfamily | 282904 | 298 | 475 | 0.00054  | 42.596  | cl37540 | Herpes_BLLF1 superfamily    |
| Biscog1_585681_fgenes1_pm_56_2_4        | superfamily | 282904 | 295 | 522 | 0.001376 | 41.4404 | cl37540 | Herpes_BLLF1 superfamily    |
| CtCBS203_1_560099_CE560098_44_46        | superfamily | 282904 | 296 | 473 | 0.001681 | 41.0552 | cl37540 | Herpes_BLLF1 superfamily    |
| Bisma1_407090_gm1_3391_g                | superfamily | 282904 | 309 | 472 | 0.000965 | 41.8256 | cl37540 | Herpes_BLLF1 superfamily    |
| XyFL1272_2_169956_CE169955_992_6        | superfamily | 282904 | 276 | 426 | 0.000413 | 42.9812 | cl37540 | Herpes_BLLF1 superfamily    |
| Jumvir1_84304_CE84303_4923              | superfamily | 282904 | 301 | 511 | 3.18E-05 | 46.8332 | cl37540 | Herpes_BLLF1 superfamily    |
| Lolmi1_137768_CE137767_1045             | superfamily | 282904 | 250 | 481 | 0.001439 | 41.4404 | cl37540 | Herpes_BLLF1 superfamily    |
| Neo1551_1_464410_e_gw1_13_392_1         | superfamily | 282904 | 283 | 445 | 0.006451 | 39.1292 | cl37540 | Herpes_BLLF1 superfamily    |
| Magor1_9726_rna_MGG_00617T0             | superfamily | 273733 | 322 | 458 | 0.002461 | 40.185  | cl25888 | hnRNP-L_PTB superfamily     |
| Aspfloc1_75202_CE75201_445              | superfamily | 312941 | 260 | 389 | 9.32E-05 | 44.614  | cl26621 | Med15 superfamily           |
| Asptsu1_327914_CE327913_3092            | superfamily | 312941 | 277 | 465 | 0.009674 | 38.4508 | cl26621 | Med15 superfamily           |
| Aspthe1_205577_CE205576_789             | superfamily | 312941 | 268 | 465 | 0.001203 | 41.5324 | cl26621 | Med15 superfamily           |
| Aspuda1_6286_AUD_2434                   | superfamily | 312941 | 266 | 458 | 0.00222  | 40.3768 | cl26621 | Med15 superfamily           |
| Penant1_9045_PENANT_c005G0272_7T0       | superfamily | 312941 | 244 | 395 | 0.000655 | 41.9176 | cl26621 | Med15 superfamily           |
| Aspell1_321357_e_gw1_44_139_1           | superfamily | 312941 | 240 | 433 | 0.005827 | 38.836  | cl26621 | Med15 superfamily           |
| Asppust1_241990_gm1_234_g               | superfamily | 130689 | 239 | 381 | 0.005177 | 39.0198 | cl31127 | PABP-1234 superfamily       |
| Aspau1_276540_CE276539_22863            | superfamily | 130689 | 251 | 371 | 0.003565 | 39.405  | cl31127 | PABP-1234 superfamily       |
| Asppuu1_223613_fgenes1_pm_25_70         | superfamily | 130689 | 251 | 372 | 0.000274 | 43.257  | cl31127 | PABP-1234 superfamily       |
| Aspoli1_1_6250_CE6249_657               | superfamily | 130689 | 243 | 405 | 0.001401 | 40.9458 | cl31127 | PABP-1234 superfamily       |
| Aspve1_50183_fgenes1_pm_2_510           | superfamily | 130689 | 251 | 371 | 0.003414 | 39.7902 | cl31127 | PABP-1234 superfamily       |
| Aspegy1_551680_MIX3662_607_41           | superfamily | 130689 | 258 | 391 | 9.43E-05 | 44.4126 | cl31127 | PABP-1234 superfamily       |
| PenchWisc1_1_147883_PCH_Pc22g_06890     | superfamily | 130689 | 211 | 359 | 0.008389 | 38.2494 | cl31127 | PABP-1234 superfamily       |
| Pench1_82669_e_gw1_5_1961_1             | superfamily | 130689 | 211 | 359 | 0.008389 | 38.2494 | cl31127 | PABP-1234 superfamily       |
| Aspsublat1_266359_gm1_214_g             | superfamily | 130689 | 376 | 485 | 0.000333 | 43.257  | cl31127 | PABP-1234 superfamily       |
| Greab1_512346_gm1_4707_g                | superfamily | 130689 | 246 | 389 | 0.003569 | 39.7902 | cl31127 | PABP-1234 superfamily       |
| Asppac1_380648_CE380647_8768            | superfamily | 130689 | 192 | 301 | 0.002665 | 39.405  | cl31127 | PABP-1234 superfamily       |
| Aspele1_405398_MIX9454_238_56           | superfamily | 130689 | 260 | 406 | 0.001065 | 41.331  | cl31127 | PABP-1234 superfamily       |
| Aspste1_29431_CE29430_987               | superfamily | 130689 | 260 | 406 | 0.001065 | 41.331  | cl31127 | PABP-1234 superfamily       |
| Penth1_215024_MIX4352_33_55             | superfamily | 130689 | 174 | 338 | 0.006009 | 39.0198 | cl31127 | PABP-1234 superfamily       |
| Penfla1_2487_PENFLA_c016G00194_T0       | superfamily | 130689 | 284 | 432 | 0.008245 | 38.6346 | cl31127 | PABP-1234 superfamily       |
| Asplaci1_168252_CE168251_518            | superfamily | 130689 | 260 | 376 | 0.001898 | 40.5606 | cl31127 | PABP-1234 superfamily       |
| Aspall1_110655_CE110654_1123            | superfamily | 130689 | 262 | 394 | 0.00231  | 40.1754 | cl31127 | PABP-1234 superfamily       |
| Asppet1_303650_fgenes1_pm_269_7         | superfamily | 130689 | 260 | 403 | 0.001935 | 40.5606 | cl31127 | PABP-1234 superfamily       |
| Aspnaka1_250958_MIX6022_1239_4_3        | superfamily | 130689 | 260 | 403 | 0.001655 | 40.5606 | cl31127 | PABP-1234 superfamily       |
| Pencop1_5028_PENCOP_c003G080_35T0       | superfamily | 130689 | 250 | 358 | 0.000222 | 43.6422 | cl31127 | PABP-1234 superfamily       |
| Penvul1_7577_PENVUL_c005G0279_9T0       | superfamily | 130689 | 264 | 354 | 0.002515 | 40.1754 | cl31127 | PABP-1234 superfamily       |
| Penja1_427213_fgenes1_pg_19_11_7        | superfamily | 130689 | 240 | 367 | 0.004431 | 39.0198 | cl31127 | PABP-1234 superfamily       |
| Penox1_6666_EPS31735                    | superfamily | 130689 | 254 | 374 | 0.000345 | 42.8718 | cl31127 | PABP-1234 superfamily       |
| Aspht1_385899_estExt_fgenes1_pm_C_60218 | superfamily | 130689 | 265 | 405 | 0.006289 | 39.0198 | cl31127 | PABP-1234 superfamily       |
| Aspsil1_65863_CE65862_1215              | superfamily | 130689 | 240 | 403 | 9.97E-05 | 44.4126 | cl31127 | PABP-1234 superfamily       |
| Mordim1_640321_fgenes1_pm_4_1_89        | superfamily | 130689 | 220 | 357 | 0.000521 | 42.4866 | cl31127 | PABP-1234 superfamily       |
| Kalbru1_871301_fgenes1_pm_45_1_1        | superfamily | 130689 | 332 | 463 | 1.73E-05 | 47.109  | cl31127 | PABP-1234 superfamily       |
| Aspniv1_268600_fgenes1_pm_28_1_19       | superfamily | 130689 | 257 | 389 | 0.005454 | 39.0198 | cl31127 | PABP-1234 superfamily       |
| Collu1_169917_CE169916_1745             | superfamily | 130689 | 200 | 328 | 0.001496 | 40.5606 | cl31127 | PABP-1234 superfamily       |
| Collup1_110_mrna_110                    | superfamily | 130689 | 182 | 310 | 0.001622 | 40.1754 | cl31127 | PABP-1234 superfamily       |
| Colta1_12878_mrna_10737                 | superfamily | 130689 | 200 | 328 | 0.00147  | 40.5606 | cl31127 | PABP-1234 superfamily       |
| Colme1_4403_mrna_4403                   | superfamily | 130689 | 200 | 328 | 0.00147  | 40.5606 | cl31127 | PABP-1234 superfamily       |
| Colny1_1022328_mrna_14048               | superfamily | 130689 | 182 | 310 | 0.001983 | 40.1754 | cl31127 | PABP-1234 superfamily       |
| Colpa1_2583_mrna_12400                  | superfamily | 130689 | 200 | 328 | 0.00147  | 40.5606 | cl31127 | PABP-1234 superfamily       |
| Colsi1_981014_mrna_9134                 | superfamily | 130689 | 182 | 310 | 0.001622 | 40.1754 | cl31127 | PABP-1234 superfamily       |
| Colsp1_16062_mrna_10460                 | superfamily | 130689 | 200 | 328 | 0.001458 | 40.5606 | cl31127 | PABP-1234 superfamily       |
| Colab1_2590_mrna_2590                   | superfamily | 130689 | 200 | 328 | 0.00147  | 40.5606 | cl31127 | PABP-1234 superfamily       |
| Colac2_413842_CE413841_4233             | superfamily | 130689 | 200 | 328 | 0.001203 | 40.9458 | cl31127 | PABP-1234 superfamily       |
| Colco1_2466_mrna_10454                  | superfamily | 130689 | 200 | 328 | 0.00147  | 40.5606 | cl31127 | PABP-1234 superfamily       |
| Pseudest1_4175_VC83_07417T0             | superfamily | 130689 | 308 | 427 | 0.000393 | 43.257  | cl31127 | PABP-1234 superfamily       |
| Aspcorr1_17087_fgenes1_pg_2_71          | superfamily | 130689 | 276 | 385 | 0.001087 | 41.331  | cl31127 | PABP-1234 superfamily       |
| PseVKM4520_1_8623_transcript_KFZ_04145  | superfamily | 130689 | 299 | 483 | 9.1E-05  | 45.183  | cl31127 | PABP-1234 superfamily       |

|                                         |             |        |     |     |          |         |         |                           |
|-----------------------------------------|-------------|--------|-----|-----|----------|---------|---------|---------------------------|
| Colgo1_593752_estExt_Genewise1_C_700088 | superfamily | 401645 | 113 | 220 | 0.000409 | 41.9452 | cl37801 | PAT1 superfamily          |
| Morpun1_621604_gm1_12914_g              | superfamily | 401645 | 265 | 411 | 4.06E-06 | 49.264  | cl37801 | PAT1 superfamily          |
| Dibbae1_12106_DIBA_005317_RA            | superfamily | 401645 | 257 | 509 | 1.18E-05 | 48.1084 | cl37801 | PAT1 superfamily          |
| Pyrom1_170259_CE170258_704              | superfamily | 401645 | 338 | 454 | 0.002259 | 40.7896 | cl37801 | PAT1 superfamily          |
| Disven1_216070_CE216069_7120            | superfamily | 401645 | 331 | 476 | 0.000688 | 42.3304 | cl37801 | PAT1 superfamily          |
| Gyrinf1_909748_gm1_3201_g               | superfamily | 401645 | 306 | 455 | 3.28E-05 | 46.5676 | cl37801 | PAT1 superfamily          |
| Morpun1_305293_CE305292_7373            | superfamily | 401645 | 314 | 460 | 2.27E-06 | 50.4196 | cl37801 | PAT1 superfamily          |
| Morsem1_780854_gm1_1210_g               | superfamily | 401645 | 337 | 459 | 7.11E-07 | 51.9604 | cl37801 | PAT1 superfamily          |
| Morsep1_638235_gm1_8211_g               | superfamily | 401645 | 336 | 458 | 0.000151 | 44.2564 | cl37801 | PAT1 superfamily          |
| Mordis1_541789_CE541788_18590           | superfamily | 401645 | 337 | 459 | 7.11E-07 | 51.9604 | cl37801 | PAT1 superfamily          |
| Mordun1_680394_gm1_2291_g               | superfamily | 401645 | 337 | 459 | 4.74E-07 | 52.3456 | cl37801 | PAT1 superfamily          |
| Morexim1_669366_gm4_3327_g              | superfamily | 401645 | 311 | 456 | 3.13E-06 | 49.6492 | cl37801 | PAT1 superfamily          |
| Morgal1_724471_gm1_10013_g              | superfamily | 401645 | 337 | 459 | 2.66E-07 | 53.116  | cl37801 | PAT1 superfamily          |
| Morhis1_593900_gm1_3542_g               | superfamily | 401645 | 337 | 459 | 8.97E-07 | 51.5752 | cl37801 | PAT1 superfamily          |
| Morimp1_459131_CE459130_2521            | superfamily | 401645 | 253 | 456 | 2.09E-06 | 50.4196 | cl37801 | PAT1 superfamily          |
| Morkaki1_926045_gm1_2820_g              | superfamily | 401645 | 337 | 459 | 7.11E-07 | 51.9604 | cl37801 | PAT1 superfamily          |
| Morpop1_743234_gm1_3876_g               | superfamily | 401645 | 312 | 458 | 4.41E-06 | 49.264  | cl37801 | PAT1 superfamily          |
| Morarb1_809916_gm1_3983_g               | superfamily | 401645 | 336 | 458 | 7.52E-07 | 51.9604 | cl37801 | PAT1 superfamily          |
| Morcom1_112030_CE112029_2693            | superfamily | 401645 | 336 | 458 | 0.000151 | 44.2564 | cl37801 | PAT1 superfamily          |
| Byssp1_8598_PVAR5_3070                  | superfamily | 227507 | 291 | 362 | 0.003166 | 40.0923 | cl34930 | PBP1 superfamily          |
| Paevr1_446888_fgenesh1_pg_10_2_84       | superfamily | 227507 | 257 | 331 | 0.000115 | 44.7147 | cl34930 | PBP1 superfamily          |
| Asptran1_51458_CE51457_955              | superfamily | 227507 | 297 | 349 | 0.000476 | 42.7887 | cl34930 | PBP1 superfamily          |
| Asppsev1_141556_CE141555_2824           | superfamily | 227507 | 267 | 333 | 0.004081 | 39.7071 | cl34930 | PBP1 superfamily          |
| Aspthe1_205577_CE205576_789             | superfamily | 227507 | 278 | 344 | 0.000518 | 42.4035 | cl34930 | PBP1 superfamily          |
| Theau2_114413_CE114412_1037             | superfamily | 227507 | 278 | 389 | 0.000529 | 42.4035 | cl34930 | PBP1 superfamily          |
| Aspdim1_324561_CE324560_2992            | superfamily | 227507 | 278 | 320 | 0.007988 | 38.5515 | cl34930 | PBP1 superfamily          |
| Aspsep1_353862_gm1_519_g                | superfamily | 227507 | 267 | 369 | 4.5E-05  | 45.8703 | cl34930 | PBP1 superfamily          |
| Cercau1_498346_fgenesh1_pg_5_89_2       | superfamily | 188093 | 305 | 443 | 0.005206 | 39.2951 | cl28216 | PCC superfamily           |
| Asppul1_480791_fgenesh1_pm_21_7_7       | superfamily | 330753 | 194 | 362 | 0.001939 | 40.4564 | cl25932 | Peptidase_S21 superfamily |
| Aspamb1_60919_CE60918_588               | superfamily | 330753 | 194 | 351 | 0.002611 | 40.0712 | cl25932 | Peptidase_S21 superfamily |
| Asplep1_202044_MIX5308_613_43           | superfamily | 330753 | 207 | 355 | 0.000158 | 43.9232 | cl25932 | Peptidase_S21 superfamily |
| Horth1_7120_B0A50_07715                 | superfamily | 222914 | 187 | 357 | 0.003326 | 39.5337 | cl14378 | PHA02666 superfamily      |
| Bissp1_590921_fgenesh1_pg_8_307         | superfamily | 177476 | 289 | 321 | 0.006711 | 38.5691 | cl14386 | PHA02694 superfamily      |
| Bissp1_681968_gm1_2465_g                | superfamily | 177476 | 289 | 321 | 0.006711 | 38.5691 | cl14386 | PHA02694 superfamily      |
| XyFL0043_310258_gm1_1083_g              | superfamily | 165099 | 305 | 472 | 0.001336 | 41.6621 | cl28620 | PHA02732 superfamily      |
| XyFL0064_1_194375_CE194374_258_69       | superfamily | 165099 | 305 | 472 | 0.003694 | 40.1213 | cl28620 | PHA02732 superfamily      |
| XyFL0933_397879_gm1_4623_g              | superfamily | 165099 | 305 | 472 | 0.001043 | 42.0473 | cl28620 | PHA02732 superfamily      |
| Clabul1_919033_fgenesh1_pm_2_59_2       | superfamily | 165099 | 266 | 354 | 0.002428 | 40.1213 | cl28620 | PHA02732 superfamily      |
| XyFL0662B_180039_CE180038_131_05        | superfamily | 223021 | 195 | 431 | 4.26E-05 | 46.4701 | cl33720 | PHA03247 superfamily      |
| Aspcro1_1_180735_gm1_2689_g             | superfamily | 223021 | 158 | 433 | 9.84E-05 | 44.9293 | cl33720 | PHA03247 superfamily      |
| Aspdese1_119105_CE119104_857            | superfamily | 223021 | 158 | 416 | 0.001398 | 41.0773 | cl33720 | PHA03247 superfamily      |
| Asprec1_1_191908_fgenesh1_pm_8_110      | superfamily | 223021 | 145 | 403 | 0.007804 | 38.7661 | cl33720 | PHA03247 superfamily      |
| Whamic1_278726_CE278725_9429            | superfamily | 223021 | 243 | 456 | 2.03E-05 | 47.6257 | cl33720 | PHA03247 superfamily      |
| Aspmul1_1_76639_CE76638_1411            | superfamily | 223021 | 185 | 416 | 3.83E-05 | 46.0849 | cl33720 | PHA03247 superfamily      |
| Aspsy1_141197_e_gw1_1_3398_1            | superfamily | 223021 | 185 | 415 | 0.007937 | 38.7661 | cl33720 | PHA03247 superfamily      |
| Hypmon1_280077_gm1_6001_g               | superfamily | 223021 | 251 | 451 | 0.003215 | 40.3069 | cl33720 | PHA03247 superfamily      |
| Aspreb1_562272_fgenesh1_pm_19_136       | superfamily | 223021 | 185 | 415 | 0.007937 | 38.7661 | cl33720 | PHA03247 superfamily      |
| Aspang1_236049_CE236048_16335           | superfamily | 223021 | 185 | 415 | 0.008428 | 38.7661 | cl33720 | PHA03247 superfamily      |
| Aspten1_724032_fgenesh1_pm_18_1_08      | superfamily | 223021 | 185 | 415 | 0.005683 | 39.1513 | cl33720 | PHA03247 superfamily      |
| Aurpu_var_sub1_151699_CE37585_2_806     | superfamily | 223021 | 215 | 561 | 2.17E-07 | 54.1741 | cl33720 | PHA03247 superfamily      |
| HyFL1284_2_494377_CE494376_146_87       | superfamily | 223021 | 259 | 453 | 0.000262 | 44.1589 | cl33720 | PHA03247 superfamily      |
| HyFL0543_1_254717_CE254716_470_3        | superfamily | 223021 | 270 | 454 | 0.000955 | 42.2329 | cl33720 | PHA03247 superfamily      |
| Hyptru1_275948_CE275947_5910            | superfamily | 223021 | 289 | 450 | 5.66E-05 | 46.0849 | cl33720 | PHA03247 superfamily      |
| DaFL1419_1_345443_gm1_2395_g            | superfamily | 223021 | 253 | 497 | 0.004858 | 39.9217 | cl33720 | PHA03247 superfamily      |
| HyFL1150_1_342001_CE342000_179_83       | superfamily | 223021 | 245 | 450 | 0.009489 | 38.7661 | cl33720 | PHA03247 superfamily      |
| Durrog2_329871_CE329870_6300            | superfamily | 223021 | 318 | 481 | 0.00169  | 41.4625 | cl33720 | PHA03247 superfamily      |
| Diadis1_433914_CE433913_3160            | superfamily | 223021 | 236 | 459 | 0.00555  | 39.5365 | cl33720 | PHA03247 superfamily      |
| AurpuNBB1_61416_fgenesh1_pg_Ch_r_3_937  | superfamily | 223021 | 220 | 522 | 0.001584 | 41.4625 | cl33720 | PHA03247 superfamily      |
| Aurpu_var_pul1_125056_CE125055_833      | superfamily | 223021 | 202 | 504 | 0.003359 | 40.3069 | cl33720 | PHA03247 superfamily      |
| Morpun1_621604_gm1_12914_g              | superfamily | 223021 | 148 | 369 | 0.000837 | 41.8477 | cl33720 | PHA03247 superfamily      |
| Xylhe1_58943_CE58942_4440               | superfamily | 223021 | 164 | 513 | 0.001252 | 41.8477 | cl33720 | PHA03247 superfamily      |
| Trigu1_1079894_gm1_687_g                | superfamily | 223021 | 233 | 512 | 0.000482 | 43.0033 | cl33720 | PHA03247 superfamily      |
| Aspres1_155452_fgenesh1_pm_44_2_3       | superfamily | 223021 | 188 | 437 | 0.003047 | 40.3069 | cl33720 | PHA03247 superfamily      |
| Aspneoca1_420959_fgenesh1_pm_4_8_28     | superfamily | 223021 | 188 | 436 | 0.002451 | 40.3069 | cl33720 | PHA03247 superfamily      |
| Aspparac1_23117_fgenesh1_pm_19_61       | superfamily | 223021 | 198 | 422 | 0.000569 | 42.6181 | cl33720 | PHA03247 superfamily      |
| Aspcapp1_640448_MIX5729_12396_39        | superfamily | 223021 | 185 | 438 | 1.87E-06 | 50.7073 | cl33720 | PHA03247 superfamily      |
| Aspcost1_14161_CE14160_477              | superfamily | 223021 | 185 | 438 | 2.58E-06 | 49.9369 | cl33720 | PHA03247 superfamily      |
| Aspcri1_817_SI65_00818T0                | superfamily | 223021 | 185 | 438 | 5.55E-05 | 45.6997 | cl33720 | PHA03247 superfamily      |
| Aspxer1_433916_fgenesh1_pm_206_6        | superfamily | 223021 | 195 | 432 | 0.000333 | 43.3885 | cl33720 | PHA03247 superfamily      |

|                                          |             |        |     |     |          |         |         |                      |
|------------------------------------------|-------------|--------|-----|-----|----------|---------|---------|----------------------|
| Aspnea1_168768_MIX2340_395_42            | superfamily | 223021 | 156 | 366 | 0.009599 | 38.3809 | cl33720 | PHA03247 superfamily |
| Aspmeg1_684705_fgenes1_pm_328_2          | superfamily | 223021 | 185 | 438 | 2.11E-06 | 50.3221 | cl33720 | PHA03247 superfamily |
| Aspgl1_207532_CE24847_5914               | superfamily | 223021 | 185 | 438 | 2.76E-06 | 49.9369 | cl33720 | PHA03247 superfamily |
| Aspend1_191559_MIX5366_11314_30          | superfamily | 223021 | 185 | 438 | 4.71E-06 | 49.1665 | cl33720 | PHA03247 superfamily |
| Aspapp1_408155_fgenes1_pm_14_54          | superfamily | 223021 | 185 | 438 | 3.96E-06 | 49.5517 | cl33720 | PHA03247 superfamily |
| Aspcib1_17512_fgenes1_pm_226_1           | superfamily | 223021 | 185 | 438 | 2.11E-06 | 50.3221 | cl33720 | PHA03247 superfamily |
| Aspumb1_258685_fgenes1_pm_12_28          | superfamily | 223021 | 185 | 438 | 3.89E-06 | 49.5517 | cl33720 | PHA03247 superfamily |
| Aspspir1_529994_fgenes1_pm_627_1         | superfamily | 223021 | 185 | 438 | 1.3E-06  | 51.0925 | cl33720 | PHA03247 superfamily |
| Eurhe1_445917_e_gw1_1_76_1               | superfamily | 223021 | 185 | 415 | 4.1E-06  | 49.1665 | cl33720 | PHA03247 superfamily |
| Aspses1_304000_gm1_5022_g                | superfamily | 223021 | 259 | 434 | 0.006847 | 39.1513 | cl33720 | PHA03247 superfamily |
| Aspoc7043_1_263276_CE263275_3164         | superfamily | 223021 | 153 | 405 | 0.003078 | 40.3069 | cl33720 | PHA03247 superfamily |
| Penswi1_394680_MIX5874_498_78            | superfamily | 223021 | 184 | 439 | 0.005932 | 39.1513 | cl33720 | PHA03247 superfamily |
| Penbr2_59855_gm1_7018_g                  | superfamily | 223021 | 185 | 375 | 0.003283 | 39.9217 | cl33720 | PHA03247 superfamily |
| PenbrAgRF18_1_352932_gm1_7044_g          | superfamily | 223021 | 185 | 375 | 0.003283 | 39.9217 | cl33720 | PHA03247 superfamily |
| Penbi1_395577_gm1_2196_g                 | superfamily | 223021 | 176 | 421 | 0.000379 | 43.0033 | cl33720 | PHA03247 superfamily |
| Pencit1_254762_CE254761_2471             | superfamily | 223021 | 199 | 423 | 3.13E-06 | 49.5517 | cl33720 | PHA03247 superfamily |
| Pengl1_108744_CE108743_3476              | superfamily | 223021 | 197 | 407 | 0.009101 | 38.3809 | cl33720 | PHA03247 superfamily |
| Aspdim1_324561_CE324560_2992             | superfamily | 223021 | 195 | 451 | 0.009198 | 38.7661 | cl33720 | PHA03247 superfamily |
| Penci1_68756_fgenes1_pm_1_55             | superfamily | 223021 | 186 | 417 | 0.007102 | 38.7661 | cl33720 | PHA03247 superfamily |
| Tubgib1_792848_CE792847_7656             | superfamily | 223021 | 213 | 485 | 1.1E-11  | 67.656  | cl33720 | PHA03247 superfamily |
| Morste1_980513_fgenes1_pg_42_56          | superfamily | 223021 | 219 | 484 | 0.000109 | 44.9293 | cl33720 | PHA03247 superfamily |
| Morulm1_217933_CE217932_11673            | superfamily | 223021 | 216 | 490 | 2.65E-05 | 47.2405 | cl33720 | PHA03247 superfamily |
| Morpal1_665669_fgenes1_pg_7_155          | superfamily | 223021 | 219 | 484 | 0.000109 | 44.9293 | cl33720 | PHA03247 superfamily |
| Morper1_529511_gm1_2481_g                | superfamily | 223021 | 216 | 490 | 6.78E-05 | 45.6997 | cl33720 | PHA03247 superfamily |
| Morame1_289268_CE289267_25619            | superfamily | 223021 | 215 | 490 | 0.000137 | 44.9293 | cl33720 | PHA03247 superfamily |
| Acastr1_126086_AST1_003652_RA            | superfamily | 223021 | 175 | 488 | 3.63E-06 | 49.9369 | cl33720 | PHA03247 superfamily |
| Rhiund1_233681_CE233680_7786             | superfamily | 223021 | 197 | 517 | 1.48E-06 | 51.0925 | cl33720 | PHA03247 superfamily |
| Tubcan1_380855_CE380854_3366             | superfamily | 223021 | 173 | 474 | 8.52E-09 | 58.4113 | cl33720 | PHA03247 superfamily |
| Tubma1_358792_estExt_fgenes1_pm_C_590028 | superfamily | 223021 | 196 | 494 | 5.81E-08 | 55.7149 | cl33720 | PHA03247 superfamily |
| Tubme1_1564813_CE1564812_2534            | superfamily | 223021 | 204 | 495 | 3.75E-08 | 56.4853 | cl33720 | PHA03247 superfamily |
| Morpun1_305293_CE305292_7373             | superfamily | 223021 | 197 | 418 | 0.00041  | 43.3885 | cl33720 | PHA03247 superfamily |
| Mortrid1_302523_CE302522_7959            | superfamily | 223021 | 216 | 480 | 0.002913 | 40.3069 | cl33720 | PHA03247 superfamily |
| Morpop1_743234_gm1_3876_g                | superfamily | 223021 | 195 | 416 | 0.000569 | 42.6181 | cl33720 | PHA03247 superfamily |
| Wilmi1_23576_CE23575_26409               | superfamily | 223021 | 195 | 480 | 0.000275 | 43.7737 | cl33720 | PHA03247 superfamily |
| Symko1_912548_gm1_2423_g                 | superfamily | 223021 | 187 | 497 | 1.1E-08  | 58.0261 | cl33720 | PHA03247 superfamily |
| Chove1_1826598_fgenes1_pm_17_34          | superfamily | 223021 | 196 | 454 | 4.54E-06 | 49.5517 | cl33720 | PHA03247 superfamily |
| Drest1_4164_transcript_EWC44790          | superfamily | 223021 | 204 | 502 | 0.001655 | 41.4625 | cl33720 | PHA03247 superfamily |
| Monha1_3262_H072_3272m_01                | superfamily | 223021 | 188 | 505 | 1.56E-06 | 51.0925 | cl33720 | PHA03247 superfamily |
| Artol1_3367_AOL_s00054g700m_01           | superfamily | 223021 | 191 | 492 | 4.67E-07 | 52.6333 | cl33720 | PHA03247 superfamily |
| Rhesp1_478824_fgenes1_pg_9_739           | superfamily | 223021 | 287 | 465 | 0.000912 | 42.2329 | cl33720 | PHA03247 superfamily |
| XylFL1651_14110_CE14109_2030             | superfamily | 223021 | 305 | 473 | 0.00456  | 39.9217 | cl33720 | PHA03247 superfamily |
| Aspsul1_272486_MIX4213_69_29             | superfamily | 165527 | 262 | 337 | 0.005984 | 38.9412 | cl29788 | PHA03269 superfamily |
| Sposc1_1671_transcript_KJR88247          | superfamily | 223039 | 198 | 520 | 0.004637 | 39.7693 | cl33723 | PHA03307 superfamily |
| Pezech1_522757_fgenes1_pg_4_233          | superfamily | 223039 | 181 | 448 | 0.000741 | 42.4657 | cl33723 | PHA03307 superfamily |
| Xylni1_489422_gm1_3787_g                 | superfamily | 223039 | 246 | 470 | 0.008445 | 38.9989 | cl33723 | PHA03307 superfamily |
| Lepor2_18801_CE18800_899                 | superfamily | 223065 | 256 | 461 | 0.002347 | 40.4356 | cl33729 | PHA03378 superfamily |
| Leptod1_121175_CE121174_236              | superfamily | 223065 | 255 | 460 | 0.00255  | 40.4356 | cl33729 | PHA03378 superfamily |
| Aspsublat1_266359_gm1_214_g              | superfamily | 223065 | 307 | 535 | 0.007338 | 39.28   | cl33729 | PHA03378 superfamily |
| Asppha1_9206_e_gw1_21_6_1                | superfamily | 223065 | 183 | 342 | 0.008359 | 38.5096 | cl33729 | PHA03378 superfamily |
| Penbra1_2892_PMG11_10838_1               | superfamily | 223066 | 197 | 415 | 0.001052 | 41.5825 | cl33730 | PHA03379 superfamily |
| DalEC12_1_16361_fgenes1_pg_45_62         | superfamily | 215130 | 369 | 447 | 0.002168 | 40.8428 | cl33436 | PLN02217 superfamily |
| Dales1_408390_gm1_3308_g                 | superfamily | 215130 | 369 | 447 | 0.002168 | 40.8428 | cl33436 | PLN02217 superfamily |
| Ascim1_142889_CE142888_20276             | superfamily | 178748 | 357 | 552 | 0.003603 | 39.9095 | cl25752 | PLN03209 superfamily |
| Aspala1_66912_CE66911_923                | superfamily | 235738 | 199 | 327 | 0.009404 | 38.1514 | cl29858 | PRK06199 superfamily |
| Aspflo1_170160_fgenes1_pm_193_3          | superfamily | 235738 | 199 | 319 | 0.001654 | 40.4626 | cl29858 | PRK06199 superfamily |
| Asppseute1_515099_gm1_696_g              | superfamily | 235738 | 199 | 327 | 0.007755 | 38.1514 | cl29858 | PRK06199 superfamily |
| Asppterr1_57289_CE57288_800              | superfamily | 235738 | 199 | 327 | 0.007755 | 38.1514 | cl29858 | PRK06199 superfamily |
| Aspirs1_11271_e_gw1_52_33_1              | superfamily | 236090 | 179 | 377 | 0.002479 | 40.3545 | cl35613 | PRK07764 superfamily |
| DimP5P66_683541_gm1_1866_g               | superfamily | 236669 | 235 | 348 | 1.2E-05  | 48.1575 | cl35903 | PRK10263 superfamily |
| Atrpi1_262617_CE262616_1724              | superfamily | 236669 | 347 | 476 | 1.54E-05 | 47.7723 | cl35903 | PRK10263 superfamily |
| Helsp1_214291_CE214290_1000              | superfamily | 236669 | 317 | 462 | 3.21E-05 | 47.0019 | cl35903 | PRK10263 superfamily |
| Rhili1_70431_gm1_598_g                   | superfamily | 236669 | 314 | 496 | 0.000791 | 42.7647 | cl35903 | PRK10263 superfamily |
| Ascsa1_3256_3256_t                       | superfamily | 236669 | 233 | 434 | 0.007611 | 39.2979 | cl35903 | PRK10263 superfamily |
| NeoP8C63_1_502875_gw1_8_967_1            | superfamily | 236669 | 186 | 304 | 0.00129  | 40.4535 | cl35903 | PRK10263 superfamily |
| Penox1_6666_EPS31735                     | superfamily | 236669 | 175 | 290 | 0.004099 | 39.6831 | cl35903 | PRK10263 superfamily |
| Morpra1_659604_gm1_3795_g                | superfamily | 236669 | 260 | 358 | 0.009584 | 38.1423 | cl35903 | PRK10263 superfamily |
| Disven1_216070_CE216069_7120             | superfamily | 236669 | 249 | 402 | 1.29E-06 | 51.2391 | cl35903 | PRK10263 superfamily |
| Mortrid1_302523_CE302522_7959            | superfamily | 236669 | 270 | 398 | 2.58E-05 | 47.0019 | cl35903 | PRK10263 superfamily |
| Morhis1_593900_gm1_3542_g                | superfamily | 236669 | 269 | 374 | 0.003848 | 40.0683 | cl35903 | PRK10263 superfamily |
| Morarb1_809916_gm1_3983_g                | superfamily | 236669 | 269 | 373 | 0.000115 | 45.0759 | cl35903 | PRK10263 superfamily |
| Morcra1_717040_e_gw1_7_985_1             | superfamily | 236669 | 350 | 462 | 0.000142 | 44.6907 | cl35903 | PRK10263 superfamily |
| Kalbru1_871301_fgenes1_pm_45_11          | superfamily | 236669 | 250 | 379 | 0.008033 | 38.9127 | cl35903 | PRK10263 superfamily |
| Drest1_4164_transcript_EWC44790          | superfamily | 236669 | 235 | 358 | 8.14E-05 | 45.4611 | cl35903 | PRK10263 superfamily |
| Usnflor1_883971_gm1_180_g                | superfamily | 236669 | 276 | 500 | 3.45E-06 | 49.6983 | cl35903 | PRK10263 superfamily |
| Clasam1_183810_e_gw1_114_31_1            | superfamily | 236669 | 271 | 379 | 0.001335 | 41.2239 | cl35903 | PRK10263 superfamily |



|                                                    |             |        |     |     |          |         |         |                      |
|----------------------------------------------------|-------------|--------|-----|-----|----------|---------|---------|----------------------|
| Pse03VT05_1_10084_transcript_OBT81208              | superfamily | 236669 | 449 | 601 | 0.000183 | 45.0759 | cl35903 | PRK10263 superfamily |
| PseVKM103_1_3106_transcript_KFY70960               | superfamily | 236669 | 296 | 421 | 0.000973 | 42.3795 | cl35903 | PRK10263 superfamily |
| Psever1_5459_transcript_OBT96375                   | superfamily | 236669 | 296 | 421 | 0.000973 | 42.3795 | cl35903 | PRK10263 superfamily |
| Racan1_16771_transcript_OQO11207                   | superfamily | 236776 | 305 | 434 | 0.007895 | 38.4688 | cl35960 | PRK10856 superfamily |
| Vercon1_515741_gm1_4728_g                          | superfamily | 184281 | 252 | 304 | 6.02E-05 | 45.5843 | cl42933 | PRK13729 superfamily |
| Cocim1_1365_CIMG_01530T0                           | superfamily | 184918 | 119 | 257 | 0.00117  | 40.3115 | cl33039 | PRK14954 superfamily |
| Cocpo1_1_701_XM_003065653_1                        | superfamily | 184918 | 119 | 257 | 0.005968 | 38.0003 | cl33039 | PRK14954 superfamily |
| Cocpos1_1642_transcript_EFW21485                   | superfamily | 184918 | 119 | 257 | 0.005968 | 38.0003 | cl33039 | PRK14954 superfamily |
| Thiar1_799126_gm1_5654_g                           | superfamily | 184923 | 316 | 399 | 0.000304 | 43.1299 | cl33044 | PRK14959 superfamily |
| Diahe1_11252_transcript_POS73860                   | superfamily | 237874 | 281 | 390 | 0.002256 | 40.1439 | cl36455 | PRK14971 superfamily |
| Aspfu_A1163_1_105763_CADAFUBT00006741m_01          | superfamily | 237874 | 314 | 420 | 0.006039 | 38.9883 | cl36455 | PRK14971 superfamily |
| Aspfu1_5533_Afu4g10860_mRNA                        | superfamily | 237874 | 314 | 420 | 0.006039 | 38.9883 | cl36455 | PRK14971 superfamily |
| Aspfumis1_355574_gm1_9052_g                        | superfamily | 237874 | 293 | 399 | 0.005294 | 38.9883 | cl36455 | PRK14971 superfamily |
| Talis1_3287_transcript_CRG84753                    | superfamily | 237874 | 347 | 424 | 0.009585 | 38.2179 | cl36455 | PRK14971 superfamily |
| Delst1_397656_gm1_3590_g                           | superfamily | 140276 | 242 | 387 | 2.4E-05  | 46.9486 | cl25531 | PTZ00249 superfamily |
| Cocst1_652272_gm1_6102_g                           | superfamily | 185594 | 216 | 520 | 0.000141 | 45.0659 | cl33180 | PTZ00395 superfamily |
| Dalgra1_449902_gm1_6286_g                          | superfamily | 185594 | 255 | 462 | 5.19E-05 | 46.2215 | cl33180 | PTZ00395 superfamily |
| Cadosp1_19220_CE19219_2329                         | superfamily | 185594 | 283 | 464 | 0.006799 | 39.288  | cl33180 | PTZ00395 superfamily |
| Anntru1_450935_fgenes1_pm_10_44                    | superfamily | 185594 | 307 | 467 | 0.001623 | 41.2139 | cl33180 | PTZ00395 superfamily |
| Annnit1_486340_fgenes1_pm_4_141                    | superfamily | 185594 | 301 | 461 | 0.000307 | 43.5251 | cl33180 | PTZ00395 superfamily |
| AnFL0455_488237_fgenes1_pm_11_17                   | superfamily | 185594 | 307 | 467 | 0.005367 | 39.6732 | cl33180 | PTZ00395 superfamily |
| Roster1_238892_CE238891_7903                       | superfamily | 185594 | 265 | 469 | 1.65E-05 | 47.7623 | cl33180 | PTZ00395 superfamily |
| Dalcal1_454946_gm1_1006_g                          | superfamily | 185594 | 295 | 486 | 0.000402 | 43.1399 | cl33180 | PTZ00395 superfamily |
| Nemsp1_7155_e_gw1_14_99_1                          | superfamily | 185594 | 302 | 481 | 0.00353  | 40.0584 | cl33180 | PTZ00395 superfamily |
| Annbov1_186727_CE186726_4036                       | superfamily | 185594 | 254 | 478 | 4.49E-06 | 49.6883 | cl33180 | PTZ00395 superfamily |
| Annmin1_336594_gm1_7801_g                          | superfamily | 185594 | 308 | 464 | 0.006821 | 39.288  | cl33180 | PTZ00395 superfamily |
| Ternu1_356180_gm1_9443_g                           | superfamily | 185594 | 381 | 456 | 0.009673 | 38.5176 | cl33180 | PTZ00395 superfamily |
| DallocAZ0526_2_245442_CE245441_4272                | superfamily | 185594 | 255 | 462 | 0.004099 | 40.0584 | cl33180 | PTZ00395 superfamily |
| Dalloc1_208028_CE208027_5292                       | superfamily | 185594 | 255 | 462 | 0.00403  | 40.0584 | cl33180 | PTZ00395 superfamily |
| Dallocu1_390419_gm1_8387_g                         | superfamily | 185594 | 255 | 462 | 0.001261 | 41.5991 | cl33180 | PTZ00395 superfamily |
| Dalver1_16357_CE16356_3947                         | superfamily | 185594 | 255 | 462 | 0.000398 | 43.1399 | cl33180 | PTZ00395 superfamily |
| Daldec1_393854_gm1_9767_g                          | superfamily | 185594 | 255 | 461 | 0.000645 | 42.7547 | cl33180 | PTZ00395 superfamily |
| ThoPMI491_1_832405_gm1_17937_g                     | superfamily | 185594 | 232 | 425 | 1.2E-05  | 47.7623 | cl33180 | PTZ00395 superfamily |
| Hyppol1_515196_fgenes1_pm_1_908                    | superfamily | 185594 | 266 | 477 | 8E-07    | 51.9995 | cl33180 | PTZ00395 superfamily |
| HypEC38_3_48899_CE48898_7281                       | superfamily | 185594 | 186 | 399 | 0.00631  | 39.288  | cl33180 | PTZ00395 superfamily |
| Hypsub2_597084_gm1_11347_g                         | superfamily | 185594 | 313 | 489 | 0.000277 | 43.9103 | cl33180 | PTZ00395 superfamily |
| Hypfus1_70173_CE70172_3691                         | superfamily | 185594 | 251 | 475 | 0.000266 | 43.9103 | cl33180 | PTZ00395 superfamily |
| DalEC12_1_16361_fgenes1_pg_45_62                   | superfamily | 185594 | 299 | 468 | 0.004121 | 40.0584 | cl33180 | PTZ00395 superfamily |
| Dales1_408390_gm1_3308_g                           | superfamily | 185594 | 299 | 468 | 0.004121 | 40.0584 | cl33180 | PTZ00395 superfamily |
| DaFL1419_1_345443_gm1_2395_g                       | superfamily | 185594 | 353 | 469 | 0.000717 | 42.3695 | cl33180 | PTZ00395 superfamily |
| Dalba1_464621_CE464620_5566                        | superfamily | 185594 | 299 | 468 | 0.000187 | 44.2955 | cl33180 | PTZ00395 superfamily |
| CodFL1790_1_478297_CE478296_8621                   | superfamily | 185594 | 198 | 410 | 3.27E-05 | 46.6067 | cl33180 | PTZ00395 superfamily |
| Hypcro1_250519_CE250518_1983                       | superfamily | 185594 | 300 | 479 | 1.13E-06 | 51.6143 | cl33180 | PTZ00395 superfamily |
| Khuory1_486037_gm1_7291_g                          | superfamily | 185594 | 291 | 481 | 0.000914 | 41.9843 | cl33180 | PTZ00395 superfamily |
| Microd1_393019_CE393018_808                        | superfamily | 185594 | 255 | 372 | 9.91E-05 | 44.6807 | cl33180 | PTZ00395 superfamily |
| HyNC1633_2_285756_CE285755_4352                    | superfamily | 185594 | 291 | 460 | 0.000143 | 44.6807 | cl33180 | PTZ00395 superfamily |
| Aulhe2_145701_CE145700_2094                        | superfamily | 185594 | 289 | 408 | 5.87E-07 | 52.7699 | cl33180 | PTZ00395 superfamily |
| XylFL2044_528640_CE528639_10210                    | superfamily | 185594 | 253 | 479 | 0.002288 | 40.8288 | cl33180 | PTZ00395 superfamily |
| Hypcer1_444443_gm1_8998_g                          | superfamily | 185594 | 305 | 466 | 0.001038 | 41.9843 | cl33180 | PTZ00395 superfamily |
| Sepmu1_150595_estExt_fgenes1_kg_C_80121            | superfamily | 185594 | 185 | 371 | 6.59E-05 | 45.4511 | cl33180 | PTZ00395 superfamily |
| Seppo1_104957_e_gw1_49_50_1                        | superfamily | 185594 | 185 | 371 | 5.43E-05 | 45.8363 | cl33180 | PTZ00395 superfamily |
| Aspfia1_10994_CE10993_1982                         | superfamily | 185594 | 210 | 415 | 2.78E-05 | 46.6067 | cl33180 | PTZ00395 superfamily |
| Asplup1_30430_CE30429_806                          | superfamily | 185594 | 210 | 428 | 0.001482 | 41.2139 | cl33180 | PTZ00395 superfamily |
| Aspaufu1_66057_CE66056_4904                        | superfamily | 185594 | 210 | 428 | 0.001482 | 41.2139 | cl33180 | PTZ00395 superfamily |
| LecAK0013_1_428236_gm1_5036_g                      | superfamily | 185594 | 355 | 423 | 0.007076 | 38.9028 | cl33180 | PTZ00395 superfamily |
| Conioc1_1218938_gm1_9586_g                         | superfamily | 185594 | 316 | 419 | 0.008005 | 38.9028 | cl33180 | PTZ00395 superfamily |
| Rhier1_107831_CE107830_2851                        | superfamily | 185594 | 329 | 539 | 0.000395 | 43.5251 | cl33180 | PTZ00395 superfamily |
| Calpu1_4735_NODE_3258_length_38655_cov_28_g5970_t1 | superfamily | 185594 | 253 | 469 | 0.000764 | 42.3695 | cl33180 | PTZ00395 superfamily |
| Astsub1_449165_fgenes1_pm_10_114                   | superfamily | 185594 | 321 | 514 | 0.000325 | 43.5251 | cl33180 | PTZ00395 superfamily |
| Rosne1_5623_transcript_GAP86838                    | superfamily | 185594 | 322 | 505 | 0.00232  | 40.8288 | cl33180 | PTZ00395 superfamily |
| Xylcur14988_1_309955_CE309954_31611                | superfamily | 185594 | 321 | 515 | 0.000981 | 41.9843 | cl33180 | PTZ00395 superfamily |
| Kalpe1_790107_gm1_2759_g                           | superfamily | 185628 | 198 | 431 | 2.95E-05 | 46.9918 | cl33186 | PTZ00449 superfamily |
| Chathe1_4717_ma4029_CTH_0040580                    | superfamily | 185628 | 270 | 358 | 0.005352 | 38.9026 | cl33186 | PTZ00449 superfamily |
| Aspind2_1_51049_CE51048_481                        | superfamily | 273167 | 297 | 406 | 0.004283 | 39.1079 | cl36702 | rad23 superfamily    |
| Aspden1_306100_fgenes1_pm_31_32                    | superfamily | 273167 | 312 | 415 | 0.008974 | 37.9523 | cl36702 | rad23 superfamily    |
| Aspidn1_7660_AN1959                                | superfamily | 273167 | 312 | 415 | 0.008974 | 37.9523 | cl36702 | rad23 superfamily    |
| Aspsim1_1_210230_fgenes1_pm_268_3                  | superfamily | 273167 | 310 | 413 | 0.003747 | 39.4931 | cl36702 | rad23 superfamily    |
| Aspquaf1_141330_fgenes1_pm_53_8                    | superfamily | 273167 | 310 | 413 | 0.009905 | 37.9523 | cl36702 | rad23 superfamily    |

|              |                                       |             |        |     |     |          |         |         |                        |
|--------------|---------------------------------------|-------------|--------|-----|-----|----------|---------|---------|------------------------|
|              | Aspquag1_206370_fgenes1_pm_1_116      | superfamily | 273167 | 310 | 413 | 0.008839 | 37.9523 | cl36702 | rad23 superfamily      |
|              | Aspne1_174748_fgenes1_pm_14_125       | superfamily | 273167 | 310 | 413 | 0.003285 | 39.4931 | cl36702 | rad23 superfamily      |
|              | Nemabo1_276610_fgenes1_pm_36_32       | superfamily | 227709 | 258 | 437 | 0.004442 | 39.8743 | cl34999 | ROM1 superfamily       |
|              | Xylcas124033_1_536617_fgenes1_pm_1_33 | superfamily | 227709 | 255 | 437 | 0.000433 | 42.9559 | cl34999 | ROM1 superfamily       |
|              | Stano2_12077_SNOG_06311_3             | superfamily | 227709 | 209 | 404 | 0.001952 | 40.6447 | cl34999 | ROM1 superfamily       |
|              | Xylcub1_115841_CE115840_8851          | superfamily | 227709 | 226 | 408 | 0.005432 | 39.4891 | cl34999 | ROM1 superfamily       |
|              | Xyllon1_324705_CE324704_6320          | superfamily | 227709 | 255 | 437 | 0.001762 | 41.0299 | cl34999 | ROM1 superfamily       |
|              | Xylpal1_13187_CE13186_16498           | superfamily | 227709 | 230 | 437 | 0.002324 | 40.6447 | cl34999 | ROM1 superfamily       |
|              | Xylpal124036_1_502044_CE502043_22996  | superfamily | 227709 | 259 | 437 | 0.000851 | 42.1855 | cl34999 | ROM1 superfamily       |
|              | Xylscr1_65814_CE65813_19150           | superfamily | 227709 | 255 | 437 | 0.009432 | 38.7187 | cl34999 | ROM1 superfamily       |
|              | XyFL1777_1_188759_CE188758_29744      | superfamily | 227709 | 230 | 437 | 0.002324 | 40.6447 | cl34999 | ROM1 superfamily       |
|              | Xylacu1_386729_CE386728_33109         | superfamily | 227709 | 291 | 436 | 0.004318 | 39.8743 | cl34999 | ROM1 superfamily       |
|              | Xylber1_610185_fgenes1_pm_22_73       | superfamily | 227709 | 255 | 437 | 0.000121 | 44.8819 | cl34999 | ROM1 superfamily       |
|              | Xylcube1_404787_CE404786_17919        | superfamily | 227709 | 255 | 437 | 0.006149 | 39.4891 | cl34999 | ROM1 superfamily       |
|              | Xylcur1_163938_CE163937_19555         | superfamily | 227709 | 241 | 439 | 0.000167 | 44.4967 | cl34999 | ROM1 superfamily       |
|              | CopCBS38678_1_396434_gm1_8166_g       | superfamily | 435789 | 309 | 360 | 0.007251 | 36.0387 | cl25441 | SdrD_B superfamily     |
|              | Atpi1_262617_CE262616_1724            | superfamily | 273740 | 476 | 540 | 0.005579 | 39.23   | cl36947 | sex-lethal superfamily |
|              | Helsp1_214291_CE214290_1000           | superfamily | 273740 | 454 | 518 | 0.003178 | 39.6152 | cl36947 | sex-lethal superfamily |
|              | Clasph1_3161_CSPH_06747_R0            | superfamily | 431280 | 209 | 362 | 0.001846 | 40.8572 | cl25817 | SOG2 superfamily       |
|              | Cerbe1_9556_transcript_PPJ55552       | superfamily | 431280 | 178 | 333 | 0.004322 | 39.3164 | cl25817 | SOG2 superfamily       |
|              | Aspdese1_119105_CE119104_857          | superfamily | 425992 | 246 | 343 | 0.000542 | 41.8666 | cl03073 | TYA superfamily        |
|              | Aspstec1_1_285561_MIX1500_3147_72     | superfamily | 425992 | 200 | 328 | 7.61E-05 | 44.563  | cl03073 | TYA superfamily        |
|              | Aspre1_1_191908_fgenes1_pm_8_110      | superfamily | 425992 | 233 | 330 | 0.000237 | 43.0222 | cl03073 | TYA superfamily        |
|              | Aspid2_1_51049_CE51048_481            | superfamily | 425992 | 212 | 342 | 0.000398 | 42.2518 | cl03073 | TYA superfamily        |
|              | Aspauran1_592382_fgenes1_pm_62_4      | superfamily | 425992 | 205 | 335 | 6.16E-05 | 44.9482 | cl03073 | TYA superfamily        |
|              | Aspestel1_162011_gm1_1077_g           | superfamily | 425992 | 202 | 332 | 0.000528 | 41.8666 | cl03073 | TYA superfamily        |
|              | Aspsulp1_600936_MIX11217_22819_41     | superfamily | 425992 | 222 | 352 | 0.000632 | 41.8666 | cl03073 | TYA superfamily        |
|              | Aspden1_306100_fgenes1_pm_31_32       | superfamily | 425992 | 227 | 357 | 0.000615 | 41.8666 | cl03073 | TYA superfamily        |
|              | Aspnid1_7660_AN1959                   | superfamily | 425992 | 227 | 357 | 0.000615 | 41.8666 | cl03073 | TYA superfamily        |
|              | ConPMI546_971001_gm1_8133_g           | superfamily | 425992 | 268 | 395 | 0.006285 | 38.3998 | cl03073 | TYA superfamily        |
|              | Aspsim1_1_210230_fgenes1_pm_26_8_3    | superfamily | 425992 | 225 | 355 | 0.000127 | 43.7926 | cl03073 | TYA superfamily        |
|              | Aspquaf1_141330_fgenes1_pm_53_8       | superfamily | 425992 | 225 | 355 | 0.000606 | 41.8666 | cl03073 | TYA superfamily        |
|              | Aspquag1_206370_fgenes1_pm_1_116      | superfamily | 425992 | 225 | 355 | 0.000616 | 41.8666 | cl03073 | TYA superfamily        |
|              | Aspfove1_148079_fgenes1_pm_8_5_3      | superfamily | 425992 | 225 | 355 | 0.000715 | 41.4814 | cl03073 | TYA superfamily        |
|              | Aspne1_174748_fgenes1_pm_14_125       | superfamily | 425992 | 225 | 355 | 0.000143 | 43.7926 | cl03073 | TYA superfamily        |
| Sac-Tap-VelB | Cybfa1_4877_transcript:ONH66347       | superfamily | 436858 | 27  | 59  | 0.009882 | 37.5133 | cl40954 | DUF5695 superfamily    |
|              | Saico1_6726_gm1_2578_g                | superfamily | 237874 | 112 | 192 | 0.007569 | 38.9883 | cl36455 | PRK14971 superfamily   |
| Sac-VeA      | Lipst1_1_267564_CE146447_5148         | superfamily | 236669 | 348 | 502 | 0.002075 | 41.2239 | cl35903 | PRK10263 superfamily   |
|              | Cybfa1_2210_transcript:ONH68672       | superfamily | 236669 | 289 | 394 | 0.002756 | 40.0683 | cl35903 | PRK10263 superfamily   |
