# Supplementary material for: Phylogenomics analysis of velvet regulators in the fungal kingdom
Source: PubMed Central journal article supplement (PMC10845976; doi:10.1128/spectrum.03717-23), 2024-01-05
Supplement: spectrum.03717-23-s0003.pdf [file spectrum.03717-23-s0003.pdf]

**Table S2. Top 300 similar structures of VosA velvet domain in the PDB database by the Dali server**

| Chain | Z      | RMSD | lali | nres | Sequence identity % | Description |                                                                                        |
|-------|--------|------|------|------|---------------------|-------------|----------------------------------------------------------------------------------------|
| 1     | 1bvo-A | 10.6 | 2.5  | 112  | 175                 | 15          | DNA DUPLEX;                                                                            |
| 2     | 3do7-B | 10.4 | 2.7  | 118  | 293                 | 18          | AVIAN RETICULOENDOTHELIOSIS VIRAL (V-REL)                                              |
| 3     | 1ooa-B | 10.4 | 2.7  | 118  | 313                 | 17          | RNA APTAMER;                                                                           |
| 4     | 1a3q-B | 10.4 | 2.8  | 115  | 285                 | 17          | DNA (5'-D(*GP*GP*GP*GP*AP*AP*TP*CP*CP*CP*C)-3');                                       |
| 5     | 1ooa-A | 10.4 | 2.6  | 116  | 313                 | 16          | RNA APTAMER;                                                                           |
| 6     | 3gut-F | 10.3 | 2.9  | 120  | 312                 | 17          | TRANSCRIPTION FACTOR P65;                                                              |
| 7     | 3gut-B | 10.3 | 2.8  | 119  | 312                 | 17          | TRANSCRIPTION FACTOR P65;                                                              |
| 8     | 1a3q-A | 10.3 | 2.7  | 116  | 285                 | 19          | DNA (5'-D(*GP*GP*GP*GP*AP*AP*TP*CP*CP*CP*C)-3');                                       |
| 9     | 2o61-B | 10.3 | 2.8  | 118  | 314                 | 17          | 36-MER;                                                                                |
| 10    | 2v2t-B | 10.2 | 2.8  | 118  | 313                 | 18          | TRANSCRIPTION FACTOR RELB;                                                             |
| 11    | 1imh-D | 10   | 2.9  | 120  | 281                 | 17          | TonEBP/DNA COMPLEX                                                                     |
| 12    | 4y5u-B | 9.9  | 3.5  | 117  | 438                 | 11          | SIGNAL TRANSDUCER AND ACTIVATOR OF TRANSCRIPTION                                       |
| 13    | 1nfk-B | 9.9  | 3    | 119  | 312                 | 17          | DNA (5'-D(*TP*GP*GP*GP*AP*AP*TP*TP*CP*CP*C)-3');                                       |
| 14    | 1owr-M | 9.9  | 3.2  | 121  | 284                 | 19          | NFAT1 MONOMERIC BINDING SITE, PLUS STRAND;                                             |
| 15    | 1imh-C | 9.9  | 3    | 121  | 281                 | 17          | TonEBP/DNA COMPLEX                                                                     |
| 16    | 1p7h-N | 9.9  | 3.3  | 121  | 286                 | 19          | 5'-D(*AP*AP*TP*GP*GP*GP*GP*AP*CP*TP*TP*TP*CP*CP*A                                      |
| 17    | 1owr-Q | 9.9  | 3.2  | 123  | 284                 | 20          | NFAT1 MONOMERIC BINDING SITE, PLUS STRAND;                                             |
| 18    | 1owr-P | 9.8  | 3.3  | 123  | 284                 | 20          | NFAT1 MONOMERIC BINDING SITE, PLUS STRAND;                                             |
| 19    | 1pzu-I | 9.8  | 3.1  | 119  | 276                 | 19          | 5'-D(*TP*TP*GP*AP*GP*GP*AP*AP*TP*TP*TP*CP*CP*A)-                                       |
| 20    | 1owr-N | 9.8  | 3.3  | 123  | 284                 | 19          | NFAT1 MONOMERIC BINDING SITE, PLUS STRAND;                                             |
| 21    | 1pzu-B | 9.8  | 3.1  | 119  | 276                 | 19          | 5'-D(*TP*TP*GP*AP*GP*GP*AP*AP*TP*TP*TP*CP*CP*A)-                                       |
| 22    | 1pzu-D | 9.8  | 3.2  | 119  | 276                 | 19          | 5'-D(*TP*TP*GP*AP*GP*GP*AP*AP*TP*TP*TP*CP*CP*A)-                                       |
| 23    | 1pzu-M | 9.8  | 3.1  | 119  | 276                 | 19          | 5'-D(*TP*TP*GP*AP*GP*GP*AP*AP*TP*TP*TP*CP*CP*A)-                                       |
| 24    | 4y5u-A | 9.7  | 3.4  | 116  | 445                 | 11          | SIGNAL TRANSDUCER AND ACTIVATOR OF TRANSCRIPTION                                       |
| 25    | 3qrf-N | 9.7  | 3.4  | 124  | 286                 | 19          | NUCLEAR FACTOR OF ACTIVATED T-CELLS, CYTOPLASMIC                                       |
| 26    | 1pzu-L | 9.7  | 3.7  | 123  | 276                 | 19          | 5'-D(*TP*TP*GP*AP*GP*GP*AP*AP*TP*TP*TP*CP*CP*A)-                                       |
| 27    | 1pzu-H | 9.7  | 3.1  | 119  | 276                 | 19          | 5'-D(*TP*TP*GP*AP*GP*GP*AP*AP*TP*TP*TP*CP*CP*A)-                                       |
| 28    | 1p7h-O | 9.7  | 3.2  | 121  | 286                 | 19          | 5'-D(*AP*AP*TP*GP*GP*GP*GP*AP*CP*TP*TP*TP*CP*CP*A                                      |
| 29    | 3qrf-M | 9.7  | 3.4  | 123  | 286                 | 20          | NUCLEAR FACTOR OF ACTIVATED T-CELLS, CYTOPLASMIC                                       |
| 30    | 1p7h-M | 9.7  | 3.2  | 120  | 286                 | 19          | 5'-D(*AP*AP*TP*GP*GP*GP*GP*AP*CP*TP*TP*TP*CP*CP*A                                      |
| 31    | 2as5-M | 9.6  | 3.3  | 123  | 287                 | 20          | Structure of the DNA binding domains of NFAT and FOXP2 bound specifically to DNA       |
| 32    | 2as5-N | 9.6  | 3.3  | 123  | 287                 | 20          | Structure of the DNA binding domains of NFAT and FOXP2 bound specifically to DNA       |
| 33    | 2o93-M | 9.6  | 3.3  | 121  | 284                 | 19          | KAPPAB ENHANCER ELEMENT, DNA 25-MER;                                                   |
| 34    | 4y5w-A | 9.5  | 3.6  | 121  | 478                 | 11          | SIGNAL TRANSDUCER AND ACTIVATOR OF TRANSCRIPTION                                       |
| 35    | 1yvl-A | 9.5  | 3.4  | 124  | 652                 | 10          | SIGNAL TRANSDUCER AND ACTIVATOR OF TRANSCRIPTION                                       |
| 36    | 6mbz-B | 9.5  | 3.7  | 124  | 522                 | 11          | SIGNAL TRANSDUCER AND ACTIVATOR OF TRANSCRIPTION                                       |
| 37    | 1s9k-C | 9.5  | 3.4  | 121  | 280                 | 17          | HUMAN IL-2 ARRE1 PROMOTER ELEMENT, PLUS STRAND;                                        |
| 38    | 2o93-L | 9.4  | 3.4  | 122  | 287                 | 19          | KAPPAB ENHANCER ELEMENT, DNA 25-MER;                                                   |
| 39    | 1ikn-A | 9.4  | 3.3  | 116  | 282                 | 15          | PROTEIN (NF-KAPPA-B P65 SUBUNIT);                                                      |
| 40    | 1lei-B | 9.4  | 2.7  | 117  | 312                 | 17          | NUCLEAR FACTOR NF-KAPPA-B P65 SUBUNIT                                                  |
| 41    | 5d39-C | 9.4  | 3.7  | 123  | 484                 | 10          | SIGNAL TRANSDUCER AND ACTIVATOR OF TRANSCRIPTION                                       |
| 42    | 2o61-A | 9.2  | 3.4  | 119  | 498                 | 14          | 36-MER;                                                                                |
| 43    | 1ram-B | 9.2  | 3.3  | 119  | 273                 | 14          | A NOVEL DNA RECOGNITION MODE BY NF-KB P65 HOMODIMER                                    |
| 44    | 6ggr-A | 9.2  | 3.1  | 113  | 168                 | 15          | TRANSCRIPTION FACTOR P65;                                                              |
| 45    | 2ram-B | 9.1  | 3.3  | 118  | 273                 | 14          | A NOVEL DNA RECOGNITION MODE BY NF-KB P65 HOMODIMER                                    |
| 46    | 2i9t-A | 9.1  | 3.6  | 123  | 275                 | 15          | Transcription factor p65                                                               |
| 47    | 5u01-C | 9.1  | 3.6  | 118  | 273                 | 15          | TRANSCRIPTION FACTOR P65;                                                              |
| 48    | 1a02-N | 9.1  | 3.4  | 120  | 280                 | 19          | STRUCTURE OF THE DNA BINDING DOMAINS OF NFAT, FOS AND JUN BOUND TO DNA                 |
| 49    | 1lei-A | 9    | 3.5  | 119  | 273                 | 14          | p65 subunit of NF-kappa B                                                              |
| 50    | 5u01-B | 9    | 3.4  | 119  | 273                 | 14          | TRANSCRIPTION FACTOR P65;                                                              |
| 51    | 6nuq-A | 9    | 3.8  | 120  | 522                 | 10          | SIGNAL TRANSDUCER AND ACTIVATOR OF TRANSCRIPTION                                       |
| 52    | 4y5w-D | 8.9  | 3.4  | 120  | 472                 | 11          | SIGNAL TRANSDUCER AND ACTIVATOR OF TRANSCRIPTION                                       |
| 53    | 2v2t-A | 8.9  | 3.2  | 122  | 279                 | 13          | TRANSCRIPTION FACTOR RELB;                                                             |
| 54    | 1y1u-C | 8.9  | 3.5  | 124  | 544                 | 14          | SIGNAL TRANSDUCER AND ACTIVATOR OF TRANSCRIPTION                                       |
| 55    | 1y1u-B | 8.9  | 3.6  | 124  | 544                 | 14          | SIGNAL TRANSDUCER AND ACTIVATOR OF TRANSCRIPTION                                       |
| 56    | 1y1u-A | 8.9  | 3.6  | 124  | 544                 | 14          | SIGNAL TRANSDUCER AND ACTIVATOR OF TRANSCRIPTION CRYSTAL STRUCTURE OF THE NFKB P50/P65 |
| 57    | 1vxx-A | 8.8  | 3.4  | 118  | 273                 | 14          | HETERODIMER COMPLEXED TO THE IMMUNOGLOBULIN KB DNA                                     |
| 58    | 1ram-A | 8.8  | 3.6  | 117  | 273                 | 15          | A NOVEL DNA RECOGNITION MODE BY NF-KB P65 HOMODIMER                                    |
| 59    | 1le5-A | 8.8  | 3.5  | 120  | 274                 | 15          | 5'-D(*TP*GP*GP*GP*AP*AP*AP*TP*TP*CP*CP*T)-3';                                          |

|     |        |     |     |     |     |    |                                                                                                                                          |
|-----|--------|-----|-----|-----|-----|----|------------------------------------------------------------------------------------------------------------------------------------------|
| 60  | 3gut-G | 8.8 | 3.6 | 117 | 273 | 15 | TRANSCRIPTION FACTOR P65;                                                                                                                |
| 61  | 2ram-A | 8.8 | 3.6 | 119 | 273 | 14 | A NOVEL DNA RECOGNITION MODE BY NF-KB P65<br>HOMODIMER                                                                                   |
| 62  | 1le9-B | 8.8 | 2.7 | 120 | 312 | 17 | 5'-D(*TP*GP*GP*GP*AP*CP*TP*TP*TP*CP*CP*T)-3';                                                                                            |
| 63  | 1gji-A | 8.8 | 2.9 | 119 | 275 | 15 | IL-2 CD28RE DNA;                                                                                                                         |
| 64  | 1gji-B | 8.7 | 3   | 122 | 275 | 14 | IL-2 CD28RE DNA;                                                                                                                         |
| 65  | 3gut-C | 8.7 | 3.2 | 114 | 273 | 15 | TRANSCRIPTION FACTOR P65;                                                                                                                |
| 66  | 5d39-A | 8.7 | 3.8 | 125 | 489 | 12 | SIGNAL TRANSDUCER AND ACTIVATOR OF TRANSCRIPTION                                                                                         |
| 67  | 5u01-A | 8.7 | 3.7 | 120 | 273 | 15 | TRANSCRIPTION FACTOR P65;<br>CRYSTAL STRUCTURE OF THE NFKB P50/P65<br>HETERODIMER COMPLEXED TO THE IMMUNOGLOBULIN KB<br>DNA              |
| 68  | 1vix-B | 8.7 | 2.8 | 118 | 312 | 16 | TRANSCRIPTION FACTOR STAT3B/DNA COMPLEX                                                                                                  |
| 69  | 1bg1-A | 8.7 | 3.5 | 121 | 559 | 9  | SIGNAL TRANSDUCER AND ACTIVATOR OF TRANSCRIPTION                                                                                         |
| 70  | 6qhd-B | 8.7 | 3.6 | 122 | 532 | 10 | TRANSCRIPTION FACTOR P65;                                                                                                                |
| 71  | 3gut-E | 8.6 | 3.6 | 118 | 273 | 14 | TRANSCRIPTION FACTOR P65;                                                                                                                |
| 72  | 3gut-A | 8.6 | 3.5 | 116 | 273 | 15 | SIGNAL TRANSDUCER AND ACTIVATOR OF TRANSCRIPTION                                                                                         |
| 73  | 4y5w-B | 8.6 | 3.6 | 121 | 477 | 11 | SIGNAL TRANSDUCER AND ACTIVATOR OF TRANSCRIPTION                                                                                         |
| 74  | 6mbw-B | 8.6 | 3.7 | 125 | 523 | 11 | SIGNAL TRANSDUCER AND ACTIVATOR OF TRANSCRIPTION                                                                                         |
| 75  | 1le9-E | 8.5 | 3.5 | 118 | 273 | 14 | 5'-D(*TP*GP*GP*GP*AP*CP*TP*TP*TP*CP*CP*T)-3';                                                                                            |
| 76  | 1le5-E | 8.5 | 3.7 | 120 | 274 | 15 | 5'-D(*TP*GP*GP*GP*AP*AP*AP*TP*TP*CP*CP*T)-3';                                                                                            |
| 77  | 1yvl-B | 8.5 | 3.4 | 124 | 653 | 10 | SIGNAL TRANSDUCER AND ACTIVATOR OF TRANSCRIPTION                                                                                         |
| 78  | 6tlc-B | 8.5 | 3.7 | 122 | 535 | 9  | SIGNAL TRANSDUCER AND ACTIVATOR OF TRANSCRIPTION                                                                                         |
| 79  | 1le5-F | 8.5 | 2.9 | 119 | 313 | 17 | 5'-D(*TP*GP*GP*GP*AP*AP*AP*TP*TP*CP*CP*T)-3';                                                                                            |
| 80  | 1uur-A | 8.5 | 4.4 | 120 | 461 | 14 | STATA PROTEIN;                                                                                                                           |
| 81  | 1svc-P | 8.4 | 2.8 | 118 | 311 | 16 | NFKB P50 HOMODIMER BOUND TO DNA                                                                                                          |
| 82  | 3brd-A | 8.4 | 3.5 | 117 | 427 | 15 | CSL (Lag-1) bound to DNA with Lin-12 RAM peptide, P212121                                                                                |
| 83  | 6tlc-A | 8.4 | 3.6 | 121 | 533 | 9  | SIGNAL TRANSDUCER AND ACTIVATOR OF TRANSCRIPTION                                                                                         |
| 84  | 6mbz-A | 8.4 | 3.9 | 124 | 536 | 11 | SIGNAL TRANSDUCER AND ACTIVATOR OF TRANSCRIPTION                                                                                         |
| 85  | 6mbw-A | 8.4 | 3.6 | 121 | 524 | 12 | SIGNAL TRANSDUCER AND ACTIVATOR OF TRANSCRIPTION                                                                                         |
| 86  | 1nfi-A | 8.3 | 3.5 | 115 | 294 | 14 | NF-KAPPA-B P65;<br>Structure of NF-kB p65-p50 heterodimer bound to PRDII element<br>of B-interferon promoter                             |
| 87  | 2i9t-B | 8.3 | 2.9 | 119 | 312 | 16 | TRANSCRIPTION FACTOR P65;                                                                                                                |
| 88  | 3gut-H | 8.2 | 2.7 | 119 | 312 | 17 | NF-KAPPA-B P65;                                                                                                                          |
| 89  | 1nfi-C | 8.2 | 3.5 | 115 | 300 | 14 | Crystal structure of activated Notch, CSL and MAML on HES-1<br>promoter DNA sequence                                                     |
| 90  | 2f8x-C | 8.2 | 3.4 | 113 | 424 | 16 | SIGNAL TRANSDUCER AND ACTIVATOR OF TRANSCRIPTION                                                                                         |
| 91  | 3cwg-B | 8.2 | 3.7 | 120 | 507 | 10 | TRANSCRIPTION FACTOR P65;                                                                                                                |
| 92  | 3gut-D | 8.2 | 2.8 | 120 | 312 | 17 | 5'-D(*TP*GP*GP*GP*AP*CP*TP*TP*TP*CP*CP*T)-3';                                                                                            |
| 93  | 1le9-F | 8.2 | 2.9 | 120 | 312 | 17 | 5'-D(*TP*GP*GP*GP*AP*AP*AP*TP*TP*CP*CP*T)-3';                                                                                            |
| 94  | 1le5-B | 8.2 | 3   | 119 | 313 | 17 | 5'-D(*TP*GP*GP*GP*AP*AP*AP*TP*TP*CP*CP*T)-3';                                                                                            |
| 95  | 5d39-B | 8.2 | 3.7 | 123 | 484 | 11 | SIGNAL TRANSDUCER AND ACTIVATOR OF TRANSCRIPTION                                                                                         |
| 96  | 6qhd-A | 8.2 | 3.6 | 122 | 530 | 10 | SIGNAL TRANSDUCER AND ACTIVATOR OF TRANSCRIPTION                                                                                         |
| 97  | 1le9-A | 8.2 | 3.6 | 116 | 273 | 15 | 5'-D(*TP*GP*GP*GP*AP*CP*TP*TP*TP*CP*CP*T)-3';                                                                                            |
| 98  | 1uus-A | 8.1 | 4.4 | 121 | 465 | 14 | STAT PROTEIN;                                                                                                                            |
| 99  | 3cwg-A | 8.1 | 3.7 | 120 | 501 | 10 | SIGNAL TRANSDUCER AND ACTIVATOR OF TRANSCRIPTION                                                                                         |
| 100 | 4y5w-C | 8   | 3.4 | 120 | 465 | 10 | SIGNAL TRANSDUCER AND ACTIVATOR OF TRANSCRIPTION                                                                                         |
| 101 | 3iag-C | 8   | 3.3 | 113 | 422 | 17 | CSL (RBP-Jk) bound to HES-1 nonconsensus site                                                                                            |
| 102 | 1ttu-A | 8   | 4.5 | 117 | 435 | 15 | Crystal Structure of CSL bound to DNA                                                                                                    |
| 103 | 1nfk-A | 8   | 3.2 | 119 | 312 | 17 | DNA (5'-D(*TP*GP*GP*GP*AP*AP*TP*TP*CP*CP*C)-3');<br>AVIAN RETICULOENDOTHELIOSIS VIRAL (V-REL)                                            |
| 104 | 3do7-A | 7.9 | 4.4 | 127 | 296 | 14 | RECOMBINING BINDING PROTEIN SUPPRESSOR OF                                                                                                |
| 105 | 3nbn-A | 7.9 | 3.3 | 113 | 423 | 18 | CSL (Lag-1) bound to DNA with Lin-12 RAM peptide, C2221                                                                                  |
| 106 | 3brf-A | 7.9 | 3.4 | 117 | 423 | 15 | RECOMBINING BINDING PROTEIN SUPPRESSOR OF                                                                                                |
| 107 | 3nbn-D | 7.9 | 3.3 | 111 | 423 | 17 | NOTCH-REGULATED ANKYRIN REPEAT-CONTAINING<br>PROTEIN                                                                                     |
| 108 | 6py8-C | 7.9 | 3.4 | 112 | 429 | 17 | DNA (5'-D(*AP*AP*TP*CP*TP*TP*TP*CP*CP*AP*CP*AP<br>NEUROGENIC LOCUS NOTCH HOMOLOG PROTEIN 1;<br>RECOMBINING BINDING PROTEIN SUPPRESSOR OF |
| 109 | 5eg6-C | 7.9 | 2.9 | 108 | 413 | 18 | RUNT-RELATED TRANSCRIPTION FACTOR 1;                                                                                                     |
| 110 | 3v79-C | 7.8 | 3.4 | 113 | 424 | 18 | RUNT-RELATED TRANSCRIPTION FACTOR 1;                                                                                                     |
| 111 | 4j2x-C | 7.8 | 3.4 | 112 | 421 | 16 | RUNX1 TRANSCRIPTION FACTOR;                                                                                                              |
| 112 | 1eao-B | 7.7 | 2.3 | 95  | 124 | 9  | RUNT-RELATED TRANSCRIPTION FACTOR 1;                                                                                                     |
| 113 | 1eao-A | 7.7 | 2.3 | 95  | 124 | 9  | RUNT-RELATED TRANSCRIPTION FACTOR 1;                                                                                                     |
| 114 | 1ljm-A | 7.7 | 2.5 | 98  | 114 | 10 | RUNT-RELATED TRANSCRIPTION FACTOR 1;                                                                                                     |
| 115 | 1eaq-B | 7.7 | 2.3 | 95  | 125 | 9  | RUNT-RELATED TRANSCRIPTION FACTOR 1;                                                                                                     |
| 116 | 1p7h-L | 7.7 | 3.3 | 121 | 286 | 19 | 5'-D(*AP*AP*TP*GP*GP*GP*GP*AP*CP*TP*TP*TP*CP*CP*A<br>KAPPAB ENHANCER ELEMENT, DNA 25-MER;                                                |
| 117 | 2o93-O | 7.6 | 3.5 | 124 | 287 | 19 | RUNT-RELATED TRANSCRIPTION FACTOR 1;                                                                                                     |
| 118 | 1eaq-A | 7.6 | 2.2 | 94  | 124 | 10 | DNA (5'-D(*AP*AP*TP*CP*TP*TP*TP*CP*CP*AP*CP*AP<br>RUNT-RELATED TRANSCRIPTION FACTOR 1;                                                   |
| 119 | 6dks-G | 7.6 | 3.2 | 110 | 422 | 19 | RUNT-RELATED TRANSCRIPTION FACTOR 1;                                                                                                     |
| 120 | 1hjc-A | 7.6 | 2.5 | 98  | 118 | 10 | RUNT-RELATED TRANSCRIPTION FACTOR 1;                                                                                                     |
| 121 | 1ean-A | 7.5 | 2.1 | 94  | 114 | 10 | RUNT-RELATED TRANSCRIPTION FACTOR 1;                                                                                                     |
| 122 | 4j2x-A | 7.5 | 3.4 | 112 | 420 | 18 | RECOMBINING BINDING PROTEIN SUPPRESSOR OF                                                                                                |
| 123 | 2j6w-A | 7.4 | 2.3 | 95  | 124 | 9  | RUNT-RELATED TRANSCRIPTION FACTOR 1;                                                                                                     |
| 124 | 5zhu-C | 7.4 | 3.3 | 110 | 180 | 13 | MYELIN REGULATORY FACTOR;                                                                                                                |

|     |        |     |     |     |      |    |                                                       |
|-----|--------|-----|-----|-----|------|----|-------------------------------------------------------|
| 125 | 1ljm-B | 7.4 | 2.3 | 95  | 114  | 9  | RUNX1 TRANSCRIPTION FACTOR;                           |
| 126 | 1e50-Q | 7.4 | 2.4 | 95  | 110  | 9  | CORE-BINDING FACTOR ALPHA SUBUNIT;                    |
| 127 | 3wts-F | 7.4 | 2.5 | 98  | 118  | 10 | RUNT-RELATED TRANSCRIPTION FACTOR 1;                  |
| 128 | 3wtv-F | 7.4 | 2.5 | 98  | 118  | 10 | RUNT-RELATED TRANSCRIPTION FACTOR 1;                  |
| 129 | 3wtt-F | 7.4 | 2.5 | 98  | 118  | 10 | RUNT-RELATED TRANSCRIPTION FACTOR 1;                  |
| 130 | 1hjb-F | 7.4 | 2.5 | 98  | 120  | 10 | CCAAT/ENHANCER BINDING PROTEIN BETA;                  |
| 131 | 3wtu-F | 7.4 | 2.5 | 98  | 118  | 10 | RUNT-RELATED TRANSCRIPTION FACTOR 1;                  |
| 132 | 1io4-C | 7.4 | 2.4 | 97  | 120  | 10 | CSF-1R PROMOTER;                                      |
| 133 | 3wty-F | 7.4 | 2.6 | 98  | 118  | 10 | RUNT-RELATED TRANSCRIPTION FACTOR 1;                  |
| 134 | 5zhu-B | 7.3 | 3.3 | 111 | 183  | 13 | MYELIN REGULATORY FACTOR;                             |
| 135 | 5e24-E | 7.3 | 4.3 | 114 | 424  | 16 | MALTOSE-BINDING PERIPLASMIC PROTEIN;                  |
| 136 | 1e50-E | 7.3 | 2.7 | 100 | 119  | 10 | CORE-BINDING FACTOR ALPHA SUBUNIT;                    |
| 137 | 1e50-R | 7.3 | 2.4 | 95  | 110  | 9  | CORE-BINDING FACTOR ALPHA SUBUNIT;                    |
| 138 | 3wtt-A | 7.3 | 2.6 | 98  | 119  | 10 | RUNT-RELATED TRANSCRIPTION FACTOR 1;                  |
| 139 | 3wtw-F | 7.3 | 2.5 | 98  | 119  | 10 | RUNT-RELATED TRANSCRIPTION FACTOR 1;                  |
| 140 | 1hjc-D | 7.3 | 2.5 | 98  | 118  | 10 | RUNT-RELATED TRANSCRIPTION FACTOR 1;                  |
| 141 | 3wtu-A | 7.3 | 2.6 | 98  | 118  | 10 | RUNT-RELATED TRANSCRIPTION FACTOR 1;                  |
| 142 | 3wtx-F | 7.3 | 2.5 | 98  | 118  | 10 | RUNT-RELATED TRANSCRIPTION FACTOR 1;                  |
| 143 | 3wtx-A | 7.3 | 2.6 | 98  | 118  | 10 | RUNT-RELATED TRANSCRIPTION FACTOR 1;                  |
| 144 | 3wtv-A | 7.3 | 2.6 | 98  | 118  | 10 | RUNT-RELATED TRANSCRIPTION FACTOR 1;                  |
| 145 | 3wty-A | 7.3 | 2.6 | 98  | 118  | 10 | RUNT-RELATED TRANSCRIPTION FACTOR 1;                  |
| 146 | 3wu1-A | 7.3 | 2.5 | 98  | 123  | 10 | RUNT-RELATED TRANSCRIPTION FACTOR 1;                  |
| 147 | 1e50-G | 7.3 | 2.5 | 98  | 119  | 10 | CORE-BINDING FACTOR ALPHA SUBUNIT;                    |
| 148 | 6ux2-A | 7.2 | 3   | 113 | 619  | 9  | SIGNAL TRANSDUCER AND ACTIVATOR OF TRANSCRIPTION      |
| 149 | 2j6w-B | 7.2 | 2.3 | 95  | 124  | 9  | RUNT-RELATED TRANSCRIPTION FACTOR 1;                  |
| 150 | 1e50-A | 7.2 | 2.4 | 95  | 115  | 11 | CORE-BINDING FACTOR ALPHA SUBUNIT;                    |
| 151 | 3x17-A | 7.2 | 3.3 | 106 | 548  | 7  | ENDOGLUCANASE;                                        |
| 152 | 4l18-E | 7.2 | 2.5 | 98  | 141  | 10 | RUNT-RELATED TRANSCRIPTION FACTOR 1;                  |
| 153 | 4l18-A | 7.2 | 2.5 | 98  | 142  | 10 | RUNT-RELATED TRANSCRIPTION FACTOR 1;                  |
| 154 | 1h9d-A | 7.2 | 2.5 | 98  | 125  | 10 | CORE-BINDING FACTOR ALPHA SUBUNIT1;                   |
| 155 | 3wts-A | 7.2 | 2.6 | 98  | 119  | 10 | RUNT-RELATED TRANSCRIPTION FACTOR 1;                  |
| 156 | 1h9d-C | 7.2 | 2.5 | 98  | 125  | 10 | CORE-BINDING FACTOR ALPHA SUBUNIT1;                   |
| 157 | 4l0z-A | 7.2 | 2.5 | 98  | 147  | 10 | RUNT-RELATED TRANSCRIPTION FACTOR 1;                  |
| 158 | 3wtw-A | 7.2 | 2.6 | 98  | 118  | 10 | RUNT-RELATED TRANSCRIPTION FACTOR 1;                  |
| 159 | 1hjb-C | 7.2 | 2.5 | 98  | 120  | 10 | CCAAT/ENHANCER BINDING PROTEIN BETA;                  |
| 160 | 5u01-D | 7.1 | 3.2 | 116 | 273  | 15 | TRANSCRIPTION FACTOR P65;                             |
| 161 | 3x17-B | 7.1 | 3.2 | 106 | 548  | 8  | ENDOGLUCANASE;                                        |
| 162 | 5h5p-A | 7.1 | 3.2 | 110 | 184  | 13 | MYELIN REGULATORY FACTOR;                             |
| 163 | 4l0y-A | 7.1 | 2.5 | 98  | 128  | 10 | RUNT-RELATED TRANSCRIPTION FACTOR 1;                  |
| 164 | 1e50-C | 7.1 | 2.5 | 98  | 125  | 10 | CORE-BINDING FACTOR ALPHA SUBUNIT;                    |
| 165 | 5e24-F | 6.9 | 4.4 | 112 | 422  | 17 | MALTOSE-BINDING PERIPLASMIC PROTEIN;                  |
| 166 | 5yhu-B | 6.9 | 3.3 | 110 | 182  | 13 | MYELIN REGULATORY FACTOR;                             |
| 167 | 5zhu-A | 6.9 | 3.2 | 110 | 183  | 13 | MYELIN REGULATORY FACTOR;                             |
| 168 | 5yhu-A | 6.8 | 3.5 | 111 | 191  | 13 | MYELIN REGULATORY FACTOR;                             |
| 169 | 1f02-l | 6.8 | 2.6 | 94  | 282  | 7  | INTIMIN;                                              |
| 170 | 1f00-l | 6.7 | 2.9 | 94  | 282  | 7  | INTIMIN;                                              |
| 171 | 3aaz-A | 6.7 | 3.9 | 106 | 228  | 9  | HUMANIZED RECOMBINANT FAB FRAGMENT OF A MURINE;       |
| 172 | 3ly6-A | 6.7 | 3   | 92  | 683  | 7  | PROTEIN-GLUTAMINE GAMMA-GLUTAMYLTRANSFERASE 2;        |
| 173 | 3ly6-B | 6.7 | 3.1 | 92  | 683  | 7  | PROTEIN-GLUTAMINE GAMMA-GLUTAMYLTRANSFERASE 2;        |
| 174 | 4fxk-B | 6.7 | 3.3 | 97  | 697  | 9  | COMPLEMENT C4 BETA CHAIN;                             |
| 175 | 4d94-A | 6.7 | 4.6 | 114 | 1274 | 10 | THIOESTER-CONTAINING PROTEIN 1;                       |
| 176 | 4r7f-A | 6.6 | 3.2 | 107 | 397  | 7  | UNCHARACTERIZED PROTEIN;                              |
| 177 | 6grt-A | 6.6 | 3.3 | 102 | 593  | 8  | PAIRED IMMUNOGLOBULIN-LIKE RECEPTOR B;                |
| 178 | 3aaz-H | 6.6 | 3.8 | 103 | 229  | 10 | HUMANIZED RECOMBINANT FAB FRAGMENT OF A MURINE;       |
| 179 | 5uqy-D | 6.6 | 3.4 | 101 | 218  | 8  | ENVELOPE GLYCOPROTEIN GP1;                            |
| 180 | 5jpn-A | 6.6 | 4.2 | 114 | 651  | 11 | COMPLEMENT C4-A;                                      |
| 181 | 6dks-C | 6.5 | 3.3 | 113 | 417  | 19 | DNA (5'-D(*AP*AP*TP*CP*TP*TP*TP*CP*CP*CP*AP*CP*AP     |
| 182 | 3lso-A | 6.5 | 3.1 | 93  | 445  | 6  | PUTATIVE MEMBRANE ANCHORED PROTEIN;                   |
| 183 | 3lso-B | 6.5 | 3.7 | 97  | 445  | 7  | PUTATIVE MEMBRANE ANCHORED PROTEIN;                   |
| 184 | 1p84-J | 6.5 | 3.8 | 103 | 127  | 10 | UBIQUINOL-CYTOCHROME C REDUCTASE COMPLEX CORE PRO     |
| 185 | 1kyo-U | 6.5 | 3.8 | 102 | 127  | 9  | UBIQUINOL-CYTOCHROME C REDUCTASE COMPLEX CORE PRO     |
| 186 | 2ibz-X | 6.5 | 3.8 | 104 | 127  | 10 | UBIQUINOL-CYTOCHROME-C REDUCTASE COMPLEX CORE PRO     |
| 187 | 5uqy-H | 6.5 | 3.4 | 101 | 220  | 8  | ENVELOPE GLYCOPROTEIN GP1;                            |
| 188 | 6ysq-B | 6.5 | 4.5 | 118 | 651  | 12 | COMPLEMENT C4 BETA CHAIN;                             |
| 189 | 4fxk-A | 6.5 | 4.1 | 116 | 651  | 10 | COMPLEMENT C4 BETA CHAIN;                             |
| 190 | 5hcc-B | 6.5 | 4.4 | 117 | 647  | 10 | COMPLEMENT C5;                                        |
| 191 | 4e68-A | 6.4 | 3.6 | 123 | 559  | 11 | Unphosphorylated STAT3B core protein binding to dsDNA |
| 192 | 2ice-A | 6.4 | 3.6 | 106 | 642  | 9  | COMPLEMENT C3 BETA CHAIN;                             |

|     |        |     |     |     |      |    |                                                      |
|-----|--------|-----|-----|-----|------|----|------------------------------------------------------|
| 193 | 4b0m-M | 6.4 | 4.3 | 105 | 212  | 10 | F1 CAPSULE-ANCHORING PROTEIN;                        |
| 194 | 6grq-A | 6.4 | 3.3 | 102 | 536  | 7  | PAIRED IMMUNOGLOBULIN-LIKE RECEPTOR B;               |
| 195 | 6h3j-C | 6.4 | 3.7 | 108 | 397  | 8  | PROTEIN INVOLVED IN GLIDING MOTILITY SPRA;           |
| 196 | 5weq-B | 6.4 | 3.2 | 100 | 219  | 10 | MR78 MUTANT LIGHT CHAIN;                             |
| 197 | 3mIn-A | 6.4 | 2.7 | 109 | 206  | 12 | TRANSCRIPTION FACTOR COE1;                           |
| 198 | 5fo9-A | 6.4 | 3.2 | 98  | 642  | 8  | COMPLEMENT C3 BETA CHAIN;                            |
| 199 | 4f37-F | 6.4 | 3.8 | 102 | 225  | 9  | COLICIN-E7 IMMUNITY PROTEIN;                         |
| 200 | 4yzf-G | 6.4 | 3.6 | 99  | 223  | 8  | BAND 3 ANION TRANSPORT PROTEIN;                      |
| 201 | 5a16-C | 6.4 | 3.6 | 99  | 226  | 7  | FAB4201 HEAVY CHAIN;                                 |
| 202 | 4yr6-A | 6.4 | 3.4 | 99  | 215  | 10 | HEAVY CHAIN OF 5G6;                                  |
| 203 | 4irz-H | 6.4 | 3.8 | 102 | 217  | 9  | INTEGRIN ALPHA4 SUBUNIT;                             |
| 204 | 2erj-B | 6.4 | 3.6 | 94  | 204  | 3  | INTERLEUKIN-2 RECEPTOR ALPHA CHAIN;                  |
| 205 | 4cn4-B | 6.4 | 3.3 | 113 | 649  | 7  | ALPHA-1,4-GLUCAN\MALTOSE-1-PHOSPHATE<br>MALTOSYLTRA  |
| 206 | 4fxg-B | 6.4 | 3.4 | 97  | 740  | 9  | COMPLEMENT C4 BETA CHAIN;                            |
| 207 | 5fjb-E | 6.4 | 3.6 | 100 | 213  | 9  | ANTI-HCV E2 FAB HC84-1 LIGHT CHAIN;                  |
| 208 | 4w2o-G | 6.4 | 3.8 | 99  | 118  | 6  | ANTI-MARBURGVIRUS NUCLEOPROTEIN SINGLE DOMAIN<br>ANT |
| 209 | 1ezv-X | 6.4 | 3.7 | 102 | 127  | 10 | UBIQUINOL-CYTOCHROME C REDUCTASE COMPLEX CORE        |
| 210 | 3kIs-A | 6.4 | 4.4 | 115 | 1622 | 10 | COMPLEMENT C5;                                       |
| 211 | 3km9-A | 6.4 | 4.4 | 117 | 1459 | 10 | COMPLEMENT C5;                                       |
| 212 | 4e0s-A | 6.4 | 3.8 | 113 | 1552 | 12 | COMPLEMENT C5;                                       |
| 213 | 3pvm-A | 6.4 | 4.1 | 116 | 1627 | 12 | COMPLEMENT C5;                                       |
| 214 | 5hcd-B | 6.4 | 4.4 | 117 | 647  | 10 | COMPLEMENT C5;                                       |
| 215 | 5hce-B | 6.4 | 4.4 | 117 | 647  | 10 | COMPLEMENT C5;                                       |
| 216 | 4u48-A | 6.3 | 3.9 | 107 | 1538 | 19 | PUTATIVE INNER MEMBRANE LIPOPROTEIN;                 |
| 217 | 5lgy-A | 6.3 | 3.3 | 113 | 649  | 7  | ALPHA-1,4-GLUCAN\MALTOSE-1-PHOSPHATE<br>MALTOSYLTRAN |
| 218 | 4yzf-E | 6.3 | 3.5 | 99  | 223  | 8  | BAND 3 ANION TRANSPORT PROTEIN;                      |
| 219 | 5cvs-B | 6.3 | 3.3 | 113 | 649  | 7  | ALPHA-1,4-GLUCAN\MALTOSE-1-PHOSPHATE<br>MALTOSYLTRAN |
| 220 | 5a16-E | 6.3 | 3.4 | 99  | 226  | 8  | FAB4201 HEAVY CHAIN;                                 |
| 221 | 5a16-A | 6.3 | 3.4 | 99  | 226  | 8  | FAB4201 HEAVY CHAIN;                                 |
| 222 | 4yzf-K | 6.3 | 3.9 | 106 | 223  | 8  | BAND 3 ANION TRANSPORT PROTEIN;                      |
| 223 | 5a16-G | 6.3 | 3.3 | 99  | 226  | 8  | FAB4201 HEAVY CHAIN;                                 |
| 224 | 5lgy-B | 6.3 | 3.3 | 113 | 649  | 7  | ALPHA-1,4-GLUCAN\MALTOSE-1-PHOSPHATE<br>MALTOSYLTRAN |
| 225 | 3mlp-A | 6.3 | 2.6 | 107 | 337  | 12 | TRANSCRIPTION FACTOR COE1;                           |
| 226 | 4cn6-B | 6.3 | 3.3 | 113 | 649  | 7  | ALPHA-1,4-GLUCAN\MALTOSE-1-PHOSPHATE<br>MALTOSYLTRA  |
| 227 | 4cn6-A | 6.3 | 3.3 | 113 | 649  | 7  | ALPHA-1,4-GLUCAN\MALTOSE-1-PHOSPHATE<br>MALTOSYLTRA  |
| 228 | 1fgv-H | 6.3 | 3.6 | 102 | 120  | 7  | H52 FV (LIGHT CHAIN);                                |
| 229 | 2or9-I | 6.3 | 3.5 | 105 | 228  | 9  | MONOCLONAL ANTI-C-MYC ANTIBODY 9E10;                 |
| 230 | 4x7e-C | 6.3 | 4   | 103 | 121  | 8  | CAPSID PROTEIN;                                      |
| 231 | 4w2o-A | 6.3 | 3.6 | 100 | 118  | 7  | ANTI-MARBURGVIRUS NUCLEOPROTEIN SINGLE DOMAIN<br>ANT |
| 232 | 6i2g-A | 6.3 | 3.7 | 103 | 121  | 9  | ALFA NANOBODY;                                       |
| 233 | 3cu7-A | 6.3 | 4.4 | 116 | 1625 | 12 | COMPLEMENT C5;                                       |
| 234 | 4s0h-A | 6.3 | 3.4 | 106 | 176  | 8  | T-BOX TRANSCRIPTION FACTOR TBX5;                     |
| 235 | 3km9-B | 6.3 | 4.4 | 115 | 1459 | 10 | COMPLEMENT C5;                                       |
| 236 | 4hjj-H | 6.2 | 3.8 | 99  | 341  | 8  | INTERLEUKIN-18;                                      |
| 237 | 1cwv-A | 6.2 | 2.4 | 86  | 484  | 8  | INVASIN;                                             |
| 238 | 6njs-A | 6.2 | 3.7 | 120 | 523  | 9  | SIGNAL TRANSDUCER AND ACTIVATOR OF TRANSCRIPTION     |
| 239 | 5d39-D | 6.2 | 3.7 | 124 | 487  | 10 | SIGNAL TRANSDUCER AND ACTIVATOR OF TRANSCRIPTION     |
| 240 | 5ow3-C | 6.2 | 3   | 98  | 446  | 7  | PROTEIN HAPLESS 2;                                   |
| 241 | 3qrg-H | 6.2 | 3.7 | 100 | 220  | 10 | FAB LIGHT CHAIN;                                     |
| 242 | 3ly6-C | 6.2 | 3   | 92  | 683  | 7  | PROTEIN-GLUTAMINE GAMMA-GLUTAMYLTRANSFERASE 2;       |
| 243 | 2xwj-C | 6.2 | 3.7 | 103 | 640  | 9  | COMPLEMENT C3 BETA CHAIN;                            |
| 244 | 3mlo-A | 6.2 | 2.8 | 110 | 212  | 13 | TRANSCRIPTION FACTOR COE1;                           |
| 245 | 3vrl-E | 6.2 | 3.6 | 102 | 222  | 12 | A10F9 FAB HEAVY CHAIN;                               |
| 246 | 3rkd-D | 6.2 | 3.4 | 101 | 218  | 7  | CAPSID PROTEIN;                                      |
| 247 | 1ztx-H | 6.2 | 3.8 | 102 | 219  | 8  | ENVELOPE PROTEIN;                                    |
| 248 | 2co6-B | 6.2 | 4.2 | 105 | 208  | 8  | PUTATIVE OUTER MEMBRANE PROTEIN;                     |
| 249 | 5dqj-H | 6.2 | 3.6 | 105 | 222  | 9  | S55-5 FAB (IGG1 KAPPA) LIGHT CHAIN;                  |
| 250 | 2co7-B | 6.2 | 3.8 | 100 | 197  | 9  | SAFA PILUS SUBUNIT;                                  |
| 251 | 5dqj-A | 6.2 | 3.5 | 104 | 222  | 9  | S55-5 FAB (IGG1 KAPPA) LIGHT CHAIN;                  |
| 252 | 3j42-I | 6.2 | 3.6 | 103 | 216  | 11 | ENVELOPE PROTEIN E;                                  |
| 253 | 4hd9-A | 6.2 | 3.6 | 101 | 197  | 12 | MUCOSAL ADDRESSIN CELL ADHESION MOLECULE 1;          |
| 254 | 4x7e-D | 6.2 | 3.9 | 102 | 120  | 8  | CAPSID PROTEIN;                                      |
| 255 | 4hcr-B | 6.2 | 3.3 | 99  | 194  | 12 | PF-547659 HEAVY CHAIN;                               |

|     |        |     |     |     |      |    |                                                   |
|-----|--------|-----|-----|-----|------|----|---------------------------------------------------|
| 256 | 3so3-C | 6.2 | 3.6 | 102 | 220  | 11 | SUPPRESSOR OF TUMORIGENICITY 14 PROTEIN;          |
| 257 | 1t03-H | 6.2 | 3.7 | 101 | 225  | 10 | SYNTHETIC OLIGONUCLEOTIDE TEMPLATE;               |
| 258 | 4w2o-E | 6.2 | 3.6 | 98  | 118  | 7  | ANTI-MARBURGVIRUS NUCLEOPROTEIN SINGLE DOMAIN ANT |
| 259 | 4p2c-J | 6.2 | 4   | 105 | 127  | 8  | SHIGA TOXIN 2E, SUBUNIT A;                        |
| 260 | 1p53-A | 6.2 | 3.2 | 91  | 250  | 12 | INTERCELLULAR ADHESION MOLECULE-1;                |
| 261 | 3hs0-A | 6.2 | 3.9 | 106 | 613  | 7  | COBRA VENOM FACTOR;                               |
| 262 | 1nc4-B | 6.2 | 3.6 | 96  | 219  | 8  | MONOCLONAL ANTIBODY 2D12.5, LAMBDA LIGHT CHAIN;   |
| 263 | 5jtw-A | 6.2 | 4.3 | 112 | 651  | 11 | COMPLEMENT C4-A;                                  |
| 264 | 3bpl-B | 6.1 | 3.9 | 98  | 202  | 7  | INTERLEUKIN-4;                                    |
| 265 | 1bqs-A | 6.1 | 3.6 | 102 | 209  | 11 | PROTEIN (MUCOSAL ADDRESSIN CELL ADHESION MOLECULE |
| 266 | 4rtd-A | 6.1 | 3.8 | 104 | 1122 | 16 | UNCHARACTERIZED LIPOPROTEIN YFHM;                 |
| 267 | 3cmg-A | 6.1 | 6.2 | 87  | 661  | 3  | PUTATIVE BETA-GALACTOSIDASE;                      |
| 268 | 4g6k-H | 6.1 | 3.7 | 104 | 220  | 8  | HEAVY CHAIN OF GEVOKIZUMAB ANTIBODY BINDING       |
| 269 | 2gcy-B | 6.1 | 3.7 | 102 | 218  | 9  | HUC25 FAB FRAGMENT LIGHT CHAIN;                   |
| 270 | 4yzt-I | 6.1 | 3.6 | 98  | 223  | 8  | BAND 3 ANION TRANSPORT PROTEIN;                   |
| 271 | 3klh-D | 6.1 | 3.7 | 100 | 225  | 11 | REVERSE TRANSCRIPTASE/RIBONUCLEASE H;             |
| 272 | 3mln-B | 6.1 | 2.7 | 106 | 213  | 12 | TRANSCRIPTION FACTOR COE1;                        |
| 273 | 4oi9-A | 6.1 | 3.1 | 98  | 378  | 11 | INTERCELLULAR ADHESION MOLECULE 5;                |
| 274 | 6ysq-A | 6.1 | 4.5 | 99  | 651  | 9  | COMPLEMENT C4 BETA CHAIN;                         |
| 275 | 3mlp-B | 6.1 | 2.8 | 108 | 332  | 12 | TRANSCRIPTION FACTOR COE1;                        |
| 276 | 4hix-H | 6.1 | 3.8 | 103 | 219  | 8  | HUMANIZED 3D6 FAB HEAVY CHAIN;                    |
| 277 | 3mlp-E | 6.1 | 2.7 | 108 | 303  | 12 | TRANSCRIPTION FACTOR COE1;                        |
| 278 | 4hzi-H | 6.1 | 3.8 | 102 | 217  | 10 | FAB HEAVY CHAIN;                                  |
| 279 | 3mlp-F | 6.1 | 2.8 | 108 | 298  | 12 | TRANSCRIPTION FACTOR COE1;                        |
| 280 | 4uao-C | 6.1 | 3.8 | 103 | 223  | 9  | APICAL MEROZOITE ANTIGEN 1;                       |
| 281 | 5dq9-C | 6.1 | 3.6 | 102 | 217  | 9  | S55-3 FAB (IGG2B) HEAVY CHAIN;                    |
| 282 | 1z7z-I | 6.1 | 3.1 | 97  | 434  | 11 | HUMAN COXSACKIEVIRUS A21;                         |
| 283 | 4r4b-B | 6.1 | 3.8 | 104 | 220  | 11 | FAB 2.2C LIGHT CHAIN;                             |
| 284 | 3j42-K | 6.1 | 3.7 | 104 | 216  | 11 | ENVELOPE PROTEIN E;                               |
| 285 | 1ad9-H | 6.1 | 4   | 97  | 219  | 5  | IGG CTM01 FAB (LIGHT CHAIN);                      |
| 286 | 3p0g-B | 6.1 | 3.8 | 102 | 121  | 6  | BETA-2 ADRENERGIC RECEPTOR, LYSOZYME;             |
| 287 | 4cdg-D | 6.1 | 4   | 101 | 122  | 7  | BLOOM SYNDROME PROTEIN;                           |
| 288 | 4zff-A | 6.1 | 3.5 | 101 | 206  | 8  | FRAGMENT ANTIGEN BINDING (FAB) 5A12 HEAVY CHAIN;  |
| 289 | 3tnm-H | 6.1 | 3.7 | 100 | 221  | 10 | FAB HEAVY CHAIN OF HUMAN ANTI-HIV-1 ENV ANTIBODY  |
| 290 | 4u6v-H | 6.1 | 3.7 | 101 | 218  | 9  | FAB, ANTIGEN BINDING FRAGMENT, HEAVY CHAIN;       |
| 291 | 6h7k-D | 6.1 | 3.5 | 93  | 120  | 5  | THIOREDOXIN 1;                                    |
| 292 | 1p53-B | 6.1 | 3   | 91  | 250  | 11 | INTERCELLULAR ADHESION MOLECULE-1;                |
| 293 | 1gig-H | 6.1 | 3.7 | 101 | 221  | 9  | IGG1-KAPPA HC19 FAB (LIGHT CHAIN);                |
| 294 | 5o04-D | 6.1 | 3.9 | 101 | 119  | 7  | CAPSID PROTEIN;                                   |
| 295 | 3inu-H | 6.1 | 3.6 | 104 | 226  | 11 | KZ52 ANTIBODY FRAGMENT HEAVY CHAIN;               |
| 296 | 4oga-C | 6.1 | 3.6 | 102 | 118  | 9  | INSULIN A CHAIN;                                  |
| 297 | 2jff-H | 6.1 | 3.7 | 101 | 218  | 8  | LIGHT CHAIN OF A VEGF BINDING ANTIBODY;           |
| 298 | 4zff-H | 6.1 | 3.5 | 101 | 211  | 8  | FRAGMENT ANTIGEN BINDING (FAB) 5A12 HEAVY CHAIN;  |
| 299 | 6apq-A | 6.1 | 3.2 | 96  | 119  | 7  | ANTI-MARBURGVIRUS NUCLEOPROTEIN SINGLE DOMAIN ANT |
| 300 | 4ldl-B | 6.1 | 3.8 | 97  | 120  | 7  | LYSOZYME, BETA-2 ADRENERGIC RECEPTOR;             |
