# Supplementary material for: Phylogenomics analysis of velvet regulators in the fungal kingdom
Source: PubMed Central journal article supplement (PMC10845976; doi:10.1128/spectrum.03717-23), 2024-01-05
Supplement: spectrum.03717-23-s0004.pdf [file spectrum.03717-23-s0004.pdf]

**Table S3. Similar structures of VosA velvet domain in the 3D macromolecular structures database of NCBI by VAST+**

|    | <b>PDB ID</b> | <b>Description</b>                                                                                                                                                | <b>Taxonomy</b>                           | <b>RMSD</b> | <b>Aligned residues</b> | <b>Sequence identity</b> |
|----|---------------|-------------------------------------------------------------------------------------------------------------------------------------------------------------------|-------------------------------------------|-------------|-------------------------|--------------------------|
| 1  | 3QRF          | Structure of a domain-swapped FOXP3 dimer                                                                                                                         | Homo sapiens                              | 3.20Å       | 120                     | 18%                      |
| 2  | 1A02          | STRUCTURE OF THE DNA BINDING DOMAINS OF NFAT, FOS AND JUN BOUND TO DNA                                                                                            | Others                                    | 3.24Å       | 117                     | 18%                      |
| 3  | 1PZU          | An Asymmetric Nfat1-Rhr Homodimer On A Pseudo-Palindromic, Kappa-B Site                                                                                           | Others                                    | 2.42Å       | 110                     | 19%                      |
| 4  | 2V2T          | X-Ray Structure Of A Nf-Kb P50-Relb-Dna Complex                                                                                                                   | Others                                    | 3.21Å       | 106                     | 14%                      |
| 5  | 1S9K          | Crystal Structure Of Human Nfat1 And Fos-Jun On The Il-2 Arre1 Site                                                                                               | Others                                    | 2.38Å       | 103                     | 19%                      |
| 6  | 1LE9          | Crystal structure of a NF-kB heterodimer bound to the Ig/HIV-kB siti                                                                                              | Others                                    | 2.53Å       | 100                     | 18%                      |
| 7  | 1GJI          | Crystal Structure Of C-Rel Bound To Dna                                                                                                                           | Others                                    | 2.69Å       | 99                      | 16%                      |
| 8  | 2I9T          | Structure of NF-kB p65-p50 heterodimer bound to PRDII element of B-interferon promoter                                                                            | Mus musculus                              | 2.73Å       | 98                      | 19%                      |
| 9  | 1LE5          | Crystal structure of a NF-kB heterodimer bound to an IFN $\gamma$ -kB                                                                                             | Others                                    | 2.15Å       | 97                      | 19%                      |
| 10 | 2O6D          | Structure of native rTp34 from Treponema pallidum                                                                                                                 | Treponema pallidum                        | 3.42Å       | 97                      | 10%                      |
| 11 | 6MBZ          | Structure of Transcription Factor                                                                                                                                 | Homo sapiens                              | 2.40Å       | 96                      | 14%                      |
| 12 | 3PJL          | The Crystal Structure Of Tp34 Bound To Co (II) Ion At Ph 7.5                                                                                                      | Treponema pallidum                        | 3.39Å       | 96                      | 10%                      |
| 13 | 1LEI          | The kB DNA sequence from the HLV-LTR functions as an allosteric regulator of HIV transcription                                                                    | Others                                    | 1.99Å       | 95                      | 19%                      |
| 14 | 3DO7          | X-Ray Structure Of A Nf-Kb P52RELB DNA COMPLEX                                                                                                                    | Others                                    | 2.00Å       | 95                      | 21%                      |
| 15 | 1VKX          | Crystal Structure Of The Nfkb P50P65 HETERODIMER COMPLEXED To The Immunoglobulin Kb Dna                                                                           | Others                                    | 2.26Å       | 95                      | 20%                      |
| 16 | 1IKN          | IkappabalphaNF-Kappab Complex                                                                                                                                     | Homo sapiens/Mus musculus                 | 2.70Å       | 94                      | 16%                      |
| 17 | 6MBW          | Structure of Transcription Factor                                                                                                                                 | Homo sapiens                              | 2.21Å       | 93                      | 13%                      |
| 18 | 5ZHU          | Crystal structure of the DNA-binding domain of human myelin-gene regulatory factor                                                                                | Homo sapiens                              | 2.57Å       | 93                      | 15%                      |
| 19 | 2O6F          | Structure of metal- free rTp34 from Treponema pallidum                                                                                                            | Treponema pallidum                        | 3.29Å       | 93                      | 11%                      |
| 20 | 1BVO          | DORSAL HOMOLOGUE GAMBIF1 BOUND TO DNA                                                                                                                             | Anopheles gambiae                         | 2.03Å       | 92                      | 16%                      |
| 21 | 1NFK          | STRUCTURE OF THE NUCLEAR FACTOR KAPPA-B (NF-KB) P50 HOMODIMER                                                                                                     | Mus musculus                              | 2.10Å       | 92                      | 20%                      |
| 22 | 4Y5W          | Transcription Factor-dna Complex                                                                                                                                  | Homo sapiens                              | 2.11Å       | 92                      | 11%                      |
| 23 | 1EAO          | The Runx1 Runt Domain At 1.4a Resolution: A Structural Switch And Specifically Bound Chloride Ions Modulate Dna Binding                                           | Mus musculus                              | 2.19Å       | 92                      | 11%                      |
| 24 | 3LZR          | Crystal Structure Analysis Of Manganese Treated P19 Protein From Campylobacter Jejuni At 2.73 A At Ph 9 And Manganese Peak Wavelength (1.893 A)                   | Campylobacter jejuni subsp. jejuni 81-176 | 3.75Å       | 92                      | 12%                      |
| 25 | 5D39          | Transcription Factor-dna Complex                                                                                                                                  | Homo sapiens                              | 2.12Å       | 91                      | 11%                      |
| 26 | 5U01          | Cooperative DNA binding by two RelA dimers                                                                                                                        | Mus musculus/Synthesium                   | 2.25Å       | 91                      | 16%                      |
| 27 | 1E50          | AML1/CBFbeta complex                                                                                                                                              | Homo sapiens                              | 2.31Å       | 91                      | 10%                      |
| 28 | 6HQC          | Structural investigation of the TasA anchoring protein TapA from Bacillus subtilis                                                                                | Bacillus subtilis                         | 2.94Å       | 91                      | 3%                       |
| 29 | 2XTJ          | The crystal structure of PCSK9 in complex with 1D05 Fab                                                                                                           | Homo sapiens                              | 3.11Å       | 91                      | 8%                       |
| 30 | 5TVZ          | Solution NMR structure of Saccharomyces cerevisiae Pom152 Ig-like repeat, residues 718-820                                                                        | Saccharomyces cerevisiae                  | 3.90Å       | 91                      | 10%                      |
| 31 | 1A3Q          | Human Nf-Kappa-B P52 Bound To Dna                                                                                                                                 | Others                                    | 1.77Å       | 90                      | 22%                      |
| 32 | 3GUT          | Crystal structure of a higher-order complex of p50:RelA bound to the HIV-1 LTR                                                                                    | Others                                    | 2.20Å       | 90                      | 17%                      |
| 33 | 6GGR          | Crystal structure of Salmonella zinc metalloprotease effector GtgA in complex with p65                                                                            | Others                                    | 2.26Å       | 90                      | 17%                      |
| 34 | 1HJC          | CRYSTAL STRUCTURE OF RUNX-1/AML1/CBFALPHA RUNT DOMAIN BOUND TO A DNA FRAGMENT FROM THE CSF-1R PROMOTER                                                            | Homo sapiens/Mus musculus                 | 2.29Å       | 90                      | 10%                      |
| 35 | 1IO4          | Crystal Structure Of Runx-1AML1CBFALPHA RUNT DOMAIN- Cbfbeta Core Domain Heterodimer And CEBPBETA BZIP Homodimer Bound To A Dna Fragment From The Csf-1r Promoter | Others                                    | 2.31Å       | 90                      | 10%                      |
| 36 | 1HJB          | CRYSTAL STRUCTURE OF RUNX-1/AML1/CBFALPHA RUNT DOMAIN AND C/EBPBETA BZIP HOMODIMER BOUND TO A DNA FRAGMENT FROM THE CSF-1R PROMOTER                               | Homo sapiens/Mus musculus                 | 2.33Å       | 90                      | 10%                      |

|    |      |                                                                                                                          |                                                |       |    |     |
|----|------|--------------------------------------------------------------------------------------------------------------------------|------------------------------------------------|-------|----|-----|
| 37 | 1LJM | Dna Recognition Is Mediated By Conformational Transition And By Dna Bending                                              | Homo sapiens                                   | 2.36Å | 90 | 9%  |
| 38 | 3WTT | Crystal structure of the complex comprised of phosphorylated ETS1, RUNX1, CBFbeta, and the tcralpha gene enhancer DNA    | Others                                         | 2.36Å | 90 | 10% |
| 39 | 3WTY | Crystal structure of the complex comprised of ETS1(G333P), RUNX1, CBFbeta, and the tcralpha gene enhancer DNA            | Others                                         | 2.37Å | 90 | 10% |
| 40 | 3WTS | Crystal structure of the complex comprised of ETS1, RUNX1, CBFbeta, and the tcralpha gene enhancer DNA                   | Others                                         | 2.38Å | 90 | 10% |
| 41 | 6F58 | Crystal structure of human Brachyury (T) in complex with DNA                                                             | Homo sapiens                                   | 2.57Å | 90 | 6%  |
| 42 | 2RAM | A Novel Dna Recognition Mode By Nf-Kb P65 Homodimer                                                                      | Others                                         | 2.04Å | 89 | 17% |
| 43 | 1EAQ | The Runx1 Runt Domain At 1.25a Resolution: A Structural Switch And Specifically Bound Chloride Ions Modulate Dna Binding | Mus musculus                                   | 2.07Å | 89 | 10% |
| 44 | 2J6W | R164n Mutant Of The Runx1 Runt Domain                                                                                    | Mus musculus                                   | 2.14Å | 89 | 10% |
| 45 | 4L18 | Crystal Structure Of Runx1 And Ets1 Bound To Tcr Alpha Promoter (crystal Form 3)                                         | Homo sapiens/Mus musculus                      | 2.19Å | 89 | 9%  |
| 46 | 4L0Y | Crystal Structure Of Runx1 And Ets1 Bound To Tcr Alpha Promoter (crystal Form 1)                                         | Homo sapiens/Mus musculus                      | 2.20Å | 89 | 10% |
| 47 | 3WTU | Crystal structure of the complex comprised of ETS1 (V170A), RUNX1, CBFbeta, and the tcralpha gene enhancer DNA           | Others                                         | 2.23Å | 89 | 10% |
| 48 | 3WTX | Crystal structure of the complex comprised of ETS1(Y329A), RUNX1, CBFbeta, and the tcralpha gene enhancer DNA            | Others                                         | 2.25Å | 89 | 10% |
| 49 | 4L0Z | Crystal Structure Of Runx1 And Ets1 Bound To Tcr Alpha Promoter (crystal Form 2)                                         | Homo sapiens/Mus musculus                      | 2.31Å | 89 | 10% |
| 50 | 1H9D | Aml1/cbf-beta/dna complex                                                                                                | Homo sapiens                                   | 2.32Å | 89 | 10% |
| 51 | 6F59 | Crystal structure of human Brachyury (T) G177D variant in complex with DNA                                               | Homo sapiens                                   | 2.42Å | 89 | 7%  |
| 52 | 3WU1 | Crystal structure of the ETS1-RUNX1-DNA ternary complex                                                                  | Others                                         | 2.17Å | 88 | 10% |
| 53 | 3WTV | Crystal structure of the complex comprised of ETS1(V170G), RUNX1, CBFbeta, and the tcralpha gene enhancer DNA            | Others                                         | 2.35Å | 88 | 10% |
| 54 | 3E9U | Crystal Structure Of Calx Cbd2 Domain                                                                                    | Drosophila melanogaster                        | 4.30Å | 88 | 2%  |
| 55 | 1YVL | Structure Of Unphosphorylated Stat1                                                                                      | Others                                         | 1.56Å | 87 | 13% |
| 56 | 4Y5U | Transcription Factor                                                                                                     | Homo sapiens                                   | 1.92Å | 87 | 11% |
| 57 | 1EAN | The Runx1 Runt Domain At 1.70a Resolution: A Structural Switch And Specifically Bound Chloride Ions Modulate Dna Binding | Mus musculus                                   | 2.17Å | 86 | 9%  |
| 58 | 5QSA | PanDDA analysis group deposition -- Crystal Structure of human Brachyury G177D variant in complex with Z2856434778       | Homo sapiens                                   | 2.22Å | 86 | 7%  |
| 59 | 3WTW | Crystal structure of the complex comprised of ETS1(K167A), RUNX1, CBFbeta, and the tcralpha gene enhancer DNA            | Others                                         | 2.22Å | 86 | 10% |
| 60 | 2JHS | Crystal Structure Of Rhogdi K135h,K138h,K141h Mutant                                                                     | Homo sapiens                                   | 3.26Å | 86 | 9%  |
| 61 | 2X6V | Crystal Structure Of Human Tbx5 In The Dna-Bound And Dna- Free Form                                                      | Others                                         | 2.07Å | 85 | 9%  |
| 62 | 3PJN | The Crystal Structure Of Tp34 Bound To Zn(II) Ion At Ph 7.5                                                              | Treponema pallidum                             | 2.80Å | 85 | 12% |
| 63 | 2O6E | Structure of native rTp34 from Treponema pallidum from zinc-soaked crystals                                              | Treponema pallidum Clostridium                 | 2.82Å | 85 | 12% |
| 64 | 2OZN | The Cohesin-Dockerin Complex Of Nagj And Nagh From Clostridium Perfringens                                               | perfringens/Clostridium perfringens ATCC 13124 | 3.04Å | 85 | 12% |
| 65 | 1Z8Y | Mapping the E2 Glycoprotein of Alphaviruses                                                                              | Sindbis virus                                  | 3.45Å | 84 | 8%  |
| 66 | 5FLV | Crystal Structure Of Nkx2-5 And Tbx5 Bound To The Nppa Promoter Region                                                   | Mus musculus                                   | 2.16Å | 81 | 9%  |
| 67 | 6D4A | Cell Surface Receptor with Bound Ligand at 1.75-Å Resolution                                                             | Homo sapiens                                   | 3.10Å | 81 | 6%  |
| 68 | 6TLC | Unphosphorylated human STAT3 in complex with MS3-6 monoclonal antibody                                                   | Homo sapiens                                   | 1.36Å | 80 | 13% |

|     |      |                                                                                                                                                                             |                                           |       |    |     |
|-----|------|-----------------------------------------------------------------------------------------------------------------------------------------------------------------------------|-------------------------------------------|-------|----|-----|
| 69  | 2LT9 | The solution structure of Ca <sup>2+</sup> binding domain 2B of the third isoform of the Na <sup>+</sup> /Ca <sup>2+</sup> exchanger                                        | Mus musculus                              | 3.92Å | 80 | 4%  |
| 70  | 3MQI | Human Early B-Cell Factor 1 (Ebf1) IptTIG DOMAIN                                                                                                                            | Homo sapiens                              | 3.08Å | 79 | 9%  |
| 71  | 6D48 | Cell Surface Receptor                                                                                                                                                       | Homo sapiens                              | 3.19Å | 79 | 6%  |
| 72  | 4NLH | Skich Domain Of Human Tax1bp1                                                                                                                                               | Homo sapiens                              | 2.54Å | 78 | 9%  |
| 73  | 4HUM | Mate Transporter Norm-ng In Complex With Ethidium And Monobody                                                                                                              | Escherichia coli/Neisseria gonorrhoeae    | 2.96Å | 78 | 5%  |
| 74  | 6P1E | Cu-bound PmoF1 PCuAC domain (dimer)                                                                                                                                         | TCDC-NG08107 Methylocystis sp. ATCC 49242 | 3.01Å | 78 | 8%  |
| 75  | 5Z7G | Crystal structure of TAX1BP1 SKICH region in complex with NAP1                                                                                                              | Homo sapiens                              | 2.53Å | 77 | 9%  |
| 76  | 5Z7A | Crystal structure of NDP52 SKICH region                                                                                                                                     | Homo sapiens                              | 2.58Å | 77 | 5%  |
| 77  | 3LZN | Crystal Structure Analysis Of The Apo P19 Protein From Campylobacter Jejuni At 1.59 A At Ph 9                                                                               | Campylobacter jejuni subsp. jejuni 81-176 | 3.07Å | 77 | 5%  |
| 78  | 3K2M | Crystal Structure of Monobody HA4/Ab1 SH2 Domain Complex                                                                                                                    | Homo sapiens                              | 3.13Å | 76 | 3%  |
| 79  | 2NMS | The Crystal Structure Of The Extracellular Domain Of The Inhibitor Receptor Expressed On Myeloid Cells Irem-1                                                               | Homo sapiens                              | 2.60Å | 75 | 4%  |
| 80  | 3IDU | Crystal Structure of the CARDB domain of the PF1109 protein in complex with di-metal ions from Pyrococcus furiosus, Northeast Structural Genomics Consortium Target Pfr193A | Pyrococcus furiosus                       | 2.68Å | 73 | 11% |
| 81  | 5I0V | Iron And Copper-bound P19 From Campylobacter Jejuni Under Oxidizing Conditions                                                                                              | Campylobacter jejuni subsp. jejuni 81-176 | 2.79Å | 72 | 4%  |
| 82  | 4U6T | Crystal structure of the Clostridium histolyticum colH collagenase polycystic kidney disease-like domain 2a at 1.76 Angstrom resolution                                     | Hathewayia histolytica                    | 2.60Å | 71 | 3%  |
| 83  | 4HUN | MATE transporter NorM-NG in complex with R6G and monobody                                                                                                                   | Escherichia coli/Neisseria gonorrhoeae    | 2.75Å | 71 | 6%  |
| 84  | 2AW2 | Crystal Structure Of The Human Btla-hvem Complex                                                                                                                            | TCDC-NG08107                              | 2.79Å | 70 | 14% |
| 85  | 3VVV | Skich Domain Of Ndp52                                                                                                                                                       | Homo sapiens                              | 2.35Å | 69 | 4%  |
| 86  | 6VHI | Crystal structure of the human ILRUN Fw domain                                                                                                                              | Homo sapiens                              | 2.52Å | 69 | 6%  |
| 87  | 1U36 | Crystal structure of WLAC mutant of dimerisation domain of NF-kB p50 transcription factor                                                                                   | Mus musculus                              | 2.53Å | 69 | 14% |
| 88  | 3TEU | Crystal structure of fibcon                                                                                                                                                 | Others                                    | 2.53Å | 69 | 7%  |
| 89  | 1U3Y | Crystal structure of ILAC mutant of dimerisation domain of NF-kB p50 transcription factor                                                                                   | Mus musculus                              | 2.57Å | 69 | 14% |
| 90  | 1U41 | Crystal structure of YLGV mutant of dimerisation domain of NF-kB p50 transcription factor                                                                                   | Mus musculus                              | 2.58Å | 69 | 14% |
| 91  | 2Y72 | Crystal Structure Of The Pkd Domain Of Collagenase G From Clostridium Histolyticum At 1.18 Angstrom Resolution                                                              | Hathewayia histolytica                    | 2.91Å | 69 | 10% |
| 92  | 2R39 | Crystal Structure Of Fixg-Related Protein From Vibrio Parahaemolyticus                                                                                                      | Vibrio parahaemolyticus RIMD 2210633      | 2.37Å | 68 | 9%  |
| 93  | 4JRW | Crystal structure of Clostridium histolyticum colg collagenase PKD domain 2 at 1.6 Angstrom resolution                                                                      | Hathewayia histolytica                    | 2.71Å | 68 | 9%  |
| 94  | 4AQO | Crystal Structure Of The Calcium Bound Pkd-like Domain Of Collagenase G From Clostridium Histolyticum At 0.99 Angstrom Resolution                                           | Hathewayia histolytica                    | 2.87Å | 68 | 9%  |
| 95  | 4MMX | Integrin AlphaVBeta3 ectodomain bound to the tenth domain of Fibronectin                                                                                                    | Homo sapiens                              | 2.87Å | 68 | 6%  |
| 96  | 3LZQ | Crystal Structure Analysis Of Manganese Treated P19 Protein From Campylobacter Jejuni At 1.41 A At Ph 9                                                                     | Campylobacter jejuni subsp. jejuni 81-176 | 2.50Å | 67 | 12% |
| 97  | 5L74 | Plexin A2 extracellular segment domains 4-5 (PSI2-IPT2), resolution 1.36 Angstrom                                                                                           | Mus musculus                              | 2.63Å | 67 | 7%  |
| 98  | 1U3J | Crystal structure of MLAV mutant of dimerisation domain of NF-kB p50 transcription factor                                                                                   | Mus musculus                              | 2.65Å | 67 | 12% |
| 99  | 6NYP | Crystal structure of UL144/BTLA complex                                                                                                                                     | Others                                    | 2.73Å | 67 | 13% |
| 100 | 4U7K | Crystal structure of the Clostridium histolyticum colH collagenase polycystic kidney disease-like domain 2a in the presence of calcium at 1.9 Angstrom resolution           | Hathewayia histolytica                    | 2.90Å | 67 | 3%  |

|     |      |                                                                                                                                                        |                               |       |    |     |
|-----|------|--------------------------------------------------------------------------------------------------------------------------------------------------------|-------------------------------|-------|----|-----|
| 101 | 2LFE | Solution NMR structure of N-terminal domain of human E3 ubiquitin-protein ligase HECW2, Northeast structural genomics consortium (NESG) target ht6306A | Homo sapiens                  | 2.59Å | 66 | 8%  |
| 102 | 4TN9 | Crystal structure of Clostridium histolyticum ColG collagenase polycystic kidney disease-like domain at 1.4 Angstrom resolution                        | Hathewayahistolytica          | 2.71Å | 66 | 9%  |
| 103 | 4HJI | Structure Of The Cooa Pilin Subunit From Enterotoxigenic Escherichia Coli                                                                              | Escherichia coli              | 3.19Å | 66 | 8%  |
| 104 | 5FM8 | Structure of the C-terminally extended domain My4 of human myomesin (space group P65)                                                                  | Homo sapiens                  | 2.27Å | 65 | 11% |
| 105 | 4N68 | Crystal Structure Of An Internal Fn3 Domain From Human Contactin-5 [psi-nysgrc-005804]                                                                 | Homo sapiens                  | 2.50Å | 65 | 6%  |
| 106 | 5Z7L | Crystal structure of NDP52 SKICH region in complex with NAP1                                                                                           | Homo sapiens                  | 2.58Å | 65 | 8%  |
| 107 | 2W0P | Crystal Structure Of The Filamin A Repeat 21 Complexed With The Migfilin Peptide                                                                       | Homo sapiens                  | 2.67Å | 64 | 13% |
| 108 | 2JJT | Structure of human CD47 in complex with human signal regulatory protein (SIRP) alpha                                                                   | Homo sapiens                  | 2.97Å | 64 | 11% |
| 109 | 6W8X | Cryo-EM of the S. solfataricus pilus                                                                                                                   | Saccharolobus solfataricus    | 4.08Å | 64 | 11% |
| 110 | 5IUS | Crystal Structure Of Human Pd-1 In Complex With High Affinity Pd-1 Mutant                                                                              | Homo sapiens                  | 2.74Å | 63 | 5%  |
| 111 | 1I8L | Human B7-1CTLA-4 Co-Stimulatory Complex                                                                                                                | Homo sapiens                  | 2.42Å | 62 | 8%  |
| 112 | 2CD0 | Structure Of Human Lambda-6 Light Chain Dimer Wil                                                                                                      | Homo sapiens                  | 2.93Å | 62 | 6%  |
| 113 | 6C6Q | Crystal Structure of the Murine Norovirus VP1 P Domain in complex with the CD300lf Receptor                                                            | Others                        | 2.45Å | 61 | 2%  |
| 114 | 5OC7 | Crystal structure of the pleckstrin-homology domain of Bcr-Abl in complex with monobody Mb(Bcr-PH_4)                                                   | Others                        | 2.15Å | 60 | 7%  |
| 115 | 2MOG | Solution structure of the terminal Ig-like domain from Leptospira interrogans LigB                                                                     | Leptospira interrogans        | 2.41Å | 60 | 8%  |
| 116 | 2HAZ | Crystal Structure Of The First Fibronectin Domain Of Human Ncam1                                                                                       | Homo sapiens                  | 2.47Å | 60 | 3%  |
| 117 | 3RNK | Crystal structure of the complex between mouse PD-1 mutant and PD-L2 IgV domain                                                                        | Mus musculus                  | 2.48Å | 58 | 9%  |
| 118 | 6HIG | hPD-1/NBO1a Fab complex                                                                                                                                | Homo sapiens/Mus musculus     | 3.03Å | 58 | 10% |
| 119 | 2N1K | Structure of the Third Type III Domain from Human Fibronectin                                                                                          | Homo sapiens                  | 1.92Å | 56 | 13% |
| 120 | 6C74 | Crystal Structure of Murine CD300lf in complex with phosphocholine                                                                                     | Mus musculus                  | 2.20Å | 56 | 2%  |
| 121 | 7BYR | BD23-Fab in complex with the S ectodomain trimer                                                                                                       | Others                        | 2.27Å | 55 | 4%  |
| 122 | 1AC6 | Crystal Structure Of A Variable Domain Mutant Of A T-cell Receptor Alpha Chain                                                                         | Mus musculus                  | 2.41Å | 55 | 11% |
| 123 | 3B83 | Computer-based Redesign Of A Beta Sandwich Protein Suggests That Extensive Negative Design Is Not Required For De Novo Beta Sheet Design               | Homo sapiens                  | 3.10Å | 55 | 7%  |
| 124 | 4U3H | Crystal Structure Of Fn3con                                                                                                                            | Others                        | 2.05Å | 54 | 7%  |
| 125 | 5ECJ | Crystal structure of monobody Mb(S4) bound to Prdm14 in complex with Mtgr1                                                                             | Homo sapiens/Mus musculus     | 1.73Å | 53 | 11% |
| 126 | 1CD0 | Structure Of Human Lamda-6 Light Chain Dimer Jto                                                                                                       | Homo sapiens                  | 2.65Å | 53 | 9%  |
| 127 | 6BYN | Crystal structure of WDR5-Mb(S4) monobody complex                                                                                                      | Homo sapiens                  | 1.88Å | 52 | 8%  |
| 128 | 4JE4 | Crystal Structure Of Monobody Nsa1/shp2 N-sh2 Domain Complex                                                                                           | Homo sapiens                  | 2.11Å | 51 | 12% |
| 129 | 3SO5 | Crystal structure of an Immunoglobulin I-set domain of Lrig3 protein (Lrig3) from MUS MUSCULUS at 1.70 A resolution                                    | Mus musculus                  | 1.97Å | 50 | 12% |
| 130 | 5FQ7 | Crystal Structure Of The Suscd Complex Bt2261-2264 From Bacteroides Thetaiotaomicro n                                                                  | Bacteroides thetaiotaomicro n | 2.25Å | 50 | 12% |
| 131 | 3RZW | Crystal Structure of the Monobody ySMB-9 bound to human SUMO1                                                                                          | Homo sapiens                  | 1.92Å | 49 | 10% |
| 132 | 2MTP | The structure of Filamin repeat 21 bound to integrin                                                                                                   | Homo sapiens                  | 2.69Å | 44 | 9%  |
